# Supplementary material
Source: Research Square preprint supplement (doi:10.21203/rs.3.rs-9153032/v1)
Supplement: Supplementary file 1 [file 295fac2e7d08902238236622.xlsx]

## Sheet: S1 - Quantified Proteomics
Protein	Milk_1	Milk_2	Milk_3	Milk_4	On-Sheep_1	On-Sheep_2	On-Sheep_3	On-Sheep_4	Sera_1	Sera_2	Sera_3	Sera_4
FRDA_SERS3							174737
TNAA_PROIN		36728.7	25618.3	65837.5	2.63438e+06	1.79363e+06	3.60857e+06	1.42697e+06
EFTU_CHLPN						1.99943e+06		2.62585e+06
STK25_MOUSE	106940	83901.1	80114.2	50712.6	44006.3	50883.9	60413	58282.1	172623	163821	158780	110737
G3P_CUTCU	585353	1.40664e+06	1.35953e+06	1.86055e+06	7.09347e+06	6.42412e+06	1.38912e+07	1.00763e+07	292351	536751	459238	359305
PRS8_CAEEL	725559	558279	967268	1.36652e+06					932343	1.73296e+06	1.23673e+06	2.25018e+06
APA3_ARATH	122603	492474	186471	136568
CH60_PSET1	392822	99452	417988	249851	814437	3.33084e+06	131720	2.96548e+06
KGUA_SALTY	132357	104838	223155	98498	26503.5	234776	898823	550115
PT1_BUCAI							381931
RL38_DROME		266128	367303	330978					959690	603665	795969	996440
CISY_DROME	3.43784e+06	3.94044e+06	1.85772e+06	893112	290477	597807	441091	423653	1.1787e+06	712210	1.43252e+06	1.00843e+06
RS28_DROME	1.07468e+06	1.25489e+06	1.0661e+06	1.98832e+06	257132	107879		320460	2.37745e+06	3.00403e+06	2.43792e+06	3.34396e+06
CAPZA_DROME	332948	167721	366090	342207					296823	364616	172383	261672
SCOT_DROME	1.87669e+06	1.74212e+06	785545	98684.9		201145		293342	189650	251477	271868
NECAP_DROME	545555	390454	457879	605797					441181	716216	626577	984219
EIF3L_DROME			23322.9						39330.6	63333.4	35634.5	62008
R10AB_DROME	2.19111e+06	1.45629e+06	1.16557e+06	359576	702501	1.19145e+06	788522	2.17153e+06	3.77307e+06	4.29259e+06	1.55218e+06	3.04678e+06
GOLP3_DROME		104249	150390	40719.1		22587	22830	45337.4	164589	18236.5	156620	237428
ACSA_DROME	311754	56964.3
TRXR2_DROME				143032		194996			204105	273769	328480	318341
RTCB_DROME	698180	454137	361075	808698	92838.2	111639	88871	135656	622948	823557	1.00091e+06	914778
PICAL_DROME									73655.7	90352.5	55032.7	73974.6
IF4A3_DROME	270230	194633	487560	258708					210372	216667	169247	163082
DDX3_DROME			23847.1						7719.58			24475.8
TPP2_DROME				341663				252530	253270		323039
SEC13_DROME	1.01164e+06	850263	1.05194e+06	1.22989e+06		83172.3		145434	662212	1.33107e+06	1.22045e+06	2.11031e+06
PYC_SCHPO	1.82784e+06	1.36949e+06	952106	666025					802379	420837	647107	794080
ZPI_HUMAN						68507.1	166180	39359.8	37015.7
STML2_HUMAN	1.20139e+06	830791	884504	404452					878355	710135	198252	264874
AT5G_MANSE	8.73972e+06	1.0243e+07	1.14516e+07	6.64902e+06	3.55083e+06	3.98334e+06	2.81101e+06	5.2098e+06	7.85971e+06	9.35717e+06	7.32367e+06	5.82362e+06
SPA31_BOVIN					309133	203663	1.45812e+06	756961	355727	140337	110689	127788
EF1G_DROME	1.55857e+06	1.53028e+06	1.89804e+06	3.02728e+06		109392			2.77169e+06	5.66448e+06	3.98399e+06	7.57809e+06
RL44_OCHTR			99794.2	108941					92252.6	102121	63062.3
RS4_CAEEL	745849	2.74588e+06	990023	1.17463e+06							55780.9
NDK_CAPAN	2.21498e+06	3.66186e+06	2.71961e+06	3.18445e+06					107148	179792	36043.8	319666
SYMM_ARATH						694143
CH601_VIBPA					535739	238991	575317	248844
WECC_SALTY					1.07979e+06	1.2027e+06	3.45059e+06	1.6118e+06
GYRB_VIBCH						236596	326612	145004
RL10_VIBCH					562985	124163		250203
RL9_VIBCH					681209	129948	370683
MOAC_VIBCH					13199.8
DLDH_VIBCH			216629	174602	3.74815e+06	442554	451596	706147
AROK_VIBCH		386307		418009		899070	897470	1.65094e+06
RPOZ_VIBCH	93672.4				1.11659e+06	547208	996424	1.83389e+06
EFG_NEIMB						465046
ATPB_NEIMA	9.83882e+06	6.4004e+06	7.06979e+06	1.83098e+06	679208	2.46763e+06	3.2303e+06	4.07566e+06	7.68952e+06	5.59646e+06	4.90455e+06	5.811e+06
Y423_PSEAE					347638
ACNA_PSEAE						419914	339502	123472
TIG_PSEAE					26949.5
ETFB_PSEAE					210457
RS1_PSEAE					996817
KAD_PSEAE						2.35091e+06	6.70492e+06	4.25762e+06
RS3_PSEAE					2.58898e+06
RL2_PSEAE					213004
EFG1_PSEAE					899594
RL13_PSEAE					544485
RL25_PSEAE					1.52865e+06
PNP_PSEAE					331822
RL9_PSEAE					324562
RL61_ARATH	205414	1.20607e+06	671572	592696						59471.8	23094.8	48096.7
LEU1_BUCUN					392104	222682	486785	213580
ERA_PASMU							477081
ACCA_PASMU						177720	387308	155486
RL17_PASMU					3.72256e+06	1.35794e+06	2.71241e+06	1.1507e+06
RL6_PASMU					325142	115348	336576	283550			228410
RL12_NEUCR	321045	884147	434713	824165
CH10_WIGBR	641668		654200	116118	1.83709e+06	1.05655e+06	1.50408e+06	1.60487e+06
FTSZ_SODGL	394027	458448	832323	190743	1.95403e+06	2.13207e+06	3.94971e+06	2.22092e+06
HUTU_RHILO						467882
RPOC_CLOAB			232490		607328	168913	284622	160401
EF1A_COCIM		418056		289807
RS14_CANAX	1.61176e+06	2.8501e+06	1.6062e+06	1.11235e+06						67893.2		234875
RL14_DROVI	1.34493e+06	1.99149e+06	1.99519e+06	3.219e+06					3.43566e+06	3.50566e+06	2.39577e+06	4.88527e+06
KCMF1_DROME				6745.28								22989.7
FAXC_DROME				270518		45240.6		158405	281951	840791	89328.4	256107
LUXS_PROMI			202443	184587	689039	541166	373562	428383
KRT35_HUMAN						254255	1.68001e+06	530923
2ABD_MOUSE	347290	265971	389203	310637	20573	66441	58866.6	195870	375775	534083	456436	693394
TPH1_XENLA	578087	1.12132e+06	1.56728e+06	1.16536e+06				75503.1	402629	634503	322191	506503
VATB1_MOUSE									270456		184482	283356
SECA_SALTY						177924
SDHA_SALTY	736979	239248	294418	178417	4.30153e+06	1.46164e+06	2.87023e+06	838819	85589.2		163592	72441.7
SDHB_SALTY		74400.8	144377	235225	949107	1.35839e+06	3.15144e+06	1.62779e+06		35627.7	37393.9	57985
TOLB_SALTY					101440		158153
MUKE_SALTY					557492	229181	809070	296057
PTA_SALTY						126871	347320
PNP_SALTY					820970	229935	886451	410418
ACSA_SALTY							455123
RS18_SALTY	161752		2.29058e+06	1.41487e+06	1.35618e+06	1.14959e+07	1.35862e+07	1.16441e+07
RS12_YERPE			295850	300630	1.65169e+06	1.38016e+06	1.9136e+06	947808
EFG_YERPE			155121	342640	2.36815e+06	1.0893e+06	1.41677e+06	1.41349e+06			63625.6
EFTU1_YERPE					5.75044e+06	798106	2.31141e+06	1.11821e+06
RPOA_YERPE	1.21227e+06	1.05791e+06	2.85416e+06	1.01792e+06	6.60149e+06	6.16964e+06	1.58708e+07	5.39384e+06	56341.2	55966.8	223768	93810.9
CH10_YERPE	1.42547e+06	661462	1.74969e+06	986713	278941	3.16886e+06	4.75996e+06	2.82717e+06	82083	90754.5	265363	178467
RS2_YERPE	369884				7.70714e+06	3.11732e+06	6.87614e+06	4.21758e+06	115602		82515.2
PYRH_YERPE						279155	451803	217355
ACCA_YERPE					2.53283e+06	760297	1.14523e+06	1.0741e+06			61796.4
OMPA_YERPE	359981		234774	167558		2.85993e+06	1.0921e+07	2.37756e+06
KPRS_YERPE	161796	396865	950052	1.28838e+06	6.20081e+06	6.31642e+06	1.14428e+07	6.77359e+06	84763.4		95712.5
SYY_YERPE			168808		361195	176140	414367	205278
GLYA_YERPE					695752	114005	162363
GSA_YERPE						420585	1.60843e+06	708695
RL27_YERPE			264911	614713	221636	2.53451e+06	1.7653e+06	2.08461e+06
EFTU2_YERPE						68532.6
GLMS_YERPE						60872	211811
ATPA_YERPE					244816	396676	1.06534e+06
CARB_SALTI					512142	121041	239584	90477.2
KPYK1_SALTI	538718	523002	1.10791e+06	431749	800842	376799	717983	354687
DHE4_SALTI						515074	1.3195e+06	712406
RS11_SALTI	881323	1.26253e+06	4.28574e+06	2.08635e+06	6.529e+06	7.12854e+06	1.27429e+07	6.39622e+06		462637
ATPB_BRUME	165641	40507.4	55553.6	17943.1
FUMC_RALN1			480103	303652	886948	428821	340838	511554
ASPA_ECO57	1.04602e+06	1.26397e+06	3.14149e+06	1.85984e+06	2.20146e+06	1.08458e+06	1.65761e+06	1.29743e+06
FCTA_ECO57					2.027e+06	1.19037e+06	3.09255e+06	902379		257438	233089
ILVD_ECO57					523993	167938	443526
DEAD_ECO57		49073.5	172769		690311	206113	807446	355245
OBG_ECO57						127695	392516	147049
ACCC_ECO57	120715	237184	654913	309258	1.20765e+06	1.28567e+06	2.21269e+06	1.3839e+06
DAPD_ECO57					205023	88688.1	269752	97270.8
PUF68_DROME	95456.2	61304.8	49640.7	157209				19319.7	241697	378683	168792	374226
RS23_DROME	1.72102e+06	2.40492e+06	3.59776e+06	4.65555e+06	160801	260964	169086	461210	2.87599e+06	2.46534e+06	1.16103e+06	3.10187e+06
CALM_STRIE	1.039e+06	1.42189e+06	555349	524116	593591	289644	606744	721704	1.49485e+06	1.92232e+06	2.06428e+06	1.36886e+06
ATPB_XANCP					356916	325160	773606	422231
EFTU1_XANCP								64195.3
H42_TALFU	1.04731e+06	1.03723e+06	1.27089e+06	412660					777520		943663
CH60_BUCTS					64495.5
CH60_CHLTE	3.44459e+06	3.42886e+06	1.88403e+06	983344	419120	538058	751962	496187	2.46127e+06	2.14054e+06	1.94433e+06	941877
CYSK_BUCAP						98132	166701	104207
H2B_ROSNE									30918.8		42498.7	64052.9
H2B_DROYA	1.50638e+07	1.20614e+07	1.36188e+07	1.32839e+07	788643	935775	1.14204e+06	3.40267e+06	1.95341e+07	1.55198e+07	1.57666e+07	2.51663e+07
GSHB_ECOL6		90290.3			401052	206093	276656	250713
DHAS_ECOL6					349064	117579	346224	257452
RL11_SHEON	233341				323154	2.01271e+06	4.47502e+06	1.84903e+06	113480
RL29_VIBVU					94524	49536.2	196642	65277.9
LEXA_VIBVU			61419.2	53552.6	268103	147419	171405	182842
TKT1_VIBVU		881040	2.16906e+06	912709	8.52519e+06	3.46635e+06	8.32209e+06	1.76374e+06
NUSA_BUCBP			271057		1.21905e+06	355332	689466	381816
HUTU_PSEPK							321667
RS2_PSESM					1.11862e+06	1.1499e+06
HUTU_VIBPA					217506	357128	709122	173841
EF2_NAUCC		429865	125250	42118.1
PRS7_DICDI			189073						189930	210897	231629	375127
CUCIN_ORYSJ		4.73868e+06	2.95086e+06	2.40209e+06		10078.5				209241	121767	51784.7
FUR_SHIFL					250214	399981	996999	268917
MDH_SHIFL					1.22343e+06	338950	763371	847313
RL1_SHIFL	1.78703e+06	1.32351e+06	4.77258e+06	1.27826e+06	1.32031e+07	1.18529e+07	2.02808e+07	1.27106e+07	20822.8	7761.01	67055.5	11933.3
DNAK_SHIFL					1.09138e+06	1.44871e+06	2.59299e+06	1.74013e+06
EFTU_COXBU					587294	91797.1	33504.1	38745.3
HTPG_COXBU					1.30271e+06	385927	726998	290058
EFTU_ENTFA	1.65366e+06	1.36967e+06	3.17539e+06	1.2561e+06	2.4804e+06	827947	1.17254e+06	654566	113297	93658.3	163222	55869.2
RL18_ENTFA			17724.4
RL30_ENTFA	469506	279659	510610	182085
CSPD_BACAN						460339	297784
LYS1_MUSDO			131821								195920
GLMM_HAEDU					229807	91193.7	154608	80390.1
PCKA_HAEDU				89007.5	871641
RS9_HAEDU					2.17964e+06	2.2662e+06	2.98427e+06	3.09441e+06
RS10_HAEDU						346595	919081	551829
A2MG_BOVIN						161277	252908	259872	338233	229044	183732	242909
QCR9_NEUCR	549253	1.1826e+06	435362	487876							31928.8
HTPG_CHRVO			509249		1.04111e+06	294988	890038	404211
ATPA_PHOLL				79597.8	567466	246214	347914	265671
PCKA_PHOLL					2.20207e+06	2.49313e+06	5.52758e+06	2.55043e+06
RL1_PHOLL	31066.3	63415			1.54081e+06
RL7_PHOLL		237101	181001	315319	4.19337e+06	504172	3.16499e+06	2.69066e+06
DNAK_PHOLL	400090	380989	685728	140566	2.25328e+06	1.43502e+06	2.1077e+06	1.58787e+06
RS2_PHOLL	125606		211209				286207
EFTS_PHOLL		708699	111527	652407	9.7586e+06	3.36171e+06	5.29529e+06	5.4849e+06
BAMA_PHOLL					596327	1.03675e+06	1.45455e+06	424717
CLPB_PHOLL	617915	438338	1.1034e+06	928671	7.18268e+06	5.32757e+06	1.04511e+07	6.02855e+06		130810
SYQ_PHOLL					915618	250966	826744	250151
SUCC_PHOLL					4.3014e+06	1.42739e+06	4.16049e+06	1.50144e+06
GPMA_PHOLL					445305	126248	979368	471504
SYM_PHOLL						992121
PYRD_PHOLL			56885.3	10666.4		100954	107390	52713.8
KPRS_PHOLL					210775	960807	2.46631e+06	1.00785e+06
FUMC_PHOLL			250735		1.59411e+06	1.14499e+06	512691	54277.2
SYFB_PHOLL						218299	335027	168150
RL35_PHOLL			166799	149395	1.19462e+06	669244	927551	193890
ACKA_PHOLL					453588
PDXJ_PHOLL					368373	269730	713395	148125
LEU3_PHOLL					171658	635975	843784	477683
HTPG_PHOLL						235942	683031	240717
RS9_PHOLL	150974	84741.3	134272		110892	3.6838e+06	6.25865e+06	3.46855e+06
RL21_PHOLL			175442		1.62875e+06	2.46529e+06	3.8976e+06	1.9498e+06
F16PA_PHOLL					187326	224548		251661
RS6_PHOLL	199529		153442	217053	195407	510387	3.36512e+06	1.84454e+06
RS5_PHOLL	1.336e+06	241404	2.71105e+06	1.36485e+06	4.27261e+06	7.43507e+06	1.21673e+07	6.36047e+06			162229
RL18_PHOLL	129827				41957.8	152045	819829	588538
RS8_PHOLL				116395	616297	456322	607813	855781	138503	101436
RL5_PHOLL					1.87471e+06
RL24_PHOLL	197353	75636.2	1.18531e+06	624862	2.39848e+06	1.14716e+06	1.34807e+06	1.33491e+06			221555
RS17_PHOLL					1.49674e+06	412355	1.29003e+06	255428
RS3_PHOLL	721658	199218	1.0182e+06	254545	5.25533e+06	3.24257e+06	5.70077e+06	3.31801e+06
RL22_PHOLL					1.06272e+06	1.92239e+06	4.20061e+06	1.83431e+06
RS19_PHOLL							14145.3	16273.8
RL2_PHOLL	485114	364939	995747	820672	5.99292e+06	4.49956e+06	9.17495e+06	5.93757e+06
RL23_PHOLL					2.19272e+06	332219	1.19776e+06	1.46948e+06
GLPK_PHOLL	226918	298190	1.21677e+06	60953.7	465321	815939	1.41129e+06	579917		27137.5	46960.5
TPIS_PHOLL					540529	190023		210449
GPDA_PHOLL					82403.5	173843	685739	261338
PURA2_PHOLL	62183.3	171586	539140	216731	1.12379e+06	417587	755508	283383
EFG_WOLSU						167281
GSHB_PHOLL					1.23895e+06
PABP2_DROME	1.70482e+06	1.5179e+06	444881	145343		249929		333308	1.24959e+06	1.61429e+06	875951	1.36803e+06
DHX15_DROME		43827.4	107076	49087.1		31287.5		34151.6	124846	156410	190727	285502
ARC2_DROME	1.13046e+06	434088	1.21471e+06	761906				124642	607618		636569
CLPB_SALTY					722659
PTA_YERPE	27669.3	20859.2	60114.2	19886.8	203596	44513.1	117442
RL6_YERPE						164006	882998	37534
RL30_YERPE	874631	178731	240837	172945	2.8267e+06	3.15548e+06	4.81981e+06	3.81306e+06
H4_DROTE	3.25467e+06	2.47088e+06	4.91839e+06	3.50774e+06	1.04479e+06	523652	1.14362e+06	1.73117e+06	7.69806e+06	4.77109e+06	1.16673e+07	1.11061e+07
RETN_BOVIN				68350.3	68641.3	185271	483949
RL30_ASHGO	2.52889e+06	3.41872e+06	1.94317e+06	398429					158456	366491
CLPB_YERPE	397200	697969	1.79294e+06	441884	1.58113e+06	1.99625e+06	2.31402e+06	1.70696e+06			24913.6
RS15A_DROYA	5.1477e+06	5.70855e+06	1.17343e+07	6.70069e+06	180919	829690	401732	1.23572e+06	5.42266e+06	6.9441e+06	6.75874e+06	7.03797e+06
ANXA2_CANLF					7167.97	44218.5	167793	128719
KRA32_SHEEP					818589	627930	1.89217e+06	1.04707e+06
KR111_CAPHI				67111.7	2.99755e+06	2.16424e+06	8.03765e+06	785220
RS28_PIG	1.90864e+06	2.23729e+06	1.18426e+06	1.01521e+06						69485.8		130414
H2A_PENVA	4.55397e+06	4.2548e+06	1.81551e+06	4.46686e+06	769174	615730	555790	1.1163e+06	8.30918e+06	7.98618e+06	7.00335e+06	9.93941e+06
EFTS_PHOPR					525930
K2C1_RAT	790115	1.37502e+06	894636	811133		979177	1.17023e+06	964519	1.40303e+06	1.03433e+06		878414
SUCC_ACIAD						426235	680123	298138
RNPH_PECAS					463764	403425	617266	398237
UBIE_PECAS	113557		353588		296458	191221	506765
RPOC_PECAS	261011	458112	931826	510674	2.61919e+06	3.99231e+06	1.05708e+07	4.71461e+06			27766.1
RF2_PECAS			172971			108487	257060
RRF_PECAS						2.62306e+06	5.98517e+06	3.56768e+06
TIG_PECAS		216440	432484	552170	873011	2.46488e+06	5.03225e+06	3.57577e+06		64762.5	282445	269442
IF3_PECAS					488405		749939
PEPT_PECAS					31148.7		126232
IF1_PECAS					471472			287611
ISPF_PECAS							159488	72258.8
RS13_PECAS	13586.7	459353		81022.2	3.15846e+06	340105	408643	290155		126985
RL16_PECAS	1.30911e+06	664024	1.24742e+06	281086	1.61008e+07	9.20819e+06	1.42906e+07	8.27893e+06
IPK1_KLULA								73827.6	206249	98646.4	192026	95687.7
GSHR_YARLI							264796
TBA8_RAT	774644	633208	576122						835912	858470	1.00364e+06	1.03115e+06
K1C39_HUMAN						45468	152913
KAD_YERPS	23979.5		100822	394833	2.49168e+06	3.75441e+06	7.01538e+06	3.47475e+06				30873.1
CH60_MANSM		777804	42385.9	507956	3.45015e+06	657446	3.24566e+06	692588	31024.6	144967	93482.1	32500.1
SYE_MANSM		88549.9	291078	45978	421741	189167	618649	141949
PRPS2_XENTR	358871	521853	792981	1.1386e+06					564607	624510	434313	560027
HSPB1_PIG							469134	428432
ACTS_PONAB	1.85954e+07	2.04157e+07	2.20224e+07	1.34769e+07	3.54214e+06	5.67715e+06	3.70391e+06	5.42224e+06	7.09119e+06	4.07541e+06	8.80405e+06	7.35327e+06
UB2D3_PONAB		318968	831552	1.0971e+06						442214		496677
EFTU_IDILO	493150	478567	1.37898e+06	960922	4.12957e+06	2.34547e+06	3.0647e+06	1.31585e+06		32182.5	231492	160436
EFP_SALPA	627286	679983	1.76374e+06	859225	4.55051e+06	2.88174e+06	5.54023e+06	3.1114e+06	35753.4	35023.2	37989
RS4_SALPA						1.16813e+06	524284	1.31618e+06
ENO_SALPA			252832			522350	1.41407e+06	890528
TAL1_SALPA					90765.5	441674	767170	481538
RS2_SALPA		195338			2.74207e+06	854032	2.33283e+06	999875
SUCC_SALPA						1.07183e+06	1.31452e+06	1.40249e+06
CH60_AROAE						892014
ATPA_AROAE						344247
XPT1_CRYNJ					706998
PNP_ALIF1					100469	62832.4
NDK_PSEAE					285500
USHA_YERE8							437585
AGP_PRORE					739428	261724	462036	385547
PAL_PASMU	206407		236270	122721	2.36864e+06	919954	2.1127e+06	1.06433e+06
SUCD_PSEAE					1.52107e+06
EFP_HAEI8		90675.7			1.96475e+06	1.00867e+06	1.32526e+06	1.0371e+06
RL9_HAEI8					1.15821e+06	364781	444330	464593
EFTU1_HAEI8					328503	163727	428005	220137
METK_COLP3					74393
GUAA_COLP3			35818.6		752083	439290	1.00757e+06					250176
RS9_COLP3	1.32064e+06	514916	925974	49506.9	2.01729e+07	9.15398e+06	2.3634e+07	1.34612e+07			33713.3
RS14_SHISS	217507				1.40599e+06	1.04873e+06	2.42166e+06	821482
RS19_SHISS					3.95609e+06	1.10213e+06	2.83227e+06	1.19656e+06
ITIH4_BOVIN						36058.1			116886
K2C71_HUMAN								570709
EFTU_THIDA	3.17909e+06	3.50875e+06		2.82311e+06	706062	8.14171e+06	7.50193e+06	849522			227579
RL14_THIDA						1.5733e+06	4.47102e+06	2.64494e+06
CO9_BOVIN				218396	293961	488301	3.91837e+06	541822	3.24161e+06	939308	606188	476997
DHRS6_XENLA						399122		385591
EFTU_PSEPF					131361
HSLU_PSET1					568829	318252	780197	406082
NUBCD_GEOMG	4.19324e+06	4.40306e+06	4.92919e+06	3.61815e+06	288183	864415		787733	2.62471e+06	2.20818e+06	1.78497e+06	2.34974e+06
CH601_BURL3					100684	133088
APOD_BOVIN					1.49259e+06	493638	1.17711e+06	1.3054e+06	3.65262e+06	1.21469e+06	2.35117e+06	1.37484e+06
KAD_SHIDS	55157.2	43038.2	122469	21105.4	63587.6	127527	137955	99787.3
RS11_HYDCU						737123
RL13_HYDCU						38874.6
CO3_BOVIN									91673.1	17692.3	10829.2
PPID_ASPOR	118428	86812.3	58193.8	72519.8	2.87181e+06	1.45037e+06	6.29659e+06	2.04833e+06
RECA_RHORT		60941.4			719938	17999.4		25556.9
ATPB_MOOTA						183623
RPOB_SODGM					1.96339e+06	822295	1.95268e+06	1.21362e+06
RPOC_SODGM						114939	650276	29706.2
RAPZ_SODGM		38924.5			503568	247550	502863	173296
SYD_SODGM					943049	363796	1.16996e+06	562735
PGK_SODGM			368260	300423		90232.1
RS3_SODGM					448039	6.35866e+06	1.61957e+07	9.27743e+06
RL23_SODGM					258569		193556	149553
EFTU_SODGM	1.70446e+07	1.67768e+07	3.60671e+07	1.96399e+07	6.34562e+07	5.28078e+07	7.91935e+07	4.49294e+07	1.21516e+06	2.07258e+06	3.65101e+06	2.22763e+06
PCKA_SODGM						47199.3
RS4_BORA1						1.09037e+06
ATPB_NOVAD	322723	163769	418443	405693		1.27014e+06	1.62072e+06	988842
CDC42_DROPS	870490	625217	657910	397879	306611	127083	200206	303204	491875	526371	288132	250456
EIF3E_DROPS										351589	168406	351993
TRFL_CAPHI						343350	1.49223e+06	748980
SSRP1_DROPS	118425	198873	278094	143164		28980.3		31415.9	129665	190909	55155.5	85908.9
TBB1_GLOMM	5.29094e+07	3.62488e+07	4.06791e+07	4.3121e+07	2.75072e+06	5.20003e+06	3.76425e+06	1.11127e+07	4.70347e+07	5.36328e+07	4.10601e+07	6.0021e+07
MCM4_DROME	328671	162627	291750	418379				72969.9	733288	1.16384e+06	410126	688428
ADT_DROME	7.79377e+06	1.23425e+07	1.15941e+07	8.54872e+06	4.6819e+06	4.12527e+06	4.38304e+06	6.63183e+06	1.16656e+07	8.47923e+06	6.15051e+06	4.94056e+06
CAF1_DROME	98207.4	151302	171527	238253					474704	665838	396239	650104
RYR_DROME			20153.2
ATP5H_DROME	1.90034e+07	1.2343e+07	1.11747e+07	4.59193e+06	126773	2.21519e+06	1.80341e+06	2.30164e+06	1.39097e+07	7.27777e+06	8.08234e+06	9.41911e+06
RL26_TETTS	275201	529628	404337	286968						16985.4
RPOC_ALBFT			389783	155884	796540	479986	454683	373578
FABH_BAUCH						254796	623372	323212
IF2_BAUCH					200138	62461.1	170962	315496
ILEU_BOVIN					1.34561e+06	408423	1.41669e+06	895913
RL2_RUEST			115508			97483.2
RL7_CLOD6					142835
EFTU_CLOD6					342487	258235	126376	604469
DUS14_BOVIN					352432	120507	204998	275012
ACCD_PSEA6					365356	461365	957803
KRT81_BOVIN				434707	5.46424e+06	8.43925e+06	1.48591e+07	1.36852e+07			89151.9	100526
KT33B_HUMAN		1.01629e+06		134778	6.93944e+06	2.33853e+06	5.18071e+06	4.48384e+06		197390
PTH_SHEDO						46863.9	215182
RL2_CYTH3	184304		121229	128355		1.33498e+06	1.99714e+06	1.57794e+06
IMDH_YERPE						459855	1.52769e+06	543272
RL2_ALCBS						95592.4
1433S_BOVIN					504512	261923	954319	607505
GLT2_ORYSJ		217007	117403	257130				93586.1	228953	300728	151466	193077
RL9_SHEFN	694241	457066	208105	504502	5.09168e+06	2.98471e+06	5.48929e+06	4.74087e+06
RPOA_BUCCC	386068	338968	1.03212e+06	373183	155676	2.19141e+06	2.47897e+06	1.47004e+06	119518	144825	407957	180085
THIK_YARLI											19335.3
YCL2_ECO11					803314	189061	1.08232e+06	213845
RS13_DROME	598980	707132	388635	692545					776624	1.51531e+06	1.39958e+06	2.03768e+06
MRPA_PROMH						83945.5		67211.5
EFTU_PSEAB	107077	472359	762078	572209	1.26635e+07	8.73094e+06	2.2925e+06	2.10186e+06		151190
IDH_PSEAB					389211	149641	173415	141044
KRA61_SHEEP	16280			36781.1	576547	2.61813e+06	5.31467e+06	2.16564e+06
UVRD_HAEIN			48128.2	31083.1	96583.3	53010	180578	25669.8
RECA_XENBV		341333	926162	384603	1.25949e+06	1.38087e+06	2.91508e+06	1.34843e+06			58232.9
TRXR1_DROME	402261	544323	305339	543492	257369	278416	278244	255673	1.60496e+06	2.19382e+06	1.28288e+06	2.08937e+06
L259_DROME		360118	376159	421326					354337	757564	379425	28285.3
ACT5C_ANOGA	1.2128e+07	6.34126e+06	8.29666e+06	7.91013e+06	7.47476e+06	5.53271e+06	6.74325e+06	6.48849e+06	1.35145e+07	1.69509e+07	2.05036e+07	1.71139e+07
SCP2_YARLI					74024.4	110356	114065	244838	1.19013e+06	744712	666938	598551
KRT85_HUMAN		140398		416712	3.02978e+06	2.78786e+06	9.83856e+06	7.16851e+06		187812	78992.9	130645
PDP_GEOSE						121309
YFCS_ECOLI					470393	86563.4	754152	64799
YFCU_ECOLI						235334	976841	207871
ALAA_HAEIN					96307.9	60863.3	301324	74711.6
DNAK_AGGAC					457637	331946	423126	367309
UREG_YERPS			101657	55522.4	980013	1.44005e+06	2.60937e+06	1.28503e+06
PTNAB_SHIFL						608108	917431	584870
H3_STRDR							298126		78456	217752	513593	416879
ACT1_DIBDE	2.78533e+06	3.83976e+06	2.2289e+06	3.4764e+06	121160	751392		152157	1.00737e+06	481048	1.17471e+06	1.36212e+06
RL40_OPHHA	2.29568e+06	2.03926e+06	2.24191e+06	2.19153e+06	219652	107787			3.14854e+06	2.68235e+06	5.15393e+06	5.23534e+06
ARF1_LOCMI	5.72706e+06	4.05649e+06	5.71775e+06	4.50602e+06	299975	424957	426757	1.39777e+06	2.98178e+06	4.15902e+06	1.54045e+06	2.99219e+06
HSLU_PASMU					141863	139410	384567	109398
TKT2_PASMU				268259		997106	2.74955e+06	1.11647e+06
RS9_DROME	1.7372e+06	1.7378e+06	1.9413e+06	2.2206e+06				210432	6.54558e+06	3.76678e+06	6.11518e+06	4.96255e+06
VATL_HELVI	8.12981e+06	6.50157e+06	7.56884e+06	7.19897e+06	5.56569e+06	5.65346e+06	5.38143e+06	4.25502e+06	8.70864e+06	5.89125e+06	5.5926e+06	8.52527e+06
PRS8_MANSE												114269
MLC2_DROME	106377	42608.5			49443.6	29863.8			80172.8	73473.1	102177	82961.9
H2B4_CHLRE		160566	117143	43137.1
CTHL1_SHEEP							189694
SODM_YEREN		54953.1		60408.3	168442	2.91794e+06	6.79026e+06	3.9243e+06
ODO2_CUPNH						790359		134340
RS13_ANOGA	778323		683013	1.32524e+06								2.11576e+06
RS9_PODAS	1.09004e+06	1.57768e+06	779025	674229
F12AI_BOVIN						100170	252173
TPM4_DROME	1.47988e+06	892147	1.44295e+06	1.47975e+06				116130	587979	349598	1.19417e+06	318635
ATPB_KLULA		861150	546910	226349					25761.4	26574.5	37619.5	45166.4
RL4_MORMO	317708	318561	1.11272e+06	280284	402201	111456	226887	80027.1
PRS4_DROME		42438.5		120208				111964	331066	379774	500781	833607
RL23_DROME	848686	872616	994060	1.36313e+06	78477.8	51256.3	50230.2	347831	754667	1.30043e+06	1.4543e+06	2.02286e+06
RHO1_DROME	97781.5	82077.2	279337	308394		186804	265297	274913	321258
PRS7_XENLA	224989								122527	423420	123308	431493
ANXA1_BOVIN		40196.8		153070	1.46736e+06	511300	4.80944e+06	1.1761e+06
LON_ERWAM	182937	378249	593481	314258	2.57359e+06	855016	1.77793e+06	1.2595e+06
ACTZ_DROME	232643		223079	178226					141462	220814	169899	228626
ETTA_HAEIN			121129		803240	137012	448977
CPDB_HAEIN	621679	218219	845070	419073		192390	488306	523037
SERA_HAEIN					1.37478e+06	771600	966652	744972
DLDH_HAEIN						253000	427777	326784
PFLB_HAEIN	864649	1.41702e+06	2.50588e+06	1.65722e+06	513301	532846	553722	687651			430805
FABB_HAEIN							564877
PRC_SALTY					340425
PHHC_PSEAE					112982
H13_MOUSE							238541	267679
RECA_ACIAD		112304	104411	124025	511494	240979		346784
CATA_PROMI					677967	101422
FLIC1_PROMI	145917	299298	1.96351e+06	462599	104000	31660.3		233244
HPCC_ECOLX		121068				767634	1.97546e+06	200751
EUTM_SALTY	258915	510357	928320	302860	236934						89824.1
6PGD_CITAM					1.46206e+06	1.17795e+06	2.97728e+06	1.53444e+06
CYSP_SALTY	47040.6				167183	67267.4	228915	88256
QOR_SALTY					124072		50107.5
YHXD_BACSU		1.43372e+06	788190	614743
PDP_BACSU						112456
DEGQ_ECOLI	234722	285921	546961	169307	3.21169e+06	3.593e+06	4.93513e+06	2.50324e+06
RS19A_DROME	4.39453e+06	5.82207e+06	3.54403e+06	2.96459e+06						122195		151996
RS1_DICD3	2.61418e+06	3.72292e+06	1.1053e+07	5.24451e+06	2.40754e+07	1.88181e+07	3.14632e+07	2.09006e+07	116905	509466	1.64455e+06	146786
GLTI_ECOLI			17639.2	71193	4.16907e+06	1.02728e+06	3.46806e+06	869382				15853.8
LRP_SERMA			112778	110908	1.06636e+06	1.35902e+06	3.15154e+06	1.62392e+06
MODA_ECOLI					854357		531160	162839
ACNB_ECOLI					1.07104e+06	868533	2.37191e+06	1.11931e+06
K22E_HUMAN	977311	1.28994e+06	880026	786484	607249	408426	1.66004e+06	1.39135e+06	1.474e+06	1.01771e+06	122588	173604
K1C9_HUMAN					841620	176520	473446	26336.5
ATPA_DROME	3.19335e+06	1.53482e+06	2.45101e+06	1.96787e+06	219885	535076		248737	1.83329e+06	758364	508034	322008
H2B_ACRFO	66203.1				887827	140743	118103	1.29247e+06
TRYA3_LUCCU	248256	165255	701548	211661	680990	2.10556e+06	4.76e+06	4.35669e+06	568240	657537	648302	1.16031e+06
NUOF_SALTY					906841		201187
IF3_PROHU					50265.9	620839	578771	684549
EFTU_DEISP							177649
ANT3_SHEEP		91146.7		122308	1.37535e+06	510965	2.8419e+06	1.37678e+06	794371	247331	364756	102807
FDOG_ECOLI			245641		72768.2	429071	734921	236517
URE1_YEREN						431268	117850
RS2_DROME	2.42801e+06	5.00195e+06	7.43636e+06	8.92635e+06		85625.3		744126	7.52455e+06	1.00472e+07	8.23869e+06	1.32146e+07
COX2_DROSU	1.11221e+07	7.74734e+06	7.08288e+06	6.51938e+06	282378	812597	539850	457315	4.66029e+06	3.64741e+06	1.97468e+06	4.26654e+06
CLH_DROME	70501.9	38214.7	105333	52940.7					149897	172904	49021.1	249894
RS6_DROME									418583	698880	686879	901953
GLN1B_PROHU			107570	81873	331518	169664	847643	390514
S10A9_BOVIN						49189.6	320596	52990.5
SSB_PROMI			207903	140770	479144	1.24505e+06	1.84919e+06	1.5003e+06
EF1A_ONCVO			718107	1.63611e+06
OPDA_ECOLI					322527	125662	617499	157025
SAP_BOVIN					109592	67822.9	188638	123298	32552		44412.4	15722.2
ENO_SOLLC	66639.6	270624	130651	55386.8						67365.3		19226.8
NDUV1_BOVIN	249920	399319	604027	1.30839e+06					147890			100004
K2M3_SHEEP		583604	61045.5	921360	1.95252e+07	1.22438e+07	3.3591e+07	2.42524e+07	43973.9			79903.2
K1M2_SHEEP		1.55237e+06	238261	1.50525e+06	1.37964e+07	4.45492e+06	1.39408e+07	1.18704e+07		206120
LIVJ_CITFR					230765	53121.7	162998	58185.4
G3P_SEROD	233973	1.11585e+06	279443	222953	3.87552e+06	1.82722e+06	2.17457e+06	1.44859e+06	260925	477323	332833	219602
FDNG_ECOLI					132914	79235.5	110156
G3P_SERMA							405547
G3P_KLEAE	1.8895e+06	1.09135e+06	2.54108e+06	696345	2.32045e+06	3.53592e+06	5.6506e+06	4.1061e+06	206558	184130	589103	276651
OMPA_KLEPN			1.22054e+06			1.26667e+06	2.54529e+06	1.0436e+06
PPIB_ECOLI					450036	624303	1.29523e+06	1.11422e+06
DPPA_ECOLI	60045.3				4.6891e+06	1.60648e+06	4.8911e+06	1.67433e+06
PP2A_DROME										212443	154401	428519
PPSA_ECOLI					1.27555e+06	458122	761628
GYRB_PROMI			136666		507337	207040	142790	137331
KPYK2_ECOLI		257709	455857	225034	364506	177870	772105	194404
HBB_RANTA			22466	91532.5	78723.9	629088	1.72669e+06	1.87692e+06	299196	70105.6	40400	112446
FRDA_PROVU	818466	1.12529e+06	3.38616e+06	824200	1.8132e+06	533469	1.13423e+06	697407			44519.3
FRDB_PROVU	1.37348e+06	871391	2.48598e+06	1.02534e+06		707016	692472	484445
PPIA_SALTY					1.4224e+06	1.14055e+06	2.37257e+06	1.15165e+06
DDX17_DROME	331026	503197		742669
HNS_PROVU	2.55225e+06	1.6668e+06	1.99932e+06	619627	4.15652e+06	2.36419e+06	2.32248e+06	1.82175e+06
RL44_TRYBB		82843.1	145620
PTHP_KLEPN				65608.4		469829	865347	665161
ATPA_RAT	1.21072e+06	594624	808838	714282					570639	209285	135385	298854
RS27A_DROME	123921	238728	370915	426465					513685	607794	591514	625579
K2M2_SHEEP					779370	1.24112e+06	1.68168e+06	1.37976e+06
ALBU_SHEEP				29460.5	1.24125e+06	989024	1.92099e+06	1.25517e+06	5.74426e+06	6.71549e+06	3.88099e+06	4.74854e+06
RS1_PROSP	75341.7				3.0546e+06	876890	2.22864e+06	2.62395e+06
ARCA_PSEAE					1.16383e+06		102983
K1C10_HUMAN	1.50494e+06	1.39356e+06	674146	498954	1.98341e+06	694598	2.01596e+06	1.23453e+06	1.44425e+06	1.02932e+06	296780	317305
CYC_SARPE	3.12737e+06	2.93429e+06	867916	984760	165723	224531	549605	465844	2.47786e+06	1.3059e+06	1.5778e+06	1.5524e+06
A1AT_SHEEP		43684.3		12183.7	245788	129614	135092	107824	87906.3	39418.5
CO6A3_HUMAN								796459
PERM_MOUSE						299336	1.13185e+06	309145
ACT1_TETTH	582089	956336	517442	346327	204593				337660	518569	381288	426661
OMPA_SHIBL	5.54908e+06	4.28114e+06	1.56899e+07	9.54329e+06	1.36004e+07	2.53926e+07	2.5485e+07	1.27882e+07		76882.2		64487
FKBP_CRYNB	7.74917e+06	1.59773e+07	1.11255e+07	7.38838e+06						187937
NACB_CRYNB	2.47824e+06	3.905e+06	2.04323e+06	1.39131e+06						91400.7		116265
H2B_CRYNB	1.61321e+06	1.9499e+06	2.7416e+06	930573	75843.2	72680.9	208374	187412	190924	288036	497392	152204
RL40B_YEAST	2.19894e+06	2.07873e+06	649116	420432					155200	152266	203271
FNR_VIBCH			143419	105445	550998	226336	468557	324397
SUCD_ECO57	311426	356638	417094	117738	1.98378e+07	8.7695e+06	1.90204e+07	9.89014e+06
SRP54_ECO57		131209	163351		445155	184988	477825	229174
PSTS_SHIFL					3.89796e+06	624230	1.77957e+06	994871
RS1_SHIFL					41151.8	125649	438639	112477
RHO_SHIFL	143717	598891	973167	532247	4.51532e+06	1.94473e+06	4.7648e+06	1.94802e+06
ODP1_ECO57						178311	434951	139932
ODO2_ECO57	305490	356002	406745	349092	5.97537e+06	4.16575e+06	6.98293e+06	4.57627e+06
ODO1_ECO57						446273	1.21146e+06	448234
NUSA_SHIFL		237937	295182	311991	1.18987e+06	760041	856120	933762
MIND_SHIFL				248053	467745
USPA_SHISO				45691.1	413405	88048.6	559475	190568
CPXR_SHIFL						671230	1.3934e+06	719013
BCP_SHIFL					384652
AHPC_SHIFL					282465
IMDH_SHIFL					207181		171787	119028
CRP_SHIFL	208205		1.18489e+06	199088	3.20884e+06	1.57141e+06	3.90008e+06	2.61757e+06
SSPA_SHIFL	649470	566227	2.28379e+06	787160	7.95526e+06	3.46704e+06	5.04826e+06	4.68757e+06
GLRX4_SHIFL						791193	2.12759e+06	1.40577e+06
YCHF_SHIFL		86553.9				306303	1.00756e+06	425070
DKSA_SHIFL					1.34181e+06	803392	1.6944e+06	482124
ILVE_ECO57		203813			1.11538e+06	650290	933585	2.52972e+06				275805
ALF_SHIFL	670586	758532	2.25136e+06	1.49984e+06	7.62526e+06	2.62994e+06	5.42515e+06	3.54231e+06
THIO_SHIFL	2.28014e+06	1.91718e+06	580189	1.72124e+06	5.64247e+06	3.03325e+06	6.88131e+06	3.66571e+06	16101.4
OMPR_SHIFL					817538	456999	1.35416e+06	867591
NUSG_SALTI					746127	811056	2.0422e+06	725646
CSPC_SALTI	926005	1.01234e+06	1.74842e+06	1.1632e+06	2.55999e+06	2.05007e+06	367209	1.63444e+06	263178	254345	1.01091e+06	271164
MREB_SHIFL		217611	720225	69372.8	1.40508e+06	1.88658e+06	3.84774e+06	1.48308e+06
LPTB_SHIFL					195085	146734	265378	51794
ARCA_SHIFL	199320		489390		3.21297e+06	862958	2.75091e+06	1.93872e+06
DLDH_SHIFL	380814	308631	595346	466624	1.01408e+07	9.0396e+06	1.80755e+07	1.07506e+07
ALF1_ECOL6			131058		2.67181e+06	628371	4.28053e+06	421107	28860.9
CSPE_SHIFL	3.07979e+06	814160	5.10982e+06	1.51233e+06	9.51027e+06	7.35555e+06	1.23251e+07	9.74162e+06
PAL_SHIFL	208093	148203	202647	141149		46445.8	71711.2	78329.3
SODF_SALTI		438057	1.06861e+06		4.27629e+06	3.01106e+06	7.07295e+06	4.60719e+06
FABG_SALTI						353236	310724	469219
PT1_SALTI	190799	329289	816328	373654	1.80812e+06	993197	1.1837e+06	1.26363e+06		86245.4	4703.11
CYSK_SALTI						629736	296213	633849
GLPQ_ECOLI	44318.2		69588.6		96495.7		99115.5	55209.2
PFLB_ECOLI	938130	1.79668e+06	3.96579e+06	2.35062e+06	2.75174e+06	842019	957786	210445			35866.9
IDH_ECOLI		42011.3	32078.6	130222	8.92535e+06	5.57234e+06	9.59209e+06	5.87405e+06
FUMC_BACSU							99206.3
TPM1_DROME	2.90718e+06	1.53543e+06	2.01478e+06	520900	94464.3	341847	146223	79512.8	401944	318370	1.3161e+06	291099
TBA1_DROME	3.72481e+07	2.94644e+07	3.42678e+07	3.62906e+07	2.11143e+06	4.30031e+06	1.90242e+06	7.1358e+06	2.76324e+07	2.9637e+07	2.70349e+07	3.59858e+07
MYSA_DROME	1.8588e+06	975896	3.1492e+06	2.72329e+06	163574				328064	132104	341809	156311
DBHB_PSEAE			57425.3		1.77966e+06		100300
PERM_HUMAN		96692.8			1.8877e+06	2.67994e+06	7.59655e+06	4.3089e+06
APOD_HUMAN					142488	63625	122454		320025	170571	356598	154694
OMPA_SERMA	639265	894691	1.20825e+06	371175	923678	714299	1.60778e+06	277675
K2C1_HUMAN	1.77522e+06	4.02905e+06	2.34458e+06	1.82906e+06	4.11138e+06	3.84422e+06	6.57443e+06	3.80255e+06	4.48513e+06	2.49789e+06	813685	1.44576e+06
TOLC_ECOLI				214365	1.92112e+06	479158	1.57157e+06	1.04312e+06
CASA1_BOVIN		88283.8	134989				58389.2				90797.2
K2M1_SHEEP		1.98326e+06	608177	1.60833e+06	3.60792e+07	1.40617e+07	3.27575e+07	2.07762e+07	247787	307464	306335	411054
K1M1_SHEEP	54802	2.53732e+06	380387	3.68046e+06	9.05452e+07	3.65859e+07	8.87641e+07	6.21207e+07	76252.9	353175	577786	178549
CO1A1_BOVIN					45115.2	512633	132309	4.43943e+06
KRA34_SHEEP					326449
KRA3_CAPHI					176275	461007	1.45131e+06	548398
BPT1_BOVIN			108661		1.53629e+06	933910	2.71036e+06	540950	1.16475e+06	183087	175189
THRC_ECOLI						265635	769664	145423
TRYP_PIG	135577	299331	235897	599946	206859	140359			653127	196209	358601	246833
FRDA_ECOLI						62515.4	150869	64085.4
6PGD_ECOLI					708825
PAPS2_HUMAN		204465	467322	440184					282464
IF5A_CANAL	1.24246e+06	2.58519e+06	1.04288e+06	1.34001e+06				137745	157107	334979	241798
KRT36_HUMAN				108142	3.25139e+06	1.10632e+06	2.63885e+06	3.06296e+06
PGRP1_HUMAN					88807.9	262151	776874	120612
CATA_PSEAE					174205	84336	289456	256906
ALF_EDWI9	242852	280802	521706	464254	529303	461891	687664	200893
RAB6_DROME	573929	327382	290144	224657				190998	186084	205923		232359
CORO_SCHPO				436042	2.89777e+06	136711	2.78801e+06	1.1269e+06
RB11A_CAEEL	1.41873e+06	666127	871478	818842		247702	233529	527809	766928	1.31192e+06	725959	1.36081e+06
BIPA_SALTY			200320		486946	719491	1.5026e+06	533384
CDA1_BOMMO	1.04278e+06	1.09957e+06	1.00885e+06	665448					1.01981e+06	1.98359e+06	696670	2.05989e+06
SDHA_SERS3					101098	88476.8	115905	83829.3
RL1_PECCP	506426	280190	616453	415487	5.84764e+06	3.27597e+06	6.01184e+06	4.12596e+06
ILVC_PECCP			115680	103414	5.50363e+06	3.83362e+06	6.95204e+06	2.6477e+06
EFTS_EDWI9					103602		64441.2	71384.9
EFG_EDWI9	386629	221524	482572	654127	8.60006e+06	5.0028e+06	8.33683e+06	6.39201e+06
RS3_EDWI9			536574	95988.6		221353	1.50522e+06	200345
RECA_EDWI9	55322.4	272576	171981	266776	1.50958e+06	918967	1.60095e+06	659001		60081.3	52855.3
ATPB_EDWI9	53111.9	305360	112136	336886	2.13048e+06	4.61447e+06	3.35853e+06	1.69995e+06		182310
ATPG_EDWI9					1.00722e+06	147355	324551	229634
TIG_EDWI9					568887		595176	244811
RL13_EDWI9						312195	738440	286212
EFTU_HAMD5					312395	551829	1.00857e+06	521397
LCP82_DROME	231281	443658		413152							1.10936e+06
CO1A2_MACSX								165769
CO1A2_ORYAF								124363
DNAK_MACCJ						571880
ENO_GLAP5	161607	63462.2	79564.6	51981.9	2.42828e+06	1.55467e+06	2.85041e+06	2.2744e+06
ATPA_GLAP5	85379.9	128012		101735	1.72067e+06	1.62908e+06	2.91715e+06	1.82845e+06
RL1_SHEB2					2.65662e+06
HIS4_SHEB2							350788	110461
G3P_ESCF3	1.8641e+06	2.99282e+06	6.21982e+06	3.42545e+06	4.54863e+06	8.40465e+06	1.44369e+07	8.78279e+06	512505	392381	280949	170959
DNAK_ACIF2			119525	65094.6	684660	666869	615913		202008	278811	274298	685309
RL3_ALISL						98121.9
HPT_CAPIB							132223
RS6_KLEP3	568282	183640	350756	699864	1.10041e+07	5.61529e+06	8.88358e+06	4.25159e+06
RL9_KLEP3					966094	402719	486558	504425
HUTU_KLEP3					1.83511e+06	773386	2.90635e+06	895000
PFKA_KLEP3	106518	170732	139703	108335	447843	72100.3	268843	145201
METE_KLEP3						102619	145374
PYRD_KLEP3							195711	96156.6
RL19_KLEP3					303336	1.38618e+06	3.54211e+06	983677
SYFA_KLEP3					152215
RS13_KLEP3	60573.4	42992.1	143243	289738	1.48912e+06	3.80916e+06	7.79393e+06	3.0014e+06
PGRP1_BOSIN					617259	1.13801e+06	5.04667e+06	917475
ATP19_YARLI									26666.8
ENO_ALIFM						483437	1.3615e+06	644350
RS2_STRM5					42827.7			156384
RL1_STRM5					13496.8	54684.6	41972.1	115338
CH60_STRM5								150829
DNAK_ALTMD	183186				680995	2.12221e+06	3.0533e+06	2.05851e+06				260942
TMEDE_DROWI	506033	285746	426333	353554					255900	226790	246601	286457
DNAK_PROMH	3.42112e+06	3.16313e+06	7.31481e+06	3.05111e+06	1.59801e+07	8.47218e+06	1.12444e+07	9.84918e+06	144759	559252	153906	102665
TAL_PROMH		175867	903979	342075	2.36625e+06	497113	656284	467942		96562.9
AMPA_PROMH			51974.7		264339	599554	1.22627e+06	356976
RS2_PROMH	1.0437e+06	976174	2.11372e+06	1.02064e+06	8.73618e+06	4.56581e+06	7.21428e+06	4.02744e+06	89360.1		84227.3
EFTS_PROMH	2.05226e+06	1.63122e+06	6.74026e+06	1.55635e+06	5.0088e+06	1.85786e+06	2.89409e+06	2.64882e+06
IF2_PROMH					416881	235650	165238	192070
GLMM_PROMH	72471.4	304622	822896	327916	728111	923199	1.72425e+06	885214			22597.7
RL21_PROMH					38149.9	30620.5	27573.6	399213
MDH_PROMH	1.08326e+06	1.49325e+06	2.17436e+06	1.31676e+06	3.38004e+07	1.24397e+07	2.5893e+07	1.23433e+07	27318.8	47828	181541	65564.4
ARGR_PROMH							57635
F16PA_PROMH	66506.8		228307	87689.4	220090	247061	405122	176011
RL9_PROMH	866181	670309	2.73587e+06	1.55085e+06	3.47621e+06	3.01549e+06	4.81186e+06	3.71848e+06			130860
RS6_PROMH	825512	806649	2.90947e+06	1.30098e+06	3.54184e+06	1.80141e+06	1.72958e+06	1.14993e+06	278580		130519	347208
PURA_PROMH	66779	55425.3	145807	42779.4	143630	57142.4
FABZ_PROMH					2.32866e+06	223651		190595
SYP_PROMH			1.0294e+06	770026	119187	256211	438154	203511
KAD_PROMH	145670	142577	268016	55349.5	169762	271972	466832	222601			22772.7
RL17_PROMH		874568	3.08483e+06	1.50913e+06	3.36694e+06	1.72191e+06	2.57647e+06	1.07497e+06
RS4_PROMH	883509	632168	1.94842e+06	738751	9.53039e+06	2.57691e+06	4.95994e+06	3.88168e+06
RL15_PROMH	525911	408668	1.52558e+06	626054	2.48736e+06	4.51077e+06	5.93724e+06	5.0702e+06
RL30_PROMH	562602	309957	1.92967e+06	1.16575e+06	226566	1.52584e+06	1.44339e+06	774545
RL6_PROMH	4.25805e+06	2.4462e+06	1.06453e+07	3.23474e+06	1.08021e+07	1.25915e+07	1.99366e+07	1.13504e+07	124917	134946	476395	151292
RS8_PROMH		1.10686e+06	1.04913e+06	689235	1.61529e+07	2.68157e+06	3.15974e+06	4.2778e+06	197304	703619	259672	131809
RS14_PROMH	62908.7	60656.2	93673.5	62644.6	169563	259531	132378	403308
RL5_PROMH	2.80881e+06	1.69794e+06	7.81966e+06	3.35944e+06	1.96031e+07	1.18284e+07	1.86447e+07	1.10456e+07			280140
RL14_PROMH	390188	369835	865741	264738	4.22706e+06	807362	5.65747e+06	4.86542e+06
RL16_PROMH	652862	471769	1.42016e+06	742810	871216	1.37818e+06	1.55346e+06	1.57719e+06			453174
RL22_PROMH	533900	247098	534572	331230	280518	720770	241194
RS19_PROMH	1.70891e+06	1.72016e+06	2.71429e+06	1.47288e+06	1.71684e+07	4.83001e+06	9.8547e+06	7.59317e+06		116812	240220
RL2_PROMH	224906	247854	541706	412280	183661	587268	546902	377247
RL4_PROMH	1.26014e+06	635927	1.68879e+06	468774	2.23934e+06	1.76954e+06	1.98069e+06	1.61534e+06	113958	40326.5	271152
RL3_PROMH	604549	672473	2.36543e+06	1.12392e+06	1.54885e+06	1.28641e+06	1.07269e+06	648174
METK_PROMH		202402	637799	199321	1.51734e+06	1.65153e+06	2.69127e+06	1.33072e+06
LEU1_PROMH						87286.3	292041
HSLV_PROMH			188261				154218
HSLU_PROMH			408712		608050	2.78965e+06	3.57331e+06	2.84861e+06		564797
TPIS_PROMH	1.04065e+06	1.41786e+06	3.52101e+06	1.2934e+06	3.77666e+06	2.10251e+06	5.43159e+06	2.61239e+06			106186	38016
SECB_PROMH	316703	255591	653448	36392.1	759698	495257	376659	341434
TDH_PROMH					274460	135208	123308
RL28_PROMH	1.95325e+06	634829	1.95326e+06	337851	3.86554e+06	2.04631e+06	3.01295e+06	3.06856e+06
FDHE_PROMH							11547
RPIA_PROMH		455693	1.54428e+06	619310		1.31583e+06	1.91353e+06	1.71878e+06
GCSP_PROMH			97729.4	30331.3
SYK_PROMH	381923	355579	759505	415592	467321	206536	329441	207163
ATPB_PROMH	2.92975e+06	2.64976e+06	5.05717e+06	2.38442e+06	1.68325e+07	1.98856e+07	2.93332e+07	1.62256e+07	109328	126601	77806.5
ATPA_PROMH	358315	497001	1.19877e+06	392029	2.04544e+06	3.74868e+06	5.00606e+06	3.92977e+06		75577.4
ASNA_PROMH		51856.1			565452	206814	739713	336014
AROB_PROMH					23780
MQO_PROMH						547794	2.26353e+06	597288
GRPE_PROMH			318696	156166	499900	1.98565e+06	6.85353e+06	4.36026e+06
GRCA_PROMH	115286	101890	200764	94794	112619	69201
PCKA_PROMH			7831.65		677754	359715		481707
GLYA_PROMH					1.23996e+06	1.06995e+06	1.32455e+06	1.32046e+06
ISCS_PROMH					1.85191e+06	159676	301423
DER_PROMH	57767.4	41158.6	137936	16767.1	134311	94668.7	141325	50022
NFUA_PROMH			138287		349520	193743	339888	153078
ACKA_PROMH		159103	493396	303130	384860	309127	517009
SYGB_PROMH					119769
RS7_PROMH	2.99701e+06	1.90771e+06	5.68882e+06	1.66217e+06	5.8077e+06	9.95749e+06	1.42199e+07	1.10723e+07	42671.2		81995.5
EFG_PROMH	4.52554e+06	5.20371e+06	1.4333e+07	7.84956e+06	2.24922e+07	1.8149e+07	3.31586e+07	2.15996e+07	49741.9		777469	71799.8
RL11_PROMH	1.6805e+06	2.55944e+06	4.88072e+06	2.08697e+06	2.29365e+07	7.69004e+06	1.20082e+07	7.48736e+06
RL1_PROMH	2.58043e+06	1.61011e+06	5.61213e+06	2.01648e+06	1.17807e+07	6.27953e+06	9.89492e+06	6.93404e+06
RL10_PROMH	1.80627e+06	942719	3.33681e+06	1.29661e+06	2.58556e+06	3.729e+06	7.05683e+06	4.40558e+06		48427.1
RL7_PROMH	4.92985e+06	2.66267e+06	6.53656e+06	4.14546e+06	1.61691e+07	7.46809e+06	1.7012e+07	1.06453e+07	17511.1	19380.3	59336.9	22057.2
RPOB_PROMH	178318	90694.2	635925	161129	1.06462e+06	1.17518e+06	3.54454e+06	2.02719e+06
UPP_PROMH	55984.6	207459	345502	146008	1.15817e+06	1.04691e+06	1.65249e+06	918893
PUR7_PROMH			34563		132973	508265	965086	477087
RS9_PROMH	2.08015e+06	779489	4.5822e+06	1.90855e+06	8.08634e+06	3.10908e+06	7.1075e+06	5.18071e+06
RL13_PROMH	1.97765e+06	1.23126e+06	3.99937e+06	1.88177e+06	4.76823e+06	6.52129e+06	1.34984e+07	8.80976e+06
CH60_PROMH	8.99969e+06	1.0603e+07	2.03668e+07	9.75335e+06	5.3292e+07	2.43149e+07	4.44047e+07	2.7357e+07	179788	201742	485527	326624
DEOC_PROMH	1.25234e+06	695006	1.65792e+06	332027	1.17014e+06	476579	1.06856e+06	420897
TYPH_PROMH	351052	302809	957321	284243	1.45218e+06	612763	1.25979e+06	675608			24488
DEOB_PROMH	1.55657e+06	2.56897e+06	6.56291e+06	2.20296e+06	637205	1.15374e+06	1.11942e+06	1.1296e+06			274069
DEOD_PROMH	1.59597e+06	1.357e+06	3.3888e+06	1.19516e+06	1.49485e+06	1.03469e+06	2.0023e+06	1.14075e+06
SYS_PROMH					506456			152382
RL19_PROMH	475588	390651	1.29205e+06	1.45469e+06	211747	3.09196e+06	6.37005e+06	4.12755e+06	91678.9		195168	231034
RS16_PROMH		73081.6	690009	267215	218211	3.11531e+06	804961	4.27243e+06
XGPT_PROMH		128568	249540	178884	1.29565e+06	475390	807405	366194
PGK_PROMH	4.26814e+06	1.84779e+06	1.22432e+07	2.76749e+06	8.04854e+06	6.21581e+06	1.22676e+07	6.9314e+06	107895		173134
ENO_PROMH	5.31137e+06	4.89663e+06	1.33501e+07	6.68933e+06	1.19342e+07	7.90726e+06	1.0873e+07	7.67164e+06	55904	45404.8	225165
PYRG_PROMH		197388	486014	244702	567027	315215	627448	546668
APT_PROMH	138291	178258	426421	183770	191200	339627	812862	249365
CLPX_PROMH			229305		124011	120843
CLPP_PROMH						172494
TIG_PROMH	2.17288e+06	1.44483e+06	7.53046e+06	2.42812e+06	6.57885e+06	4.0102e+06	4.52927e+06	3.88722e+06			25250.5	24813.1
RISB_PROMH		190879	86560		1.72173e+06	2.27393e+06	2.47448e+06	1.86708e+06
Y1113_PROMH		104748		82675.2	577571	301509	390042	336632
SYD_PROMH	326889	527966	1.31134e+06	502456	1.18027e+06	2.62509e+06	3.91569e+06	2.00052e+06
ARNA_PROMH	209486	473947	1.96752e+06	875480	3.23955e+06	2.58162e+06	5.74877e+06	1.69647e+06			45004	20943.2
ARNB_PROMH					389766	139722	83347.9	343128
IHFA_PROMH	1.32271e+06	939054	2.15331e+06	760219	5.96972e+06	5.67533e+06	9.66145e+06	6.64493e+06
SYFA_PROMH	45543.8						96296.7
RL20_PROMH	484782	246882	1.00947e+06	206894	514731	2.11559e+06	1.76699e+06	4.15173e+06				191324
ACP_PROMH	677886	772704	1.92877e+06	1.26568e+06	2.25047e+06	3.00986e+06	3.01215e+06	4.55942e+06			121603
RL32_PROMH	71820		493200		110498		784340	232925
RL25_PROMH	605018	567384	1.05391e+06	341390	899023	1.03611e+06	969092	553327	126686	106351	313951
APHA_PROMH	662470	405982	1.53893e+06	493228	228035	118543	394726	224867
SERC_PROMH	51474.4	71566.7	209248	94881.9		326524	1.45146e+06	486911
CDD_PROMH	192347	289004	808952	233250	125111		155264	107173
MAO1_PROMH	68382.5		227251	55248.1	1.11977e+06	651398	1.51221e+06	514412
GPMA_PROMH	1.9878e+06	1.20627e+06	4.19526e+06	1.135e+06	5.27298e+06	2.83095e+06	5.02794e+06	2.83234e+06
SUCC_PROMH	237303	824954	379869	729052	7.51285e+06	7.56995e+06	1.24242e+07	6.16252e+06	160859	172120	426709	138985
CH60_CUPTR					680171	553592	937568	188568
CH60_CELJU						960337
RL2_ACTP7	7202.5					50080.1	141246	46002.2
RL6_ERWT9					302845
RL4_ERWT9	548368	241768	240172	81495.5	9.94427e+06	3.91187e+06	9.23499e+06	4.80604e+06
DNAK_ERWT9						427824	545343	219757
RRF_ERWT9					1.22617e+06	352777	629782	302620
ATPA_ERWT9					2.03268e+06	1.25184e+06	1.58929e+06	1.34197e+06
SUCC_ERWT9	91772	71093.6	325471	834429	620536	3.43213e+06	4.62835e+06	4.13008e+06			50922.5	150931
IF2_LEPCP	333888
KRT35_SHEEP		195168		2.21127e+06	6.47647e+06	3.09334e+06	9.68452e+06	5.33276e+06
RL11_ALKOO				287775	4.69318e+06		5.2885e+06	2.38632e+06	25962.1		21803.2
HUTH_ALKOO						195961
BAMA_SERP5						205480	672922	291777
Y1887_SERP5					310575	107904	750442	208334
Y1197_SERP5						1.09828e+06	2.62428e+06	1.41865e+06
RISB_SERP5	500865	213679	118266	82635.2	1.58558e+06	1.0118e+06	1.63117e+06	695729
RS16_SERP5					167070
DNAK_SERP5	570354	905728	2.67046e+06	880527	1.50668e+06	3.72614e+06	4.59016e+06	4.04582e+06
FOLD_PSELT				755992					742719		884555	642934
EFTU_VIBC1	205622		333831	269284	417097		428291
CH60_CROS8	620902	675827	947995	1.13361e+06	7.37108e+06	6.75504e+06	1.69979e+07	6.2166e+06	62292	342769	996235
CH10_CROS8	3.00254e+06	3.64373e+06	9.16939e+06	3.2629e+06	2.1823e+07	1.08778e+07	1.01903e+07	1.14806e+07		88257.3	141981
PNP_CROS8				230874	769334	2.4588e+06	3.45359e+06	2.88266e+06
LUXS_CAMJD					457812	223608		395038
RL10_MARMS	345174		522204			416979	842839	870468
ILVC_ACTSZ		84812.4			675723	522875	1.3171e+06	672553
EFG_ACTSZ		133164	286480								79450.6
UPP_KLEP7						107294		99634.5
HTPG_KLEP7	231236	465095	1.15582e+06	221463	3.09413e+06	1.57957e+06	2.97821e+06	2.03061e+06
AMPA_JANMA						479069	1.0467e+06	312596
ILVC_JANMA					510410
EFTU_NITSB						528447
EFTU_CLOB8						96157.1	122663	316364
NUOD_RHIWR	2.30559e+06	1.49307e+06	1.85462e+06	871273		125702		229012	946233	432389		387016
EFTU_DICNV	257646	547800	2.52626e+06	1.11745e+06	5.28062e+06	3.64277e+06	4.50097e+06	399203		31489.5
RL33_DICNV						1.28673e+06
ATPG_SHEPC						146799	112852
ATPB_ENT38						448541	534344	406294
PCKA_ENT38						200733	432330	188654
RL3_ENT38	261647	224363	710139	251876	2.75164e+06	4.38302e+06	7.08735e+06	3.62047e+06
RL5_ENT38					1.19176e+06	1.08172e+06	1.27794e+06	869205
CH10_ENT38			144780	242308	107713	2.26291e+06	2.62494e+06	2.34909e+06
EFTU_ENT38		241650	974514	284245	283653	1.45893e+06	5.94982e+06	123915
HLDD_ENT38		139847	201278	119941	631510	413305	1.073e+06	501562
ATPA_AERS4					816484	301716	687130	536683
HIS1_AERS4					167273	268365	760265	285361
KRT83_BOVIN	196713	2.27607e+06	1.832e+06	8.60658e+06	5.97643e+07	3.79092e+07	1.10214e+08	7.84444e+07		132850	943130	1.84999e+06
CH60_SHELP	337198	340710	179510	248883	2.60746e+06	783596	1.05962e+06	620101
ATPB_HALHL							778274	622874
AMPA_POLNA						304393
RL5_PSYIN			111499			708378	93384.9
RL1_PSYIN					42778.4	360341
RS2_PSYIN					218050	325122	685901	907036
MDH_SHEAM	270687	93471.8	478423	415231	1.54013e+06	1.36743e+06	1.95882e+06	2.60335e+06			66994.3
ILVC_AZOSB						611702
ATPB_YERE8						2.4558e+06	4.02578e+06	3.66127e+06
PGK_YERE8					3.90599e+06	1.04459e+06	2.90569e+06	1.6365e+06
Y3092_YERE8			44368.5		216266	150187	342326	414725
DEOB_YERE8					487266	140950	401159	165512
MDH_YERE8					1.51976e+06	1.1487e+06	1.43676e+06	988741
TPIS_YERE8			152743	30506.8	716422	135663	894587	222599
EFTU_PELPD	128559	208973	61048.1	140445	2.85175e+06	857427	2.43162e+06	832932
ENO_CLONN					368829
RL7_AERHH	696859	1.69737e+06	503518	1.44912e+06	8.79254e+06	3.99251e+06	5.32641e+06	7.48254e+06	125621	420441	272324	287909
EFG_AERHH						682355
SYN_AERHH			198645		508116	900145	1.69951e+06	1.21136e+06
OMPF_PROMI	800638	501211	2.24955e+06	722127	1.9398e+06	1.0941e+06	2.80085e+06	665005			120226
RS28B_CANAL	229514					85516.6			439559	639280	469070	563956
RS15_CANAL	5.86842e+06	9.68977e+06	4.66768e+06	1.90269e+06		41585.9		29871.1	365944	875296	444037	487051
KAI8131048.1	356434	406115	533760	276165		60607.2	53508.9	46414.1	263168	159692	106421	97104.2
KAI8131046.1	405552	399063	386742	500478				131701	451733	508166	159014	334054
KAI8131040.1	1.15305e+07	5.22589e+06	5.63645e+06	3.83251e+06	188223	216269	255003	169261	4.48912e+06	2.20294e+06	3.47548e+06	2.40374e+06
KAI8131031.1	1.90536e+06	1.45007e+06	2.83599e+06	4.65514e+06					40904.2		25971.4	70039.6
KAI8131013.1	2.95222e+06	1.74948e+06	2.72557e+06	2.70438e+06	37291.2	92029.8	41179.9	344918	3.05398e+06	4.60877e+06	2.9452e+06	4.54653e+06
KAI8130987.1	3.61975e+06	2.27706e+06	2.4073e+06	1.60795e+06	51909.3	337371	213960	219100	1.33732e+06	884583	899066	943931
KAI8130984.1	2.24918e+06	1.68916e+06	1.29601e+06	1.17351e+06		226011		260905	1.85944e+06	2.33327e+06	1.96989e+06	3.28995e+06
KAI8130972.1	334602	220582	227335	1.02575e+06		130959		196557	834062	1.61495e+06	393396	1.0761e+06
KAI8130968.1		188554	129806	160394				842502	444690	556698	505978	805132
KAI8130962.1	77673.8	691978		282960	904674	1.17614e+06	968413	767063	3.26876e+06	4.22139e+06	3.31697e+06	1.23417e+06
KAI8130929.1		105186							133117	122930	85583.7	198428
KAI8130922.1	136707	223266	1.02143e+06	1.21949e+06				186800	461917	543529	472664	1.02623e+06
KAI8130919.1	144924	195177	42008.6	42348.3					135403	60221.7	71417.8	186530
KAI8130918.1	33840.5								32618.1	17542.2	37566.4
KAI8130900.1	483983	377223	485684	251206		179575	268345	234495	643454	407362	732528	1.03845e+06
KAI8130875.1									230251	252866	172321	342440
KAI8130874.1	645044								180917	334086		435073
KAI8130869.1	9.73104e+06	4.71461e+06	4.57628e+06	1.70125e+06	133794	467283	180348	783153	3.63809e+06	1.52859e+06	2.03157e+06	1.85745e+06
KAI8130867.1	2.60536e+06	1.65151e+06	2.18402e+06	1.52128e+06		181608		254770	1.83614e+06	972573	903985	803328
KAI8130824.1	891359	1.48187e+06	871820	1.24724e+06	129866	128352			1.66156e+06	3.14075e+06	1.60423e+06	2.31012e+06
KAI8130821.1	826573	1.04809e+06	677646	224251		331085	283252	1.05834e+06	1.04063e+06	587966	857792	567181
KAI8130811.1	1.16775e+07	8.4043e+06	4.87845e+06	3.39501e+06	156912	533351	619744	642667	5.55218e+06	4.96764e+06	2.94692e+06	4.68039e+06
KAI8130792.1	71673.3	142553	758059	569171		28369.2	43020.9		158159	156720	153642	561503
KAI8130784.1	466527	251003	740726	367307					226052	255511	104024	241626
KAI8130783.1	779183	567596	1.02916e+06	753220	30495.4	106131	38889.8	210833	510052	814485	300175	471999
KAI8130768.1	492449	164729	367499	75281.4					304310	196495	168743	486830
KAI8130748.1	1.49869e+06	791134	1.17386e+06	909537	38409			74386.2	1.29812e+06	2.18914e+06	985418	2.43595e+06
KAI8130733.1	4.67938e+06	5.46539e+06	7.26609e+06	4.17744e+06	38978.9	330146	99094.1	744319	4.64366e+06	3.17263e+06	1.90301e+06	4.17419e+06
KAI8130725.1	8.73083e+06	6.81035e+06	7.91592e+06	5.41042e+06	126550	805446	400239	1.1123e+06	3.84376e+06	3.46152e+06	3.81645e+06	2.77713e+06
KAI8130697.1	968509	797585	881289				91444.5	156435	806761	697131	846939	697878
KAI8130696.1				425082			127076	159085	1.03037e+06	1.1108e+06	3.31474e+06	1.83771e+06
KAI8130673.1	622749	867092	1.06546e+06	565121		190457	477378	399655	3.84453e+06	3.31633e+06	2.91529e+06	2.56983e+06
KAI8130670.1	597166	193349	438546	59130.3	99491.9	82112.8	49816	184851	1.34648e+06	857421	1.27553e+06	775881
KAI8130669.1	6.21479e+06	6.99564e+06	1.08608e+07	1.35754e+07	2.75026e+06	2.44294e+06	3.76467e+06	3.6873e+06	1.16192e+07	1.34093e+07	1.14836e+07	1.09503e+07
KAI8130632.1	6.55734e+06	4.29451e+06	5.34895e+06	3.60389e+06	226423	241996	87524.4	188413	3.84634e+06	2.64853e+06	1.89509e+06	2.17475e+06
KAI8130629.1	5.08376e+06	5.15122e+06	5.16429e+06	1.03007e+07		381946		886247	8.16339e+06	1.09161e+07	7.54443e+06	1.18279e+07
KAI8130623.1	1.74023e+06	1.78546e+06	1.83533e+06	2.00333e+06	244265	539415	336067	565707	2.32093e+06	2.85067e+06	1.7434e+06	2.46397e+06
KAI8130615.1					2.3889e+06	4.65672e+06	9.0311e+06	3.14596e+06	3.06766e+06	3.56201e+06	3.80225e+06	657429
KAI8130613.1	1.16399e+06	1.51149e+06	1.47567e+06	2.46597e+06					749077	4.27819e+06	2.73178e+06	3.97492e+06
KAI8130599.1	1.53361e+06	811090	612850	559742	524192	371860	633915	546762	2.83019e+06	2.60968e+06	3.88215e+06	2.83482e+06
KAI8130597.1	212887	606673	830508	920547				88444.8	570561	889945	672157	1.00751e+06
KAI8130594.1	1.22281e+06	1.1467e+06	894336	465128					526660	457951	422306	857346
KAI8130579.1	261454	830839	787507	1.53201e+06					1.6984e+06	2.94653e+06	1.88519e+06	3.6636e+06
KAI8130576.1	1.79367e+07	1.23926e+07	1.69084e+07	5.96206e+06	913577	1.03243e+06	987624	1.35697e+06	1.3612e+07	5.09049e+06	2.54754e+06	6.23219e+06
KAI8130574.1	691710	466316	708284	247869				70219.9	116960	117352	53648.6	99239.7
KAI8130573.1	1.05802e+06	549628	909166	391235					437738	338738	249271	287011
KAI8130569.1	5.14071e+06	4.76733e+06	4.4053e+06	3.4092e+06	1.39141e+06	936164	755931	584479	8.70768e+06	5.05958e+06	4.36816e+06	2.86846e+06
KAI8130561.1	275977	337744	306142	1.21845e+06				65242.6	2.25129e+06	4.07704e+06	2.27609e+06	3.29183e+06
KAI8130541.1	644580	986434	836479	547423					580922		139501	119421
KAI8130535.1		167361		74652.4						155629	1.95929e+06	702419
KAI8130502.1	222111	159486	129250	58580.7					112593	195264		173746
KAI8130498.1						68228.3	118704		222836	250344	443064	208181
KAI8130487.1	5.18766e+06	4.74222e+06	3.40135e+06	5.16392e+06	670054	735522	799719	511996	8.56767e+06	1.36145e+07	1.01312e+07	1.45357e+07
KAI8130478.1	594731	1.072e+06	407648	1.49065e+06		286744			1.0209e+06	2.99341e+06	1.72787e+06	3.00534e+06
KAI8130461.1						105084	96566.4
KAI8130439.1	995853	722823	386758	99428.7	145817	137225	158120	194926	214210	169204	306482	69981.2
KAI8130431.1	5.17304e+06	1.07298e+07	1.11703e+07	7.70676e+06	199827	339366	296236	613016	1.32238e+06	1.42763e+06	2.53038e+06	572650
KAI8130427.1	339240	156791	153949									184469
KAI8130424.1	970121	627281	1.09155e+06	791893					169712	997676	137667	1.14462e+06
KAI8130408.1										54312.7		75636.4
KAI8130404.1	80280.6	77538	104752	57125.9		64511.8			146605	162721	86919.1	84099.3
KAI8130389.1	1.68845e+07	1.45303e+07	7.03786e+06	6.75968e+06		739071	418811	800898	1.06825e+07	2.84333e+06	8.72925e+06	7.04655e+06
KAI8130383.1			100307						143393	226086	190808	345424
KAI8130338.1	177902	464903	447372	35402.9		39394.9	48724.4	53941.9	443073	157525	127278	164481
KAI8130304.1	753327	557108	217799	35277.9	87073.5	85728.1	70177.4		496937	93114.3	229515	84711
KAI8130302.1	373006	200128	415103	75636.2		240741			927935	294000	461936	536044
KAI8130285.1	1.69785e+06	710338	3.08472e+06	1.48e+06	64925.8				488229	1.3239e+06	755090	847942
KAI8130274.1	3.74654e+07	3.50057e+07	3.11055e+07	2.9924e+07	744259	2.96731e+06	336413	2.70771e+06	5.6959e+06	2.67028e+06	6.91871e+06	3.04793e+06
KAI8130257.1	1.55012e+06	1.31906e+06	1.93219e+06	2.02426e+06					1.00974e+06	2.16095e+06	1.58342e+06	1.69291e+06
KAI8130256.1	7.95673e+06	5.61341e+06	6.48937e+06	3.53344e+06	40858.5	196702	85394	261703	3.3796e+06	3.6252e+06	2.56693e+06	3.04205e+06
KAI8130231.1	283041	337672	414247	162070		18606.7		49363.8	82877.8	66064.3	68936.5	54326.4
KAI8130219.1	1.23784e+07	6.59724e+06	6.26976e+06	2.44994e+06	592789	381469	90532.2	633769	4.3566e+06	980252	914882	829496
KAI8130191.1	3.0688e+07	1.75415e+07	1.61604e+07	8.36974e+06	1.56034e+06	3.32899e+06	2.07252e+06	3.59757e+06	1.16055e+07	8.74019e+06	9.21416e+06	1.00238e+07
KAI8130189.1	330828	566833	1.18727e+06	1.14324e+06	11389.8				572198	686863	428805	1.36454e+06
KAI8130181.1	1.19751e+08	8.11213e+07	1.09585e+08	6.01076e+07	1.20033e+07	1.54966e+07	8.70441e+06	1.43501e+07	7.21851e+07	4.37885e+07	4.70932e+07	3.60312e+07
KAI8130177.1	949105	865164	1.78601e+06	1.55611e+06	93185.6	199508	50004.5	383468	2.42811e+06	3.09805e+06	2.23994e+06	3.16238e+06
KAI8130160.1	2.28249e+06	1.27998e+06	1.55011e+06	809561		88723.8			294967	399187	267876	205737
KAI8130156.1	1.3199e+06	1.31645e+06	1.58208e+06	1.43275e+06		35566.5		43926.4	1.03511e+06	1.43436e+06	1.02314e+06	1.38564e+06
KAI8130154.1	195688		175195	89933.2	106185	56902.4			221737	275618	205238	144775
KAI8130106.1	1.16907e+07	1.02381e+07	1.35185e+07	8.3845e+06	6.02583e+06	4.88988e+06	6.07563e+06	4.83615e+06	9.3108e+06	9.38971e+06	8.88838e+06	7.90465e+06
KAI8130105.1	7.50258e+07	5.46765e+07	8.45734e+07	5.22317e+07	4.01738e+07	3.36105e+07	3.82651e+07	3.64214e+07	4.52872e+07	3.44414e+07	4.17252e+07	3.66405e+07
KAI8130104.1	1.68982e+06	1.71967e+06	1.76432e+06	1.63095e+06				44355.1	118213			63234.2
KAI8130091.1	1.1597e+06	1.57311e+06	1.66131e+06	1.17113e+06		83259		83291.5	642558	918320	336161	746239
KAI8130076.1	112943	50856.3	72639.1	41296.7		10466.3			48832	71593.3	52008.5	98865.4
KAI8130072.1	185866	128962	253293	138222					185640	342697	199331	73895.5
KAI8130067.1	173138	198078	234857	83016.1	34557.9	70442.3	58419.4	57322.8	267956	293080	191363	201983
KAI8130064.1	699995	1.04215e+06	836295	519271				57527.4	406416	831894	369084	478417
KAI8130022.1	379343	2.03675e+06	549800	1.04996e+06	3.65651e+07	4.11524e+07	4.22338e+07	4.29919e+07	3.60125e+07	3.92023e+07	4.65499e+07	2.39354e+07
KAI8130020.1	220718	232691	350589	310639		58478.8		177250	258148	287712	178008	246363
KAI8130013.1	541796	421523	268419	102664	43359.1	33638.2		16938.7	382022	553142	270242	461603
KAI8129993.1	2.23091e+07	2.1094e+07	1.22256e+07	8.4295e+06	1.73942e+06	4.79346e+06	4.67151e+06	4.62754e+06	9.89185e+06	8.07049e+06	8.3328e+06	3.70483e+06
KAI8129989.1	1.66754e+06	1.26547e+06	2.05502e+06	1.54751e+06	331223	221828	106613	983147	1.36114e+07	2.49452e+06	4.98609e+06	2.96833e+06
KAI8129966.1	696338	689927	596695	787913	116279	148408		116481	1.08952e+06	1.49689e+06	583943	1.30605e+06
KAI8129934.1	5.71811e+06	5.19916e+06	2.41193e+06	1.84243e+06	124898	167089	129795	246743	1.02939e+06	1.07855e+06	1.01203e+06	986815
KAI8129928.1	770208	1.5388e+06	559202	2.45851e+06	165225	290583	109603	1.10438e+06	3.11526e+06	5.35269e+06	2.80098e+06	5.07623e+06
KAI8129904.1	408046	355285	465716	590600					319943	652193	707200	955436
KAI8129898.1	465736	152948	351911					120169	283866	313447	144094	247964
KAI8129895.1	8.04272e+06	4.027e+06	8.13886e+06	5.70185e+06	198447	1.1658e+06	550838	1.24177e+06	5.45188e+06	4.83723e+06	3.34006e+06	6.82836e+06
KAI8129889.1									128335	190514	137469	190492
KAI8129886.1	1.67483e+06	652789	2.51769e+06	817693	37042.4				762645	1.30806e+06	251865	1.17411e+06
KAI8129871.1	1.51979e+06	1.87948e+06	2.48279e+06	3.2557e+06	777215	440487	206430	984336	4.16514e+06	6.14031e+06	4.23377e+06	6.21503e+06
KAI8129861.1	593823	588919	549007	420247	29180.8	10640.7		144987	773485	1.06297e+06	947595	1.40733e+06
KAI8129858.1	2.39721e+06	2.73445e+06	1.81639e+06	1.65478e+06		421728	64650.4	168796	1.27199e+06	1.18368e+06	1.19959e+06	1.46137e+06
KAI8129834.1		149187	331521	448504					630896	300784	608024	36606.5
KAI8129805.1						107376	117025	116390	233674	241651	364424	120777
KAI8129743.1												96553.2
KAI8129719.1	896930	1.52564e+06	1.92441e+06	3.00067e+06		94042.9	65711.7	201808	2.53525e+06	3.25491e+06	2.89768e+06	3.00647e+06
KAI8129717.1	1.3502e+06	1.39175e+06	1.25515e+06	851421				81826	1.42384e+06	1.16265e+06	1.32625e+06	1.32302e+06
KAI8129710.1	312105	357657	124142	38032.9			43858.2	48881.2	100375	67849.3
KAI8129695.1	833238	531454	603452	161948		30010				62308	57369.8	70398.2
KAI8129681.1	5.79185e+06	4.31536e+06	3.88724e+06	1.32447e+06	79377	385890	106210	155023	2.54242e+06	1.81274e+06	1.57642e+06	1.65413e+06
KAI8129664.1	332475	949377	508917	892385				334811	957262	1.55524e+06	1.04606e+06	1.64622e+06
KAI8129663.1	1.49319e+07	7.53228e+06	2.6005e+06	3.1183e+06	310641	644169	80241.5	374574	1.04439e+07	1.82788e+06	7.03735e+06	4.90254e+06
KAI8129646.1	538130	433001	284070	245975					156696	170222		183064
KAI8129645.1	6.46052e+06	7.77606e+06	8.6279e+06	5.38422e+06	55954.2	295034	285118	269065	3.596e+06	2.71054e+06	1.82692e+06	3.87723e+06
KAI8129622.1												17703.4
KAI8129610.1	102194	327771	396105	397510					450491	416900	271418	362360
KAI8129608.1						72960		49839.4
KAI8129602.1	164778	384537	285422	450734					270143	1.0932e+06	232845	437503
KAI8129573.1	4.37093e+06	1.55773e+06	1.49893e+06	1.35719e+06							2.11213e+06
KAI8129555.1	3.41689e+06	2.73563e+06	3.57458e+06	1.40776e+06	1.55639e+06	617872	964564	1.17696e+06	922126	1.1645e+06	1.30665e+06	1.49087e+06
KAI8129543.1	119242	143860	98811.2						62063.8	56420.2		57021.9
KAI8129530.1	1.43571e+06	1.99393e+06	1.97105e+06	3.62306e+06	556912	701837	568248	787662	8.35353e+06	1.0458e+07	7.41634e+06	1.06177e+07
KAI8129526.1	1.69403e+07	1.96283e+07	8.72709e+06	1.63924e+07	3.28005e+06	8.39902e+06	6.20633e+06	9.29531e+06	1.88878e+07	2.02051e+07	1.69243e+07	1.7929e+07
KAI8129485.1	2.07276e+06	2.15619e+06	1.97321e+06	3.15613e+06	41595.1	110257		338184	3.09304e+06	4.14726e+06	2.42652e+06	3.6854e+06
KAI8129472.1	307700	292649	208271	302966					380773	484768	136128	178848
KAI8129464.1								31173.5	114780	150026	123969	117996
KAI8129412.1	1.08726e+06	1.28066e+06	1.6214e+06	1.36024e+06	172777	201826	214524	649853	1.2135e+06	1.90913e+06	727446	1.07402e+06
KAI8129410.1	2.22328e+06	1.63247e+06	351193	457772		197672	115811	243662	460257	582015	1.39334e+06	1.63645e+06
KAI8129403.1	3.1216e+06	2.06315e+06	2.02391e+06	534814		145092			745341	134909	164861	264494
KAI8129380.1	2.0846e+07	9.73421e+06	1.31573e+07	5.65312e+06	1.28024e+06	1.13563e+06	750890	1.90971e+06	1.70468e+07	4.52912e+06	6.56287e+06	5.9965e+06
KAI8129361.1	717453	798812	1.2546e+06	1.61592e+06		271609	181205	533749	2.78356e+06	4.59124e+06	3.19304e+06	5.89304e+06
KAI8129353.1	94156.8	35769.4		67408.9					327153	570748	384517	591086
KAI8129335.1	2.4753e+07	1.8193e+07	2.30537e+07	3.1548e+07	2.50105e+06	4.82525e+06	3.2536e+06	6.13557e+06	3.09126e+07	3.77162e+07	3.52046e+07	4.33427e+07
KAI8129321.1			248080	461452	62266.8	54077.5		41060.2	288258	460161	188135	361419
KAI8129318.1	465558	580508	467000	341807					385653	728299	405701	868308
KAI8129309.1	40995.8	38734.2	63285.1
KAI8129299.1	361802	343586	427023	572394					299047	865301	609514	1.08881e+06
KAI8129298.1	555913	692736	440618	184949	570429	266793	702433	577830	585441	367767	290321	259622
KAI8129297.1	1.35293e+07	7.77825e+06	9.46415e+06	4.4158e+06	753582	1.65585e+06	1.18646e+06	1.85403e+06	1.00584e+07	5.08972e+06	6.50257e+06	5.43552e+06
KAI8129291.1	6.20496e+06	5.68335e+06	5.8507e+06	3.58884e+06	373127	802157	426270	588253	5.18805e+06	3.45426e+06	3.83705e+06	4.69976e+06
KAI8129279.1	1.66042e+06	523313	1.11813e+06	346596		220711			143164	114575	311029
KAI8129268.1	1.046e+07	6.52326e+06	5.33585e+06	3.50139e+06	273978	770731	849186	678559	4.75171e+06	3.60547e+06	4.26734e+06	5.87402e+06
KAI8129267.1	1.77291e+06	1.94104e+06	2.7181e+06	2.46463e+06		58702.7			1.30965e+06	1.67481e+06	1.39919e+06	1.55295e+06
KAI8129257.1	219229	86939.1	148255	55946.7
KAI8129255.1	291077	277966	301574						356878	193793		248128
KAI8129192.1	5.05296e+06	1.65943e+06	1.37575e+06	335792	156770	213227	110614	44669.7	2.13235e+06	506498	485088	185469
KAI8129180.1	2.18137e+06	2.1123e+06	3.21877e+06	2.36532e+06	165774	164463	100373	379985	3.8606e+06	6.26566e+06	2.86507e+06	5.47376e+06
KAI8129175.1	4.48349e+06	3.53944e+06	2.37669e+06	1.77111e+06		147304		184333	1.99369e+06	2.42829e+06	2.2833e+06	3.53125e+06
KAI8129153.1	7.63669e+06	4.50905e+06	3.76611e+06	1.51651e+06	328216	1.57545e+06	1.28567e+06	1.38014e+06	5.38925e+06	3.03487e+06	2.05796e+06	2.78742e+06
KAI8129151.1	216291	655901	1.34189e+06					14724.4	430548		499698	329987
KAI8129144.1	4.80729e+06	2.56798e+06	5.33897e+06	1.98808e+06	676576	457898	236648	496171	1.82944e+06	991674	810688	1.00828e+06
KAI8129140.1									17372.9
KAI8129124.1	501251	917505	763027	2.049e+06	78339.1			86128.9	2.92027e+06	5.2103e+06	2.37786e+06	6.33649e+06
KAI8129113.1	150534	209600	142944	228648	43805.3	170240	96495.9	468057	758136	1.27137e+06	645824	1.46762e+06
KAI8129109.1	7.28656e+06	4.78025e+06	4.82972e+06	2.15028e+06	169869	368199	104697	212512	2.16402e+06	1.47227e+06	1.6436e+06	950699
KAI8129078.1	5.44408e+06	5.70825e+06	5.1602e+06	3.5505e+06		1.06889e+06	358316	505777	4.27351e+06	2.1542e+06	1.31939e+06	1.47382e+06
KAI8129064.1	935974	927444	1.52782e+06	844181	153022	154119	45028.3	242610	1.08511e+06	416106	535427	671370
KAI8129054.1	5.8092e+06	9.44267e+06	1.23566e+07	8.68571e+06	635469	528598	252803	690736	7.78274e+06	9.92295e+06	7.86835e+06	8.71087e+06
KAI8129027.1	121088	113237	137365	108094					94022.8	136686	132905	95334.9
KAI8129019.1	466028	194692	365675	198594					137522
KAI8128971.1				104598					276425	696278	701076	507581
KAI8128968.1	907010	327252	754318	2.43542e+06				278206	2.64737e+06	6.30805e+06	4.27438e+06	6.6787e+06
KAI8128956.1	3.04997e+06	2.65813e+06	2.5178e+06	3.91948e+06	168996	326770	247623	1.00991e+06	3.52581e+06	6.18413e+06	4.67677e+06	7.7272e+06
KAI8128944.1					2.41021e+06	2.42245e+06	2.11005e+06	3.57563e+06
KAI8128943.1	4.3942e+06	8.84181e+06	3.59333e+06	2.50205e+06	7.43416e+07	6.35343e+07	6.01213e+07	9.17807e+07	1.80076e+07	1.67094e+07	1.91711e+07	1.687e+07
KAI8128941.1	7.56666e+06	4.75531e+06	6.28668e+06	2.77151e+06	2.3818e+06	3.5694e+06	1.99346e+06	891114	1.28146e+07	6.94425e+06	5.30989e+06	5.32321e+06
KAI8128934.1	1.11016e+06	1.17333e+06	1.10931e+06	3.18096e+06	396345	428453	369784	993684	4.34967e+06	5.6052e+06	5.28422e+06	6.55851e+06
KAI8128906.1			160454	53813.2						489447	207643	358482
KAI8128897.1	1.39301e+07	4.10177e+06	1.37614e+07	3.37454e+06		2.84542e+06	1.61293e+06	2.50478e+06	1.5451e+07	6.62244e+06	9.46172e+06	1.0157e+07
KAI8128890.1												98824.5
KAI8128888.1	2.9226e+06	1.0461e+06	1.86617e+06	1.22021e+06		213059	263917	73172.1	2.05601e+06	1.07741e+06	1.72401e+06	1.56572e+06
KAI8128874.1	677346	700348	448346	1.29244e+06					1.66881e+06	1.77805e+06	1.17843e+06	1.24009e+06
KAI8128871.1				98583.5					149520	194497	77957.9	106067
KAI8128823.1	528314	251006	496822	267910		551842	846961	390029	556310	292021	219583	373794
KAI8128814.1	537559	401885	172415	186964					168779	195961		159329
KAI8128811.1	1.51425e+06	1.2686e+06	1.6741e+06	2.50935e+06		154518	145733	481006	3.13441e+06	4.24681e+06	3.09541e+06	4.58611e+06
KAI8128809.1	303138	205923	238174	263112					399491	463106	337893	667167
KAI8128806.1	157295	103482	235467	37070.1					46735.6	73308.9	45455.2	28911.7
KAI8128801.1		287249	97229.5	139108				97190.9	551992	721223	300469	668999
KAI8128785.1	8.16574e+06	8.01836e+06	1.19034e+07	4.59644e+06	4.13231e+06	2.48899e+06	3.45317e+06	3.28339e+06	8.73648e+06	5.56406e+06	6.32285e+06	6.17987e+06
KAI8128741.1	340217			100351		73685.8		278464	335778	781568	309993	626115
KAI8128723.1	2.65822e+06	2.43203e+06	1.71987e+06	1.35498e+06	208233			358312	1.95432e+06	1.2986e+06	1.7132e+06	786671
KAI8128699.1	346698	579436	855467	180908
KAI8128693.1		445011	581086	1.68712e+06		98951.6	139293	692229	1.29378e+06	3.60109e+06	2.48536e+06	4.24843e+06
KAI8128689.1	1.84141e+06	1.18606e+06	1.71826e+06	729385		146253		411261	2.0405e+06	2.67743e+06	1.74372e+06	2.01337e+06
KAI8128682.1			115577	81447.1
KAI8128652.1	1.00659e+06	339666	634771	264789					20576.4	60140.8	20012.3
KAI8128649.1	239001		63647	559287					1.10684e+06	1.93358e+06	819008	2.15644e+06
KAI8128600.1	96707.8	132496	172149	103857	116380	96519.6	108906	68488.5	256251	268097	216155	167561
KAI8128587.1	902420	939967	335268	318384					190586
KAI8128569.1		260704	328056	560191					467878	474118	110821	180462
KAI8128553.1	40559.8	926928	1.45079e+06	388549	13560.8			32646.3	197209	332176	177417	44971.7
KAI8128530.1		202412		62860.5
KAI8128529.1	16458.8								9505.37	16800.5
KAI8128511.1	1.10103e+06	829007	455463		62818.2	97557.5		12527.7	557215	627985	305924	395944
KAI8128483.1	332816	124762	313328	43655.2					54345.7		37640.2	94534.5
KAI8128478.1			258149		43535.6	69604.2			2.78052e+06	80422.7	1.20016e+06	1.67476e+06
KAI8128464.1	81549.3	84676.9	192167	52866.2		19817.8		27174.4	66944.7	72481.1	77113.1	40470.1
KAI8128440.1	657513	28875.8	466397	248911					656934	814417	1.19111e+06	688990
KAI8128378.1				54217.7					95993.7	239136	172615	177516
KAI8128367.1	59960.4	51556.3	431468	251360		8603.27			488332	600315	376173	603057
KAI8128358.1	478875	225737	363070	443069					446810	630223	629562	952545
KAI8128354.1			278708	130106		900579	189129	309674	800560	411958	593138	673848
KAI8128353.1		46450.4	108140	67315.1					55008.8	69904.7	57310.9	74163
KAI8128327.1	35962.3	23507.5	29590.2	37483.5					65012.9	123783	53236.6	118445
KAI8128324.1	203618	80641.6	198134	162477		18183.1			114895	214020	220045	224599
KAI8128318.1	100453	53666.9	97380.9	79489.2				31689.1	84819.6	42817.6	31208.9	25026.3
KAI8128310.1	4.64034e+06	4.21593e+06	5.61851e+06	9.25877e+06		158391	25457.1	430678	7.13561e+06	8.42705e+06	8.41898e+06	1.1836e+07
KAI8128289.1		97348	463931	228707	68196.9	47265.8		139641	813266	942683	1.0351e+06	990589
KAI8128278.1		67617.2							2.23544e+06	6.19504e+06	3.68069e+06	5.52604e+06
KAI8128276.1		281524				68115.3	48260.4		8.08472e+06	5.57675e+06	5.94155e+06	5.3824e+06
KAI8128275.1		255047	33840.4			151123	97164.9	121503	6.01902e+06	5.66356e+06	6.55765e+06	4.5593e+06
KAI8128266.1	6.65646e+06	6.56977e+06	5.86241e+06	3.7283e+06	40857.6	892151	275757	1.53426e+06	3.85928e+06	3.72878e+06	3.16627e+06	4.61239e+06
KAI8128265.1	140862	1.58915e+06	1.49888e+06	9.87656e+06	934880	772606	173308	1.8433e+06	1.16252e+07	2.19299e+07	9.12241e+06	1.81167e+07
KAI8128210.1	2.73253e+07	1.83436e+07	1.99804e+07	1.45651e+07	708761	4.67896e+06	5.13444e+06	5.71572e+06	1.75014e+07	1.52063e+07	1.3409e+07	1.97897e+07
KAI8128200.1	243411	259925	395165	173404					153893	235959	144462	195482
KAI8128199.1	90681.1	89788.6	85426.7	30408.8					54869.2	78145.2	85588.7	88937.3
KAI8128172.1	607606	510435	590441	407281	695567	370982	375467	440635	694273	457333	639666	636519
KAI8128163.1			247540	301303				44606.8	736748	94285.4	239154	51609.4
KAI8128157.1	1.47078e+07	4.50273e+06	5.68548e+06	2.78963e+06	147921	513416	126472	102498	6.95382e+06	2.07042e+06	2.01021e+06	2.86738e+06
KAI8128093.1									160402	217656	100613
KAI8128081.1	1.41559e+06	833175	642485	592377		156224	177496	212729	474550	490362	509529	574406
KAI8128077.1	2.71536e+06	3.04334e+06	1.94381e+06	1.7257e+06	65032.1	189524	182942	214512	1.08499e+06	1.83804e+06	1.44088e+06	1.97015e+06
KAI8128075.1	4.92425e+06	2.27647e+06	4.2068e+06	2.24705e+06	275247	446244	589613	999658	2.95658e+06	1.51257e+06	1.97983e+06	1.54746e+06
KAI8128071.1				362835					500449	606948	558234	686844
KAI8128058.1										73640
KAI8128055.1	44931.7		10916.8	327464					499658	399224	633756	623401
KAI8128051.1							676206
KAI8128046.1	201206	160512	178759	105690				64895.1	124958		130135
KAI8128043.1	117782	1.37194e+06	1.15125e+06	289903	1.37086e+06	359322	2.2886e+06	2.54993e+06	2.66217e+06	4.1006e+06	5.48382e+06	4.18648e+06
KAI8128040.1	4.86279e+06	1.75176e+06	1.23761e+06	1.09798e+06	264118	342961	97546.9	166485	1.13487e+06	457750	3.91989e+06	536332
KAI8128031.1	531570	380070	744624	156616					324598	21727.4	21760.7
KAI8128018.1	80678.8	20787.7	51586.4	51759.1				9364.13	66527.9	112434	93364.6	191332
KAI8128008.1									199880			393578
KAI8127984.1	13804.5	12092.8	25115.4	13868.6		4665.66	3112.46	5013.65	19527.7	12711.9	13466.2	21341.3
KAI8127930.1	1.12436e+06	855357	534044	293681		73867.4			229038	40269.6	51385.5	93610.2
KAI8127913.1	310955	134511	153571	733746					476776	1.10606e+06	835720	1.4548e+06
KAI8127911.1	86052.3					43817.9
KAI8127904.1	402355	427567	827080	401458					526559	764575	269527	285043
KAI8127903.1									3.97617e+06	7.72198e+06	5.30036e+06	8.09617e+06
KAI8127898.1	523193	560561	502500	830718		39550.4		214318	2.01795e+06	3.67602e+06	1.61195e+06	2.92469e+06
KAI8127873.1	63274.4	104278	87633.8	61054.8					1.04814e+06	2.70475e+06	1.09781e+06	1.71911e+06
KAI8127868.1		300301							131051	152377	137527
KAI8127866.1	1.26713e+07	8.67355e+06	1.63736e+07	2.26217e+07	4.87998e+06	5.16871e+06	5.86644e+06	5.32709e+06	1.93066e+07	2.26096e+07	2.50231e+07	2.71512e+07
KAI8127851.1	5.04378e+06	3.06442e+06	4.01758e+06	2.00659e+06	348053	922291	850991	1.54213e+06	3.58545e+06	2.06314e+06	2.43576e+06	1.55062e+06
KAI8127843.1				104790					233622	259201	240252	229109
KAI8127830.1	1.00382e+06	431499	1.27843e+06	341684	1.21118e+06	520553	718915	457206	324712	297559	295102	358196
KAI8127829.1	6.80314e+06	7.00076e+06	1.13161e+07	5.09509e+06	6.0053e+06	2.53116e+06	3.45826e+06	2.95567e+06	5.39039e+06	3.16154e+06	3.83047e+06	3.76311e+06
KAI8127823.1	1.90241e+06	987917	1.54357e+06	935055					120488
KAI8127820.1		368468	210247	1.01875e+06					514442	2.94083e+06	2.14056e+06	2.97983e+06
KAI8127795.1	92151		76171.9	73689.6					122968	182178	112260	134505
KAI8127783.1	412024	434193	586196	855283	1.49413e+06	1.49789e+06	2.07751e+06	1.96374e+06	88078.9	253117	336730	189709
KAI8127779.1	1.0575e+06	1.05311e+06	2.06644e+06	957702					421840			33097.3
KAI8127777.1	936755	708558	1.05285e+06	373830	245103	72902.2		241181	342032	220549	244525	247400
KAI8127728.1	1.87907e+06	2.77064e+06	3.26965e+06	5.00747e+06	2.17379e+06	673736	938709	612742	3.26282e+06	4.77493e+06	4.2808e+06	6.24628e+06
KAI8127704.1	728114	222376	328169	227364	446388	81381.6	79946.4	129771	852317	987626	922987	659689
KAI8127696.1	553192	659425	933482	1.23508e+06		70178.9			1.20885e+06	1.89654e+06	1.53137e+06	3.3061e+06
KAI8127675.1	451106	541878	534789
KAI8127664.1	1.35539e+06	1.29551e+06	727507	436974		109945			285146	333137	535595	220458
KAI8127663.1	2.68966e+06	1.18554e+06	656113	2.41634e+06		79613.1	109718	210768	3.87425e+06	5.76053e+06	5.0988e+06	6.83417e+06
KAI8127645.1	129040	380804		1.78489e+06	334280	1.20226e+06	1.03728e+06	765403	3.20651e+06	4.0408e+06	5.32302e+06	2.82257e+06
KAI8127639.1	1.76319e+06	1.18297e+06	855179	450502				87505.2	301419	261535	233952	426133
KAI8127634.1	2.98498e+06	2.84499e+06	4.62238e+06	2.20074e+06	636409	718534	404096	866908	5.37804e+06	2.81502e+06	1.49009e+06	3.26657e+06
KAI8127633.1	3.26958e+06	1.34091e+06	1.40199e+06	1.3152e+06	2.43651e+06	862510	1.61088e+06	1.07556e+06	3.6898e+06	4.40314e+06	6.16839e+06	4.79125e+06
KAI8127630.1	568858	486790	367811	209991					218905	242407	110607	73521.9
KAI8127622.1		46442.8
KAI8127621.1	1.2875e+06	720111	1.29183e+06	531957		92577.3		242032	449615	356882	597395	580353
KAI8127601.1	4.16746e+06	4.7691e+06	2.41524e+06	3.23505e+06	399871	652340	310409	461911	4.39894e+06	3.67507e+06	3.01312e+06	4.47881e+06
KAI8127585.1	1.58622e+06	1.06223e+06	1.15264e+06	1.08996e+06	686946	321149	451953	393555	1.47837e+06	798931	1.03584e+06	1.01084e+06
KAI8127570.1	1.35274e+06	1.02489e+06	1.29146e+06	885880	87183.6	297373	64555.5	601543	2.80147e+06	4.26848e+06	3.12502e+06	5.55945e+06
KAI8127515.1		825332	1.08427e+06	1.62612e+06	401944	684321	560763	1.99969e+06	3.1532e+06	5.26463e+06	2.3999e+06	5.00701e+06
KAI8127486.1	229381	155416	227062	111044					394583		120616
KAI8127485.1	4.25725e+06	3.15014e+06	4.56579e+06	2.28354e+06	1.41907e+06	3.38163e+06	2.0012e+06	1.48394e+06	2.95175e+06	833532	1.37723e+06	841013
KAI8127474.1	321447	518676	234467	804028	130924	56461.9	98529.2	334477	2.13505e+06	3.55754e+06	3.16795e+06	2.80455e+06
KAI8127437.1	218247			217463			71711.9		156399	194038	169837
KAI8127424.1		47342.1	73769.5	15957.6		34020.2			59161.9	67233.8		146772
KAI8127407.1	2.49054e+06	1.74351e+06	1.90618e+06	1.00793e+06	75094.6	92455.6		535220	1.92364e+06	1.85599e+06	1.5926e+06	2.30229e+06
KAI8127406.1	1.25168e+06	978439	1.00464e+06	705555				108955	797288	749083	486279	730336
KAI8127402.1	513516				89126.6		203469	242203	418873	578641	564759	195543
KAI8127385.1	3.32727e+07	2.6114e+07	1.81422e+07	1.0945e+07	4.07715e+06	5.63963e+06	6.02867e+06	5.86205e+06	1.01055e+07	1.05577e+07	1.00229e+07	1.17399e+07
KAI8127373.1	1.75989e+06	1.32356e+06	4.58683e+06	1.35569e+06					108938		130528
KAI8127371.1	7.79772e+06	8.08148e+06	3.76866e+06	2.62836e+06	534820	1.69268e+06	2.54537e+06	2.53869e+06	2.39079e+06	1.58404e+06	1.15368e+06	2.71442e+06
KAI8127358.1	1.85789e+06	1.63639e+06	3.88331e+06	2.21507e+06		149957		265834	1.75646e+06	1.98143e+06	1.44006e+06	1.74976e+06
KAI8127351.1	814786	621181	597066	1.15377e+06		86406.7	259355	479111	1.04289e+06	1.14283e+06	1.45405e+06	1.57742e+06
KAI8127321.1	404691	176035	318666	112204	81506.1	170664		195703	577040	261979	229507	219394
KAI8127310.1	2.14786e+06	3.01953e+06	4.07268e+06	2.78972e+06	185101		198464	146864	2.15753e+06	3.59667e+06	2.5896e+06	3.66643e+06
KAI8127302.1	406273	626296	538757	180226	52193	98079.7	111220		661949	418611	380267	380577
KAI8127291.1	519885	159037	193778	153615	96439.2	42125.7	101645	75026.7	167522	165578	225256	252319
KAI8127287.1	164638	484006	123072	333490					641396	524608	380471	630461
KAI8127286.1		157616	254207	162131					127038	165442	134498
KAI8127269.1	6.99816e+07	7.06275e+07	7.90154e+07	7.22075e+07	9.76102e+06	1.18118e+07	9.19251e+06	1.82694e+07	6.81771e+07	7.68633e+07	6.40819e+07	8.44081e+07
KAI8127260.1	8.10333e+06	8.36817e+06	7.60954e+06	3.97582e+06	169991	1.02293e+06	121119	1.50029e+06	3.64866e+06	2.54089e+06	2.54036e+06	2.11633e+06
KAI8127247.1	5.62298e+06	2.94987e+06	2.93999e+06	1.36677e+06	67701.6	70570.7		180416		30947.3
KAI8127235.1	157655	182772	120920	796951		83368.2		49598.6	1.37401e+06	2.20934e+06	1.84835e+06	2.52881e+06
KAI8127215.1	4.11095e+06	4.83027e+06	8.59143e+06	2.2895e+06	119298	464593		899550	2.58656e+06	2.32686e+06	2.25617e+06	1.74356e+06
KAI8127214.1	447712	182994	227386	175308					193403	187653	133223	191152
KAI8127209.1	1.20179e+08	1.13548e+08	1.30658e+08	1.26946e+08	2.36323e+07	3.68659e+07	2.53329e+07	3.14535e+07	6.832e+07	6.83735e+07	8.39906e+07	8.91878e+07
KAI8127198.1	1.02442e+06	492092	1.84059e+06	949739	133765				1.32344e+06	1.3076e+06	1.22553e+06	1.82723e+06
KAI8127172.1	1.13133e+06	1.17735e+06	322305	491488	117954	312343	88277.5	528711	1.43317e+06	1.38007e+06	1.11049e+06	1.70873e+06
KAI8127163.1	1.3824e+07	1.13056e+07	1.15466e+07	5.2074e+06	523710	964701	334554	950272	8.64895e+06	4.54988e+06	3.97717e+06	4.91325e+06
KAI8127148.1		305229	362168	1.03427e+06				199042	857113	1.96325e+06	1.06329e+06	2.44217e+06
KAI8127147.1	28067.2	16831.3	40666.3	19565.9					29182.3	28435.7	19563.7	18195.7
KAI8127130.1	1.3471e+07	7.72299e+06	1.11774e+07	5.71013e+06	268790	1.00589e+06	940258	988538	5.33093e+06	2.3389e+06	2.26597e+06	2.0034e+06
KAI8127097.1		687136		757895	874210	1.17553e+06			719971	1.4465e+06	323177	294759
KAI8127091.1	1.91816e+06	1.91473e+06	1.10298e+06	493115					333146	329401	289265	269007
KAI8127083.1	957667	399357	1.01699e+06	562663				30733.8	504854	612392	90973.5	476184
KAI8127082.1	1.45968e+07	7.86738e+06	7.22835e+06	2.25314e+06	199819	141482		78721.7	5.36717e+06	672792	1.17655e+06	1.7442e+06
KAI8127029.1	262971	608937	1.06306e+06	557878	82467.8	92184.4	90036.5	252033	694112	752144	529769	658724
KAI8127027.1	540728	389080	571203	275474				29349.7	215286	245591	168143	158383
KAI8127013.1	4.87305e+06	4.0974e+06	2.31616e+06	1.89437e+06	346835	846183	816944	783599	2.46512e+06	2.05892e+06	2.72904e+06	2.37929e+06
KAI8127001.1	5.11742e+06	3.44372e+06	3.14062e+06	6.93013e+06	48257.3	243462	320809	719990	8.99662e+06	1.48135e+07	1.09305e+07	1.57066e+07
KAI8126992.1	238035	157563		83953.2						64792.1
KAI8126989.1		85755.9		212758					193073	449006	415389	101240
KAI8126981.1	1.10874e+06	1.22225e+06	1.27277e+06	754520		130646		134490	547857	230967	149559	180088
KAI8126957.1	45399.8										41999.4
KAI8126923.1		1.2723e+06	1.58228e+06	1.68943e+06	69380.7	302087	87266.8	582313	1.58671e+06	2.59303e+06	1.70996e+06	2.98258e+06
KAI8126913.1	1.27219e+06	1.27856e+06	1.07112e+06	1.48041e+06		171308		202719	2.05429e+06	2.00667e+06	2.61664e+06	1.99793e+06
KAI8126902.1	744700	312721	1.11672e+06	591847					293068	385194
KAI8126887.1	753907	1.36979e+06	1.35993e+06	2.43427e+06	40224.6	216582	192191	763453	3.51676e+06	4.77479e+06	4.77448e+06	7.21503e+06
KAI8126884.1										241612	113905	203396
KAI8126880.1	71150.6	641603	202518	542558	1.34636e+07	1.64347e+07	8.86748e+06	1.15795e+07	2.35598e+07	2.21333e+07	2.91204e+07	1.89732e+07
KAI8126873.1		294449	39877.8	334117	5.93022e+06	7.58318e+06	3.20618e+06	3.51031e+06	1.78532e+07	1.12942e+07	1.78958e+07	5.68234e+06
KAI8126872.1		260491		222054	3.86289e+06	3.33588e+06	1.61149e+06	1.48141e+06	9.39731e+06	6.20729e+06	9.41866e+06	4.06761e+06
KAI8126839.1	1.45149e+06	1.00685e+06	1.80979e+06	2.1485e+06	205064	769526	552640	1.36487e+06	3.74509e+06	4.96372e+06	3.19615e+06	3.75698e+06
KAI8126810.1					169341				234046	259413	472595
KAI8126803.1	118261	164060	77266.2	191592					326385	334043	580812	514629
KAI8126798.1	2.33524e+06	2.47015e+06	2.96184e+06	2.08909e+06				169346	2.5329e+06	1.82373e+06	996308	1.76812e+06
KAI8126739.1	293052	229224	262294	147921	223575	72886.6		73119.5	361277	596278	451312	361677
KAI8126709.1	2.61992e+06	2.15297e+06	2.25272e+06	2.04503e+06	187124	178758	115476	212027	3.47933e+06	5.9985e+06	2.97762e+06	4.05439e+06
KAI8126682.1	481843	261026	340192	296912					194024	100913	219161	147222
KAI8126655.1	118149	72972.5	109433						152544	191465	89671.9	190785
KAI8126653.1		114475	168331	146615	100203				384957			238047
KAI8126616.1	1.10456e+06	936616	1.25738e+06	1.65553e+06					3.40455e+06	3.85481e+06	3.22325e+06	4.53312e+06
KAI8126615.1	1.54601e+06	1.05177e+06	1.03926e+06	1.1912e+06	63664.7	60272.2	26683.9	82443.6	1.24573e+06	1.70439e+06	1.14617e+06	2.04593e+06
KAI8126611.1	211566	513867	963865	732710	1.09773e+06	676706	1.34891e+06	854869	1.10942e+06	430212	857774	675849
KAI8126608.1	1.28321e+06	961786	1.71581e+06	696992	653646	174650	198578	238168	2.03962e+06	2.69637e+06	1.92945e+06	3.33126e+06
KAI8126607.1	4.47378e+07	2.41211e+07	3.08831e+07	1.69575e+07	3.16939e+06	4.41083e+06	3.16086e+06	7.6776e+06	2.31508e+07	1.30121e+07	1.38189e+07	1.27422e+07
KAI8126589.1	62384.3	7445.36	44428.2	33756.8	8340.59	26301.6		29983.9	320325	404574	462442	311065
KAI8126583.1	623176	869898	575036	305103				43187.8	133652	313465	85137.7	363651
KAI8126550.1	6.34487e+07	3.8481e+07	5.30149e+07	2.7841e+07	1.09779e+06	4.98875e+06	3.33171e+06	6.962e+06	3.14621e+07	1.72841e+07	1.75062e+07	2.14795e+07
KAI8126526.1	1.15018e+06	569453	767185	606807						208561	247188	262650
KAI8126515.1	296099		434975	78884.8
KAI8126484.1	1.94767e+06	1.276e+06	1.31063e+06	994608		103310			1.9082e+06	1.56575e+06	1.47629e+06	2.01161e+06
KAI8126482.1				65389.8
KAI8126472.1	125828	252691	104764	277863		60426	125006	115930	764474	1.12109e+06	353898	748815
KAI8126471.1		194613		282458	2.1717e+07	8.94488e+06	1.81042e+07	8.21869e+06	3.65325e+06	4.87021e+06	6.7709e+06	3.14962e+06
KAI8126468.1											28074.4
KAI8126464.1	2.78671e+06	2.61865e+06	378297	3.01089e+06	58779	227014		164583	3.26528e+06	3.14847e+06	5.17245e+06	2.86337e+06
KAI8126459.1				30119	6.59573e+06	2.83801e+06	5.533e+06	2.1377e+06	612997	1.52294e+06	2.1622e+06	693907
KAI8126450.1	4.63425e+07	2.70845e+07	5.00386e+07	2.38022e+07	2.21183e+06	5.3072e+06	1.65051e+06	4.67931e+06	1.29249e+07	1.02451e+07	1.11494e+07	7.68211e+06
KAI8126445.1		99689.8	137313	153815		18440.7	16303.1	16756.9	312873	414721	91294.5	183251
KAI8126439.1	382679	530944	678532	685988	81073.3	100666	87611	175320	524076	661006	349438	637230
KAI8126410.1	1.46189e+06	917249	2.19733e+06	1.28241e+06					466401	895406	639609	851299
KAI8126396.1	928011	1.25999e+06	942957	520988					663215	463732	298975	616445
KAI8126389.1	3.83936e+07	2.91078e+07	3.81668e+07	2.35774e+07	4.85135e+06	5.99612e+06	3.96602e+06	5.40588e+06	2.53212e+07	1.13284e+07	1.15691e+07	1.07439e+07
KAI8126367.1	796253	539782	1.33121e+06	546752					451037	536547	525926	480142
KAI8126348.1						1.22143e+06	1.4873e+06	1.9566e+06	196512		434148
KAI8126347.1	487527	537095	334226	449625	129736			139445	1.22658e+06	496500	734987	377218
KAI8126343.1	2.19505e+06	2.64247e+06	4.83296e+06	5.27217e+06	31386.2	154662		433769	2.3725e+06	3.3984e+06	2.99178e+06	4.01214e+06
KAI8126340.1	1.15487e+07	1.35719e+07	1.31149e+07	8.9205e+06	627116	1.60999e+06	898308	1.75398e+06	6.0543e+06	5.35284e+06	6.5507e+06	5.552e+06
KAI8126332.1	68115	48230.6	42907	51589.7					53464.2	111254	243987	115979
KAI8126314.1	1.45203e+06	793519	1.27955e+06	621159				126944	977830	869798	531851	1.0645e+06
KAI8126235.1	1.95925e+07	1.62319e+07	2.59042e+07	2.23423e+07	4.74368e+06	4.31458e+06	6.18083e+06	6.06113e+06	1.37976e+07	1.49301e+07	2.33178e+07	1.787e+07
KAI8126232.1						38399.9	29265		100486	86642	133021	126370
KAI8126210.1				75810.2					200924	268656	159844	312759
KAI8126194.1	168614	131878	133746	49899.4					65510.5			50485.8
KAI8126152.1	2.90718e+06	1.51466e+06	4.03246e+06	2.72534e+06	27913.4	236140	113626	312149	2.36464e+06	5.57796e+06	3.78532e+06	5.88814e+06
KAI8126121.1	346683	537608	1.10326e+06	917572	58462	188583		173313	408471	390440	165796	156363
KAI8126105.1	2.4563e+06	1.88507e+06	4.80114e+06	1.60661e+06		72075.5	69721.1	121365	997968	2.14855e+06	947849	1.43669e+06
KAI8126051.1									1.78978e+06	1.52992e+06	1.90294e+06	1.60482e+06
KAI8126050.1	654280	5.21408e+06	1.52547e+06	670602	1.7809e+06	3.2342e+06	3.61184e+06	4.52351e+06	7.84034e+07	7.45223e+07	3.623e+07	4.35168e+07
KAI8126048.1					39213.5	47534.5		50177.2	623033	576935	685051	649647
KAI8126036.1	323586	231677	166727	130526					88484.9	116878	77015.6	95539.4
KAI8126021.1				13280.6
KAI8126007.1	2.15702e+06	506493	482403	169741	10940.4			54582.8	265276	130698	248820	210274
KAI8125996.1	555330	379754	1.09189e+06	540774		56166.3		88329.9	556646	184712	480304	239018
KAI8125982.1	551093	258772	576197	56149.8
KAI8125967.1	161672	21349.6							15105.5			17164.7
KAI8125947.1				64021.5						164577		106298
KAI8125945.1	787426	738653	425635	170622					119351	75983.6	44219.9	39175.7
KAI8125931.1	1.18232e+08	9.99891e+07	1.24681e+08	7.99847e+07	2.31594e+07	4.05706e+07	2.8819e+07	3.64818e+07	1.15188e+08	5.18687e+07	4.731e+07	5.53847e+07
KAI8125912.1	255122	111308	103632	117748	453937	222651	348638	330818	436338	159381	152791	97927.1
KAI8125866.1	178773	358177	288941	633372		196409	109135	312055	369640	743436	361255
KAI8125864.1	154370	95456.5	159134						119081	100526	208833	205040
KAI8125841.1	1.04885e+06	768815	1.39504e+06	1.50708e+06		68030.2		163151	1.80252e+06	4.90948e+06	1.62809e+06	3.83963e+06
KAI8125835.1	1.34751e+07	1.85774e+07	9.42634e+06	1.00226e+07	1.52919e+07	1.83881e+07	7.66585e+06	2.59398e+07	1.86878e+07	1.32549e+07	1.55134e+07	1.45207e+07
KAI8125833.1				20642.6					19520.8		39918.9	61971.5
KAI8125818.1	1.04536e+06	805451	507787	327206	38806.8	93312.7	100573		429649	501982	348426	368753
KAI8125800.1				312169				50404.5	637496	604820	758823	495007
KAI8125798.1	420372	213566	303447	202011		41186.7			182505	149042	69387.9	136175
KAI8125790.1		772147				82725.7				125388		225620
KAI8125777.1	468074	417911	195037						362860	361745	192184	187323
KAI8125756.1										82710.2		83241.6
KAI8125749.1	7.02472e+06	7.57125e+06	6.50448e+06	3.27783e+06	476907	382430	370560	124074	1.9159e+06	1.42347e+06	2.13546e+06	1.04443e+06
KAI8125747.1	2.80607e+06	2.33816e+06	4.49568e+06	2.6585e+06				274593	1.62369e+06	2.53189e+06	3.22713e+06	4.86752e+06
KAI8125738.1	408631	307258	640100	267359							27527.9
KAI8125732.1		246636	258241	955607	42125.4				1.0183e+06	1.63487e+06	1.19998e+06	1.76886e+06
KAI8125726.1	609656	802215	1.25239e+06	340318					752094	1.26244e+06	524946	1.257e+06
KAI8125714.1	381728	346662	362069	232677	49399.4				374575	357629	150431	290984
KAI8125710.1	4.95701e+06	3.34551e+06	3.20666e+06	1.94828e+06	460440	1.06289e+06	336187	1.15347e+06	8.37632e+06	3.00107e+06	4.47361e+06	4.49537e+06
KAI8125705.1		305827		269768					555710		920323	514675
KAI8125698.1	244670	144139	147769	810349				78198.2	754637	1.5561e+06	1.19934e+06	1.71205e+06
KAI8125693.1	470077	284728	833342	699813					598882	786277	733880	1.18855e+06
KAI8125692.1	1.53244e+06	531807	658556	104991	114451	135459	81375.2	75988.8	1.2436e+06	907171	571109	1.07393e+06
KAI8125689.1	4.73032e+07	5.13512e+07	2.89265e+07	1.64204e+07	2.32704e+07	2.97183e+07	8.79014e+06	4.23489e+07	3.70129e+07	2.59146e+07	3.25997e+07	3.07086e+07
KAI8125684.1	3.5517e+06	2.06e+06	2.05587e+06	5.82221e+06	238931	635886	501740	1.49555e+06	5.14899e+06	9.16209e+06	7.72928e+06	8.65714e+06
KAI8125663.1	2.61991e+07	1.71022e+07	2.11265e+07	1.35743e+07	1.67424e+06	4.43375e+06	2.74305e+06	3.78201e+06	1.32916e+07	5.3541e+06	7.7954e+06	6.30286e+06
KAI8125645.1	2.19801e+06	1.96793e+06	2.1482e+06	2.20895e+06		888732	1.02005e+06	888395	2.51712e+06	1.78285e+06	2.17023e+06	426833
KAI8125644.1			278308						1.11035e+06	523986	649858	805212
KAI8125633.1	174801	172631	195383	110978	24705.2	50262.8	39467.4	70484.2	471849	553425	344033	605172
KAI8125610.1	891116	1.29941e+06	476425	997487	668180	963747	719663	556967	3.7074e+06	3.19786e+06	5.64453e+06	2.37567e+06
KAI8125607.1	1.82241e+06	1.2314e+06	1.53633e+06	662388			268168	383917	582319		426718
KAI8125597.1	225480	81171.1	158475	84865.1					65646.7		32589.3
KAI8125571.1									574397		746868	46536.6
KAI8125570.1	2.77861e+06	1.1815e+06	1.31123e+06	937563			16692.7	61404.7	1.07949e+06	1.02025e+06	957407	1.35814e+06
KAI8125568.1				51833.8					253119	218551	186126	43175.2
KAI8125565.1	44747.2		215496	228209					329609	423041	313990	540359
KAI8125559.1	4.07679e+06	2.65423e+06	1.05305e+07	7.99655e+06		89913.5		360500	5.71352e+06	7.44515e+06	9.06304e+06	9.50882e+06
KAI8125519.1	76398.2	99391.3	104723	369399		39962.5		56798.5	1.25027e+06	1.84209e+06	1.52574e+06	2.18007e+06
KAI8125514.1	1.69579e+06	436551	673982	354698		94068.4	40227.8	54481.8	592189	342402	474137	373405
KAI8125509.1	2.01986e+06	1.29912e+06	1.70846e+06	485046					613930	571920	760273	950156
KAI8125507.1	78487.6	86260		228330		33113			209513	251365	330319	458093
KAI8125503.1								33536.6	373658	345835	528612	573218
KAI8125489.1	614722	297368	938877	242759					143323	240797	260299	362255
KAI8125472.1	153748	195911	104875	15414.5					93630	71889.6	61322.1	70462.7
KAI8125448.1	2.22704e+06	4.1258e+06	4.21386e+06	2.70736e+06				452631	1.61723e+06	2.00374e+06	1.39572e+06	1.9729e+06
KAI8125445.1	2.48775e+06	649733	859253	570265	283158	158814	31777.6	247384	1.86525e+06	1.22212e+06	1.1367e+06	1.26052e+06
KAI8125437.1	2.52586e+07	1.28294e+07	2.40581e+07	1.22069e+07	1.54381e+06	1.11777e+06	876778	2.21343e+06	7.52141e+06	3.02014e+06	5.85317e+06	3.788e+06
KAI8125435.1	3.09258e+06	3.73536e+06	2.16062e+06	1.72557e+06	351063	487981	648395	563156	4.35058e+06	6.4244e+06	4.33697e+06	6.70546e+06
KAI8125421.1	1.32612e+06	985261	707505	909873				146465	861637	1.81323e+06	1.52964e+06	1.91281e+06
KAI8125403.1	171650		161130	218069					146143	65453.7		90179.7
KAI8125389.1	227537	354008	526217	372729	48716.2	60756.9	61154.1	121004	428585	433413	426349	196144
KAI8125371.1	5.62082e+06	5.28721e+06	4.53614e+06	2.1825e+06	69097.2	431444	151983	549435	1.11393e+06	1.236e+06	2.13933e+06	1.52058e+06
KAI8125349.1	616824	726597	623483	1.14139e+06				17400.5	812653	2.40856e+06	1.46631e+06	2.21941e+06
KAI8125341.1	598129	556666	333892	59140.9	42333.9	63589.4		40133.6	380838	418941	189894	224198
KAI8125337.1	124419	137683	117314	151519					199210	166595	165435	229560
KAI8125334.1	2.23447e+06	6.07964e+06	7.30122e+06	7.88465e+06	641995	1.43884e+06	451526	2.38759e+06	6.89946e+06	1.05766e+07	8.64626e+06	1.00553e+07
KAI8125321.1	1.14217e+06	1.02772e+06	664500	1.04499e+06					1.61466e+06	2.66099e+06	1.93477e+06	3.69509e+06
KAI8125318.1										43725.4	29059.5	68288.2
KAI8125295.1	927514	519078	919153	631386					320186	286674	249928	188638
KAI8125271.1	347967	647994	1.54533e+06	1.85619e+06	1.10706e+06				1.10259e+06	2.05146e+06	973396	2.31399e+06
KAI8125262.1	8.77871e+06	8.65221e+06	6.0927e+06	3.58033e+06	242646	712459	539249	1.35436e+06	4.23561e+06	3.03553e+06	3.33768e+06	3.22925e+06
KAI8125250.1	2.48888e+06	1.97227e+06	3.62525e+06	2.2735e+06	83107.5	114160		304755	2.20382e+06	1.40795e+06	1.79603e+06	1.46764e+06
KAI8125232.1	4.25594e+06	3.30312e+06	2.75023e+06	1.27073e+06		170927		129037	1.126e+06	232947	554658	404731
KAI8125220.1	413347	488025							280283	305777
KAI8125208.1	9.7807e+06	1.26709e+07	8.29616e+06	5.33957e+06	364444	1.51309e+06	1.1724e+06	1.65644e+06	6.96998e+06	7.35558e+06	4.1612e+06	6.58057e+06
KAI8125198.1	2.79243e+06	1.36524e+06	2.39223e+06	1.44043e+06				315391	582076	827909	395741	575018
KAI8125181.1	705421	1.84642e+06	959619	975880					1.62113e+06	2.9004e+06	1.35406e+06	2.9586e+06
KAI8125172.1	602082	346505	1.13913e+06	97916.8	65508.2	142205		103780	685718	1.31073e+06	891974	1.01366e+06
KAI8125164.1	4.66594e+06	2.53874e+06	938236	1.02987e+06	220017	255130	156612	317632	2.74135e+06	694248	2.76776e+06	1.10783e+06
KAI8125136.1			106377	123480
KAI8125094.1	128252	611606	217977	1.33983e+06		251764		553989	1.32783e+06	2.47065e+06	1.75343e+06	2.84437e+06
KAI8125092.1	767253	567272	1.09772e+06	976733					1.73733e+06	2.39111e+06	992963	1.67812e+06
KAI8125064.1	3.08082e+06	1.91768e+06	2.34739e+06	716991		414782		194418	1.81208e+06	475179	1.22826e+06	853872
KAI8125038.1	1.12148e+07	7.58193e+06	5.48518e+06	3.0675e+06	71019.7	444719	275124	329339	5.17289e+06	3.3686e+06	2.17933e+06	3.26585e+06
KAI8125035.1	824693	1.28157e+06	1.35285e+06	2.85901e+06	407520	1.30415e+06	675044	3.46094e+06	5.20545e+06	9.01723e+06	3.77557e+06	9.17342e+06
KAI8125034.1	5.73372e+06	3.60392e+06	2.16357e+06	1.56677e+06	381544	48228.7	83975.6	1.60785e+06	8.92358e+06	7.82552e+06	6.53683e+06	1.14874e+07
KAI8124991.1	1.92372e+06	834613	1.17009e+06	1.47681e+06					1.49865e+06	2.25606e+06	2.00844e+06	3.46738e+06
KAI8124989.1		126518	146442	349137						553588	488691	647606
KAI8124981.1	387397	176046	438392	128828	375525	480237	515928	226324	278106	179726	89904	157764
KAI8124968.1		51976			93108.3							76417
KAI8124936.1	603632	388236	227946	362329		93126.4	160018	113808	844933	1.32616e+06	652485	1.04367e+06
KAI8124917.1	451416	777399	928235	1.71814e+06	211459			255588	393134	463326	909331	648372
KAI8124913.1									54119.4	85910.2	84252.3	95784.5
KAI8124863.1		54965.1	76866.1	352053					187565	479249	273050	634845
KAI8124857.1			37364.1	113322					166740	342208	184574	281755
KAI8124835.1	1.37798e+07	1.01998e+07	1.2832e+07	8.18493e+06	60239.3	342917	162592	666204	1.82575e+06	955767	1.41656e+06	1.71681e+06
KAI8124826.1		267068	342309	63588.4
KAI8124816.1	1.11331e+06	821638	1.26144e+06	997270				305272	1.51616e+06	2.25952e+06	2.27888e+06	3.55411e+06
KAI8124786.1	1.43173e+06	1.09746e+06	2.18045e+06	2.33726e+06		50183		69503.8	1.69213e+06	1.28046e+06	1.39847e+06	2.17232e+06
KAI8124775.1	4.77937e+06	5.94135e+06	4.16077e+06	2.88277e+06	501730	2.2984e+06	880617	2.40018e+06	6.10174e+06	7.62862e+06	5.05348e+06	8.6274e+06
KAI8124764.1	3.11572e+06	1.63586e+06	4.57917e+06	2.88923e+06		23390.2			227080	302312	466020	597078
KAI8124718.1			132633			32780.6				236217	113636	265035
KAI8124702.1	142008	402249	317097	912185		18101.6		18529.8	419825	464968	483922	381034
KAI8124701.1	469960	1.15465e+06	1.33345e+06	2.65687e+06	92378.9	209103		794771	4.12546e+06	7.2516e+06	4.48914e+06	8.37897e+06
KAI8124699.1	870434	726324	980401	659157	95863.5	90178.9		156449	780010	907853	749538	959524
KAI8124695.1				109985
KAI8124673.1										143212	113065	113573
KAI8124670.1	356643	319019	458411	377832
KAI8124616.1	5.32789e+06	3.15168e+06	5.59023e+06	972922	95616.7	361432	265985	368548	537868	589551	307319	541758
KAI8124610.1	102705	517217	467779	593199					2.24032e+06	4.23759e+06	2.45144e+06	5.68401e+06
KAI8124599.1	184629	375944	133725	152783					308817	344365	187207	296843
KAI8124576.1		244251	170413	1.30501e+06	7.57038e+06	7.67134e+06	2.16622e+07	1.1534e+07	773492	814637	1.55773e+06	739379
KAI8124540.1	575243	201905	198564					69336.5	225430	54759.9	177716	261595
KAI8124528.1	3.18796e+06	3.26289e+06	2.62456e+06	9.03795e+06		855172	922373	2.77457e+06	2.28054e+07	3.32355e+07	2.79523e+07	4.93019e+07
KAI8124513.1	932566	970192	986258	475310					614362	229731	336080	401462
KAI8124505.1	5.39207e+06	6.12684e+06	6.65344e+06	3.66156e+06	1.49693e+06	2.28136e+06	2.10318e+06	2.6303e+06	6.5243e+06	4.95532e+06	4.3395e+06	4.68659e+06
KAI8124504.1	782229	1.31748e+06	1.06178e+06	1.13209e+06	23515.2	437440	441294	366900	1.12399e+06	978191	638229	595782
KAI8124451.1	550409	370290	683622	218200					193341
KAI8124438.1	1.83007e+06	1.05304e+06	1.38485e+06	336314	37967.2	171188	123485	249868	807208	967290	840093	1.33769e+06
KAI8124436.1	321583	1.01206e+06	928537	1.35379e+06		197192		448410	2.63891e+06	5.43268e+06	2.99559e+06	5.16049e+06
KAI8124429.1	355963	267062	308931
KAI8124407.1	145379	157935	186652	114778	30545.1				121807	150794	136136	119336
KAI8124399.1	204247	75256.7	297862	274966					184216	62780.3	51384.1	72959.2
KAI8124382.1	1.52524e+06	1.59926e+06	2.07059e+06	1.18759e+06	149316	109751	126063	345260	1.06987e+06	592032	480771	631064
KAI8124349.1	553024	472212	434801	246213					196318	219870	37535.7	225591
KAI8124345.1	4.15106e+07	2.86571e+07	2.74184e+07	1.49684e+07	3.76196e+06	5.72177e+06	2.60065e+06	4.52471e+06	2.14889e+07	1.06026e+07	1.05602e+07	1.05046e+07
KAI8124341.1	184378	127519	194442	96190.2				56763.6	188770	143456	74419.1	127894
KAI8124307.1			510357	233881					376614	369008		495791
KAI8124300.1						56131		111709	207845	166117	451923	220008
KAI8124264.1	733848	882336	757372	1.28559e+06		182217		392813	2.67734e+06	4.62186e+06	2.94389e+06	5.05516e+06
KAI8124261.1	2.76883e+07	2.31969e+07	1.65984e+07	8.05741e+06	848001	2.2343e+06	1.9935e+06	1.94096e+06	9.12241e+06	7.38256e+06	9.5699e+06	7.13356e+06
KAI8124248.1					263947	165153	446311	115005	642166	381323	1.34043e+06	284411
KAI8124226.1	249019	697428	660833	417785	1.90641e+06	1.16915e+06	1.30633e+06	488594	1.49189e+06	1.28187e+06	560324	901346
KAI8124205.1	114917	114941	130231						87431.4	141732		190065
KAI8124174.1	2.55672e+06	2.77588e+06	2.13189e+06	918000	1.97691e+07	1.03301e+07	1.00664e+07	9.79821e+06	8.44825e+06	8.12055e+06	3.54664e+06	4.24419e+06
KAI8124151.1		250302	618488	444392		215733		391302	606005	597220	514774	880916
KAI8124131.1		187653	184855	150305
KAI8124084.1	3.9456e+06	5.06417e+06	3.67127e+06	3.07416e+06	501489	577884	291305	923755	4.21361e+06	4.78973e+06	3.16703e+06	6.51527e+06
KAI8124080.1	432584	682525	569047	298662
KAI8124073.1	4.94633e+06	3.2667e+06	4.16214e+06	2.17384e+06	247276	1.14367e+06	997365	1.09794e+06	6.83649e+06	3.26276e+06	2.63076e+06	3.67867e+06
KAI8124062.1	2.54821e+06	2.04965e+06	2.89496e+06	1.7446e+06	119450	75482.5		104878	1.91598e+06	1.18524e+06	202555	583390
KAI8124057.1	2.11078e+07	1.54694e+07	1.16166e+07	7.55338e+06	958122	1.4559e+06	1.0096e+06	1.83186e+06	5.62183e+06	4.10626e+06	4.76437e+06	5.34675e+06
KAI8124054.1	1.39047e+06	860040	1.24532e+06	1.01094e+06		39445.5	64415.1	163110	1.41973e+06	2.39374e+06	1.42347e+06	2.19891e+06
KAI8124043.1	1.06991e+06	515005	440503	404469					502034	720402	511299	531541
KAI8124013.1	175153		150172	2.91029e+06		105880		419359	943996	2.08286e+06	1.38251e+06	3.03788e+06
KAI8124003.1		19688.1	18655.8	16533.3		37328.2	38553.5	58440.1	32878.3		11357.3	26303
KAI8123993.1				117959					82772.1	204731	48484.3	95383.7
KAI8123971.1	2.21733e+07	1.82426e+07	1.04067e+07	8.21428e+06	1.74428e+06	2.37782e+06	2.93103e+06	2.29502e+06	7.17719e+06	6.63546e+06	8.05817e+06	7.53825e+06
KAI8123966.1	709544	668173	21498.4	119109	235234	322182	179952	441067	2.87357e+06	3.24708e+06	3.58141e+06	1.8324e+06
KAI8123953.1	1.95544e+06	2.47292e+06	2.29132e+06	2.6839e+06	93765.8	91622.2	84592.9	169267	2.44314e+06	2.48221e+06	1.79359e+06	2.84039e+06
KAI8123940.1	222222	354568	650531	441832	415335	373331	580763	531218	380901	127622	898763	179597
KAI8123935.1				70890.1	117601	173528			403527	324972	312518	241105
KAI8123896.1	819850	622781	558023	272441	89954.1	121482			423823	342732	314339	269513
KAI8123894.1	211950	276457	280198	218685	113226	47450.9	55909	47263.3	236356	221563	187514	117713
KAI8123887.1	5.32639e+07	3.53804e+07	4.344e+07	2.80526e+07	3.12001e+06	6.42868e+06	4.62884e+06	5.91931e+06	2.82427e+07	1.48603e+07	1.64119e+07	1.58033e+07
KAI8123863.1		176876		263298	172549				495351	848395	1.04504e+06	325546
KAI8123862.1				209971					229304	349970	360018	394238
KAI8123844.1	791063	730438	1.19842e+06	301045
KAI8123841.1	1.81501e+06	1.44921e+06	2.70793e+06	464059	4.03471e+06	822783	2.09699e+06	1.58792e+06	4.47012e+06	3.02962e+06	4.11436e+06	3.65252e+06
KAI8123840.1	387540	421778	139193	103470		180561	104397	88752.5	376182	412043	304830	261464
KAI8123828.1	1.17899e+07	1.1747e+07	9.65187e+06	5.58606e+06	1.52413e+06	5.23767e+06	1.72425e+06	1.99342e+06	8.22492e+06	7.85649e+06	6.1926e+06	6.88727e+06
KAI8123806.1	2.05394e+07	1.41412e+07	2.1337e+07	1.09014e+07	717924	220537	57268.2	515979	6.3923e+06	3.23758e+06	2.73875e+06	3.72185e+06
KAI8123789.1	1.68331e+06	1.33006e+06	1.94606e+06	2.9938e+06		131584	64600.1	78460.8	2.45608e+06	2.72086e+06	2.58245e+06	1.80978e+06
KAI8123788.1	5.01799e+06	5.55821e+06	5.23514e+06	3.45688e+06	138140	303375		646294	2.29361e+06	3.07265e+06	2.90972e+06	4.03417e+06
KAI8123774.1	1.31114e+06	918371	3.10938e+06	735518	1.07346e+06	602876	877951	1.43808e+06	1.71138e+06	839006	2.00065e+06	830866
KAI8123741.1	4.99966e+06	3.77374e+06	8.51603e+06	3.14736e+06	2.65453e+06	2.6489e+06	2.214e+06	2.07972e+06	8.84996e+06	2.88654e+06	3.23996e+06	2.36614e+06
KAI8123737.1	841273	743847	1.5677e+06	484186	3.17466e+06	1.22841e+06	2.58798e+06	1.94053e+06	5.48531e+06	4.30189e+06	4.28357e+06	3.99239e+06
KAI8123712.1		190294	111397	1.06885e+06	19932.9				662778	1.72987e+06	801498	1.30382e+06
KAI8123696.1											319572
KAI8123691.1	1.54531e+06	2.18629e+06	2.6123e+06	4.09811e+06	551766	633823	446995	478085	3.94794e+06	5.18223e+06	5.02887e+06	5.41614e+06
KAI8123672.1	73419.7									101734		220323
KAI8123670.1	1.03193e+06	1.46673e+06	2.03387e+06	3.25056e+06	95219.5			145748	3.876e+06	4.8363e+06	4.43927e+06	6.17236e+06
KAI8123656.1	7.855e+06	4.77701e+06	6.11312e+06	1.88024e+06	2.2007e+06	1.12485e+06	1.60292e+06	1.22554e+06	6.97275e+06	6.26615e+06	5.05859e+06	4.51307e+06
KAI8123652.1	3.01283e+06	3.12102e+06	2.08556e+06	5.38321e+06	49379.2			280502	2.23367e+06	5.44829e+06	3.61808e+06	1.40461e+06
KAI8123643.1									12746.6	17507.2		47494.5
KAI8123640.1		210436	213629	259486	6.35807e+06	3.2805e+06	6.52205e+06	4.68345e+06	805289	1.13285e+06	1.94596e+06	1.31529e+06
KAI8123639.1	3.49233e+07	2.43087e+07	2.51721e+07	1.33732e+07	1.05452e+06	1.36626e+06	976593	1.74743e+06	9.53599e+06	8.45179e+06	5.91049e+06	8.03988e+06
KAI8123636.1			15990.9
KAI8123613.1	4.67096e+06	5.33382e+06	2.60155e+06	1.12592e+06	435616	1.25226e+06	419087	1.07846e+06	3.02394e+06	3.4592e+06	1.67299e+06	2.45056e+06
KAI8123591.1	535770	143867	160226	327642					853264	818895	941547	208078
KAI8123585.1	1.19622e+06	1.68351e+06	1.02949e+06	331042		82187.1			129464	382739	199532	192969
KAI8123568.1	231117	414294	1.03173e+06	1.38166e+06		35573.9		48482.3	542369	1.98675e+06	1.37107e+06	1.37953e+06
KAI8123562.1	145986	98640.1	171252	73336.5		11338.4			64788.7	67001.9	23969.5	57895.3
KAI8123553.1	588464	4.29041e+06	1.81545e+06	5.51312e+06	9.05555e+07	1.50707e+08	1.35137e+08	1.11372e+08	6.55301e+07	6.80404e+07	8.13996e+07	3.23347e+07
KAI8123524.1	1.31008e+07	1.18761e+07	1.43384e+07	1.58372e+07	1.00397e+06	1.54406e+06	579831	2.14494e+06	1.16867e+07	1.70715e+07	1.43474e+07	1.99822e+07
KAI8123518.1						4.57003e+06	3.83589e+06	3.26287e+06	1.39492e+06	2.17534e+06	4.16315e+06	1.17323e+06
KAI8123486.1	1.88309e+06	1.1514e+06	1.20483e+06	1.32344e+06			27861.4		1.20792e+06	1.68062e+06	1.57085e+06	2.3772e+06
KAI8123482.1	529219	385495	263776	428361		69640		240509	598102	1.16276e+06	864866	1.343e+06
KAI8123463.1	283118	449089	669479	266588	51784.7	54764.9		128655	116620	45591.6	106507
KAI8123438.1	10579.4	752853	1.25834e+06	1.90946e+06	5.09478e+07	4.60394e+07	5.29781e+07	3.73893e+07	2.74084e+07	3.94478e+07	5.0122e+07	1.42507e+07
KAI8123435.1	2.54475e+07	1.65274e+07	1.91154e+07	9.85411e+06	798138	2.65112e+06	1.58891e+06	2.96463e+06	1.61871e+07	8.62368e+06	1.1181e+07	9.1257e+06
KAI8123421.1	357714	3.71971e+06	2.5339e+06	798197	237941	2.91788e+06	2.24746e+06	3.66177e+06	3.59661e+07	7.12382e+07	4.60155e+07	5.90182e+07
KAI8123418.1	283220	136553	197430	147663				28165.7	75831.9	91531.5		60717.1
KAI8123414.1	85546.2	1.04647e+06	832333	118638		353160	70280	380904	1.69091e+07	3.34228e+07	2.14977e+07	2.78243e+07
KAI8123404.1	3.79554e+06	3.18852e+06	5.7471e+06	1.74288e+06	507897	294824	341685	537813	1.24423e+06	980455	1.10992e+06	824948
KAI8123397.1					84285.4	117898	70170.6	120438	419939	373750	970961	397189
KAI8123389.1						388797	373136	647620	679518	1.19011e+06	1.31967e+06	932709
KAI8123369.1		799729	547279	929353					210917
KAI8123345.1	396286	270874	657797	263551	68822.8	72323.1	97539.4	100938	412498	263738	395707	280396
KAI8123341.1	1.00282e+06	819127	976373	365212		51709.9		97510.7	299433	393748	161307	160905
KAI8123321.1	341787	368950	292525	710420					1.47672e+06	1.91271e+06	1.53799e+06	1.99779e+06
KAI8123318.1	762009	325510	374783	265919	67204.1	104299			298618	342108	133229	210115
KAI8123313.1	198031	128455								373782	274081
KAI8123298.1	158096	549632	1.19968e+06	1.32034e+06				141198	474110	1.27607e+06	962528	1.17254e+06
KAI8123283.1	5.21704e+06	4.06549e+06	3.25334e+06	2.94914e+06	179844			123170	2.56548e+06	2.40865e+06	1.51151e+06	2.29876e+06
KAI8123279.1	433777	303200	381636	408887					347102	479097	270597	511706
KAI8123278.1	6.10136e+06	5.31309e+06	3.31747e+06	2.34659e+06		370930	336670	891923	3.76486e+06	2.93669e+06	1.04093e+06	2.42367e+06
KAI8123275.1	4.43115e+06	2.53015e+06	4.61848e+06	1.69216e+06	141709	259932	426435	607405	2.33584e+06	2.10649e+06	2.47218e+06	2.60901e+06
KAI8123274.1	5.31914e+06	4.06456e+06	5.91629e+06	2.12163e+06	1.69981e+06	3.31086e+06	986229	2.5953e+06	3.10788e+06	2.23209e+06	2.46826e+06	2.7906e+06
KAI8123265.1	458229	398446	464440	274264					324276	509479	338152	775574
KAI8123257.1	6.93875e+06	4.39641e+06	3.19362e+06	1.92004e+06	146550	439711		623337	2.40257e+06	2.32275e+06	1.48513e+06	2.11431e+06
KAI8123255.1	816410		708218	500910					744022	681287	257178	519312
KAI8123254.1	2.38762e+06	310164	308400						75372.3		330033
KAI8123244.1	683312	951276	1.02953e+06	1.51161e+06		223495		242856	1.15871e+06	1.62285e+06	661770	1.17589e+06
KAI8123238.1				112522					162266	170084	149561	118337
KAI8123226.1	3.76558e+06	4.39642e+06	4.70917e+06	2.70514e+06	102404	227810			654942	459229	318498	277327
KAI8123209.1	339946	551475	1.02992e+06	61333.6	134419	58141			204585	20925.5	257058
KAI8123132.1	149612	49494.7	80762.1	9146.8						51312.5	53676.2	42462
KAI8123119.1	300299	226391	427493	210361		41782.4	23580.9	65400.6	221884	308298	217314	272511
KAI8123103.1	1.3468e+06	1.52963e+06	2.37844e+06	2.56522e+06	115062	140285	140507	258153	2.35115e+06	4.71565e+06	3.65678e+06	4.87623e+06
KAI8123099.1	178854	185921	282916	219393					192485	272483	90398.5	179853
KAI8123098.1	2.46405e+06	3.33246e+06	2.27992e+06	982182		147123	71248.2	67852	458188	160674	285690	183715
KAI8123078.1	1.33951e+06	802794	1.93534e+06	1.52702e+06		23819.7	38145.6	90803.4	489988	869643	717140	290655
KAI8123076.1	1.20338e+07	1.04255e+07	2.28018e+07	2.53232e+07	1.25669e+06	1.4836e+06	2.37445e+06	5.48914e+06	1.65317e+07	2.41058e+07	2.23569e+07	2.78747e+07
KAI8123052.1	4.89541e+06	2.347e+06	3.28398e+06	1.77841e+06	393214			126319	3.7669e+06	2.39513e+06	1.37976e+06	2.25082e+06
KAI8123048.1	2.7872e+06	3.36072e+06	2.77975e+06	1.5164e+06	161909	411375	244450	338005	1.7215e+06	812454	745266	217850
KAI8123007.1	6.18655e+06	8.49681e+06	8.11488e+06	5.94592e+06	151394	301810	934359	575229	2.74721e+06	3.36257e+06	3.93033e+06	3.00447e+06
KAI8122999.1	389568	297883	432247	154484					233646	614295	188008	688635
KAI8122964.1	1.18936e+07	9.22539e+06	4.88247e+06	3.36748e+06	330210	1.17487e+06	1.13867e+06	1.27103e+06	4.21647e+06	4.02594e+06	3.7386e+06	5.42067e+06
KAI8122961.1	945171	732158	860400	799820				111578	389115	597170	559033	915651
KAI8122937.1	799778	487504	434107	312902
KAI8122936.1												32566.4
KAI8122935.1	623918	544009	262019	216334					335613	309730	175422	279284
KAI8122930.1	49942.9											26148.8
KAI8122885.1		51604.2							292211	433240	479746	701138
KAI8122873.1	1.71346e+06	2.16656e+06	1.70179e+06	2.51798e+06					2.24295e+06	2.6962e+06	1.77474e+06	2.46983e+06
KAI8122863.1	259691	347929	444786	287259				60212.7	244232	399577	151942	323191
KAI8122851.1	5.92884e+06	5.48319e+06	4.36947e+06	2.61315e+06	277348	580040	128893	618981	2.23213e+06	1.34815e+06	1.00496e+06	1.59746e+06
KAI8122817.1	1.36081e+07	1.24631e+07	1.54888e+07	1.04688e+07			37089.8	384137	4.12167e+06	4.42625e+06	3.97489e+06	3.80401e+06
KAI8122810.1	1.62933e+06	1.56933e+06	2.65036e+06	3.61775e+06		68370		402470	4.25487e+06	5.54209e+06	2.90826e+06	6.54546e+06
KAI8122808.1	8.72314e+07	6.11807e+07	5.09868e+07	3.82498e+07	9.24863e+06	1.34501e+07	1.00379e+07	1.14176e+07	4.20328e+07	3.96824e+07	3.37429e+07	4.63573e+07
KAI8122765.1	647610	410617	291247					45406.1	208248	133778	149911	35738.8
KAI8122741.1	621300	415563	305560	159403					283932		194567
KAI8122729.1	395697	353646	237706	83203.7		10620.5	7163.51	9783.1	123597	237352	130580	183215
KAI8122709.1									489448
KAI8122699.1	88519.1		73553	95564.7					155978	206605	86153	231249
KAI8122689.1	1.128e+06	2.70785e+06	1.676e+06	3.47073e+06	685912	865257	1.33614e+06	909605	4.72178e+06	6.52596e+06	7.64833e+06	7.84848e+06
KAI8122677.1	959479	609292	224040	134396
KAI8122670.1	4.41011e+06	3.06447e+06	1.36484e+06	517458	188438	416499	391532	361368	987830	948863	592425	260208
KAI8122652.1	617760	464572	1.31994e+06	643765	461118	342721	814540	589738	2.46316e+06	1.92383e+06	2.1694e+06	2.09545e+06
KAI8122615.1	400789	164202	70876	100667					216786	112230	152328
KAI8122573.1	2.9439e+06	2.00398e+06	3.7692e+06	2.38359e+06	183531	368547	115679	260762	1.29532e+06	1.08232e+06	711835	393808
KAI8122566.1	1.59554e+06	1.1063e+06	1.22235e+06	3.34629e+06	106392	583522	174329	1.65607e+06	5.19721e+06	8.48834e+06	4.75202e+06	6.65949e+06
KAI8122563.1	50520.7	81228.5	119823	608766	23121	66577.7		139299	519480	1.03555e+06	781736	1.58654e+06
KAI8122533.1		188120	216765	379809	2.09312e+07	1.55302e+07	2.23661e+07	7.45e+06	5.08251e+06	6.55498e+06	7.79638e+06	5.16763e+06
KAI8122496.1	567777	1.05653e+06	1.3465e+06	1.47421e+06	103940	370195	209916	738684	2.96074e+06	5.05431e+06	2.61658e+06	3.52788e+06
KAI8122487.1	756692		168203	747026		39590.9		93333.7	849539	969640	392684	1.08793e+06
KAI8122475.1				30840.1				72269.8	118743	39664.1	101343	172904
KAI8122452.1	1.59888e+06	1.2323e+06	1.98959e+06	917860				54503.3	77206.8	174014	220444	114450
KAI8122442.1	2.13301e+06	1.20467e+06	1.6172e+06	1.3569e+06	89927.2	63110.2		139740	362029	308738	244557	398965
KAI8122438.1	196620	109381	56733.6	103963					66463.1	45793.4	170752	68959
KAI8122424.1	48179.8	29380.2		24125.4
KAI8122405.1		120750	165916	104213					94902	103375	53134.1	126582
KAI8122365.1			83225.8
KAI8122364.1	2.12719e+06	2.12868e+06	1.78348e+06	5.19628e+06	155571	492967	387109	362227	5.86588e+06	1.10494e+07	5.24576e+06	9.2577e+06
KAI8122356.1	658157	699009	1.01815e+06	1.28814e+06					965638	598418	258983	498364
KAI8122353.1	265197	535202	648508	1.77022e+06					2.37158e+06	4.95987e+06	3.07372e+06	5.3726e+06
KAI8122333.1	3.80151e+06	2.71909e+06	2.02699e+06	1.19824e+06	25657.5	71318.1		10117.9	1.21334e+06	875750	695655	621522
KAI8122318.1	512065	550931	307612	540632				157744	779238	1.37984e+06	917804	1.23249e+06
KAI8122275.1	5.06991e+06	4.76483e+06	4.79944e+06	1.47238e+06			68620.5		484556	325581	333486	158127
KAI8122249.1	615390	18677.5			4847.58			10140.1	17993.6	8245.39	17588.3
KAI8122247.1		310634		221138
KAI8122223.1			475737	605010
KAI8122222.1	9.7205e+06	7.34032e+06	8.0928e+06	4.06626e+06	331771	413585	530238	483582	3.26224e+06	2.02182e+06	2.79248e+06	3.26089e+06
KAI8122220.1									113004	121494	101418	124149
KAI8122204.1	2.42458e+07	2.03112e+07	1.37006e+07	1.21727e+07	1.60913e+06	2.78422e+06	1.76398e+06	2.27394e+06	1.25675e+07	8.78501e+06	9.59383e+06	9.50316e+06
KAI8122184.1				22069.5		8806.12		14937.1	13592.9	26714.7	29504.8	32840.8
KAI8122156.1										393889	184186	450185
KAI8122146.1	52915.7		56323.2	323726	36942	250252	34020.9	179535	451460	550616	488699	76141.1
KAI8122143.1	1.53482e+06	1.27885e+06	1.04471e+06	688207	27745.4				266570	644606		327235
KAI8122134.1	221857	357424	351950	318287	69802.5	101121		143888	450294	730523	277983	211245
KAI8122088.1	338742	553743	155276	130781		82866.9			55566.2
KAI8122070.1	228714	214855		205794					152337
KAI8122018.1		151206	167929	237464				297327	412563	719912	212214	503916
KAI8121987.1	34506.9	25209.2	24720.3	32251.8				29226	61268.3	107077	79422.5	143171
KAI8121967.1	277749	345004	357930	198517					169897	236437	227455	319646
KAI8121953.1	9.81265e+06	8.63075e+06	2.34903e+06	2.37094e+06	841071	1.83082e+06	1.11044e+06	1.65971e+06	3.08586e+06	2.36116e+06	3.07669e+06	1.8397e+06
KAI8121937.1	551554	451350	1.02839e+06	418092					134472	160227	130486	288609
KAI8121912.1	2.48851e+07	1.48565e+07	1.70129e+07	1.10792e+07	1.20761e+06	1.567e+06	712751	2.18991e+06	1.49125e+07	1.00478e+07	9.69838e+06	1.33226e+07
KAI8121906.1	2.93284e+06	2.20967e+06	4.81417e+06	1.25648e+06	304381	354319	50563.7	349473	1.18397e+06	517169	999810	821826
KAI8121904.1	6.85396e+06	3.81515e+06	5.42924e+06	2.80142e+06	82528.9	176575		70349.8	1.15928e+06	569511	352916	216886
KAI8121900.1	67591.9	151206	56331.7	39446.6		30261.2			51934.7	89414.3	170271	41573.2
KAI8121886.1	1.95657e+06	348265	2.88509e+06	1.72215e+06					512529	734992	1.08245e+06	1.23908e+06
KAI8121846.1	2.88247e+06	2.94695e+06	2.56591e+06	1.61045e+06	241182	162061	183572	221958	1.66271e+06	1.08014e+06	929111	690233
KAI8121845.1	1.36717e+07	1.17519e+07	1.83957e+07	1.74691e+07	3.52587e+06	4.01262e+06	6.72365e+06	5.10373e+06	1.23342e+07	1.44905e+07	1.87491e+07	1.60075e+07
KAI8121819.1	193323	123084	160454	116882						129817	99651.4	132962
KAI8121805.1	1.16678e+06	1.78877e+06	1.5626e+06	1.20732e+06	48450.4			58685.1	368550	682180	165137	823882
KAI8121780.1			60086.2	193827					132069	167167		68646.8
KAI8121769.1		285671	158244	518171	32549.6			221954	786082	1.71213e+06	1.21294e+06	1.5867e+06
KAI8121734.1	8.78617e+06	5.54859e+06	8.94528e+06	1.59565e+07	964733	1.63024e+06	1.00312e+06	2.00385e+06	1.75648e+07	1.85116e+07	1.94315e+07	1.82133e+07
KAI8121730.1		232092	81958.2	436341				60827.3	784466	895166	1.22804e+06	1.12601e+06
KAI8121728.1	2.50207e+06	1.56879e+06	1.97451e+06	613120	135925	183372	190680	281531	700387	509179	376988	691228
KAI8121693.1	861591	740696	861828	611615		117610		145728	1.19105e+06	1.25018e+06	478903	783387
KAI8121670.1	7.99766e+06	6.10683e+06	5.86848e+06	2.39433e+06	604477	361779		795917	2.87027e+06	3.15008e+06	1.59803e+06	3.45243e+06
KAI8121669.1	148964	180950	192722	214169					313480	387481	213234	205963
KAI8121655.1		124519							53432.8	72585.7		84794.1
KAI8121589.1	321951	919377	859781	605421	801408	403506	233545	233495	1.76821e+06	957123	557610	582744
KAI8121551.1	1.76593e+06	1.20241e+06	1.42385e+06	757259		123506		156341	1.57405e+06	2.9144e+06	1.32702e+06	3.35313e+06
KAI8121549.1	6.33758e+07	4.85783e+07	5.44347e+07	3.21359e+07	9.7696e+07	7.53634e+07	1.2507e+08	7.38913e+07	4.59037e+07	3.31794e+07	3.13108e+07	2.42506e+07
KAI8121545.1	592880	447319	497847	165017					349319	361102	318536	335460
KAI8121543.1	94471.9	49021.3	139099	238936		136570		212394	751709	1.33443e+06	424117	838198
KAI8121537.1	677524	604524	422665	431958		146166		162731	408065	213002	331737
KAI8121531.1	3.52196e+06	1.43522e+06	373622	69647.9	105606	99116	72626.7	88528.7	3.19661e+06	767819	1.98384e+06	961834
KAI8121508.1						34729.9	51889.1	45343	16475.8	62924.8	641171
KAI8121488.1		19410.6				112121	116230	718863	358717	386787	1.33884e+06	323394
KAI8121474.1	132598								265662	337692	362384	597706
KAI8121449.1	64758.9	43295	51891.9	18475.6						11902.8
KAI8121430.1	3.88702e+06	3.93698e+06	4.28813e+06	3.97341e+06	580723	1.05902e+06	1.11951e+06	2.93545e+06	7.0017e+06	7.04557e+06	4.79481e+06	6.16542e+06
KAI8121429.1	4.29915e+06	3.78104e+06	2.38021e+06	1.47488e+06	253908	395120	444867	330790	1.96915e+06	1.30929e+06	1.63566e+06	629917
KAI8121416.1	7.96803e+06	3.68787e+06	8.04953e+06	7.66898e+06	1.38774e+06	2.19319e+06	1.1866e+06	1.49264e+06	5.45345e+06	8.25265e+06	5.58342e+06	7.67179e+06
KAI8121415.1				258568					166985	162117		104589
KAI8121404.1	179926			222049					320074	260585	390799	264385
KAI8121401.1	8.69905e+06	6.80483e+06	3.10124e+06	2.66081e+06	477127	1.193e+06	934847	979483	4.40164e+06	3.77365e+06	3.9769e+06	2.9099e+06
KAI8121373.1	197232	248876	181292	95823.3	440589	711236		234823	94532	139014	91559	173264
KAI8121372.1	267524	142744	336202	476164	49866.9	98012.2	82331.8	23988.7	129865	61176.7	25284.1	38231.6
KAI8121365.1			378412							77238.4
KAI8121320.1	251831	286839	340584	23638		20126.6			470414	599042	395106	695422
KAI8121312.1									63868.3	52971.3	69441	73829.6
KAI8121307.1	455555	254731	563824	126908					141391	107564	75502.2	95314.4
KAI8121300.1	282131	728342	999905	558748			58800		544903	551439	501592	958852
KAI8121275.1	768026	589268	334496	239201		34470.5			205378	186359
KAI8121271.1	1.60387e+06	1.54783e+06	2.67714e+06	3.66064e+06		122668	71790.7	169013	4.66312e+06	4.75948e+06	5.41822e+06	6.63365e+06
KAI8121244.1		176760	123810	223075					161239	195422	184638	281339
KAI8121236.1	1.52087e+06	1.13669e+06	1.50165e+06	2.90332e+06		152632	35641	318782	1.5213e+06	3.98338e+06	1.47438e+06	2.82305e+06
KAI8121203.1	5.10659e+06	5.08891e+06	6.16318e+06	3.65705e+06	3.99313e+06	1.36824e+06	1.01264e+06	2.09342e+06	1.01693e+07	1.14438e+07	1.05767e+07	1.14006e+07
KAI8121193.1	1.14476e+06	550217	338619	140975					93881.1	60421.5	58455.3
KAI8121191.1	163423	576675	243249	900802			66494.1	61948.7	776177	1.25238e+06	1.20698e+06	1.56858e+06
KAI8121179.1	668366	588084	505339	234698					521113	658766	381858	634080
KAI8121176.1	382061	242479	323433	235019					240066	274844	201980	334952
KAI8121144.1				130848					435969	633195	523588	881063
KAI8121096.1	380200	417373	280204	205585					1.09885e+06	379380	489973	441813
KAI8121095.1	938920	652541	1.91056e+06	3.16674e+06	94095.6	573407	564785	1.03636e+06	2.71898e+06	4.50512e+06	3.9446e+06	4.03495e+06
KAI8121092.1	1.82607e+06	2.5508e+06	2.57905e+06	1.15587e+06	1.18344e+06	1.70144e+06	1.56951e+06	3.89627e+06	1.32834e+07	5.22618e+06	7.87024e+06	5.90501e+06
KAI8121085.1	161988	683503	441237	726785		128632		232564	1.68509e+06	3.6722e+06	1.56629e+06	2.55735e+06
KAI8121071.1	679263	846942	1.23271e+06	494519	191374	90359.7	139537	110192	385732	385814	296635	496631
KAI8121053.1	591941	575289	350703	1.49214e+06		93166.5			1.11845e+06	1.15782e+06	1.37353e+06	1.08544e+06
KAI8121042.1	226484	196572	189320	413359	47128.1	101735		173496	634862	1.09665e+06	539310	1.09904e+06
KAI8121041.1				274997				197060	429436	913728	53840.6	198510
KAI8121014.1	3.94041e+06	2.19012e+06	1.27601e+06	1.15829e+06		504579	290245	310825	1.85862e+06	719991	1.77779e+06	1.28444e+06
KAI8120969.1	874683	1.36709e+06	2.00878e+06	1.68984e+06		163842		234611	1.33583e+06	2.35041e+06	2.3504e+06	2.2954e+06
KAI8120961.1										129964	104909	128778
KAI8120905.1	996027	1.01178e+06	1.02952e+06	791493	78187				938260	928208	520703	521812
KAI8120899.1	128755	126060	97389.7	480854	282477	756993	985064	594182	2.31777e+06	2.01659e+06	3.513e+06	1.92587e+06
KAI8120883.1	1.76131e+06	1.11173e+06	4.48122e+06	1.4785e+06				406282	2.00737e+06	1.65036e+06	1.56818e+06	2.49099e+06
KAI8120876.1				294836					295840	434666	287365	627841
KAI8120868.1	1.11552e+07	5.37592e+06	3.32695e+06	2.98628e+06	975749	1.96281e+06	1.00762e+06	2.77956e+06	1.23594e+06	512470	1.36746e+06	274656
KAI8120862.1	2.27104e+07	1.44832e+07	6.02965e+06	5.42358e+06	1.11739e+06	4.52271e+06	2.43325e+06	6.60279e+06	1.16138e+06	292991	2.60402e+06	548617
KAI8120858.1	713770	385469	113252	127560	32819.5
KAI8120822.1	3.5183e+08	2.39844e+08	3.20793e+08	1.6952e+08	3.96424e+07	7.78584e+07	4.99309e+07	7.82906e+07	1.8256e+08	1.00029e+08	1.18086e+08	1.37595e+08
KAI8120802.1	719426	489553	442947	352572					202775	252680	110322	179342
KAI8120776.1									222595	297539		180574
KAI8120759.1			394833	163341		30242.8		93346.3	314880	606935	382168	798200
KAI8120740.1				62986.3					343062	463597	388794	456071
KAI8120728.1	4.8453e+06	2.85441e+06	5.22139e+06	2.83354e+06	67535.5	150371		73134.9	1.43304e+06	754218	950701	843519
KAI8120724.1				232164					51642.6		100853	119581
KAI8120706.1	479897	507277	574630	567354					520523	602961	556597	710286
KAI8120705.1	731063	361082	835682	465606	127094			142843	681436	1.21836e+06	427654	927757
KAI8120700.1	843186	697341	1.51632e+06	444971
KAI8120677.1	1.16465e+06	1.03652e+06	584177	309686					88112
KAI8120671.1	1.77407e+07	1.87853e+07	7.5153e+06	6.95551e+06	1.16091e+07	1.00257e+07	2.31296e+06	1.01128e+07	1.57125e+07	1.02545e+07	1.0427e+07	1.06704e+07
KAI8120643.1	938745	582883	673274	276598		43407.8		34188.3	537106	432895	299450	512868
KAI8120628.1	1.50353e+06	1.05899e+06	1.19391e+06	708159	46874.8	355387		345422	537473	264770	426759	269340
KAI8120610.1	3.70034e+06	2.27599e+06	2.921e+06	1.84075e+06	187086	730376	364736	214776	2.5353e+06	1.45008e+06	926505	928988
KAI8120604.1	3.39635e+06	1.39232e+06	2.50757e+06	1.54892e+06		74996.9		341946	2.30197e+06	4.84391e+06	3.04699e+06	4.9904e+06
KAI8120558.1	1.92525e+07	1.63564e+07	1.37974e+07	8.06489e+06	2.98882e+06	3.31785e+06	2.70626e+06	3.93389e+06	9.19712e+06	5.6414e+06	7.75059e+06	6.69138e+06
KAI8120543.1									107617	176680	125289	159966
KAI8120519.1		135698		65938.8	321846	227635	249533	269787	1.16208e+06	669573	887635	429388
KAI8120501.1	360517	115401	62139.4	52828.3			7711.32	32673.6	109937	32817.2	89541.1	76144
KAI8120453.1	1.43265e+06	370043	1.04422e+06	548271				63500.5	346402	289181	132844	271087
KAI8120451.1	2.89784e+06	2.04844e+06	2.52955e+06	1.65189e+06		119061	46612.4	258299	1.26117e+06	1.27489e+06	957303	2.4147e+06
KAI8120447.1	290117	244697	175676	112302		38623.4			389207	165555	181920
KAI8120417.1	1.0468e+06	1.2743e+06	1.24375e+06	585902								251017
KAI8120409.1				28350.9					113054	147286	93643.1	142142
KAI8120391.1	1.58029e+07	1.09994e+07	8.82529e+06	4.80557e+06	242927	1.19212e+06	770615	1.29656e+06	6.4885e+06	3.76893e+06	5.42754e+06	5.46416e+06
KAI8120384.1	1.8639e+06	2.26975e+06	2.89163e+06	3.70734e+06		78210	103243	369394	3.61487e+06	4.614e+06	3.45062e+06	5.79606e+06
KAI8120352.1	132324	89702.3	131656	187761					179202	425747	327195	376568
KAI8120344.1	2.75561e+06	2.22361e+06	2.96466e+06	1.7138e+06		566927	422826	305324	3.78703e+06	2.46191e+06	1.2533e+06	2.43479e+06
KAI8120340.1								53252.4	105062
KAI8120330.1	1.05689e+06	1.01517e+06	1.45797e+06	2.29495e+06		89573.8		48346	2.07885e+06	2.28808e+06	1.08059e+06	1.68284e+06
KAI8120324.1			115927	20685.3	26616.2				105272	76926.1	99184	88558.7
KAI8120308.1	133742	179766		837650		158195		164687	1.52278e+06	1.9589e+06	2.24179e+06	2.25856e+06
KAI8120302.1	1.91301e+06	811848	1.27702e+06	345028	176612	140009	37162.5	83664.9	842004	777693	420378	854613
KAI8120301.1		155151	236014	215250						230722		199438
KAI8120298.1	134534	170509	391048	555505					893213	802297	1.17226e+06	1.13748e+06
KAI8120246.1	647530	628602	398000	1.19549e+06		117398		130558	1.3037e+06	1.89746e+06	1.40839e+06	1.71384e+06
KAI8120245.1	1.22909e+06	3.63701e+06	3.21774e+06	6.3598e+06	127123	530551	472399	1.83297e+06	3.0748e+06	4.931e+06	3.56977e+06	3.83483e+06
KAI8120232.1				62533.7		184177	80422.9	158931	346481	102443	143655	52613.9
KAI8120202.1	2.29842e+06	1.94272e+06	3.21311e+06	1.3046e+06		67293.4		409457	1.65274e+06	1.78768e+06	865608	1.73701e+06
KAI8120181.1	1.72904e+06	915918	445772	458168		57593			171563
KAI8120177.1	1.22821e+07	5.35982e+06	7.96844e+06	4.34852e+06	389697	163912	248137	131968	2.55745e+06	1.05387e+06	1.67252e+06	1.16654e+06
KAI8120176.1	384788	506430	645517	402232					367199	237923		180815
KAI8120156.1	184471	212713		470002	101627	301443		616412	1.08544e+06	1.68583e+06	1.26777e+06	947982
KAI8120144.1									99405
KAI8120143.1	57346.4	20798		49426.4				47823	128205	83734.2	214481	109830
KAI8120138.1	20010.4			15939.9	227198	604070	301776	952227	823803	330879	1.07941e+06	360353
KAI8120130.1		231292	283070			65445.5		155848	346991	371438	256143	505130
KAI8120121.1	1.78351e+07	1.25237e+07	8.30168e+06	5.60093e+06	382176	1.3923e+06	1.52914e+06	1.20695e+06	6.66465e+06	2.89957e+06	4.31313e+06	4.56544e+06
KAI8120048.1	312604	196619	254559	213220				58747.3	492091	731059	615712	805780
KAI8120045.1	230748	83293.5	72126	258877	1.8096e+07	1.3142e+07	2.5778e+07	1.81561e+07	3.06942e+06	3.92367e+06	6.15004e+06	3.4993e+06
KAI8120043.1	217620	304635	272755	106604					160714	158510	51008.7	175457
KAI8120035.1	3.95811e+07	2.00603e+07	1.28682e+07	8.52198e+06	2.28956e+06	2.73727e+06	2.08441e+06	3.10135e+06	1.34694e+07	9.22122e+06	7.26327e+06	8.81738e+06
KAI8120032.1	614449	850738	513889	270596					289416	296710	295272	462287
KAI8120018.1	2.24044e+06	2.15947e+06	3.46543e+06	3.40952e+06		246256	311851	963110	3.44888e+06	3.86137e+06	3.13115e+06	3.62541e+06
KAI8120017.1	144848	168990	238803			69508.6				188833	117602
KAI8120013.1	1.54759e+07	1.21178e+07	7.49855e+06	5.94843e+06	522637	2.94455e+06	1.87198e+06	2.03952e+06	1.00568e+07	6.6659e+06	6.87331e+06	7.64699e+06
KAI8120002.1	1.07389e+06	782025	783097	630137					349841	728173	244556	538918
KAI8119967.1									37815.3	84398.9	149239	106750
KAI8119950.1				24494						18819.6
KAI8119930.1	1.86674e+06	4.30567e+06	1.88566e+06	2.53e+06		115793			4.45284e+06	5.56418e+06	4.30324e+06	6.66541e+06
KAI8119914.1	235448	82834.4	355548	321291					895784	1.60526e+06	943722	1.85275e+06
KAI8119904.1	1.22075e+06	1.32511e+06	276507	620246		399751	12640.7		687359	601822	1.02697e+06	1.12145e+06
KAI8119884.1	5.71119e+07	5.93876e+07	3.76089e+07	2.44622e+07	6.06003e+06	1.11511e+07	7.33582e+06	1.7113e+07	4.61622e+07	4.57638e+07	3.99769e+07	5.10813e+07
KAI8119867.1									69881.2	174262	101022	146839
KAI8119842.1				98281.9						93361.5	41333	46686.9
KAI8119811.1	1.51047e+06	1.15149e+06	496727	1.97598e+06	167314	250429	411870	594120	4.01556e+06	6.65531e+06	4.64522e+06	5.58761e+06
KAI8119803.1	2.39366e+06	3.41692e+06	2.32064e+06	1.98102e+06		56803.1		67885.1	1.64236e+06	1.7276e+06	941407	917671
KAI8119799.1	511605	592000	728081	255093	48720.6		457904	295014	883934	620918	587893	783494
KAI8119796.1	247676	350730	223502						133264	107174
KAI8119786.1	1.34359e+07	9.09727e+06	1.35125e+07	1.16256e+07	91820.1	857179	294733	2.04671e+06	1.1196e+07	1.48222e+07	1.05608e+07	1.84745e+07
KAI8119776.1	962835	535425	1.27599e+06	590234					280819	59396	296270	169026
KAI8119762.1	4.41668e+07	2.71906e+07	3.54422e+07	2.27499e+07	5.26228e+06	6.09395e+06	4.65007e+06	6.08255e+06	2.38985e+07	1.1607e+07	1.4604e+07	1.19175e+07
KAI8119755.1	1.16751e+07	1.0085e+07	7.88236e+06	5.27296e+06	831050	1.3593e+06	280203	949647	5.12872e+06	5.2392e+06	4.96386e+06	4.64996e+06
KAI8119738.1	219263	386613	386341	151807					178009	290943	288990	314729
KAI8119719.1	680910	597314	3.36003e+06	1.47994e+06	1.40332e+07	8.03355e+06	1.31236e+07	9.85998e+06	7.29199e+06	4.54635e+06	8.71659e+06	3.98293e+06
KAI8119718.1	3.98864e+06	2.6229e+06	4.05074e+06	2.69942e+06	5.76287e+06	1.11448e+07	1.99411e+07	1.70919e+07	4.84266e+06	3.93692e+06	5.58716e+06	3.7373e+06
KAI8119716.1	118504	133875	175567	27936.5	28138			24620.3	97658.6	61300.3	69555.2	60777.8
KAI8119712.1	3.04258e+07	2.52433e+07	3.44998e+07	2.17589e+07	7.22759e+07	7.35218e+07	1.09852e+08	1.11597e+08	4.85275e+07	4.07748e+07	6.0588e+07	4.32149e+07
KAI8119703.1	3.8966e+06	3.17901e+06	3.30948e+06	1.07692e+06				98395.7	224334	203936	288897	498872
KAI8119700.1	150215	129414	109611	104309					123505	142986	134238
KAI8119675.1	152340		172279	287827					319962	919790	455353	386115
KAI8119674.1	2.09696e+06	1.97717e+06	1.80912e+06	380604	99205.1	299586	112447	279401	1.29149e+06	1.13598e+06	765427	729736
KAI8119661.1	2.85158e+07	2.12701e+07	2.66106e+07	1.95232e+07	776928	1.96039e+06		699586	2.11652e+06	160511	5.17688e+06	352451
KAI8119648.1	8.48706e+06	9.06915e+06	9.41813e+06	1.01697e+07	1.20631e+08	5.16242e+07	6.87942e+07	6.33477e+07	7.28799e+07	5.43218e+07	6.68033e+07	5.34086e+07
KAI8119645.1	4.17275e+07	4.50344e+07	5.22659e+07	3.63423e+07	2.12609e+08	1.82769e+08	2.26769e+08	2.09835e+08	9.28179e+07	9.53692e+07	9.54268e+07	7.76624e+07
KAI8119641.1	5.06854e+07	3.73336e+07	1.65804e+07	1.49666e+07	6.77333e+06	1.10918e+07	6.51868e+06	1.66005e+07	5.20661e+06	3.16406e+06	6.51812e+06	2.86971e+06
KAI8119640.1	2.4982e+06	2.07295e+06	974186	1.27088e+06	117501	1.93924e+06	754438	2.48578e+06		104850
KAI8119639.1	3.25882e+07	1.82772e+07	9.76351e+06	6.93739e+06	1.75317e+06	3.95657e+06	2.30618e+06	6.97131e+06	2.03679e+06	1.1943e+06	2.73556e+06	993604
KAI8119632.1	1.8732e+07	1.60869e+07	1.51847e+07	8.39122e+06	1.4772e+06	3.63726e+06	1.69991e+06	3.27863e+06	2.83626e+07	1.98259e+07	1.4554e+07	2.11991e+07
KAI8119630.1	1.6277e+07	1.39596e+07	9.30733e+06	7.11467e+06	1.79276e+06	2.00306e+06	999287	3.679e+06	2.32286e+07	1.39277e+07	1.49724e+07	2.07396e+07
KAI8119619.1	409327	648652	767596	341249	375127	511006	843163	703550	968452	304181	631103	588636
KAI8119600.1	243609	212597	308827	316423					169593	231267	102795	202152
KAI8119593.1		268305	450185	316855
KAI8119588.1	1.08062e+06	725972	695168	267662	53782.5	30285.6		70374.6	179121	60946.1	33202.2	15860.6
KAI8119583.1		76909.2							99200.1		92653.9	96210.5
KAI8119576.1	479486								259318	431046	305988	710568
KAI8119568.1	5.23274e+06	3.70779e+06	1.85615e+06	840902	347955	635026	581100	994391	387531	188086	376732	216596
KAI8119566.1	1.98123e+06	1.20663e+06	397082	426199		169383		132679	77854		54223.4
KAI8119559.1	1.00748e+07	7.24425e+06	8.89667e+06	8.77973e+06	114441	629928	220756	1.46301e+06	9.78912e+06	6.03327e+06	5.00278e+06	7.78977e+06
KAI8119555.1	2.64633e+06	2.52309e+06	2.8909e+06	1.54508e+06	2.02673e+06	578226	1.12158e+06	1.17557e+06	2.74514e+06	1.66596e+06	2.12665e+06	2.01288e+06
KAI8119539.1								94824.6	168990	246112	128892	247425
KAI8119528.1									4425.74	10298.3
KAI8119527.1	79263.6		64323.7						67953.1	123792	48661.8	130676
KAI8119523.1	433018	162856	835065	484913					473240	836181	544369	479804
KAI8119509.1		58576.5		156982				39634.1				290573
KAI8119505.1				38468.8					36559.7			48989.3
KAI8119485.1										255455
KAI8119481.1		64682.1		34359.9					46639.3	124342	58616.6	90544.4
KAI8119448.1	1.28571e+06	984565	959814	595962	147307	151249	88471.4	65637.9	599634	306411	468596	394133
KAI8119444.1	2.97792e+06	2.90274e+06	2.08471e+06	951134	60956.2	440731	443991	158970	1.99857e+06	580186	956545	674938
KAI8119436.1		50501.5	67324.5						78055.9	108752	82773.6	113451
KAI8119420.1	3.47036e+06	3.50698e+06	1.5739e+06	3.4257e+06	275853	420378	376777	459631	3.50798e+06	4.21153e+06	2.76161e+06	3.51024e+06
KAI8119391.1	602341	520891	690295	397589	99339.1				312329	411218	283048	352270
KAI8119373.1	1.94645e+06	1.17028e+06	1.28619e+06	223792	73127	145357		186023		387395	517109	549182
KAI8119372.1	429316	327200	321408	199175		137431		197814	464403	577002	215705	401899
KAI8119355.1										97907.7	90071	126720
KAI8119312.1	581446	466554		170164	36027.1				192376	238497	184081	106546
KAI8119296.1	3.17762e+06	3.43131e+06	4.30334e+06	5.62535e+06	498326	548205	598476	863430	5.14041e+06	6.45636e+06	6.8974e+06	7.02626e+06
KAI8119289.1	1.39996e+06	1.23656e+06	998245	728467					491525	261269	757510	441323
KAI8119243.1	1.06277e+07	1.23957e+07	7.36162e+06	8.14461e+06	271152	1.11541e+06	1.09095e+06	1.09931e+06	6.32139e+06	5.80749e+06	5.1989e+06	5.34562e+06
KAI8119214.1	5.88557e+06	5.4014e+06	5.76419e+06	3.65447e+06	548076	1.00108e+06	106743	885081	4.28522e+06	2.75555e+06	3.07656e+06	3.43368e+06
KAI8119206.1	138912	106371	233309	86984.9			670957	22510.5	196249	407475	121289	189822
KAI8119190.1	7520.18		55305.5	31830.6					72750.3	138741		207264
KAI8119184.1	2.75686e+06	2.21772e+06	724988	1.04366e+06	2.26934e+06	4.44503e+06	4.31614e+06	5.99874e+06	6.50859e+06	6.23235e+06	8.32135e+06	5.85959e+06
KAI8119175.1	31646.3										69423.3
KAI8119166.1	936616	1.03555e+06	1.40513e+06	1.16921e+06					350754	962471	464785	673671
KAI8119159.1	371646	373570	863487	409100	1.89132e+07	1.46816e+07	1.86904e+07	1.18868e+07	1.63391e+06	1.13636e+06	1.49211e+06	1.23469e+06
KAI8119158.1		48319.1			3.34209e+06	2.15029e+06	2.20055e+06	1.91514e+06	269793	225656	292574	181682
KAI8119156.1	137099	387580	446926	554265	6.87667e+06	1.44236e+07	1.42257e+07	1.27992e+07	976118	726671	1.30967e+06	571330
KAI8119132.1	254632	308310	416699	275642		116258	103709	261095	666816	475318	349504	453632
KAI8119129.1	660336	668961	1.08624e+06	770834		198133		262034	716390	471499	530541	613886
KAI8119098.1	3.10819e+06	3.72752e+06	3.37313e+06	1.19924e+06	416269	784123	365367	578134	2.19885e+06	776237	2.44961e+06	728810
KAI8119094.1	315617	308344	213658	115888					72255.6	74628.9		58990.9
KAI8119089.1	103153								132796	179727	84220.6	152049
KAI8119087.1	704597		477690	166145					129381
KAI8119085.1	2.15585e+07	1.63256e+07	1.13965e+07	9.78847e+06	1.85493e+06	1.84252e+06	532084	1.26154e+06	1.17294e+07	1.12833e+07	7.68389e+06	1.06727e+07
KAI8119080.1				40685.9					110132	203027	97074.3	170693
KAI8119068.1	1.13589e+06	1.16714e+06	1.2989e+06	1.04207e+06		85331.1		90970	589900	1.1828e+06	724904	1.49648e+06
KAI8119029.1	1.43973e+07	1.13889e+07	1.64477e+07	8.25617e+06	1.01368e+06	899517	64799.9	955964	8.34861e+06	2.49057e+06	1.56375e+06	1.91463e+06
KAI8119027.1	3.36735e+06	1.65303e+06	1.17305e+06	888071	137006	37011.8			1.07675e+06	421969	595869	396616
KAI8119025.1	1.77455e+06	1.06894e+06	1.53741e+06	532144		294192		268757	1.39832e+06	267172	522489	1.02574e+06
KAI8119012.1	586486	242203	918642	406591		73309.6		80939.5	674458	444652	286958	599596
KAI8119006.1	3.20727e+06	1.56895e+06	2.30673e+06	1.89759e+06	5.44955e+06	4.89206e+06	8.27258e+06	4.24444e+06	6.42291e+06	5.84931e+06	9.34794e+06	6.38192e+06
KAI8118997.1	1.9049e+07	8.73741e+06	2.12613e+07	7.25977e+06	438699	3.12576e+06	894816	3.98473e+06	1.43779e+07	7.49082e+06	8.54744e+06	8.532e+06
KAI8118969.1	1.8776e+06	620903		3.35149e+06			81050.7	67707.2	982582	331505	3.97313e+06	863780
KAI8118957.1	9.06911e+07	6.08559e+07	9.25279e+07	5.22403e+07	8.27595e+06	1.0463e+07	7.77893e+06	1.10762e+07	5.7335e+07	3.19512e+07	3.86707e+07	3.13902e+07
KAI8118950.1	1.11187e+06	682207	1.19575e+06	723739					263089	221602	331244
KAI8118942.1		216064		169043
KAI8118932.1						14116.2		11108	82187.3	66988.7	40103.8
KAI8118928.1	968381	466576	836298	523020	137815	102319	35064.8	36843.4	1.12084e+06	657008	456850	714700
KAI8118914.1	1.19905e+06	1.08564e+06	116249	49297.7			34978.2		63734.1	55418	36236.4	572940
KAI8118913.1	825451	316821	683408	700959	392487	332681		337371	1.02948e+06	1.5177e+06	819569	1.24005e+06
KAI8118912.1	122747	97322.4		28465.6					142551			106244
KAI8118906.1	712638	426442	537133	204513					544009		79158.4	119069
KAI8118890.1	5.36401e+06	1.00927e+07	8.44983e+06	2.86809e+07	2.30993e+06	4.86542e+06	2.70744e+06	8.40547e+06	3.42444e+07	5.20384e+07	3.12536e+07	5.35321e+07
KAI8118888.1	1.64759e+07	3.14034e+07	4.13583e+07	1.54649e+08	1.55062e+07	2.43403e+07	2.01965e+07	4.59677e+07	1.74559e+08	2.22917e+08	1.60513e+08	2.50814e+08
KAI8118884.1	1.80316e+06	4.40388e+06	6.66477e+06	3.16335e+07	2.32358e+06	5.85993e+06	3.53469e+06	1.2717e+07	5.21482e+07	8.28572e+07	6.12608e+07	9.04597e+07
KAI8118882.1	4.38009e+06	9.61723e+06	1.21391e+07	6.36994e+07	4.75347e+06	1.13128e+07	7.82283e+06	2.26808e+07	7.22893e+07	1.15658e+08	7.57689e+07	1.11405e+08
KAI8118876.1	116824		135674									90539.8
KAI8118872.1	3.27152e+06	1.3289e+06	1.5803e+06	627674				103853	1.50345e+06	314353	915715	1.0477e+06
KAI8118868.1									140730	167883	225002	229550
KAI8118843.1		238814		519367
KAI8118819.1	2.82267e+06	4.09169e+06	1.44064e+06	9.96244e+06	1.03399e+06	1.41121e+06	698917	3.02533e+06	1.24229e+07	1.6268e+07	1.01325e+07	1.50774e+07
KAI8118799.1	3.52164e+07	3.10422e+07	3.96615e+07	4.31255e+07	4.05325e+06	5.09832e+06	2.95782e+06	7.55267e+06	2.90526e+07	2.13007e+07	1.46084e+07	1.97992e+07
KAI8118785.1		172733	153240	281132				47990.4	284759	285514	389362	211721
KAI8118782.1	108562	62973.6	70133.4	110706					76678.4	227149	105612	107538
KAI8118767.1	90956	87628.2	79224.8	105574				15312.4	195193	437122	411125	379386
KAI8118762.1			381548						587646	615409		831892
KAI8118761.1				77017					71004.7	77115.6	43830.4	40997.8
KAI8118742.1	207612		93140.3						93895	141656	94015.1	121781
KAI8118737.1			148096		92474				204475	218482	136043	166480
KAI8118730.1	461552	118708	497578	374865					218027	262607	292185	903466
KAI8118727.1	2.21967e+06	1.98362e+06	1.25907e+06	1.16746e+06		169126			620075	550101	826875
KAI8118724.1	79817.4	483675							75563.3	241223		91632.5
KAI8118710.1		151157		32338.3		81012.6		151208	535622	298730	678882	299442
KAI8118697.1		761620		413924					345984	332761	184919
KAI8118694.1	9.34701e+06	6.64335e+06	7.06844e+06	3.18231e+06	487660	1.04736e+06	417116	1.02516e+06	4.77651e+06	3.61882e+06	3.62637e+06	2.62906e+06
KAI8118679.1	186958			54336.1					60593.4	72290.4	79598.8	88562.3
KAI8118666.1		17819	54871	27445.3
KAI8118652.1				71686.1		158623	211495	113367	310977	105898	203394	219433
KAI8118642.1	71950.8	114015	168059	115873	32442.6	71583.9	38443.2	96995.4	268146	172776	141344	165759
KAI8118620.1	800583	686772	980004	492967	334055	203017	274661	188448	247595	173645	210685	210670
KAI8118597.1	55974.9	25461.4	38178.2	163080	3449.33			12758.9	74789	82413.5	362704	393611
KAI8118574.1			133596	416994		19693.7		25684.4	525229	890876	902522	1.19175e+06
KAI8118573.1	569232	528817	507168	42161.6	43901.1	79556.2	19759.1	145884	599033	947895	468444	621134
KAI8118572.1	8.17923e+06	6.65185e+06	9.00991e+06	2.80942e+06	273113	418639	89137	457839	3.40081e+06	4.30912e+06	1.95319e+06	4.51106e+06
KAI8118567.1	1.67223e+06	1.69774e+06	1.81203e+06	1.07095e+06		30354.8		242036	563778	916342	626121	791816
KAI8118552.1									173538	137551	120488	221476
KAI8118524.1									91056.8	88847.9	190339	170586
KAI8118508.1	235887	95081.6	150624
KAI8118492.1	34970.1	29253.1	33942.6	95540.6					115255	154428	155042	160515
KAI8118487.1	293647	239287	153221	121483					314769	238380	177515	377873
KAI8118439.1	440132	366274	192776	103391		143633			299363	182226	167149	143209
KAI8118399.1	795953	165849	193346	98193.3	51696.1			146926	624562	157392	239081	190316
KAI8118382.1	223165	131339	704069	779230					357084	922385	481993	1.20854e+06
KAI8118339.1	2.13462e+06	1.24198e+06	1.20946e+06	829520	294050	1.05767e+06	1.01915e+06	682463	1.86564e+06	1.349e+06	2.06149e+06	1.53162e+06
KAI8118321.1	3.57989e+06	3.56648e+06	1.87868e+06	1.35817e+06	410454	108811		611868	2.79603e+06	1.20064e+06	1.16768e+06	3.43701e+06
KAI8118319.1	29804.6	13509.7	192560	12979.4
KAI8118259.1												89616.6
KAI8118258.1	1.86794e+06	1.47356e+06	926308	3.52219e+06					2.663e+06	1.77204e+06	3.51057e+06	4.46423e+06
KAI8118252.1	416106	154517	438552	149874		65174.1		104355	224091	376883	321808	446671
KAI8118245.1									110383		165301	134591
KAI8118239.1	2.20312e+07	1.47258e+07	1.51544e+07	9.68856e+06	1.43203e+06	1.46644e+06	953460	2.0877e+06	7.51158e+06	4.55599e+06	3.74204e+06	4.34924e+06
KAI8118188.1	1.98067e+06	2.10564e+06	3.43691e+06	4.49327e+06	155432	224608	96235.6	224035	3.51379e+06	4.78825e+06	3.06296e+06	3.60101e+06
KAI8118176.1	143405				759738	208000	435042	269511	588394	832623	768633	813199
KAI8118166.1		71334.8		439623				213033	455051	908597	466566	979654
KAI8118157.1	533286	700573	820444	1.85586e+06	213616	280924		226677	2.01617e+06	1.60165e+06	1.23681e+06	1.39907e+06
KAI8118144.1	1.0484e+06	3.15404e+06	5.20207e+06	6.0888e+06	1.66979e+06	699516	553356	1.77676e+06	5.65537e+06	7.13885e+06	4.77467e+06	7.20009e+06
KAI8118142.1	247844					40435.2			146377	100264	67317.1
KAI8118137.1	739557	4.86175e+06	469881	3.66739e+06	769239		961450	885505	3.81548e+06	2.06079e+06	1.81958e+06	2.97569e+06
KAI8118110.1	1.24082e+07	1.05482e+07	7.20171e+06	5.31358e+06	1.63189e+06	1.61411e+06	1.30128e+06	2.72831e+06	5.29585e+06	2.76689e+06	5.12378e+06	3.40603e+06
KAI8118108.1		95587.2		165626						721997	172795	257369
KAI8118095.1	2.35277e+06	2.36216e+06	2.79939e+06	1.86406e+06	89068.2	376788	39286.5	260967	2.03223e+06	1.8367e+06	1.91022e+06	1.83458e+06
KAI8118078.1	2.11937e+08	1.16422e+08	1.39395e+08	8.26346e+07	1.68851e+07	3.85724e+07	2.47473e+07	4.03941e+07	9.55814e+07	5.37131e+07	6.06204e+07	6.81254e+07
KAI8118051.1		127207							271525	349152	160805	244786
KAI8118042.1	3.79551e+07	3.55749e+07	1.71572e+07	1.90315e+07	2.36308e+06	3.44539e+06	2.39548e+06	4.42539e+06	2.49901e+07	2.2721e+07	1.80444e+07	1.91074e+07
KAI8118030.1	1.83199e+06	1.33942e+06	1.8222e+06	758823	72213.6	66549.9		42850.1	1.02658e+06	495767	174829	169202
KAI8118020.1										54885
KAI8118009.1	916626	638917	720655	354709		110072	178825	120080	547146	589167	365713	568654
KAI8117979.1	2.93772e+06	2.32483e+06	2.9257e+06	2.9883e+06		447800		855758	2.16978e+06	3.3408e+06	2.49743e+06	4.47232e+06
KAI8117977.1	4.41067e+06	4.17436e+06	8.25438e+06	3.75063e+06		1.1171e+06		315184	539369		1.22316e+06
KAI8117976.1	2.25419e+08	1.71606e+08	2.72389e+08	1.28758e+08	4.34722e+06	1.44098e+07	806463	1.20102e+07	2.37368e+07	1.29636e+07	4.30574e+07	1.55644e+07
KAI8117928.1	1.02534e+06	1.02827e+06	646101	350938		116443	32863.3	194871	468231	348427	451721	482637
KAI8117925.1	711513	701778	829387	610041					586139	298277	170565	290696
KAI8117921.1	6.24017e+06	8.40736e+06	8.30549e+06	1.89979e+07	3.27196e+06	7.02903e+06	5.32703e+06	1.27631e+07	3.52402e+07	5.58339e+07	4.07173e+07	6.39795e+07
KAI8117919.1	2.38151e+06	2.7733e+06	1.55708e+06	1.63984e+06	402058	361949	540291	97025.6	1.69097e+06	932511	1.09237e+06	719042
KAI8117909.1	285236	55477.6	104864	56249.1		32026.2			438996	422343		329047
KAI8117896.1	151460	127427	118976	310426					244893			600275
KAI8117880.1	89056.7	86834.8	78481.1	38702.4		11771.3		20239.8	70662.6	58444.7	91188.9
KAI8117826.1	565963	835719	1.5244e+06	1.52833e+06	33755.2	198680		420513	2.59529e+06	4.15176e+06	2.79171e+06	4.19421e+06
KAI8117823.1			526721	160883					68611.7	93155.3	181079	192024
KAI8117822.1		21138.4	31336.9						23767.3	47172.8	54155.9	43539.7
KAI8117817.1	556009	314613	467472	338157					359646	530617	237986	360827
KAI8117805.1	545009		472441	350027	22973.9						280568	588610
KAI8117778.1	1.80775e+06	924550	1.87419e+06	698512		70538.4			935536	392699	375554	341713
KAI8117767.1			127272						374046	215327	501037	796525
KAI8117761.1	3.67165e+07	3.22079e+07	2.2099e+07	1.87428e+07	2.67567e+06	7.08458e+06	6.55017e+06	5.69943e+06	2.2546e+07	1.34842e+07	1.42505e+07	1.29074e+07
KAI8117760.1	9473.66	5878.76	18562.3		3686.26			10224.4	28128.8	55204.6	44162.7	98624.3
KAI8117736.1	790825	602868	645421	328252	304808	190237		213915	626357	541570	568054	582564
KAI8117704.1	1.15707e+07	8.91479e+06	5.84163e+06	4.56112e+06		1.57671e+06	1.45508e+06	2.2591e+06	4.73353e+06	5.025e+06	5.1828e+06	6.74898e+06
KAI8117690.1		81058.9		77086.9
KAI8117658.1	414970	417353	736864	585587					656916	522331	475069	823356
KAI8117649.1	1.64619e+06	4.09918e+06	4.1868e+06	407251	482848	1.6322e+06	628482	961875		148513	88018.6	98682
KAI8117625.1		433199	300804
KAI8117596.1	1.04233e+06	789904	1.10412e+06	1.11823e+06				396710	98847.9	981997	690617	921697
KAI8117592.1	5.14369e+06	4.8647e+06	6.2902e+06	1.19361e+07	913162	1.18947e+06	612923	2.38087e+06	9.30029e+06	1.76316e+07	1.06527e+07	2.03485e+07
KAI8117572.1										84243.9		115812
KAI8117554.1			708333	316166		145991			311018
KAI8117514.1		276531	238779	253564					295828	445621		313929
KAI8117476.1	936317	558719	725180						291622	250794	392932	231170
KAI8117470.1	1.39991e+06	1.03546e+06	1.29023e+06	456480	51229.4	68567.4		69848.7	13206.9	7702.11	10954.5	6050.85
KAI8117416.1	7.43961e+06	6.09317e+06	6.49332e+06	3.06154e+06	519551	811626	342803	940565	6.08744e+06	4.61656e+06	3.87775e+06	6.05774e+06
KAI8117398.1			116432						156499	160562	164492	217604
KAI8117381.1	1.05628e+06	1.45546e+06	543910	205471	104539			65313	892247	884948	182865	822993
KAI8117377.1	1.79346e+06	2.01257e+06	2.45043e+06	2.11539e+06	141891	158646		245942	1.13134e+06	1.0381e+06	885048	1.51282e+06
KAI8117374.1	286157	288199	120159	146557					272893	296134	341860	460359
KAI8117371.1	4.97692e+06	4.25613e+06	8.39801e+06	8.80233e+06	259636	846577	546198	264461	3.89918e+06	4.96158e+06	6.35873e+06	6.06949e+06
KAI8117339.1	1.38212e+07	1.36762e+07	7.43438e+06	6.20592e+06	1.66944e+06	3.53095e+06	3.58441e+06	3.23812e+06	1.0098e+07	6.4547e+06	6.83629e+06	4.91112e+06
KAI8117318.1	9.99205e+06	5.10739e+06	2.65645e+06	1.93011e+06	216608	233890		1.40188e+06	5.39111e+06	4.50277e+06	4.82541e+06	7.12067e+06
KAI8117316.1	754080	1.72343e+06	2.66032e+06	3.98013e+06		257432	203074	684302	2.41554e+06	4.07248e+06	3.57496e+06	4.05068e+06
KAI8117310.1	1.91418e+07	1.52143e+07	1.15381e+07	6.28466e+06	1.32756e+06	2.27653e+06	1.21349e+06	2.58734e+06	1.09347e+07	8.66926e+06	7.2968e+06	9.98936e+06
KAI8117300.1	1.94029e+07	1.3112e+07	1.13455e+07	4.41684e+06	379689	1.80127e+06	581978	1.57586e+06	7.1934e+06	4.48262e+06	4.3987e+06	6.53135e+06
KAI8117285.1	56711.8	144523	128074	563019					841145	1.50413e+06	714092	1.38125e+06
KAI8117249.1	1.8109e+06	1.53027e+06	1.60858e+06	1.01717e+06		246515	128669	352119	1.34835e+06	1.34579e+06	703279	1.19928e+06
KAI8117218.1	131885		78987.1						55845.6	68215.2	36938.5
KAI8117216.1	391681	426595	266686	129797		12429.7			213248	214419	138173	223578
KAI8117198.1	2.1179e+06	3.86438e+06	4.97302e+06	5.59863e+06	545325	436968	642189	1.13807e+06	8.28702e+06	1.2582e+07	7.92569e+06	1.20697e+07
KAI8117197.1	215868	623585	454514	837330	24104.3	74967.8	43293.4	151314	904921	2.55418e+06	1.37326e+06	2.28228e+06
KAI8117194.1	1.46897e+06	1.41678e+06	1.95374e+06	1.00701e+06					255581	640354	147399
KAI8117173.1		175263	61978.4	63762.2		32393.4	39558.6	60912.4	247395	332640	272411	245487
KAI8117140.1	819847	1.20545e+06	834310	412529				64970.5	574730	618547	177303	538608
KAI8117134.1	1.80154e+06	2.04251e+06	2.35464e+06	1.67636e+06	188813	317451	323230	440624	2.44473e+06	1.12569e+06	4.89639e+06	1.30403e+06
KAI8117115.1	3.45987e+06	3.5883e+06	1.30209e+06	837945					1.49336e+06	1.74503e+06	1.42267e+06	1.3684e+06
KAI8117016.1	473470	472539		193925		41013.9			394705	412922	163345	262368
KAI8117009.1	984027	1.34083e+06	1.30037e+06	1.98729e+06	99543.3	130333	176109	374286	5.76317e+06	1.06068e+07	5.75051e+06	1.14298e+07
KAI8116992.1	3.22664e+07	2.38382e+07	2.85181e+07	1.92124e+07	3.88161e+06	8.46409e+06	4.22129e+06	6.49405e+06	3.23562e+07	1.6041e+07	1.74984e+07	1.58194e+07
KAI8116988.1	3.72361e+07	2.67629e+07	1.6648e+07	1.58101e+07	6.94751e+06	9.3735e+06	5.89742e+06	1.35221e+07	4.42086e+06	2.19861e+06	4.53812e+06	1.78088e+06
KAI8116985.1	6.48129e+06	4.4636e+06	2.63273e+06	2.34892e+06	710177	1.2937e+06	1.22169e+06	2.42127e+06	833641	367878	594702	141583
KAI8116984.1	336361	435422	139610	259230		70299.2		183618			57503.9
KAI8116982.1	1.21631e+07	1.08915e+07	5.01239e+06	6.09809e+06	330928	3.43645e+06	1.74036e+06	5.4041e+06	1.3811e+06	654110	2.10738e+06	437206
KAI8116981.1	805539	859093	735256	646939	34466.9	158024	113190	127730	259840	105327	230898	108977
KAI8116950.1	657707	332095	465317	613982	370265				471279	724939	759729	801804
KAI8116895.1												56568.4
KAI8116851.1	8.65131e+07	7.73197e+07	1.41711e+08	7.35661e+07	6.61457e+06	6.86093e+06	6.87728e+06	1.07374e+07	4.42593e+07	4.5202e+07	4.04216e+07	4.81499e+07
KAI8116812.1										26309.8		30511.9
KAI8116809.1	110950	99994.2	168717	65572.4		51887.7		38170.7	97363.8	85798.2	59167.9	61089.4
KAI8116806.1	1.03851e+06	861957	706059	206360					275410	478533	269159	188696
KAI8116790.1				202493					586364	526922	822108	739037
KAI8116782.1	209493	476169	869599	3.23754e+06	452448	962303	417438	1.53315e+06	8.15297e+06	1.09869e+07	7.36601e+06	1.33644e+07
KAI8116774.1	202677	136652	180985	174948	86225.6		120017	83680.5	276309	306284	152854	232178
KAI8116773.1	210968	75986		27783.7					535324	551385	573995	446522
KAI8116770.1	4.80301e+06	3.14621e+06	2.90821e+06	8.15821e+06	416336	643082	664431	1.58721e+06	1.08868e+07	1.48934e+07	1.29608e+07	1.8236e+07
KAI8116762.1	221428	219711	214428	56286.9					107125	76880.1	48564.4	81250.3
KAI8116761.1	584852	564331	404781	479254					808498	1.06161e+06	240911	406067
KAI8116721.1	282539	140481
KAI8116660.1	467238	321884	323422	222086		71001.1		140370	135157	199023	179840	178498
KAI8116635.1	1.8114e+06	1.72223e+06	1.56931e+06	1.32085e+06					880957	434166	168169	713911
KAI8116617.1	5.37892e+06	1.16724e+06	1.72795e+06	632415		153246	113778	172921	2.41536e+06	895287	998704	1.17531e+06
KAI8116585.1	2.36105e+07	2.4232e+07	1.84872e+07	1.02421e+07	2.97423e+06	4.67562e+06	4.33101e+06	6.55413e+06	2.17985e+07	1.80403e+07	1.66484e+07	2.16374e+07
KAI8116572.1	9.40065e+06	6.6107e+06	8.29517e+06	1.86466e+07	553802	639093	730832	1.54424e+06	1.34532e+07	1.5646e+07	1.4151e+07	1.97759e+07
KAI8116548.1	111408			135890				77812.7	132629	211777	146751	323399
KAI8116543.1							36201.3		259367	106525	164241	116107
KAI8116532.1	1.1644e+07	7.49885e+06	8.9339e+06	3.60011e+06	73895.8	537955	67758.9	172905	5.27038e+06	4.49113e+06	1.84783e+06	4.16369e+06
KAI8116528.1		247409	275878	612529		320909		738331	1.09521e+06	1.56885e+06	1.22292e+06	2.34357e+06
KAI8116523.1	670229	385908	661152	1.12123e+06		93966			741454	940451	1.18504e+06	1.12368e+06
KAI8116508.1	589066	221549	457046	90685.8	29117	41819.9		41082	125339	113288	74233.9	17675.9
KAI8116492.1	329303	437529	968134	497949	61124.7	240189	113735	220241	1.68152e+06	2.70155e+06	1.95219e+06	2.07038e+06
KAI8116483.1	3.12765e+06	3.30193e+06	2.76304e+06	4.06871e+06		238889	338454	508893	2.81588e+06	3.50676e+06	3.41043e+06	4.39311e+06
KAI8116463.1	1.38788e+06	1.19428e+06	1.08493e+06	1.28958e+06	462076	146425	96889.4		1.49213e+06	1.94871e+06	2.46701e+06	3.16264e+06
KAI8116462.1	371555	379099	566594	121135		29126.2		36894.2	158563	144272	115197	55649.7
KAI8116460.1		265035	84475.5	92141.6	3.70448e+06	4.36658e+06	3.0604e+06	3.02589e+06	2.00283e+06	3.1152e+06	4.35516e+06	1.20099e+06
KAI8116438.1											84232.5	83967.3
KAI8116435.1	294756	450324	149738	558429					393173	1.01309e+06	883950	590960
KAI8116422.1	4.08424e+07	2.96071e+07	4.28739e+07	1.61281e+07	3.14883e+06	2.97996e+06	2.1515e+06	3.54958e+06	1.97149e+07	1.45489e+07	1.29259e+07	1.4388e+07
KAI8116420.1	23426.5	17247.6		19505.7						85972.8	41864.6	111401
KAI8116393.1	7.13171e+06	4.10706e+06	4.82073e+06	1.79111e+06	104881	524078	647279	699853	2.94626e+06	1.45779e+06	1.57946e+06	1.53606e+06
KAI8116377.1	155441	138211	119967	188954					585926	748836	614417	905783
KAI8116356.1				61791.9				155235		198243	146215	130605
KAI8116275.1	188380	228520	320279	239131		224034	463253	61363.2	586285	517139	442251	459805
KAI8116266.1				804729							64945.3
KAI8116256.1								229455	747772	608941	824103	208027
KAI8116119.1		135544							173804	778896	370496	159966
KAI8116109.1	301164	162132	441535	262234					312667	424470	323581	384147
KAI8116105.1	207734	87212.3	201315	112312		19433.7	15453.8		404290	429753	250398	309294
KAI8116104.1	1.41853e+08	9.15626e+07	8.7115e+07	4.83643e+07	2.36479e+07	3.47533e+07	2.41267e+07	4.36572e+07	9.3421e+07	7.88125e+07	6.28607e+07	8.8084e+07
KAI8116096.1	149858	59672.9	65204.1
KAI8116029.1	7.68207e+06	8.79829e+06	5.43736e+06	5.37371e+06	1.49896e+06	2.01748e+06	1.28683e+06	1.89699e+06	7.38749e+06	8.65046e+06	6.49843e+06	8.17817e+06
KAI8116009.1	3.66805e+06	1.56895e+06	3.03055e+06	1.77438e+06					227382	208291	192209	170311
KAI8116000.1	527453	496667	331661	259530	51016.8	80538.5	76810.9	75723.2	367719	328562	112634	141217
KAI8115981.1	21974	27917.4	38287.3	38642.2		4438.88			62992	115301	117817	202724
KAI8115948.1	454734	219017	207510	136961								92137.7
KAI8115908.1					2.40192e+06	1.59775e+06	2.61306e+06	935799
KAI8115873.1	3.16612e+06	2.42703e+06	901531	1.40577e+06		310837	234702	488074	403671	47641.4	939649	34936.6
KAI8115872.1		342096	260054	819214		77243.9		355808	2.05532e+06	3.63241e+06	2.16073e+06	3.14934e+06
KAI8115845.1	1.78602e+07	8.39727e+06	2.7674e+07	1.25489e+07		123135		274570	2.29712e+06	2.97065e+06	4.87967e+06	3.91795e+06
KAI8115762.1	179396	126278	137597	70332.5	16790.9	46513	25490.1	66986	203805	207973	82212.6	97436.4
KAI8115733.1		53323.7		101137	2.89177e+06	5.38748e+06	4.25112e+06	3.09515e+06	3.11267e+06	2.94548e+06	2.47463e+06	1.06275e+06
KAI8115724.1									39564	23394.8	67993.5	56755.3
KAI8115699.1					191987	2.58898e+06	1.38934e+06	2.11927e+06	2.58264e+06	3.77339e+06	2.90379e+06	2.20671e+06
KAI8115698.1					1.10381e+06	2.60489e+06	1.72936e+06	2.55777e+06	2.29983e+06	1.03509e+06	4.05321e+06	1.67405e+06
KAI8115665.1	205000	892913	493592	83170.8					156441	257365	211954	275134
KAI8115633.1	726255	765696	1.47963e+06	1.75798e+06		155226	44816.7	305185	1.53234e+06	2.341e+06	1.679e+06	2.70253e+06
KAI8115628.1	88437	56849.4	92833.9	56579.2					78279.8	88136.2	39209.5	30641
KAI8115627.1					116434	224390	171169		317265	342991	332099	168008
KAI8115624.1	349427	665609	391707	1.75584e+06				140750	2.71348e+06	4.2134e+06	2.35344e+06	4.30656e+06
KAI8115616.1	492341	414292	414491	220793	54469.2	532234		68405.7	711699	994126	881941	1.24871e+06
KAI8115589.1	3.83775e+06	3.1272e+06	1.92099e+06	1.19422e+06		139873	111585	194822	1.08777e+06	1.2409e+06	750598	1.05854e+06
KAI8115581.1		27569.6	147551	73313.6		16105.1	12779.5	31466.3	116262	122643	101905	116584
KAI8115580.1	274178	311229	258105	507733		76127.9	102727	121263	2.29548e+06	1.61041e+06	2.44844e+06	2.44883e+06
KAI8115576.1	266509	152689	121057						16397.3		13331.3
KAI8115569.1	163667		126775	201977					216061	363964	342302	536887
KAI8115553.1	222577	226886	197001	154656				39811.5	453051	710161	425613	730942
KAI8115544.1	1.09232e+06	568893	590020	921692		32012.3		76211.6	1.17798e+06	1.70582e+06	1.02159e+06	2.02017e+06
KAI8115542.1	1.09132e+07	9.62026e+06	1.16097e+07	6.34035e+06	704667	572103	30163.8	910073	5.82456e+06	2.2932e+06	3.94524e+06	5.66068e+06
KAI8115536.1	1.24002e+06	382795	446733		108484	264424	168596	226832	2.19177e+06	598830	1.35563e+06	887042
KAI8115492.1	1.87426e+06	1.385e+06	2.1227e+06	1.23592e+06	4.51859e+06	2.16157e+06	3.66767e+06	2.23428e+06	4.6664e+06	7.10874e+06	9.14864e+06	7.9002e+06
KAI8115455.1	470591	1.14001e+06	598060	390763	390373	7.46477e+06	9.48192e+06	6.30806e+06	1.76248e+06	2.31159e+06	2.12617e+06	4.52949e+06
KAI8115448.1	326867	2.77873e+06	1.46048e+06	822367	2.46576e+07	3.31743e+07	4.19486e+07	1.37724e+07	1.27039e+07	1.30554e+07	1.41859e+07	5.56605e+06
KAI8115447.1	926218	2.32638e+06	644757		500172	6.46949e+06	4.68971e+06	3.73114e+06	2.89283e+06	3.10646e+06	2.29734e+06	1.70182e+06
KAI8115434.1									59092	110617	53586.4	86516.4
KAI8115433.1	372269		75533.4
KAI8115426.1	534432	422585	345600	87984	59499				993323	222511	304085	199876
KAI8115422.1	2.68799e+07	1.67989e+07	1.18588e+07	7.58214e+06	2.39694e+06	3.34135e+06	2.18543e+06	3.42165e+06	1.47387e+07	1.14866e+07	1.09917e+07	1.32067e+07
KAI8115373.1	587343	620084	535615	732304					252335	1.07145e+06	491492	1.34391e+06
KAI8115361.1	935242	310098	460619	395110					273013	675884	255807	412092
KAI8115357.1	3.68626e+06	1.80497e+06	577918	686737		229479	220628	228192	1.51192e+06		1.23646e+06	1.34008e+06
KAI8115354.1	165913		75208.8						90327.5
KAI8115332.1							5.65345e+06
KAI8115296.1	301917	151477	116192	833096		48140.4		115341	1.53243e+06	3.36869e+06	1.67766e+06	3.47515e+06
KAI8115294.1	1.14601e+07	1.11251e+07	1.06217e+07	5.83379e+06	2.83069e+06	2.53497e+06	1.62685e+06	2.68078e+06	1.34251e+07	9.31987e+06	7.67247e+06	8.56217e+06
KAI8115292.1	911566	522235	426166	118875		38444.2			695220	493264	215014	414169
KAI8115282.1	2.71249e+06	2.39907e+06	1.70779e+06	762360		219913	386608		754445	537053	469590	248792
KAI8115277.1	665442	477363	865913	823021	94971.3		75669.9	85621.7	971173	1.57435e+06	1.2419e+06	2.12735e+06
KAI8115258.1	332557	126930	174423	143358				57537	439766	458391	187932	410219
KAI8115254.1	2.1902e+06	1.13471e+06	2.07674e+06	1.64223e+06	48252.5	152344	234222	176811	1.46357e+06	2.11356e+06	1.77314e+06	2.00077e+06
KAI8115253.1	449940	284048	383697	245425						274881	201351	299188
KAI8115230.1	3.89673e+07	2.16302e+07	2.65528e+07	1.78985e+07	4.50771e+06	1.1903e+07	9.74871e+06	1.20467e+07	3.43767e+07	2.38063e+07	2.71594e+07	3.24208e+07
KAI8115229.1		103724
KAI8115217.1			245403	162148							132271	205959
KAI8115211.1	7.28542e+07	4.96798e+07	5.84155e+07	2.64142e+07	3.5372e+06	4.22914e+06	2.36517e+06	5.05846e+06	2.42187e+07	2.09398e+07	1.49781e+07	1.99517e+07
KAI8115181.1	1.4427e+06	833466	1.36774e+06	1.24732e+06					872412	2.59396e+06	1.40794e+06	5.1762e+06
KAI8115177.1						146615			709915	524113	717727	1.32431e+06
KAI8115163.1	1.00597e+06	1.17396e+06	1.28259e+06	4.43022e+06	71973.8	224955	192741	265029	2.96156e+06	4.8933e+06	3.72202e+06	4.59296e+06
KAI8115152.1				562351	87758.7				537968	906215	559209	751919
KAI8115140.1	740257	1.18044e+06	1.13146e+06	847611	63199.8	301697	57350	210301	1.09996e+06	923607	639747	966321
KAI8115133.1			149101	714437	75471.4		39942.8	495081	356083	784927	326541	1.36909e+06
KAI8115130.1	4.28393e+06	3.50842e+06	5.74056e+06	4.876e+06	158084	52421.6		535320	3.74159e+06	4.39087e+06	3.75107e+06	4.74317e+06
KAI8115125.1						63487.5		85917.8
KAI8115124.1	493941	167796	256280	188098					404364	479871	356319	561146
KAI8115119.1	1.57058e+07	2.46235e+07	3.10064e+07	3.43077e+07	1.32371e+06	2.98506e+06	1.4533e+06	5.59881e+06	1.93791e+07	3.24608e+07	2.63411e+07	3.64874e+07
KAI8115117.1				7749.52
KAI8115113.1	3.30452e+06	2.60444e+06	1.33743e+06	1.34687e+06	135194	180289	156964	101950	1.18849e+06	940829	694672	509189
KAI8115103.1	5.4741e+06	5.0542e+06	5.12179e+06	6.65705e+06	316594	338680	367389	526531	1.03188e+07	1.11781e+07	1.00214e+07	1.25223e+07
KAI8115100.1	171681	143616	151947	179240					169126	291925	261075	393315
KAI8115083.1	965643	2.38435e+06	2.78417e+06	4.7731e+06				208105	2.4167e+06	3.54954e+06	2.64547e+06	3.52044e+06
KAI8115076.1		117105	60052	107973	476236	1.01919e+06	2.22508e+06	2.20859e+06	776025	497688	581809	640042
KAI8115075.1	171661	171044	582296	119832		13212.8	7905.17	66483	552155	315349	331401	589597
KAI8115068.1	71642.9	49750.1		57719.6					140818	111519	64908.8	97689.2
KAI8114991.1	1.07799e+06	1.54565e+06	1.05146e+06	2.39408e+06	145361	201561		225064	1.70433e+06	2.6672e+06	1.34145e+06	2.31794e+06
KAI8114980.1	1.51182e+06	1.33253e+06	1.47632e+06	909818	45386.1	104119	64709.4	214964	543462	1.68981e+06	999800	2.02148e+06
KAI8114962.1			234132							192609
KAI8114937.1	260680	169481		106849		54717.8			129133			66139.9
KAI8114930.1	3.03292e+06	1.59477e+06	1.05693e+06			166510			180480	160531	623253	688676
KAI8114905.1	464983	519237	37911.4	125864	52564.5	128749	79799.2	185772	297511	401226	197609	254699
KAI8114857.1				130287						116178	95022.6	117978
KAI8114848.1	253233	116894	244461	128613					132748	277102	102603	172759
KAI8114830.1	2.75296e+06	1.90428e+06	2.55541e+06	2.31311e+06	113822	103362	211308	78218	915446	535559	597653	603514
KAI8114792.1										39358.2
KAI8114790.1	174607	131979		50018.5						99037.1
KAI8114767.1	906362	1.01876e+06	901292	604593					848217	635798	641285	311474
KAI8114765.1		844148	833289	356231					846178	1.50121e+06	1.2237e+06	2.31134e+06
KAI8114725.1	3.227e+06	2.53447e+06	2.69898e+06	1.91579e+06	522684	326069	108539	593583	2.98402e+06	1.00637e+06	2.13733e+06	1.20704e+06

## Sheet: S2 - MSstats
(1)Seravs(-1)Milk					(1)On-Sheepvs(-1)Sera					(1)On-Sheepvs(-1)Milk
Order	Order	log2FC	adj.pvalue		Order	Protein	log2FC	adj.pvalue		Order	Protein	log2FC	adj.pvalue
KAI8131031.1	1133	-4.73188	0		KAI8131031.1	1100	NA	NA		KAI8131031.1	1092	NA	NA
KAI8130972.1	1129	0.878458	1.27001e-09		KAI8130972.1	1096	-1.07682	6.30894e-08		KAI8130972.1	1088	-0.422112	0.0162382
KAI8130962.1	1127	3.05214	0		KAI8130962.1	1094	-1.3796	1.34572e-06		KAI8130962.1	1086	0.554955	0.178559
KAI8130919.1	1124	0.186826	0.311801		KAI8130919.1	1091	NA	NA		KAI8130919.1	1083	NA	NA
KAI8130875.1	1121	NA	NA		KAI8130875.1	1088	NA	NA		#N/A	#N/A	#N/A	#N/A
KAI8130821.1	1116	0.445216	0		KAI8130821.1	1083	-0.551168	0		KAI8130821.1	1076	-0.110926	0.00472004
KAI8130748.1	1110	0.224881	0.034219		KAI8130748.1	1077	-1.58681	1.14324e-13		KAI8130748.1	1070	-1.62124	4.1667e-14
KAI8130615.1	1099	NA	NA		KAI8130615.1	1066	-0.0904316	0.354921		KAI8130615.1	1059	NA	NA
KAI8130541.1	1088	-1.30493	2.81661e-14		KAI8130541.1	1055	NA	NA		KAI8130541.1	1048	NA	NA
#N/A	#N/A	#N/A	#N/A		KAI8130461.1	1049	NA	NA		KAI8130461.1	1042	NA	NA
KAI8130383.1	1075	1.18939	2.66582e-06		KAI8130383.1	1041	NA	NA		KAI8130383.1	1035	NA	NA
KAI8130285.1	1071	-0.565949	0		KAI8130285.1	1037	-2.67613	0		KAI8130285.1	1031	-3.29615	0
KAI8130154.1	1059	0.712767	3.04523e-11		KAI8130154.1	1025	-1.12264	5.31037e-11		KAI8130154.1	1019	-0.393157	0.00265719
KAI8130106.1	1058	0.036554	0.488289		KAI8130106.1	1024	-0.225047	4.94892e-05		KAI8130106.1	1018	-0.198065	0.00371052
KAI8130064.1	1051	-0.447057	4.9505e-10		KAI8130064.1	1017	-2.1996	9.91895e-06		KAI8130064.1	1011	-2.75459	7.87253e-08
KAI8130022.1	1050	4.469	0		KAI8130022.1	1016	0.200286	0.00304493		KAI8130022.1	1010	4.29165	0
KAI8129989.1	1046	1.47174	0		KAI8129989.1	1012	-2.82536	0		KAI8129989.1	1006	-1.20051	1.01783e-13
KAI8129966.1	1045	0.768801	0		KAI8129966.1	1011	-1.61838	0		KAI8129966.1	1005	-0.85441	4.92864e-12
KAI8129886.1	1038	-0.334844	3.43078e-09		KAI8129886.1	1004	-2.11528	0		KAI8129886.1	999	-2.76898	0
KAI8129805.1	1033	NA	NA		KAI8129805.1	999	-0.683885	1.70265e-12		KAI8129805.1	994	NA	NA
#N/A	#N/A	#N/A	#N/A		KAI8129608.1	986	NA	NA		KAI8129608.1	983	NA	NA
KAI8129555.1	1018	-0.825987	0		KAI8129555.1	983	0.146236	0.0349427		KAI8129555.1	980	-0.6633	0
KAI8129298.1	1000	-0.153603	0.0235448		KAI8129298.1	966	0.628543	1.69677e-10		KAI8129298.1	962	0.511147	2.89239e-11
KAI8129257.1	994	NA	NA		#N/A	#N/A	#N/A	#N/A		KAI8129257.1	956	NA	NA
KAI8129255.1	993	-0.123843	0.230045		KAI8129255.1	960	NA	NA		KAI8129255.1	955	NA	NA
KAI8128971.1	977	1.71489	1.33215e-13		KAI8128971.1	944	NA	NA		KAI8128971.1	940	NA	NA
KAI8128943.1	974	1.38249	0		KAI8128943.1	940	1.76405	0		KAI8128943.1	936	2.94467	0
KAI8128941.1	973	0.680539	0		KAI8128941.1	939	-1.22366	0		KAI8128941.1	935	-0.440149	2.76175e-05
KAI8128823.1	965	0.0436045	0.106819		KAI8128823.1	931	0.860878	0		KAI8128823.1	928	0.853817	0
KAI8128785.1	959	0.0106847	0.790915		KAI8128785.1	925	-0.557856	0		KAI8128785.1	922	-0.429932	2.53701e-10
KAI8128741.1	958	1.61161	1.08422e-11		KAI8128741.1	924	-1.37958	5.09526e-14		KAI8128741.1	921	0.0806463	0.167875
KAI8128649.1	951	1.83607	0		KAI8128649.1	919	NA	NA		KAI8128649.1	914	NA	NA
KAI8128569.1	948	0.416239	4.46705e-05		KAI8128569.1	916	NA	NA		KAI8128569.1	911	NA	NA
KAI8128354.1	936	1.70469	5.61881e-16		KAI8128354.1	905	-2.63625	1.71611e-12		KAI8128354.1	899	-0.964463	3.65636e-05
KAI8128318.1	932	-0.760688	1.15596e-12		KAI8128318.1	901	-0.188776	0.11039		KAI8128318.1	895	-0.83402	0.000104964
KAI8128278.1	929	4.17714	0		KAI8128278.1	898	NA	NA		KAI8128278.1	892	NA	NA
KAI8128276.1	928	2.84555	0		KAI8128276.1	897	-2.92498	0		KAI8128276.1	891	-0.581176	0.0131425
KAI8128275.1	927	3.82446	0		KAI8128275.1	896	-4.12932	0		KAI8128275.1	890	1.17593	1.71493e-10
KAI8128266.1	926	-0.81755	0		KAI8128266.1	895	-1.57403	0		KAI8128266.1	889	-2.79567	0
KAI8128265.1	925	2.2527	0		KAI8128265.1	894	-2.4509	0		KAI8128265.1	888	-0.125473	0.414644
KAI8128199.1	922	0.211089	0.165813		KAI8128199.1	891	NA	NA		KAI8128199.1	885	NA	NA
KAI8128172.1	921	0.287102	5.76548e-08		KAI8128172.1	890	-0.212461	0.000327428		KAI8128172.1	884	0.12837	3.29705e-05
KAI8128093.1	918	NA	NA		KAI8128093.1	887	NA	NA		#N/A	#N/A	#N/A	#N/A
KAI8128055.1	912	1.85019	0		KAI8128055.1	881	NA	NA		KAI8128055.1	877	NA	NA
KAI8127903.1	900	NA	NA		KAI8127903.1	868	NA	NA		#N/A	#N/A	#N/A	#N/A
KAI8127873.1	898	3.83541	0		KAI8127873.1	866	NA	NA		KAI8127873.1	864	NA	NA
KAI8127829.1	892	-0.643456	2.26049e-13		KAI8127829.1	860	0.0963012	0.292157		KAI8127829.1	858	0.075086	0.396304
KAI8127783.1	888	-0.225797	0.00387922		KAI8127783.1	856	1.48037	1.91728e-09		KAI8127783.1	854	2.16916	0
KAI8127601.1	872	0.174303	0.0473195		KAI8127601.1	842	-2.39671	0		KAI8127601.1	838	-1.95777	0
KAI8127585.1	871	-0.357395	3.63062e-14		KAI8127585.1	841	-0.814344	2.76934e-15		KAI8127585.1	837	-1.2184	0
KAI8127407.1	863	0.108234	0.262174		KAI8127407.1	833	-1.18624	2.55143e-07		KAI8127407.1	829	-1.71689	4.77268e-16
KAI8127406.1	862	-0.186119	0.0809389		KAI8127406.1	832	-2.19136	2.49089e-13		KAI8127406.1	828	-2.49228	1.01539e-11
KAI8127402.1	861	0.475514	1.42465e-08		KAI8127402.1	831	-1.2565	1.59738e-15		KAI8127402.1	827	-0.762682	0.000532366
KAI8127260.1	848	-1.01832	0		KAI8127260.1	818	-1.10833	1.09351e-13		KAI8127260.1	814	-1.8817	0
KAI8127172.1	841	0.636153	1.18456e-08		KAI8127172.1	811	-2.00691	0		KAI8127172.1	807	-1.55042	4.37822e-13
KAI8127097.1	836	1.03467	7.23069e-07		KAI8127097.1	806	-0.13951	0.506372		KAI8127097.1	802	0.579759	2.06128e-07
KAI8127083.1	834	-0.526438	5.97093e-11		KAI8127083.1	804	-2.45493	0		KAI8127083.1	800	-3.03091	0
KAI8127082.1	833	-1.35413	0		KAI8127082.1	803	-1.71959	0		KAI8127082.1	799	-2.9491	0
KAI8126880.1	819	5.97476	0		KAI8126880.1	789	-0.858268	3.66404e-13		KAI8126880.1	786	4.32347	0
KAI8126872.1	817	3.41559	0		KAI8126872.1	787	-1.26022	0		KAI8126872.1	784	2.26772	0
KAI8126803.1	814	1.85455	0		KAI8126803.1	784	NA	NA		KAI8126803.1	781	NA	NA
KAI8126611.1	805	0.671598	9.61256e-10		KAI8126611.1	775	0.475355	9.21061e-06		KAI8126611.1	772	0.997661	0
KAI8126608.1	804	0.755914	1.11022e-15		KAI8126608.1	774	-0.828732	6.82179e-13		KAI8126608.1	771	0.844494	5.37888e-08
KAI8126589.1	802	1.92913	0		KAI8126589.1	772	-2.20482	3.19792e-14		KAI8126589.1	769	-0.0449944	0.771179
KAI8126583.1	801	-0.676777	4.15641e-08		KAI8126583.1	771	-1.09256	6.19056e-07		KAI8126583.1	768	-1.27405	7.84543e-08
KAI8126471.1	794	2.53382	0		KAI8126471.1	766	1.17344	0		KAI8126471.1	761	3.51041	0
KAI8126464.1	792	1.33758	0		KAI8126464.1	764	-4.36399	0		KAI8126464.1	760	-2.63475	0
KAI8126459.1	791	3.49534	1.65206e-15		KAI8126459.1	763	1.26506	3.68662e-13		KAI8126459.1	759	4.23944	4.77268e-16
KAI8126051.1	770	NA	NA		KAI8126051.1	742	NA	NA		#N/A	#N/A	#N/A	#N/A
KAI8126050.1	769	4.33149	0		KAI8126050.1	741	-3.52033	0		KAI8126050.1	738	1.45046	0
KAI8126048.1	768	NA	NA		KAI8126048.1	740	-3.05232	0		KAI8126048.1	737	NA	NA
KAI8125996.1	764	-0.65707	5.61881e-16		KAI8125996.1	737	-1.65835	0		KAI8125996.1	733	-2.34688	0
KAI8125967.1	762	-1.67374	4.22473e-08		KAI8125967.1	736	NA	NA		KAI8125967.1	731	NA	NA
KAI8125912.1	758	0.491778	4.7874e-06		KAI8125912.1	732	1.01106	0		KAI8125912.1	727	1.58994	0
KAI8125835.1	754	0.270959	1.07467e-10		KAI8125835.1	728	0.287365	3.00482e-06		KAI8125835.1	723	0.556857	1.02618e-12
KAI8125790.1	749	-2.35448	8.9269e-06		KAI8125790.1	723	0.140052	0.672913		KAI8125790.1	718	-2.41077	4.23278e-07
KAI8125777.1	748	0.151859	0.110758		KAI8125777.1	722	NA	NA		KAI8125777.1	717	NA	NA
KAI8125692.1	736	0.206551	0.0123287		KAI8125692.1	710	-3.0555	0		KAI8125692.1	706	-2.80081	0
KAI8125689.1	735	0.140019	3.66605e-06		KAI8125689.1	709	-0.245189	3.37429e-07		KAI8125689.1	705	-0.232054	4.94808e-07
KAI8125645.1	732	0.0280539	0.606499		KAI8125645.1	706	-0.149346	0.667126		KAI8125645.1	702	-3.38613	0
KAI8125644.1	731	1.4911	0		KAI8125644.1	705	NA	NA		KAI8125644.1	701	NA	NA
KAI8125610.1	729	1.98148	0		KAI8125610.1	703	-1.94016	0		KAI8125610.1	699	0.0994922	0.00181614
KAI8125571.1	726	NA	NA		KAI8125571.1	700	NA	NA		#N/A	#N/A	#N/A	#N/A
KAI8125509.1	719	-0.38872	3.68117e-05		KAI8125509.1	693	NA	NA		KAI8125509.1	690	NA	NA
KAI8125435.1	711	0.993357	0		KAI8125435.1	685	-2.73484	0		KAI8125435.1	682	-1.60065	0
KAI8125208.1	694	-0.361087	2.57593e-10		KAI8125208.1	668	-1.57592	0		KAI8125208.1	666	-1.64155	0
KAI8125172.1	691	0.923363	1.24426e-13		KAI8125172.1	665	-1.69112	0		KAI8125172.1	663	-0.703085	5.92678e-05
KAI8124981.1	680	-0.486451	3.7134e-07		KAI8124981.1	655	1.42028	0		KAI8124981.1	652	0.983763	0
KAI8124968.1	679	NA	NA		KAI8124968.1	654	NA	NA		KAI8124968.1	651	NA	NA
KAI8124917.1	677	0.295121	0.000170699		KAI8124917.1	652	-1.2287	2.98621e-11		KAI8124917.1	649	-0.896965	2.17604e-14
KAI8124816.1	671	1.17548	0		KAI8124816.1	647	-1.86309	0		KAI8124816.1	644	-0.201996	0.211716
KAI8124775.1	669	0.548058	1.79031e-14		KAI8124775.1	645	-1.84025	0		KAI8124775.1	642	-1.05191	0
KAI8124610.1	659	1.82916	0		KAI8124610.1	637	NA	NA		KAI8124610.1	633	NA	NA
KAI8124576.1	657	0.244121	0.121467		KAI8124576.1	635	2.23004	0		KAI8124576.1	631	2.80538	0
KAI8124540.1	656	-0.0383601	0.786904		KAI8124540.1	634	-0.0857238	0.714939		KAI8124540.1	630	-0.0857711	0.340723
KAI8124528.1	655	2.25954	0		KAI8124528.1	633	-3.5106	0		KAI8124528.1	629	-1.27843	0
KAI8124438.1	650	0.204947	2.01063e-08		KAI8124438.1	628	-2.58505	0		KAI8124438.1	624	-2.35608	0
KAI8124300.1	640	NA	NA		KAI8124300.1	619	-0.268614	0.0395313		KAI8124300.1	614	NA	NA
KAI8124248.1	637	NA	NA		KAI8124248.1	616	-0.384905	0.00082435		KAI8124248.1	611	NA	NA
KAI8124174.1	634	0.632292	1.19535e-07		KAI8124174.1	613	1.04151	0		KAI8124174.1	608	1.32099	1.65744e-08
KAI8124073.1	629	0.0641584	0.489357		KAI8124073.1	610	-1.28856	0		KAI8124073.1	603	-0.328824	0.0313448
KAI8124003.1	623	0.145904	0.179808		KAI8124003.1	604	1.19202	1.58053e-09		KAI8124003.1	597	1.49404	3.76547e-14
KAI8123966.1	620	2.92119	0		KAI8123966.1	601	-2.72218	0		KAI8123966.1	594	0.188026	0.0139083
KAI8123940.1	618	-0.0512526	0.567759		KAI8123940.1	599	-0.149575	0.290139		KAI8123940.1	592	0.307	0.0656475
KAI8123863.1	613	1.12613	3.2505e-11		KAI8123863.1	594	-1.21054	4.80216e-06		KAI8123863.1	587	-0.25021	0.130139
KAI8123862.1	612	0.416638	0.00396383		KAI8123862.1	593	NA	NA		KAI8123862.1	586	NA	NA
KAI8123737.1	602	1.80096	0		KAI8123737.1	584	-0.530342	7.01645e-15		KAI8123737.1	576	1.3362	0
KAI8123670.1	597	1.51703	0		KAI8123670.1	579	-3.95127	0		KAI8123670.1	572	-2.32861	2.87123e-14
KAI8123656.1	596	0.0636999	0.376102		KAI8123656.1	578	-0.313726	0.00128155		KAI8123656.1	571	-0.877073	0
KAI8123640.1	593	2.17783	0		KAI8123640.1	575	1.81064	0		KAI8123640.1	569	3.92976	0
KAI8123585.1	588	-1.1685	0		KAI8123585.1	571	-1.35442	4.25891e-09		KAI8123585.1	564	-2.602	0
KAI8123553.1	585	3.57739	0		KAI8123553.1	568	1.31203	0		KAI8123553.1	561	3.96407	0
KAI8123518.1	583	NA	NA		KAI8123518.1	566	1.14639	0		KAI8123518.1	559	NA	NA
KAI8123463.1	580	-2.06822	2.10531e-13		KAI8123463.1	563	-0.248136	0.00918837		KAI8123463.1	556	-2.27096	1.46277e-13
KAI8123438.1	579	4.16169	0		KAI8123438.1	562	0.858416	0		KAI8123438.1	555	5.0839	0
KAI8123421.1	577	4.15208	0		KAI8123421.1	560	-3.88886	0		KAI8123421.1	553	0.448849	9.30466e-06
KAI8123414.1	575	3.57271	0		KAI8123414.1	558	-3.42838	0		KAI8123414.1	551	0.112661	0.456415
KAI8123404.1	574	-1.11808	0		KAI8123404.1	557	-0.0610472	0.512546		KAI8123404.1	550	-1.68415	0
KAI8123397.1	573	NA	NA		KAI8123397.1	556	-2.18392	0		KAI8123397.1	549	NA	NA
KAI8123389.1	572	NA	NA		KAI8123389.1	555	-0.938004	0		KAI8123389.1	548	NA	NA
KAI8123369.1	571	-1.93475	1.25592e-11		KAI8123369.1	554	NA	NA		KAI8123369.1	547	NA	NA
KAI8123283.1	564	-0.594182	0		KAI8123283.1	547	-0.968622	1.66503e-10		KAI8123283.1	540	-2.25689	0
KAI8123209.1	552	-0.832878	1.17301e-06		KAI8123209.1	535	1.47612	7.67248e-08		KAI8123209.1	528	0.574753	0.0329861
KAI8122873.1	533	0.449592	0		KAI8122873.1	517	NA	NA		KAI8122873.1	510	NA	NA
KAI8122851.1	531	-1.2772	0		KAI8122851.1	515	-1.50057	0		KAI8122851.1	508	-2.68719	0
KAI8122808.1	528	-0.136301	0.00172526		KAI8122808.1	512	-1.43439	0		KAI8122808.1	505	-1.54647	0
KAI8122652.1	519	1.40645	0		KAI8122652.1	504	0.135989	0.101315		KAI8122652.1	497	2.46124	0
KAI8122533.1	514	4.31095	0		KAI8122533.1	499	1.62457	0		KAI8122533.1	492	5.15049	0
KAI8122223.1	496	NA	NA		#N/A	#N/A	#N/A	#N/A		KAI8122223.1	474	NA	NA
KAI8121670.1	465	-0.613903	3.82472e-09		KAI8121670.1	454	-1.43242	0		KAI8121670.1	445	-2.43268	0
KAI8121669.1	464	0.803794	2.83922e-08		KAI8121669.1	453	NA	NA		KAI8121669.1	444	NA	NA
KAI8121551.1	461	1.04887	0		KAI8121551.1	450	-1.55936	0		KAI8121551.1	441	-0.824469	1.72287e-11
KAI8121549.1	460	-0.25851	8.70939e-12		KAI8121549.1	449	1.44273	0		KAI8121549.1	440	1.07455	0
KAI8121545.1	459	-0.0854705	0.375425		KAI8121545.1	448	NA	NA		KAI8121545.1	439	NA	NA
KAI8121543.1	458	1.33771	9.54266e-11		KAI8121543.1	447	-0.845046	5.98909e-07		KAI8121543.1	438	2.64243	1.0187e-10
KAI8121508.1	455	NA	NA		KAI8121508.1	444	-1.49932	5.66948e-09		KAI8121508.1	435	NA	NA
KAI8121488.1	454	0.329021	0.497306		KAI8121488.1	443	0.316586	0.00846103		KAI8121488.1	434	0.284224	0.0133676
KAI8121474.1	453	0.258229	0.466831		KAI8121474.1	442	NA	NA		KAI8121474.1	433	NA	NA
KAI8121307.1	440	-1.5817	0		KAI8121307.1	429	NA	NA		KAI8121307.1	421	NA	NA
KAI8121144.1	429	1.71984	4.29688e-09		KAI8121144.1	418	NA	NA		KAI8121144.1	410	NA	NA
KAI8121096.1	428	0.633269	0		KAI8121096.1	417	NA	NA		KAI8121096.1	409	NA	NA
KAI8121092.1	426	1.87562	0		KAI8121092.1	415	-1.50145	0		KAI8121092.1	407	0.245861	0.00434927
KAI8120868.1	413	-2.19122	0		KAI8120868.1	402	1.07697	0		KAI8120868.1	395	-0.921596	2.39381e-14
KAI8120862.1	412	-1.86778	0		KAI8120862.1	401	1.10106	0		KAI8120862.1	394	-0.534547	3.28348e-13
KAI8120858.1	411	NA	NA		KAI8120858.1	400	NA	NA		KAI8120858.1	393	-2.13953	1.75334e-12
KAI8120776.1	408	NA	NA		KAI8120776.1	397	NA	NA		#N/A	#N/A	#N/A	#N/A
KAI8120740.1	406	1.68781	2.94535e-12		KAI8120740.1	395	NA	NA		KAI8120740.1	389	NA	NA
KAI8120724.1	404	-0.327411	0.00338841		KAI8120724.1	393	NA	NA		KAI8120724.1	387	NA	NA
KAI8120700.1	401	NA	NA		#N/A	#N/A	#N/A	#N/A		KAI8120700.1	384	NA	NA
KAI8120643.1	398	-0.184023	0.0561931		KAI8120643.1	388	-1.52008	2.25818e-11		KAI8120643.1	381	-1.26761	7.45699e-10
KAI8120451.1	389	-0.700408	5.61881e-16		KAI8120451.1	379	-3.09498	0		KAI8120451.1	373	-3.41632	0
KAI8120202.1	371	0.161784	0.205773		KAI8120202.1	361	-2.08028	0		KAI8120202.1	355	-3.04281	9.85057e-11
KAI8120181.1	370	-1.83702	9.5768e-11		KAI8120181.1	360	0.009212	0.953479		KAI8120181.1	354	-1.72588	2.47048e-08
KAI8120144.1	366	NA	NA		KAI8120144.1	356	NA	NA		#N/A	#N/A	#N/A	#N/A
KAI8120143.1	365	1.91464	0		KAI8120143.1	355	-1.03507	1.10592e-08		KAI8120143.1	350	0.66185	2.00744e-08
KAI8120138.1	364	4.1172	1.63784e-07		KAI8120138.1	354	-0.338691	9.91927e-05		KAI8120138.1	349	4.2616	1.86486e-07
KAI8120048.1	361	1.57405	0		KAI8120048.1	351	-3.27399	0		KAI8120048.1	346	-1.49638	2.99618e-06
KAI8120045.1	360	2.45332	0		KAI8120045.1	350	1.42903	0		KAI8120045.1	345	3.89144	0
KAI8119884.1	347	0.316888	0		KAI8119884.1	337	-1.71125	0		KAI8119884.1	333	-1.28623	0
KAI8119799.1	342	0.704667	0.000779785		KAI8119799.1	332	-1.26949	3.62126e-10		KAI8119799.1	329	0.0226441	0.920505
KAI8119755.1	337	-0.49287	1.11022e-15		KAI8119755.1	327	-1.08989	0		KAI8119755.1	324	-1.82419	0
KAI8119719.1	335	1.26592	0		KAI8119719.1	325	0.874295	0		KAI8119719.1	322	2.04455	0
KAI8119718.1	334	0.41779	3.99759e-07		KAI8119718.1	324	1.49836	0		KAI8119718.1	321	1.69936	0
KAI8119716.1	333	-0.189083	0.0230766		KAI8119716.1	323	-1.36633	5.66503e-12		KAI8119716.1	320	-1.51122	3.89543e-11
KAI8119712.1	332	1.11223	0		KAI8119712.1	322	1.14345	0		KAI8119712.1	319	1.99073	0
KAI8119700.1	330	0.32729	2.13525e-07		KAI8119700.1	320	NA	NA		KAI8119700.1	317	NA	NA
KAI8119645.1	325	1.011	0		KAI8119645.1	315	1.88501	0		KAI8119645.1	312	2.45146	0
KAI8119641.1	324	-2.025	0		KAI8119641.1	314	1.08226	0		KAI8119641.1	311	-0.591934	0
KAI8119640.1	323	-2.47959	0		KAI8119640.1	313	0.453231	0.00699509		KAI8119640.1	310	-0.777126	0.00135726
KAI8119639.1	322	-2.15948	0		KAI8119639.1	312	1.55813	0		KAI8119639.1	309	-1.23738	0
KAI8119632.1	321	0.664262	0		KAI8119632.1	311	-2.01292	0		KAI8119632.1	308	-1.53846	0
KAI8119630.1	320	0.66887	0		KAI8119630.1	310	-2.03267	0		KAI8119630.1	307	-1.70617	0
KAI8119619.1	319	0.391357	0.000656445		KAI8119619.1	309	-0.158977	0.160527		KAI8119619.1	306	0.19721	0.268923
KAI8119583.1	315	0.325941	0.284778		KAI8119583.1	306	NA	NA		KAI8119583.1	302	NA	NA
KAI8119576.1	314	0.179306	1.25724e-06		KAI8119576.1	305	NA	NA		KAI8119576.1	301	NA	NA
KAI8119568.1	313	-2.87192	0		KAI8119568.1	304	1.30007	0		KAI8119568.1	300	-1.59343	0
KAI8119566.1	312	-3.13198	3.25869e-15		KAI8119566.1	303	0.166928	0.364368		KAI8119566.1	299	-0.670154	0.03744
KAI8119184.1	286	2.38614	0		KAI8119184.1	277	-0.594527	5.49043e-08		KAI8119184.1	276	1.77941	1.27899e-12
KAI8119175.1	285	1.68314	7.56843e-07		KAI8119175.1	276	NA	NA		KAI8119175.1	275	NA	NA
KAI8119159.1	283	1.11127	0		KAI8119159.1	274	3.27721	0		KAI8119159.1	273	4.08883	0
KAI8119158.1	282	1.64478	3.52311e-08		KAI8119158.1	273	3.0346	0		KAI8119158.1	272	4.54227	1.16711e-14
KAI8119156.1	281	0.57925	7.83863e-08		KAI8119156.1	272	3.62843	0		KAI8119156.1	271	4.12816	0
KAI8119025.1	269	-0.551975	0.000805632		KAI8119025.1	260	1.46904	5.71157e-13		KAI8119025.1	259	-0.0543653	0.685686
KAI8119006.1	267	1.22749	0		KAI8119006.1	258	-0.0235257	0.614807		KAI8119006.1	257	1.32945	0
KAI8118969.1	265	-0.434284	2.08231e-11		KAI8118969.1	256	-3.48742	0		KAI8118969.1	255	-3.82964	0
KAI8118890.1	255	2.11403	0		KAI8118890.1	247	-2.87045	0		KAI8118890.1	245	-0.8071	1.20407e-09
KAI8118888.1	254	2.23768	0		KAI8118888.1	246	-2.1721	0		KAI8118888.1	244	0.0166448	0.774034
KAI8118819.1	247	2.26209	0		KAI8118819.1	240	-2.6345	0		KAI8118819.1	238	-0.793774	5.59602e-09
KAI8118737.1	239	0.289924	0.0115229		KAI8118737.1	232	-0.164116	0.0160533		KAI8118737.1	230	NA	NA
KAI8118652.1	230	0.990331	2.11497e-05		KAI8118652.1	224	-0.0588191	0.331912		KAI8118652.1	221	1.0646	5.1263e-08
KAI8118620.1	228	-1.64959	0		KAI8118620.1	222	0.39251	2.42832e-05		KAI8118620.1	219	-1.24578	0
KAI8118339.1	214	0.507709	6.40752e-07		KAI8118339.1	209	-0.986452	1.40474e-09		KAI8118339.1	207	-0.821448	1.97398e-06
KAI8118030.1	193	-1.36011	0		KAI8118030.1	189	-0.642811	3.31448e-06		KAI8118030.1	188	-1.80798	0
KAI8117909.1	183	1.13188	1.78585e-09		KAI8117909.1	179	-1.22066	0.000415312		KAI8117909.1	179	-0.3394	0.0818722
KAI8117805.1	176	0.135263	0.0153899		KAI8117805.1	172	-3.63413	5.50397e-07		KAI8117805.1	172	-3.75699	3.7021e-07
KAI8117649.1	167	-2.13304	0		KAI8117649.1	164	1.82653	0		KAI8117649.1	163	-0.408343	1.44891e-06
KAI8117625.1	166	NA	NA		#N/A	#N/A	#N/A	#N/A		KAI8117625.1	162	NA	NA
KAI8117285.1	147	2.14632	0		KAI8117285.1	145	NA	NA		KAI8117285.1	144	NA	NA
KAI8117249.1	146	-0.132695	0.00371738		KAI8117249.1	144	-1.73445	0		KAI8117249.1	143	-1.87637	0
KAI8116988.1	133	-2.33591	0		KAI8116988.1	131	1.57696	0		KAI8116988.1	130	-0.38047	0.00025691
KAI8116984.1	131	-1.95114	5.36787e-15		KAI8116984.1	129	1.15302	3.08801e-06		KAI8116984.1	128	-0.792947	1.71493e-10
KAI8116982.1	130	-2.41667	0		KAI8116982.1	128	0.548233	0.00474071		KAI8116982.1	127	-1.91553	0
KAI8116851.1	126	-0.665227	0		KAI8116851.1	124	-1.51069	0		KAI8116851.1	124	-2.09334	0
KAI8116790.1	122	1.46127	2.09826e-14		KAI8116790.1	120	NA	NA		KAI8116790.1	121	NA	NA
KAI8116782.1	121	3.00507	0		KAI8116782.1	119	-2.40297	0		KAI8116782.1	120	0.904291	0
KAI8116543.1	108	NA	NA		KAI8116543.1	107	-2.19157	0.000294212		KAI8116543.1	107	NA	NA
KAI8116460.1	99	4.49867	0		KAI8116460.1	98	0.699925	0		KAI8116460.1	98	4.97523	0
KAI8116275.1	91	0.741348	6.73809e-08		KAI8116275.1	90	-0.588599	1.24517e-05		KAI8116275.1	91	0.698447	2.84759e-07
KAI8116029.1	83	0.379742	1.01759e-10		KAI8116029.1	83	-1.4522	0		KAI8116029.1	83	-1.05347	0
KAI8115873.1	78	-2.62763	0		KAI8115873.1	77	0.924903	1.91076e-07		KAI8115873.1	77	-1.37886	1.07561e-13
KAI8115733.1	74	2.51934	0		KAI8115733.1	73	1.27265	0		KAI8115733.1	73	4.28276	0
KAI8115699.1	72	NA	NA		KAI8115699.1	71	-0.140495	0.0450229		KAI8115699.1	72	NA	NA
KAI8115698.1	71	NA	NA		KAI8115698.1	70	-0.157533	0.500018		KAI8115698.1	71	NA	NA
KAI8115628.1	68	0.0250004	0.791992		KAI8115628.1	67	NA	NA		KAI8115628.1	68	NA	NA
KAI8115627.1	67	NA	NA		KAI8115627.1	66	-0.0339104	0.847759		KAI8115627.1	67	NA	NA
KAI8115589.1	64	-0.938431	0		KAI8115589.1	63	-0.958866	2.63437e-13		KAI8115589.1	64	-1.93656	0
KAI8115542.1	57	-0.489196	8.05971e-10		KAI8115542.1	56	-0.969081	0		KAI8115542.1	57	-2.37351	0
KAI8115455.1	54	1.15963	1.06094e-08		KAI8115455.1	53	0.621715	1.81477e-06		KAI8115455.1	54	2.34718	0
KAI8115448.1	53	2.95814	0		KAI8115448.1	52	0.978963	0		KAI8115448.1	53	4.05283	0
KAI8115447.1	52	1.45283	0		KAI8115447.1	51	0.0491836	0.782239		KAI8115447.1	52	1.2032	0.000450563
KAI8115292.1	41	0.326726	0.00380388		KAI8115292.1	40	-1.91523	9.6155e-12		KAI8115292.1	41	-0.704047	8.89884e-05
KAI8115258.1	38	0.961683	9.61256e-10		KAI8115258.1	37	-2.11616	0		KAI8115258.1	38	-0.496541	0.0476874
KAI8115217.1	33	-0.355063	0.000222464		KAI8115217.1	33	NA	NA		KAI8115217.1	33	NA	NA
KAI8115177.1	30	NA	NA		KAI8115177.1	30	-1.92033	0		KAI8115177.1	30	NA	NA
#N/A	#N/A	#N/A	#N/A		KAI8115125.1	24	NA	NA		KAI8115125.1	24	NA	NA
KAI8114930.1	10	0.121161	0.203952		KAI8114930.1	10	0.126537	0.0272892		KAI8114930.1	9	-2.51846	1.82895e-10
KAI8114905.1	9	0.49215	1.50676e-11		KAI8114905.1	9	-0.721254	0		KAI8114905.1	8	-0.162902	0.113348
KAI8114830.1	6	-1.30639	7.17135e-13		KAI8114830.1	6	-1.8461	0		KAI8114830.1	5	-2.41793	2.67343e-13
KAI8126873.1	818	4.93324	0		KAI8126873.1	788	-0.994309	0		KAI8126873.1	785	3.30021	0

## Sheet: S3 - Proteomic GOstats
Higher in Milk vs Sera.txt_gostats													Higher_Milk vs Sheep.txt_gostats													Higher_Sera vs Sheep.txt_gostats.txt
GOID	Pvalue	OddsRatio	ExpCount	Count	Size	Term	Ontology	Proteins	Pvalue_bonferroni	Pvalue_fdr_bh	Log10 FDR		GOID	Pvalue	OddsRatio	ExpCount	Count	Size	Term	Ontology	Proteins	Pvalue_bonferroni	Pvalue_fdr_bh	Log10 FDR		GOID	Pvalue	OddsRatio	ExpCount	Count	Size	Term	Ontology	Proteins	Pvalue_bonferroni	Pvalue_fdr_bh	Log10 FDR
GO:0005783	0.00059089	3.75	9.40625	18	42	endoplasmic reticulum	CC	CALUB_SALSA;DJSHV_DROME;ENPL_RAT;ERP44_MOUSE;GLT25_DROPS;HYOU1_DANRE;LMAN1_HUMAN;NCLN_HUMAN;OST48_DROME;PDIA4_RAT;PLOD_DROME;SSRA_HUMAN;SSRB_CANLF;SSRD_MOUSE;TGO1_DROME;TMEDA_DROMO;UGT5_DACCO;VAS1_DROME	0.0779974	0.0362176	1.44108		GO:0005783	1.89504e-09	9.61497	14.2188	31	42	endoplasmic reticulum	CC	BIP_DROME;CALR_DROME;CALUB_SALSA;DJSHV_DROME;ENPL_RAT;ERP44_MOUSE;FKB14_PONAB;GLT25_DROPS;HYOU1_DANRE;KPYM_FELCA;LMAN1_HUMAN;NCLN_HUMAN;NOMO2_HUMAN;OST48_DROME;PDIA4_RAT;PDIA6_DROME;PDI_DROME;PLOD_DROME;PRDX4_MOUSE;PXDN_MOUSE;RPN1_MOUSE;RPN2_PONAB;SELT_DROME;SSRA_HUMAN;SSRB_CANLF;SSRD_MOUSE;TMEDA_DROMO;TXND5_DROME;UGGG_DROME;UGT5_DACCO;VAS1_DROME	3.27842e-07	3.27842e-07	6.48434		GO:0044444	1.11669e-05	3.73563	37.125	52	81	cytoplasmic part	CC	APLP_DROME;APOD_BOVIN;BIP_DROME;CALR_DROME;CALUB_SALSA;CATL_SARPE;CD109_HUMAN;CREG1_MOUSE;DCUP_DROME;DYH8_MOUSE;EI3D1_DROGR;ENPL_RAT;ERP44_MOUSE;FKB14_PONAB;FRIH_ECHGR;GELS_DROME;GLT25_DROPS;HYOU1_DANRE;ILVC_ACET2;ITBX_DROME;KPYM_FELCA;LAMA_DROME;LAMP1_CHICK;LMAN1_HUMAN;MA2B1_CAVPO;MAGE1_MACFA;NCLN_HUMAN;NOMO2_HUMAN;OST48_DROME;PDIA4_RAT;PDIA6_DROME;PDI_DROME;PLOD_DROME;PPB_BOMMO;PXDN_MOUSE;RENR_…	0.00266889	0.00183396	2.73661
GO:0031984	0.000803485	4.8563	5.15104	12	23	organelle subcompartment	CC	CALUB_SALSA;ENPL_RAT;ERP44_MOUSE;LMAN1_HUMAN;MA2B1_CAVPO;NCLN_HUMAN;OST48_DROME;SSRA_HUMAN;SSRB_CANLF;SSRD_MOUSE;TGO1_DROME;VAS1_DROME	0.10606	0.0362176	1.44108		GO:0044432	6.03954e-07	8.14583	10.4948	23	31	endoplasmic reticulum part	CC	BIP_DROME;CALR_DROME;CALUB_SALSA;ENPL_RAT;ERP44_MOUSE;FKB14_PONAB;GLT25_DROPS;HYOU1_DANRE;LMAN1_HUMAN;NCLN_HUMAN;NOMO2_HUMAN;OST48_DROME;PDIA4_RAT;PDIA6_DROME;PDI_DROME;RPN1_MOUSE;RPN2_PONAB;SELT_DROME;SSRA_HUMAN;SSRB_CANLF;SSRD_MOUSE;UGGG_DROME;VAS1_DROME	0.000104484	4.33753e-05	4.36276		GO:0012505	1.95275e-05	4.07323	25.6667	39	56	endomembrane system	CC	APOD_BOVIN;BIP_DROME;CALR_DROME;CALUB_SALSA;CD109_HUMAN;CREG1_MOUSE;ENPL_RAT;ERP44_MOUSE;FKB14_PONAB;GLT25_DROPS;HYOU1_DANRE;KPYM_FELCA;LAMA_DROME;LAMP1_CHICK;LMAN1_HUMAN;MA2B1_CAVPO;NCLN_HUMAN;NOMO2_HUMAN;OST48_DROME;PDIA4_RAT;PDIA6_DROME;PDI_DROME;PLOD_DROME;PXDN_MOUSE;QRIC2_HUMAN;RENR_DROME;RPN1_MOUSE;RPN2_PONAB;SELT_DROME;SGK3_HUMAN;SSRA_HUMAN;SSRB_CANLF;SSRD_MOUSE;TMEDA_DROMO;TRF_BLADI;TXND5…	0.00466708	0.00183396	2.73661
GO:0098827	0.00137188	4.77813	4.70312	11	21	endoplasmic reticulum subcompartment	CC	CALUB_SALSA;ENPL_RAT;ERP44_MOUSE;LMAN1_HUMAN;NCLN_HUMAN;OST48_DROME;SSRA_HUMAN;SSRB_CANLF;SSRD_MOUSE;TGO1_DROME;VAS1_DROME	0.181088	0.0362176	1.44108		GO:0012505	7.52173e-07	5.2346	18.9583	34	56	endomembrane system	CC	BIP_DROME;CALR_DROME;CALUB_SALSA;CREG1_MOUSE;DJSHV_DROME;ENPL_RAT;ERP44_MOUSE;FKB14_PONAB;GLT25_DROPS;HYOU1_DANRE;KPYM_FELCA;LAMA_DROME;LMAN1_HUMAN;MA2B1_CAVPO;NCLN_HUMAN;NOMO2_HUMAN;OST48_DROME;PDIA4_RAT;PDIA6_DROME;PDI_DROME;PLOD_DROME;PRDX4_MOUSE;PXDN_MOUSE;RPN1_MOUSE;RPN2_PONAB;SELT_DROME;SSRA_HUMAN;SSRB_CANLF;SSRD_MOUSE;TMEDA_DROMO;TXND5_DROME;UGGG_DROME;UGT5_DACCO;VAS1_DROME	0.000130126	4.33753e-05	4.36276		GO:0005783	3.515e-05	4.59809	19.25	31	42	endoplasmic reticulum	CC	APOD_BOVIN;BIP_DROME;CALR_DROME;CALUB_SALSA;ENPL_RAT;ERP44_MOUSE;FKB14_PONAB;GLT25_DROPS;HYOU1_DANRE;KPYM_FELCA;LMAN1_HUMAN;NCLN_HUMAN;NOMO2_HUMAN;OST48_DROME;PDIA4_RAT;PDIA6_DROME;PDI_DROME;PLOD_DROME;PXDN_MOUSE;RENR_DROME;RPN1_MOUSE;RPN2_PONAB;SELT_DROME;SSRA_HUMAN;SSRB_CANLF;SSRD_MOUSE;TMEDA_DROMO;TXND5_DROME;UGGG_DROME;UGT5_DACCO;VAS1_DROME	0.00840085	0.00183396	2.73661
GO:0005789	0.00137188	4.77813	4.70312	11	21	endoplasmic reticulum membrane	CC	CALUB_SALSA;ENPL_RAT;ERP44_MOUSE;LMAN1_HUMAN;NCLN_HUMAN;OST48_DROME;SSRA_HUMAN;SSRB_CANLF;SSRD_MOUSE;TGO1_DROME;VAS1_DROME	0.181088	0.0362176	1.44108		GO:0043231	9.90795e-06	4.09217	23.0208	37	68	intracellular membrane-bounded organelle	CC	BIP_DROME;CALR_DROME;CALUB_SALSA;CATL_SARPE;CREG1_MOUSE;CYP6_CAEEL;DJSHV_DROME;ENPL_RAT;ERP44_MOUSE;FKB14_PONAB;GLT25_DROPS;HYOU1_DANRE;KPYM_FELCA;LMAN1_HUMAN;MA2B1_CAVPO;NCLN_HUMAN;NDKA_DROME;NOMO2_HUMAN;OST48_DROME;PDIA4_RAT;PDIA6_DROME;PDI_DROME;PLOD_DROME;PPB_BOMMO;PRDX4_MOUSE;PXDN_MOUSE;RPN1_MOUSE;RPN2_PONAB;SELT_DROME;SSRA_HUMAN;SSRB_CANLF;SSRD_MOUSE;TMEDA_DROMO;TXND5_DROME;UGGG_DROME;UGT5_…	0.00171407	0.000428519	3.36803		GO:0043226	3.60404e-05	3.40714	38.9583	53	85	organelle	CC	APLP_DROME;APOD_BOVIN;BIP_DROME;CALR_DROME;CALUB_SALSA;CATL_SARPE;CD109_HUMAN;CREG1_MOUSE;CYP6_CAEEL;DYH8_MOUSE;EI3D1_DROGR;ENPL_RAT;ERP44_MOUSE;FAS2_DROME;FKB14_PONAB;GELS_DROME;GLT25_DROPS;HYOU1_DANRE;ITBX_DROME;KPYM_FELCA;LAMA_DROME;LAMP1_CHICK;LMAN1_HUMAN;MA2B1_CAVPO;MAGE1_MACFA;NCLN_HUMAN;NDKA_DROME;NOMO2_HUMAN;OST48_DROME;PDIA4_RAT;PDIA6_DROME;PDI_DROME;PLOD_DROME;PPB_BOMMO;PXDN_MOUSE;QRIC2…	0.00861366	0.00183396	2.73661
GO:0042175	0.00137188	4.77813	4.70312	11	21	nuclear outer membrane-endoplasmic reticulum membrane network	CC	CALUB_SALSA;ENPL_RAT;ERP44_MOUSE;LMAN1_HUMAN;NCLN_HUMAN;OST48_DROME;SSRA_HUMAN;SSRB_CANLF;SSRD_MOUSE;TGO1_DROME;VAS1_DROME	0.181088	0.0362176	1.44108		GO:0043227	3.57786e-05	3.64865	25.7292	39	76	membrane-bounded organelle	CC	APLP_DROME;BIP_DROME;CALR_DROME;CALUB_SALSA;CATL_SARPE;CREG1_MOUSE;CYP6_CAEEL;DJSHV_DROME;ENPL_RAT;ERP44_MOUSE;FKB14_PONAB;GLT25_DROPS;HYOU1_DANRE;KPYM_FELCA;LAMA_DROME;LMAN1_HUMAN;MA2B1_CAVPO;NCLN_HUMAN;NDKA_DROME;NOMO2_HUMAN;OST48_DROME;PDIA4_RAT;PDIA6_DROME;PDI_DROME;PLOD_DROME;PPB_BOMMO;PRDX4_MOUSE;PXDN_MOUSE;RPN1_MOUSE;RPN2_PONAB;SELT_DROME;SSRA_HUMAN;SSRB_CANLF;SSRD_MOUSE;TMEDA_DROMO;TXND5_…	0.00618969	0.00123794	2.9073		GO:0043229	3.83674e-05	3.40143	38.0417	52	83	intracellular organelle	CC	APLP_DROME;APOD_BOVIN;BIP_DROME;CALR_DROME;CALUB_SALSA;CATL_SARPE;CD109_HUMAN;CREG1_MOUSE;CYP6_CAEEL;DYH8_MOUSE;EI3D1_DROGR;ENPL_RAT;ERP44_MOUSE;FKB14_PONAB;GELS_DROME;GLT25_DROPS;HYOU1_DANRE;ITBX_DROME;KPYM_FELCA;LAMA_DROME;LAMP1_CHICK;LMAN1_HUMAN;MA2B1_CAVPO;MAGE1_MACFA;NCLN_HUMAN;NDKA_DROME;NOMO2_HUMAN;OST48_DROME;PDIA4_RAT;PDIA6_DROME;PDI_DROME;PLOD_DROME;PPB_BOMMO;PXDN_MOUSE;QRIC2_HUMAN;RENR…	0.0091698	0.00183396	2.73661
GO:0044432	0.00172802	3.74848	6.94271	14	31	endoplasmic reticulum part	CC	CALUB_SALSA;ENPL_RAT;ERP44_MOUSE;GLT25_DROPS;HYOU1_DANRE;LMAN1_HUMAN;NCLN_HUMAN;OST48_DROME;PDIA4_RAT;SSRA_HUMAN;SSRB_CANLF;SSRD_MOUSE;TGO1_DROME;VAS1_DROME	0.228099	0.0380165	1.42003		GO:0005788	5.26317e-05	14.1509	4.73958	12	14	endoplasmic reticulum lumen	CC	BIP_DROME;CALR_DROME;CALUB_SALSA;ENPL_RAT;ERP44_MOUSE;FKB14_PONAB;GLT25_DROPS;HYOU1_DANRE;PDIA4_RAT;PDIA6_DROME;PDI_DROME;UGGG_DROME	0.00910528	0.00151755	2.81886		GO:0005737	6.42322e-05	3.25517	45.375	59	99	cytoplasm	CC	APLP_DROME;APOD_BOVIN;AROA_MANHA;BIP_DROME;CALR_DROME;CALUB_SALSA;CATL_SARPE;CD109_HUMAN;CREG1_MOUSE;CYP6_CAEEL;DCUP_DROME;DYH8_MOUSE;EI3D1_DROGR;ENPL_RAT;ERP44_MOUSE;FAS2_DROME;FKB14_PONAB;FRIH_ECHGR;GELS_DROME;GLT25_DROPS;HYOU1_DANRE;IF2_LACP7;ILVC_ACET2;ITBX_DROME;KPYM_FELCA;LAMA_DROME;LAMP1_CHICK;LMAN1_HUMAN;MA2B1_CAVPO;MAGE1_MACFA;NCASE_DROME;NCLN_HUMAN;NDKA_DROME;NOMO2_HUMAN;OST48_DROME;PDI…	0.0153515	0.00255858	2.592
Higher in Sera vs Milk.txt_gostats													GO:0044444	9.65232e-05	3.3561	27.4219	40	81	cytoplasmic part	CC	APLP_DROME;BIP_DROME;CALR_DROME;CALUB_SALSA;CATL_SARPE;CREG1_MOUSE;DCUP_DROME;DJSHV_DROME;ENPL_RAT;ERP44_MOUSE;FKB14_PONAB;FRIH_ECHGR;GELS_DROME;GLT25_DROPS;HYOU1_DANRE;KPYM_FELCA;LAMA_DROME;LMAN1_HUMAN;MA2B1_CAVPO;NCLN_HUMAN;NOMO2_HUMAN;OST48_DROME;PDIA4_RAT;PDIA6_DROME;PDI_DROME;PLOD_DROME;PPB_BOMMO;PRDX4_MOUSE;PXDN_MOUSE;RPN1_MOUSE;RPN2_PONAB;SELT_DROME;SSRA_HUMAN;SSRB_CANLF;SSRD_MOUSE;TMEDA_D…	0.0166985	0.0023855	2.62242		GO:0044432	0.000106751	5.19643	14.2083	24	31	endoplasmic reticulum part	CC	BIP_DROME;CALR_DROME;CALUB_SALSA;ENPL_RAT;ERP44_MOUSE;FKB14_PONAB;GLT25_DROPS;HYOU1_DANRE;LMAN1_HUMAN;NCLN_HUMAN;NOMO2_HUMAN;OST48_DROME;PDIA4_RAT;PDIA6_DROME;PDI_DROME;RENR_DROME;RPN1_MOUSE;RPN2_PONAB;SELT_DROME;SSRA_HUMAN;SSRB_CANLF;SSRD_MOUSE;UGGG_DROME;VAS1_DROME	0.0255134	0.00364478	2.43833
GOID	Pvalue	OddsRatio	ExpCount	Count	Size	Term	Ontology	Proteins	Pvalue_bonferroni	Pvalue_fdr_bh			GO:0043226	0.000156142	3.22254	28.776	41	85	organelle	CC	APLP_DROME;BIP_DROME;CALR_DROME;CALUB_SALSA;CATL_SARPE;CREG1_MOUSE;CYP6_CAEEL;DJSHV_DROME;ENPL_RAT;ERP44_MOUSE;FAS2_DROME;FKB14_PONAB;GELS_DROME;GLT25_DROPS;HYOU1_DANRE;KPYM_FELCA;LAMA_DROME;LMAN1_HUMAN;MA2B1_CAVPO;NCLN_HUMAN;NDKA_DROME;NOMO2_HUMAN;OST48_DROME;PDIA4_RAT;PDIA6_DROME;PDI_DROME;PLOD_DROME;PPB_BOMMO;PRDX4_MOUSE;PXDN_MOUSE;RPN1_MOUSE;RPN2_PONAB;SELT_DROME;SSRA_HUMAN;SSRB_CANLF;SSRD_MO…	0.0270125	0.00298964	2.52438		GO:0043227	0.000264305	2.96468	34.8333	47	76	membrane-bounded organelle	CC	APLP_DROME;APOD_BOVIN;BIP_DROME;CALR_DROME;CALUB_SALSA;CATL_SARPE;CD109_HUMAN;CREG1_MOUSE;CYP6_CAEEL;EI3D1_DROGR;ENPL_RAT;ERP44_MOUSE;FKB14_PONAB;GLT25_DROPS;HYOU1_DANRE;KPYM_FELCA;LAMA_DROME;LAMP1_CHICK;LMAN1_HUMAN;MA2B1_CAVPO;MAGE1_MACFA;NCLN_HUMAN;NDKA_DROME;NOMO2_HUMAN;OST48_DROME;PDIA4_RAT;PDIA6_DROME;PDI_DROME;PLOD_DROME;PPB_BOMMO;PXDN_MOUSE;QRIC2_HUMAN;RENR_DROME;RH2A_PLAF7;RPN1_MOUSE;RPN2…	0.063169	0.00789612	2.10259
													GO:0031984	0.000214408	5.59767	7.78646	16	23	organelle subcompartment	CC	CALR_DROME;CALUB_SALSA;ENPL_RAT;ERP44_MOUSE;LMAN1_HUMAN;MA2B1_CAVPO;NCLN_HUMAN;NOMO2_HUMAN;OST48_DROME;RPN1_MOUSE;RPN2_PONAB;SELT_DROME;SSRA_HUMAN;SSRB_CANLF;SSRD_MOUSE;VAS1_DROME	0.0370926	0.00298964	2.52438		GO:0005622	0.00120869	2.56522	48.125	59	105	intracellular	CC	APLP_DROME;APOD_BOVIN;AROA_MANHA;BIP_DROME;CALR_DROME;CALUB_SALSA;CATL_SARPE;CD109_HUMAN;CREG1_MOUSE;CYP6_CAEEL;DCUP_DROME;DYH8_MOUSE;EI3D1_DROGR;ENPL_RAT;ERP44_MOUSE;FAS2_DROME;FKB14_PONAB;FRIH_ECHGR;GELS_DROME;GLT25_DROPS;HYOU1_DANRE;IF2_LACP7;ILVC_ACET2;ITBX_DROME;KPYM_FELCA;LAMA_DROME;LAMP1_CHICK;LMAN1_HUMAN;MA2B1_CAVPO;MAGE1_MACFA;NCASE_DROME;NCLN_HUMAN;NDKA_DROME;NOMO2_HUMAN;OST48_DROME;PDI…	0.288877	0.0288877	1.53929
Reduced													GO:0043229	0.000223815	3.12558	28.099	40	83	intracellular organelle	CC	APLP_DROME;BIP_DROME;CALR_DROME;CALUB_SALSA;CATL_SARPE;CREG1_MOUSE;CYP6_CAEEL;DJSHV_DROME;ENPL_RAT;ERP44_MOUSE;FKB14_PONAB;GELS_DROME;GLT25_DROPS;HYOU1_DANRE;KPYM_FELCA;LAMA_DROME;LMAN1_HUMAN;MA2B1_CAVPO;NCLN_HUMAN;NDKA_DROME;NOMO2_HUMAN;OST48_DROME;PDIA4_RAT;PDIA6_DROME;PDI_DROME;PLOD_DROME;PPB_BOMMO;PRDX4_MOUSE;PXDN_MOUSE;RPN1_MOUSE;RPN2_PONAB;SELT_DROME;SSRA_HUMAN;SSRB_CANLF;SSRD_MOUSE;TMEDA_D…	0.0387199	0.00298964	2.52438		GO:0044424	0.00120869	2.56522	48.125	59	105	intracellular part	CC	APLP_DROME;APOD_BOVIN;AROA_MANHA;BIP_DROME;CALR_DROME;CALUB_SALSA;CATL_SARPE;CD109_HUMAN;CREG1_MOUSE;CYP6_CAEEL;DCUP_DROME;DYH8_MOUSE;EI3D1_DROGR;ENPL_RAT;ERP44_MOUSE;FAS2_DROME;FKB14_PONAB;FRIH_ECHGR;GELS_DROME;GLT25_DROPS;HYOU1_DANRE;IF2_LACP7;ILVC_ACET2;ITBX_DROME;KPYM_FELCA;LAMA_DROME;LAMP1_CHICK;LMAN1_HUMAN;MA2B1_CAVPO;MAGE1_MACFA;NCASE_DROME;NCLN_HUMAN;NDKA_DROME;NOMO2_HUMAN;OST48_DROME;PDI…	0.288877	0.0288877	1.53929
TermID	Name	Value	LogSize	Frequency	Uniqueness	Dispensability	Representative						GO:0098827	0.000224655	6.05	7.10938	15	21	endoplasmic reticulum subcompartment	CC	CALR_DROME;CALUB_SALSA;ENPL_RAT;ERP44_MOUSE;LMAN1_HUMAN;NCLN_HUMAN;NOMO2_HUMAN;OST48_DROME;RPN1_MOUSE;RPN2_PONAB;SELT_DROME;SSRA_HUMAN;SSRB_CANLF;SSRD_MOUSE;VAS1_DROME	0.0388653	0.00298964	2.52438		GO:0005788	0.00188531	8.05263	6.41667	12	14	endoplasmic reticulum lumen	CC	BIP_DROME;CALR_DROME;CALUB_SALSA;ENPL_RAT;ERP44_MOUSE;FKB14_PONAB;GLT25_DROPS;HYOU1_DANRE;PDIA4_RAT;PDIA6_DROME;PDI_DROME;UGGG_DROME	0.450589	0.0409627	1.38761
GO:0005789	endoplasmic reticulum membrane	-1.44108	5.80529	1.7786	0.14201	0	null						GO:0005789	0.000224655	6.05	7.10938	15	21	endoplasmic reticulum membrane	CC	CALR_DROME;CALUB_SALSA;ENPL_RAT;ERP44_MOUSE;LMAN1_HUMAN;NCLN_HUMAN;NOMO2_HUMAN;OST48_DROME;RPN1_MOUSE;RPN2_PONAB;SELT_DROME;SSRA_HUMAN;SSRB_CANLF;SSRD_MOUSE;VAS1_DROME	0.0388653	0.00298964	2.52438		GO:0043231	0.00232825	2.48779	31.1667	41	68	intracellular membrane-bounded organelle	CC	APOD_BOVIN;BIP_DROME;CALR_DROME;CALUB_SALSA;CATL_SARPE;CREG1_MOUSE;CYP6_CAEEL;EI3D1_DROGR;ENPL_RAT;ERP44_MOUSE;FKB14_PONAB;GLT25_DROPS;HYOU1_DANRE;KPYM_FELCA;LAMP1_CHICK;LMAN1_HUMAN;MA2B1_CAVPO;MAGE1_MACFA;NCLN_HUMAN;NDKA_DROME;NOMO2_HUMAN;OST48_DROME;PDIA4_RAT;PDIA6_DROME;PDI_DROME;PLOD_DROME;PPB_BOMMO;PXDN_MOUSE;QRIC2_HUMAN;RENR_DROME;RPN1_MOUSE;RPN2_PONAB;SELT_DROME;SSRA_HUMAN;SSRB_CANLF;SSRD_…	0.556452	0.046371	1.33375
GO:0031984	organelle subcompartment	-1.44108	5.89116	2.16743	0.677338	0.230836	null						GO:0042175	0.000224655	6.05	7.10938	15	21	nuclear outer membrane-endoplasmic reticulum membrane network	CC	CALR_DROME;CALUB_SALSA;ENPL_RAT;ERP44_MOUSE;LMAN1_HUMAN;NCLN_HUMAN;NOMO2_HUMAN;OST48_DROME;RPN1_MOUSE;RPN2_PONAB;SELT_DROME;SSRA_HUMAN;SSRB_CANLF;SSRD_MOUSE;VAS1_DROME	0.0388653	0.00298964	2.52438		GO:0098827	0.00296925	4.4	9.625	16	21	endoplasmic reticulum subcompartment	CC	CALR_DROME;CALUB_SALSA;ENPL_RAT;ERP44_MOUSE;LMAN1_HUMAN;NCLN_HUMAN;NOMO2_HUMAN;OST48_DROME;RENR_DROME;RPN1_MOUSE;RPN2_PONAB;SELT_DROME;SSRA_HUMAN;SSRB_CANLF;SSRD_MOUSE;VAS1_DROME	0.709651	0.04731	1.32505
													GO:0005737	0.00107741	2.74286	33.5156	44	99	cytoplasm	CC	APLP_DROME;BIP_DROME;CALR_DROME;CALUB_SALSA;CATL_SARPE;CREG1_MOUSE;CYP6_CAEEL;DCUP_DROME;DJSHV_DROME;ENPL_RAT;ERP44_MOUSE;FAS2_DROME;FKB14_PONAB;FRIH_ECHGR;GELS_DROME;GLT25_DROPS;HGD_STRAW;HYOU1_DANRE;KPYM_FELCA;LAMA_DROME;LMAN1_HUMAN;MA2B1_CAVPO;NCLN_HUMAN;NDKA_DROME;NOMO2_HUMAN;OST48_DROME;PDIA4_RAT;PDIA6_DROME;PDI_DROME;PLOD_DROME;PPB_BOMMO;PRDX4_MOUSE;PXDN_MOUSE;RPN1_MOUSE;RPN2_PONAB;SELT_DRO…	0.186392	0.0133137	1.8757		GO:0005789	0.00296925	4.4	9.625	16	21	endoplasmic reticulum membrane	CC	CALR_DROME;CALUB_SALSA;ENPL_RAT;ERP44_MOUSE;LMAN1_HUMAN;NCLN_HUMAN;NOMO2_HUMAN;OST48_DROME;RENR_DROME;RPN1_MOUSE;RPN2_PONAB;SELT_DROME;SSRA_HUMAN;SSRB_CANLF;SSRD_MOUSE;VAS1_DROME	0.709651	0.04731	1.32505
													GO:0005791	0.00400357	inf	1.69271	5	5	rough endoplasmic reticulum	CC	KPYM_FELCA;PDI_DROME;RPN1_MOUSE;SSRD_MOUSE;UGGG_DROME	0.692618	0.0461745	1.3356		GO:0042175	0.00296925	4.4	9.625	16	21	nuclear outer membrane-endoplasmic reticulum membrane network	CC	CALR_DROME;CALUB_SALSA;ENPL_RAT;ERP44_MOUSE;LMAN1_HUMAN;NCLN_HUMAN;NOMO2_HUMAN;OST48_DROME;RENR_DROME;RPN1_MOUSE;RPN2_PONAB;SELT_DROME;SSRA_HUMAN;SSRB_CANLF;SSRD_MOUSE;VAS1_DROME	0.709651	0.04731	1.32505
													GO:0044446	0.00429809	2.51222	18.6198	27	55	intracellular organelle part	CC	BIP_DROME;CALR_DROME;CALUB_SALSA;ENPL_RAT;ERP44_MOUSE;FKB14_PONAB;GELS_DROME;GLT25_DROPS;HYOU1_DANRE;LMAN1_HUMAN;MA2B1_CAVPO;NCLN_HUMAN;NDKA_DROME;NOMO2_HUMAN;OST48_DROME;PDIA4_RAT;PDIA6_DROME;PDI_DROME;PPB_BOMMO;RPN1_MOUSE;RPN2_PONAB;SELT_DROME;SSRA_HUMAN;SSRB_CANLF;SSRD_MOUSE;UGGG_DROME;VAS1_DROME	0.743569	0.0464731	1.3328		GO:0031984	0.00373048	3.9108	10.5417	17	23	organelle subcompartment	CC	CALR_DROME;CALUB_SALSA;ENPL_RAT;ERP44_MOUSE;LMAN1_HUMAN;MA2B1_CAVPO;NCLN_HUMAN;NOMO2_HUMAN;OST48_DROME;RENR_DROME;RPN1_MOUSE;RPN2_PONAB;SELT_DROME;SSRA_HUMAN;SSRB_CANLF;SSRD_MOUSE;VAS1_DROME	0.891584	0.0477156	1.32134
													Higher_Sheep vs Milk.txt_gostats													GO:0044446	0.00392878	2.48854	25.2083	34	55	intracellular organelle part	CC	BIP_DROME;CALR_DROME;CALUB_SALSA;CD109_HUMAN;DYH8_MOUSE;ENPL_RAT;ERP44_MOUSE;FKB14_PONAB;GELS_DROME;GLT25_DROPS;HYOU1_DANRE;LAMP1_CHICK;LMAN1_HUMAN;MA2B1_CAVPO;NCLN_HUMAN;NDKA_DROME;NOMO2_HUMAN;OST48_DROME;PDIA4_RAT;PDIA6_DROME;PDI_DROME;PPB_BOMMO;QRIC2_HUMAN;RENR_DROME;RL19_GEODF;RL7_METCA;RPN1_MOUSE;RPN2_PONAB;SELT_DROME;SSRA_HUMAN;SSRB_CANLF;SSRD_MOUSE;UGGG_DROME;VAS1_DROME	0.938979	0.0477156	1.32134
													GOID	Pvalue	OddsRatio	ExpCount	Count	Size	Term	Ontology	Proteins	Pvalue_bonferroni	Pvalue_fdr_bh			GO:0044422	0.00394494	2.46141	26.125	35	57	organelle part	CC	BIP_DROME;CALR_DROME;CALUB_SALSA;CD109_HUMAN;DYH8_MOUSE;ENPL_RAT;ERP44_MOUSE;FKB14_PONAB;GELS_DROME;GLT25_DROPS;HYOU1_DANRE;ITBX_DROME;LAMP1_CHICK;LMAN1_HUMAN;MA2B1_CAVPO;NCLN_HUMAN;NDKA_DROME;NOMO2_HUMAN;OST48_DROME;PDIA4_RAT;PDIA6_DROME;PDI_DROME;PPB_BOMMO;QRIC2_HUMAN;RENR_DROME;RL19_GEODF;RL7_METCA;RPN1_MOUSE;RPN2_PONAB;SELT_DROME;SSRA_HUMAN;SSRB_CANLF;SSRD_MOUSE;UGGG_DROME;VAS1_DROME	0.94284	0.0477156	1.32134
																										GO:0005623	0.00399293	2.4601	60.0417	69	131	cell	CC	APH4_DROME;APLP_DROME;APOD_BOVIN;AROA_MANHA;BIP_DROME;CALR_DROME;CALUB_SALSA;CATL_SARPE;CD109_HUMAN;CH16_DROME;CH18_DROSU;CH36_DROVI;CH38_DROME;CREG1_MOUSE;CYP6_CAEEL;DCUP_DROME;DYH8_MOUSE;EI3D1_DROGR;ENPL_RAT;ERP44_MOUSE;FAS2_DROME;FKB14_PONAB;FRIH_ECHGR;GELS_DROME;GILT1_DROME;GLT25_DROPS;HYOU1_DANRE;IF2_LACP7;ILVC_ACET2;ITBX_DROME;KPYM_FELCA;LACH_SCHAM;LAMA_DROME;LAMP1_CHICK;LIPHA_XENLA;LMAN1_H…	0.954311	0.0477156	1.32134
													Reduced													GO:0044464	0.00399293	2.4601	60.0417	69	131	cell part	CC	APH4_DROME;APLP_DROME;APOD_BOVIN;AROA_MANHA;BIP_DROME;CALR_DROME;CALUB_SALSA;CATL_SARPE;CD109_HUMAN;CH16_DROME;CH18_DROSU;CH36_DROVI;CH38_DROME;CREG1_MOUSE;CYP6_CAEEL;DCUP_DROME;DYH8_MOUSE;EI3D1_DROGR;ENPL_RAT;ERP44_MOUSE;FAS2_DROME;FKB14_PONAB;FRIH_ECHGR;GELS_DROME;GILT1_DROME;GLT25_DROPS;HYOU1_DANRE;IF2_LACP7;ILVC_ACET2;ITBX_DROME;KPYM_FELCA;LACH_SCHAM;LAMA_DROME;LAMP1_CHICK;LIPHA_XENLA;LMAN1_H…	0.954311	0.0477156	1.32134
													TermID	Name	Value	LogSize	Frequency	Uniqueness	Dispensability	Representative						Higher_Sheep vs Sera.txt_gostats
													GO:0005737	cytoplasm	-1.8757	7.11614	36.3851	0.797296	0.14236	null						GOID	Pvalue	OddsRatio	ExpCount	Count	Size	Term	Ontology	Proteins	Pvalue_bonferroni	Pvalue_fdr_bh
													GO:0005783	endoplasmic reticulum	-6.48413	6.01615	2.89027	0.401368	0	null
													GO:0005788	endoplasmic reticulum lumen	-2.81886	4.56913	0.103253	0.496049	0.49814	null						Reduced
													GO:0005791	rough endoplasmic reticulum	-1.3356	4.40261	0.0703678	0.509324	0.480459	null						TermID	Name	Value	LogSize	Frequency	Uniqueness	Dispensability	Representative
													GO:0012505	endomembrane system	-4.36251	6.3527	6.27311	0.999863	5.841e-05	null						GO:0005622	intracellular anatomical structure	-1.53929	7.26578	51.3527	0.999736	0.00021216	null
													GO:0031984	organelle subcompartment	-2.52438	5.89116	2.16743	0.681722	0.246032	null						GO:0005737	cytoplasm	-2.592	7.11614	36.3851	0.808974	0.308176	null
													GO:0043226	organelle	-2.52438	7.08991	34.2527	0.999797	9.601e-05	null						GO:0005783	endoplasmic reticulum	-2.73661	6.01615	2.89027	0.453693	0	null
													GO:0043231	intracellular membrane-bounded organelle	-3.36803	6.99558	27.5652	0.528888	0.375503	null						GO:0005788	endoplasmic reticulum lumen	-1.38761	4.56913	0.103253	0.554848	0.49814	null
																										GO:0012505	endomembrane system	-2.73661	6.3527	6.27311	0.999851	9.601e-05	null
																										GO:0031984	organelle subcompartment	-1.32134	5.89116	2.16743	0.704411	0.246032	null
																										GO:0043226	organelle	-2.73661	7.08991	34.2527	0.999769	7.989e-05	null
																										GO:0043229	intracellular organelle	-2.73661	7.08051	33.5191	0.585854	0.303833	null

## Sheet: S4 - Shared Resposne GOstats
Scatter Shared Response
Up in Milk vs Sera and Sheep
GOID	Pvalue	OddsRatio	ExpCount	Count	Size	Term	Ontology	Proteins	Pvalue_bonferroni
GO:0005783	9.31e-06	6.60571	6.78125	17	42	endoplasmic reticulum	CC	CALUB_SALSA;DJSHV_DROME;ENPL_RAT;ERP44_MOUSE;GLT25_DROPS;HYOU1_DANRE;LMAN1_HUMAN;NCLN_HUMAN;OST48_DROME;PDIA4_RAT;PLOD_DROME;SSRA_HUMAN;SSRB_CANLF;SSRD_MOUSE;TMEDA_DROMO;UGT5_DACCO;VAS1_DROME	0.00107974	-2.96668
GO:0044432	0.00013215	5.73765	5.00521	13	31	endoplasmic reticulum part	CC	CALUB_SALSA;ENPL_RAT;ERP44_MOUSE;GLT25_DROPS;HYOU1_DANRE;LMAN1_HUMAN;NCLN_HUMAN;OST48_DROME;PDIA4_RAT;SSRA_HUMAN;SSRB_CANLF;SSRD_MOUSE;VAS1_DROME	0.0153289	-1.81449
GO:0098827	0.00030472	6.49351	3.39062	10	21	endoplasmic reticulum subcompartment	CC	CALUB_SALSA;ENPL_RAT;ERP44_MOUSE;LMAN1_HUMAN;NCLN_HUMAN;OST48_DROME;SSRA_HUMAN;SSRB_CANLF;SSRD_MOUSE;VAS1_DROME	0.0353474	-1.45164
GO:0005789	0.00030472	6.49351	3.39062	10	21	endoplasmic reticulum membrane	CC	CALUB_SALSA;ENPL_RAT;ERP44_MOUSE;LMAN1_HUMAN;NCLN_HUMAN;OST48_DROME;SSRA_HUMAN;SSRB_CANLF;SSRD_MOUSE;VAS1_DROME	0.0353474	-1.45164
GO:0042175	0.00030472	6.49351	3.39062	10	21	nuclear outer membrane-endoplasmic reticulum membrane network	CC	CALUB_SALSA;ENPL_RAT;ERP44_MOUSE;LMAN1_HUMAN;NCLN_HUMAN;OST48_DROME;SSRA_HUMAN;SSRB_CANLF;SSRD_MOUSE;VAS1_DROME	0.0353474	-1.45164
Down in Milk vs Sera and Sheep
GOID	Pvalue	OddsRatio	ExpCount	Count	Size	Term	Ontology	Proteins	Pvalue_bonferroni
-

## Sheet: S5 - Transcriptomics RPKM
Feature ID	CVS40	KAI	Homolog	Milk_1	Milk_2	Milk_3	Meat_1	Meat_2	Meat_3	Sera_1	Sera_2	Sera_3
CVS40_0082	CVS40_0082	KAI8131018.1	NPC2_DANRE	4.47315	3.78248	2.38511	46.95	24.3678	75.3591	499.951	222.128	316.227
CVS40_7071	CVS40_7071	KAI8121959.1	EXOG_HUMAN	2177.08	2173.9	1658.05	12112.1	12829.2	12456.8	25979.7	24574.7	12568
CVS40_6575	CVS40_6575	KAI8122513.1	COGS_LEPPG	3.15665	2.2586	1.66157	7.00873	7.65818	9.07087	11.4505	19.7333	14.1957
CVS40_3271	CVS40_3271	KAI8126586.1	CIP2A_CHICK	1.99519	0	0.975191	3.89925	2.79668	1.46143	7.28048	14.7092	4.93727
CVS40_0380	CVS40_0380	KAI8130077.1	#N/A	0	0	0	2.20877	0	1.67408	0	0.923642	0
Dh31	CVS40_10534	KAI8117662.1	DIUX_DROME	0.463838	0.172564	0	1.67352	0.682676	0.815403	2.1873	1.81317	0.688684
CVS40_0435	CVS40_0435	KAI8130188.1	SNAG_BOVIN	19.457	10.7111	23.2899	46.9198	29.6387	22.1049	84.2625	107.021	77.3807
CVS40_6089	CVS40_6089	KAI8123192.1	ZAN_MOUSE	0.277992	2.32712	2.3098	3.38501	5.84482	4.47959	7.1396	9.86569	7.86781
CVS40_12185	CVS40_12185	KAI8115505.1	TX11A_CORWE	0.301132	0.140045	0	1.08648	0.949729	0.33086	1.52147	1.39399	0.13972
CVS40_3102	CVS40_3102	KAI8127335.1	C5IT3_RHISA	22.5013	12.6552	1.5346	82.6004	34.6577	15.3318	54.1998	61.9049	36.4195
CVS40_4686	CVS40_4686	KAI8124783.1	NU301_CAEEL	28.4719	12.4957	0.588011	182.846	54.5945	14.9804	74.2908	74.0476	23.4441
B3glct	CVS40_9140	KAI8119432.1	B3GLT_MOUSE	0.379235	0.352748	0.185361	0.855173	1.09638	0.972236	1.03788	0.975296	0.967777
CVS40_11155	CVS40_11155	KAI8116835.1	GST3_SCHPO	7.05264	2.96765	1.64149	13.4803	8.12047	3.32094	14.8472	12.4372	6.70046
CVS40_3044	CVS40_3044	KAI8127225.1	R1AB_BEV	73.3897	33.8753	5.93352	39.818	14.5026	6.87112	148.227	130.557	46.0851
CVS40_0343	CVS40_0343	KAI8130373.1	CUD9_SCHGR	7.2664	1.76319	0	5.41441	0	4.39684	5.85286	7.79994	2.19881
CVS40_2118	CVS40_2118	KAI8128173.1	URT1_DESRO	97.4744	60.9654	83.9498	53.8142	54.4169	45.7932	297.05	157.669	220.363
CVS40_0303	CVS40_0303	KAI8130844.1	TX11A_ETHRU	0.691821	0.321751	0.150294	1.17871	1.25258	0.365982	1.48879	1.18613	0.499325
CVS40_6241	CVS40_6241	KAI8123032.1	FHAB_BORPE	1.99364	1.5616	1.53858	5.77335	4.96393	1.53715	5.21313	5.07316	3.11585
CVS40_8520	CVS40_8520	KAI8120211.1	CABIN_HUMAN	1.50646	3.20285	1.05188	6.79413	6.33489	3.31035	5.98037	6.64155	2.5962
CVS40_3015	CVS40_3015	KAI8127569.1	PLMN_PIG	2.4392	0.918338	0.340632	6.54807	2.0148	0.765712	4.45034	3.7638	1.29343
Sp24D	CVS40_2578	KAI8127782.1	SP24D_ANOGA	156.482	148.674	84.4526	95.0589	128.73	90.5966	242.694	239.521	123.325
CVS40_7751	CVS40_7751	KAI8121270.1	SVMI1_CERCE	544.569	363.712	271.885	1402.69	514.148	297.657	967.121	1337.82	734.923
CVS40_9455	CVS40_9455	KAI8119159.1	TSEP_GLOPP	0.718126	0.445313	0.234012	2.80691	0	0.350675	1.61259	0.98498	0.888533
QRICH2	CVS40_12779	KAI8114905.1	QRIC2_HUMAN	71.4798	80.9376	15.5561	67.4661	48.6597	14.938	228.126	185.878	45.0037
CVS40_6211	CVS40_6211	KAI8123107.1	UBP12_BOVIN	2.44438	2.24894	2.06483	8.3999	5.27914	3.19168	6.65613	5.38437	4.84482
CVS40_7017	CVS40_7017	KAI8121969.1	GRM_DROME	1.67418	1.0182	0.0629353	1.80051	1.69235	0.801813	3.25338	1.85471	1.25482
CVS40_3530	CVS40_3530	KAI8126469.1	LCP82_DROME	24.0639	17.4414	14.9695	57.7875	32.526	29.3008	42.896	51.7593	38.281
CVS40_3240	CVS40_3240	KAI8126805.1	DEF96_ARATH	2.03655	1.36257	2.20037	2.96492	2.66685	2.72175	5.14482	3.49166	4.6086
CVS40_8434	CVS40_8434	KAI8120263.1	NOC3_SCHPO	1.20543	1.68185	1.76753	4.89281	0.633623	0	3.0452	4.34007	3.3558
CVS40_12186	CVS40_12186	KAI8115502.1	RL20_DICNV	0.129602	1.085	1.07692	3.27336	1.29442	1.61389	1.6371	2.19989	1.74394
CVS40_9480	CVS40_9480	KAI8119000.1	DF109_ARATH	8.41951	7.83147	5.19818	17.3871	9.31718	6.65399	18.8443	18.4619	9.66352
CCHa1	CVS40_8968	KAI8119561.1	CCHA1_DROME	2.17471	1.47114	1.73935	3.95289	3.15224	3.25826	4.13426	3.59295	3.45517
CVS40_4619	CVS40_4619	KAI8125169.1	LECA_SARPE	0.790289	0.183767	0.193147	0.356419	0.41541	0.289435	0.998231	0.812969	0.550023
CVS40_3042	CVS40_3042	KAI8127228.1	ENPP_APLCA	0	0.407722	0.428493	0	0	0	0	0.901833	0.813527
CVS40_8805	CVS40_8805	KAI8119852.1	IR12_HCMVA	0.393685	0.842234	0.654235	1.59796	2.73158	1.93205	0.928241	1.45794	1.42478
CVS40_4337	CVS40_4337	KAI8125509.1	LYAM1_RAT	459.739	307.511	153.084	1081.43	521.445	228.185	753.621	769.028	328.382
CVS40_5423	CVS40_5423	KAI8124038.1	CDI8_ARATH	27.3664	33.6572	39.5333	56.5	48.5892	65.0359	46.0895	81.6402	71.671
CVS40_8547	CVS40_8547	KAI8120141.1	NM111_ASPTN	0.568453	0.528751	0.277845	1.53823	0.597607	0.41638	0.837697	1.02334	0.791262
CVS40_4745	CVS40_4745	KAI8124834.1	OVCH2_XENLA	23.57	21.9238	23.8031	22.5107	24.3233	34.4021	41.3011	44.6598	48.8106
CEL	CVS40_7332	KAI8121699.1	ZN318_MOUSE	1.41085	1.05995	0.901765	1.56626	1.25502	0.596203	2.74166	2.00955	1.61136
CVS40_3432	CVS40_3432	KAI8126879.1	PE48A_LUCCU	13648.7	15684.3	17520.4	19825.5	21813.5	25499.7	27581.7	25277.1	34333.7
CVS40_9699	CVS40_9699	KAI8118734.1	SYE_METS3	214.987	235.169	201.622	279.436	341.86	228.899	403.217	479.956	320.089
sev	CVS40_8129	KAI8120597.1	7LESS_DROVI	0.915222	2.00171	0.531966	4.90855	3.71862	2.42787	3.04111	4.73289	2.52494
CVS40_0087	CVS40_0087	KAI8131021.1	ESTJ_TRICA	0	0	0	0	3.05041	3.29797	0	0	0
CVS40_3332	CVS40_3332	KAI8126718.1	MLRP2_ACRMI	4.28457	4.96132	6.5817	4.88999	5.2397	5.63623	8.02586	8.00552	11.441
CVS40_5911	CVS40_5911	KAI8123518.1	YFAS1_CANGB	791.88	903.544	938.962	805.801	778.703	1192.67	1393.3	1572.04	1582
Cht10	CVS40_1696	KAI8128837.1	CHI10_DROME	8217.8	9219.78	11135	10216.6	11348.1	12457.9	14680.8	15448.4	18970
sas	CVS40_1111	KAI8129704.1	SAS_DROME	38.1238	28.8932	22.6755	64.3895	40.3395	28.6054	55.4441	55.9755	41.0106
CVS40_0747	CVS40_0747	KAI8130387.1	PE55_LUCCU	5018.28	5990.88	8837.82	7456.37	7269.38	7147.22	8915.33	11633	13210.8
CVS40_4929	CVS40_4929	KAI8124417.1	PCE_TACTR	2.46913	3.36582	4.20314	3.18713	2.4615	4.05373	4.83954	5.6055	6.20226
grnd	CVS40_0027	KAI8130128.1	GRND_DROME	10.0633	8.20247	7.60619	14.0368	10.4704	8.51105	15.4631	14.0874	12.8043
CVS40_11044	CVS40_11044	KAI8116973.1	MAS_DROME	1.59694	0.417769	0.195136	1.30539	4.30202	2.48566	2.22724	0.821383	0.509406
CVS40_9800	CVS40_9800	KAI8118553.1	TX51A_ETHRU	12.0811	10.6659	9.80812	16.438	12.7007	12.2988	16.8979	19.8002	16.5313
CVS40_4084	CVS40_4084	KAI8125792.1	MUCL2_MOUSE	0	0	0	0	0	0	1.21267	0	0
CVS40_6122	CVS40_6122	KAI8123120.1	HTHR_MYCTO	17.097	11.4536	12.2223	13.4137	11.1029	9.60919	27.3584	21.9236	16.8763
EGF1	CVS40_12575	KAI8115215.1	CSMD1_MOUSE	27.3891	24.0663	15.5485	57.0657	36.4421	33.1622	45.0165	38.6307	21.8752
immp2l	CVS40_9324	KAI8119074.1	IMP2L_DANRE	4.36789	4.80152	3.10532	5.01433	6.26169	4.07195	6.35312	7.76106	5.5272
Cad99C	CVS40_8909	KAI8119499.1	CAD99_DROME	18.2953	14.2987	8.11327	34.7623	18.2852	12.5551	26.1935	25.3166	13.4949
betaTry	CVS40_2878	KAI8127468.1	SCARF_DROME	69.9444	62.451	36.471	115.781	73.9409	37.255	100.81	105.444	60.931
to	CVS40_0345	KAI8130361.1	TAKT_DROME	8.69185	4.95391	0.708055	55.7257	19.6638	6.67868	11.84	14.0256	4.70504
CVS40_3962	CVS40_3962	KAI8125914.1	ZAN_MOUSE	11.8563	10.1409	10.6575	27.9447	24.1647	21.3619	18.0936	16.7294	16.103
Alk	CVS40_6896	KAI8122044.1	LTK_DANRE	3.90716	2.08436	0.533595	8.5774	3.89612	0.904869	4.91103	3.48732	1.59959
CVS40_4210	CVS40_4210	KAI8125658.1	SCX27_TITSE	58.0296	43.5118	32.994	41.6604	34.2379	34.2646	79.7807	61.5224	64.29
CVS40_7796	CVS40_7796	KAI8121091.1	GLPO_STRPN	53.7641	45.5082	18.0445	39.6044	23.9274	14.571	75.7581	65.6311	37.4186
CVS40_7468	CVS40_7468	KAI8121508.1	MAGE1_MACFA	7132.93	8020.82	9623.05	7882.29	8440.61	9599.18	10308.7	12499.4	15055.1
fog	CVS40_5258	KAI8124251.1	FOG_DROME	27.5899	25.3671	25.8822	42.8872	34.6888	32.381	37.0924	41.3866	41.5397
CVS40_5261	CVS40_5261	KAI8124110.1	CDA1_BOMMO	136.608	86.0213	51.3992	275.451	119.741	73.1445	185.974	156.666	76.4462
CVS40_9525	CVS40_9525	KAI8118812.1	SQTKS_PHOSM	69.9432	57.8047	50.8983	87.7614	64.7017	50.5289	90.923	93.3012	84.8333
CVS40_12438	CVS40_12438	KAI8115447.1	FBX7_MOUSE	22549.2	22167.3	29432.8	23475.1	22414.4	20067.2	30766.7	36735.9	44105.1
Helq	CVS40_3843	KAI8126289.1	HELQ_DROME	22.6705	16.9587	6.89088	49.1398	23.9247	10.7411	30.7059	28.2002	10.4582
CVS40_7469	CVS40_7469	KAI8121509.1	KR122_HUMAN	11219.9	12537.9	16301.2	12641.7	13930.8	14215	15656.1	20350.1	23429
Spon2	CVS40_5652	KAI8123875.1	SPON2_RAT	16.1557	14.8447	16.657	30.7837	25.8636	23.8114	23.9835	21.9235	24.5614
CVS40_0838	CVS40_0838	KAI8130212.1	ANR17_HUMAN	18.1634	13.0109	9.59206	31.8251	21.0703	9.63415	21.9757	22.98	15.1115
CVS40_5488	CVS40_5488	KAI8123620.1	ENTK_MOUSE	17.5793	10.3393	10.5039	26.5512	16.2735	12.9669	18.6166	23.1659	14.8613
kug	CVS40_5394	KAI8124348.1	FAT2_DROME	41.8342	32.1071	17.1465	80.376	42.9937	27.07	57.028	61.4645	38.6469
CVS40_2253	CVS40_2253	KAI8127805.1	ECFA2_THEMA	5.19448	6.26077	5.3639	7.39107	5.23014	6.48431	8.13227	9.25714	7.536
Ces1e	CVS40_0057	KAI8130234.1	EST1E_MOUSE	22.1512	25.2222	16.6137	27.6452	26.5996	16.2253	36.5826	36.0465	22.4163
CVS40_3156	CVS40_3156	KAI8126967.1	TEGU_HCMV	42.2916	31.0163	13.7806	65.0454	46.1705	22.0418	54.1043	40.9954	30.6918
Skeletor	CVS40_0686	KAI8130766.1	SKEL1_DROME	9.92703	9.58884	6.64358	20.8701	11.3995	7.49508	21.3485	13.0398	10.2041
CVS40_11215	CVS40_11215	KAI8116785.1	TPPC8_HUMAN	33.2599	33.3167	10.7735	23.6098	18.8277	7.3519	48.0603	47.9812	17.3497
CVS40_5607	CVS40_5607	KAI8124028.1	DRE21_PHYPA	15.3321	18.1237	30.2878	17.8631	22.4986	19.8872	22.594	29.2441	41.2011
GILT1	CVS40_0492	KAI8129966.1	GILT1_DROME	397.282	324.94	259.233	277.714	256.475	351.359	398.257	454.664	362.873
CVS40_4937	CVS40_4937	KAI8124738.1	CCCP_DROYA	1.17194	0.654053	0.687374	0.634253	1.72486	1.03011	1.57899	1.20557	0.870022
CVS40_8644	CVS40_8644	KAI8119990.1	QVR_DROSI	1.48534	0.705496	0.0308935	2.16644	0.598027	0.254633	1.64996	1.10534	0.381245
CVS40_0104	CVS40_0104	KAI8130909.1	PE44_LUCCU	52.4052	62.9151	81.8065	110.295	105.274	115.157	89.2851	87.1322	106.497
CVS40_11554	CVS40_11554	KAI8116395.1	ATP62_PHOPR	19.1808	19.5934	13.8114	22.7076	20.6146	13.1714	28.6262	26.0734	18.6733
CVS40_5855	CVS40_5855	KAI8123423.1	CHI10_DROME	515.963	592.499	663.241	527.32	580.257	686.188	765.026	763.381	924.947
CVS40_2865	CVS40_2865	KAI8127093.1	TXJ1A_THELO	74.8871	59.2572	18.7653	99.1338	50.1196	22.8684	96.812	75.7342	37.9764
fend	CVS40_2084	KAI8127907.1	FEND_DROME	6.06506	5.16337	5.42642	8.3451	4.97121	8.88506	7.18482	2.53795	7.34528
Fas3	CVS40_4147	KAI8125720.1	FAS3_DROME	12.1659	6.83686	11.2113	23.8333	25.5131	12.9492	24.7046	13.0365	23.1084
CVS40_2894	CVS40_2894	KAI8127514.1	FRRS1_DROME	17.8604	16.6504	15.0946	24.5469	21.489	13.9978	24.5798	23.889	18.9683
CVS40_5713	CVS40_5713	KAI8123949.1	CP6A2_DROME	15.2854	12.4502	8.07686	18.5572	13.2029	8.29129	17.4636	17.679	12.881
Tinagl1	CVS40_2863	KAI8127097.1	TINAL_MOUSE	151.827	119.642	131.462	312.434	225.054	113.135	243.435	212.572	196.635
rsgI2	CVS40_5910	KAI8123553.1	RSGI2_ACET2	7283.13	7494.82	7783.6	8610.96	7972.44	8867.3	8801.81	10846.7	10615.5
CVS40_9189	CVS40_9189	KAI8119417.1	CYPH_NEUCR	177.198	138.516	76.943	298.971	169.653	126.172	216.162	167.432	98.5503
Aper1	CVS40_5908	KAI8123458.1	PE1_ANOGA	14.2757	13.2787	22.5276	10.3013	7.71834	20.764	30.7403	19.7204	45.9876
SVEP1	CVS40_2575	KAI8127761.1	SVEP1_RAT	0	1.14751	0	0	0	0	0	0	0
CVS40_9022	CVS40_9022	KAI8119743.1	NAC50_ARATH	0	0	0	0	0	0	0.328999	0	0
emb-9	CVS40_4011	KAI8125689.1	CO4A1_CAEEL	512.822	516.893	115.533	325.683	186.081	103.277	626.557	638.128	226.072
ECE1	CVS40_0131	KAI8130419.1	ECE1_RAT	6.63972	5.40398	0.991622	8.2349	4.26571	2.02644	13.978	9.01217	4.02207
CVS40_6585	CVS40_6585	KAI8122624.1	DCL2_COCIM	88.0485	77.6962	85.1652	49.2192	54.4423	64.4936	119.704	106.784	98.9077
grik2	CVS40_0804	KAI8130836.1	GRIK2_XENLA	0	0.213821	0	0	0.241659	0.336743	0	0	0
XPNPEP2	CVS40_0125	KAI8130714.1	XPP2_HUMAN	14.476	13.3232	7.74576	14.4318	15.7791	10.715	18.4133	15.9103	10.888
CVS40_3605	CVS40_3605	KAI8126028.1	PROML_DROME	53.5799	52.4764	47.6278	57.7005	56.0669	48.8044	65.9312	70.5841	57.4205
fz	CVS40_11363	KAI8116582.1	FRIZ_DROVI	3.29657	2.64338	3.22254	5.17799	2.98762	2.91425	4.16397	3.39117	3.85027
CVS40_2303	CVS40_2303	KAI8128190.1	EBH_STAES	214.485	131.265	71.8095	293.155	153.854	84.7134	223.027	191.509	102.384
Eogt	CVS40_4039	KAI8125673.1	EOGT_DROME	13.0411	9.65789	6.57714	18.8809	12.2254	9.30899	14.3392	12.9027	8.86437
CVS40_4009	CVS40_4009	KAI8125839.1	RCN2V_CROAD	46.79	41.1748	34.1246	46.4724	40.6782	38.4316	54.276	57.7594	37.7606
CVS40_6976	CVS40_6976	KAI8122161.1	DOCK2_HUMAN	59.5825	49.3343	19.8637	69.276	34.7588	19.6771	67.5744	59.8752	28.764
CVS40_3436	CVS40_3436	KAI8126872.1	PE48A_LUCCU	12752.6	12213.5	14272.7	11867.2	10321.8	11476.6	16327.4	15524.1	15726.2
CVS40_11046	CVS40_11046	KAI8116971.1	VSP_BOMIG	53.3645	43.2736	22.7391	79.2988	55.3821	32.3231	52.1388	59.8226	29.5219
OSTM1	CVS40_7620	KAI8121379.1	OSTM1_HUMAN	7.48052	7.24971	6.87466	9.47466	8.92371	8.15336	8.35493	9.63052	7.81461
CVS40_11403	CVS40_11403	KAI8116543.1	PE1_ANOGA	229.058	291.37	352.183	343.095	407.057	469.729	297.631	337.062	403.651
CVS40_4387	CVS40_4387	KAI8125346.1	ARGDC_PYRAR	728.377	595.365	421.89	912.526	638.46	556.055	776.988	727.196	555.559
CVS40_6763	CVS40_6763	KAI8122359.1	VP3_MYRV9	10.7334	6.52002	6.31686	12.5465	6.79338	6.57842	11.0675	9.01345	7.62269
Appl	CVS40_11311	KAI8116633.1	A4_DROME	0	0	0	0.881109	0	0	0	0	0.90648
CVS40_9777	CVS40_9777	KAI8118651.1	SRCRL_MOUSE	883.425	1045.38	1330.12	1041.55	1077.18	1130.97	1164.52	1288.96	1390.5
CVS40_4680	CVS40_4680	KAI8124776.1	ATG27_YARLI	16.7563	14.6953	9.35999	14.6823	15.6024	14.027	17.7385	18.7146	10.6624
CVS40_10109	CVS40_10109	KAI8118055.1	TRF_BLADI	16.8062	13.2982	9.66403	24.145	12.3917	8.63387	17.7383	15.8022	11.9261
Reg-5	CVS40_1896	KAI8128767.1	REG5_DROME	41.0997	46.5649	46.7219	52.774	32.9201	40.0641	45.6253	54.8888	52.8598
CVS40_5997	CVS40_5997	KAI8123369.1	VATA_HALOH	1471.66	1430.75	508.453	1432.14	1166.89	617.304	1651.45	1610.08	628.681
Dl	CVS40_1427	KAI8129553.1	DL_DROME	16.2478	13.2434	11.3528	16.2167	14.8506	20.6942	17.8195	13.7848	21.865
CVS40_4313	CVS40_4313	KAI8125512.1	CTRB1_PENVA	0.218348	0	0.0291009	1.16376	0.740785	0.697878	0.217281	0.01021	6.11526
MAN2B1	CVS40_7375	KAI8121549.1	MA2B1_CAVPO	9188.35	10445	10510.9	7941.1	8718.05	9232.21	10264.1	11420.5	11281.2
spi	CVS40_3750	KAI8126432.1	SPITZ_DROME	45.8062	36.1999	38.3807	41.9384	52.8623	42.8861	49.8833	42.1607	38.352
NPDC1	CVS40_2977	KAI8127609.1	NPDC1_HUMAN	1.20645	0.88172	0.842399	1.74892	0.996541	0.915261	1.23363	1.01945	0.879647
mew	CVS40_2557	KAI8128306.1	ITA1_DROME	15.3514	15.6479	14.0835	22.068	21.7954	15.9097	14.2402	20.0619	15.8149
Stim	CVS40_2339	KAI8127920.1	STIM_DROME	80.4456	72.5108	59.7617	74.5786	69.6124	63.1682	78.1405	80.1927	60.7395
Ptpn9	CVS40_1444	KAI8129501.1	PTN9_HUMAN	60.2228	61.0892	46.7679	71.2048	67.464	54.7351	50.4891	53.6728	36.5728
ITFG1	CVS40_5956	KAI8123376.1	TIP_HUMAN	116.891	110.434	95.0144	103.525	96.1712	93.9957	102.652	100.204	83.1873
LMAN2	CVS40_8954	KAI8119700.1	LMAN2_CANLF	37.0504	35.1156	28.9404	34.6178	32.4281	26.2665	30.999	32.8789	24.0765
CVS40_1774	CVS40_1774	KAI8128915.1	AFTS1_ALTAL	49.8031	45.4478	35.6304	59.6602	54.1741	44.4201	43.3935	41.0505	28.575
Slh	CVS40_4026	KAI8125824.1	SLY1_DROME	0	0.3974	0	0	0	0	2.23058	0.527401	0
CVS40_4016	CVS40_4016	KAI8125692.1	SELT_DROME	376.914	341.082	290.18	261.993	294.609	238.179	316.316	300.984	245.033
Torsin	CVS40_4500	KAI8125381.1	TORS_DROME	36.5602	38.1466	29.7308	37.0874	38.3238	31.7473	30.162	35.6472	23.4045
wdp	CVS40_1766	KAI8128590.1	WDP_DROME	835.965	858.383	690.321	685.957	697.381	612.535	701.153	770.591	541.396
Dnajc16	CVS40_6509	KAI8122809.1	DJC16_RAT	39.7484	33.9444	25.876	33.9213	31.7905	26.1658	31.0909	29.5213	20.8275
SEL1L	CVS40_9921	KAI8118388.1	SE1L1_MOUSE	218.743	210.213	166.287	151.828	142.328	139.538	172.334	174.072	121.053
BSG	CVS40_4637	KAI8125053.1	BASI_HUMAN	604.008	575.341	416.403	448.71	459.05	324.694	499.355	449.517	296.812
atk	CVS40_1767	KAI8128589.1	ATK_DROME	115.932	113.869	96.8786	118.359	124.916	92.6332	86.2662	82.1268	60.2575
prtp	CVS40_4229	KAI8125435.1	TXND5_DROME	525.364	490.396	428.058	339.508	363.514	320.94	399.878	403.422	288.405
dpyd	CVS40_2499	KAI8128011.1	DPYD_DANRE	409.468	357.303	197.964	288.271	228.739	134.563	292.478	309.924	128.652
mthl5	CVS40_1469	KAI8129450.1	MTH5_DROME	13.2608	14.3317	10.3087	12.1321	11.4846	8.37191	9.83731	12.0174	6.7974
acp2	CVS40_0449	KAI8130383.1	PPAL_XENLA	83.2595	76.0327	73.4416	82.1406	80.4634	64.2416	66.1858	56.9878	51.4077
TMED6	CVS40_3542	KAI8126171.1	TMED6_HUMAN	263.088	249.899	211.591	180.836	181.456	178.968	189.74	193.722	155.467
LINGO4	CVS40_10785	KAI8117264.1	LIGO4_HUMAN	29.0706	26.1262	19.4522	21.2728	21.0917	20.034	19.5149	22.4076	13.5263
Itgbn	CVS40_3982	KAI8125712.1	ITBN_DROME	66.7701	60.1274	49.491	56.9835	60.5524	57.0769	50.109	49.1371	31.7974
Cd63	CVS40_5716	KAI8123952.1	CD63_RABIT	1616.3	1601.07	1411.58	1276.78	1215.77	1237.23	1327.88	1273.86	1290.49
dome	CVS40_4159	KAI8125526.1	DOME_DROME	113.222	119.014	90.5835	102.126	101.933	86.7537	96.1176	84.2763	64.6347
TM9SF4	CVS40_10561	KAI8117629.1	TM9S4_PONAB	135.17	129.804	102.789	96.8944	105.169	88.9061	91.0046	103.41	74.161
Sulf1	CVS40_8092	KAI8120783.1	SULF1_DROME	13.9698	16.3936	13.9232	11.1836	12.6396	11.1083	9.69287	11.6653	10.6498
CVS40_11529	CVS40_11529	KAI8116363.1	ECDA_ASPRU	60.6569	64.3706	64.4157	53.5933	62.1736	42.8143	40.8625	49.3509	45.7978
CCT5	CVS40_3010	KAI8127566.1	TCPE_MACFA	0	0	0	0	0	0	0	0	0
vit-1	CVS40_1009	KAI8129767.1	VIT1_CAEEL	1.82491	13.8958	0.804518	3.79241	3.29155	6.98496	14.4332	7.23307	0.813527
ugt3	CVS40_4725	KAI8125145.1	UGT5_DACCO	26.0484	26.7795	17.901	20.3157	20.5897	15.9955	9.40065	9.77145	6.45196
Mipp1	CVS40_2375	KAI8127990.1	MINP1_DROME	31.7665	30.4002	24.1856	27.5513	21.1934	21.031	20.0625	22.6233	18.1405
Hsc70-3	CVS40_6507	KAI8122808.1	BIP_DROME	4448.38	4224.33	3056.81	1644.45	1810.49	1927.98	3194.13	3233.34	1887.72
LRRN1	CVS40_6737	KAI8122441.1	LRRN1_HUMAN	623.831	617.045	491.086	469.5	589.922	427.578	444.534	454.869	324.029
Hsp90b1	CVS40_9028	KAI8119755.1	ENPL_RAT	1239.34	1120.64	879.73	608.233	582.543	611.912	978.016	815.323	499.578
TTC17	CVS40_8397	KAI8120350.1	TTC17_HUMAN	16.9925	14.005	12.8261	16.1032	15.2635	10.7135	11.5921	11.2846	7.88425
CVS40_9775	CVS40_9775	KAI8118654.1	YR554_MIMIV	336.038	270.326	338.022	211.272	215.103	232.401	197.862	207.816	243.352
hyou1	CVS40_4203	KAI8125208.1	HYOU1_DANRE	523.506	491.689	404.302	329.251	319.843	313.235	338.304	410.815	240.181
CVS40_7257	CVS40_7257	KAI8121875.1	YR787_MIMIV	111.931	113.325	100.006	103.049	122.403	97.1003	80.7478	81.0839	62.5052
CVS40_9774	CVS40_9774	KAI8118652.1	SYFA_METSB	0	0	0	0	0	0	0	0	0
nemp1	CVS40_3476	KAI8126820.1	NEMP_DROME	35.1598	37.1638	28.1211	23.3737	18.8415	21.1549	26.1468	25.8349	15.9958
CVS40_4699	CVS40_4699	KAI8124981.1	ATPB_HELP2	283.403	225.122	286.695	121.679	152.374	208.358	206.124	139.854	169.591
mlec-a	CVS40_3971	KAI8125744.1	MLECA_XENLA	21.4838	20.7477	16.87	12.813	13.0824	8.59915	12.9505	16.9074	8.60641
CVS40_4219	CVS40_4219	KAI8125661.1	TXND_THEPA	130.198	119.388	99.556	109.72	112.358	88.3622	83.9234	88.0239	53.715
Prdx4	CVS40_12763	KAI8114930.1	PRDX4_MOUSE	443.047	433.96	416.114	270.658	284.312	278.311	282.18	325.816	224.928
CVS40_1873	CVS40_1873	KAI8128828.1	ALR_PSEF5	64.6985	55.6132	60.3318	38.589	42.7638	28.2544	41.3409	42.0254	32.2157
Slc9a7	CVS40_9260	KAI8119258.1	SL9A6_MOUSE	58.983	56.0083	39.2411	37.2333	37.9214	42.2329	38.0287	31.4579	26.9719
CVS40_8856	CVS40_8856	KAI8119823.1	LECA_SARPE	2.67974	4.62907	5.98756	1.55386	3.62207	1.12163	1.28946	2.36284	4.44056
FERH	CVS40_8841	KAI8119630.1	FRI_AEDAE	2115.7	2133.17	1741.86	1270.63	1474.09	1195.96	1497.79	1205.69	1007.17
CVS40_8840	CVS40_8840	KAI8119632.1	FRIH_ECHGR	3556.77	3327.69	2657.6	1884.08	2018.81	2204.79	2279.27	1865.81	1552.22
CVS40_6014	CVS40_6014	KAI8123404.1	VDPP4_APIME	898.342	921.443	584.837	595.137	662.725	489.015	552.384	603.115	331.845
CVS40_2202	CVS40_2202	KAI8128354.1	RASP_BACLD	2568.69	2142.61	2668.46	1090.43	1677.94	1556.2	1307.35	1543.3	1640.25
Tmprss9	CVS40_2555	KAI8128308.1	TMPS9_RAT	1.06937	0.49734	0.784015	1.08514	0.562106	1.46867	0.787933	1.37507	0.372128
etaTry	CVS40_2119	KAI8128172.1	TRYU_DROME	793.277	806.38	739.275	729.147	915.595	641.81	507.14	531.822	337.187
Ance	CVS40_1622	KAI8128437.1	ACE_DROME	400.697	351.99	53.5402	156.511	95.32	37.8929	208.746	187.207	64.3215
IGF2R	CVS40_0733	KAI8130894.1	MPRI_HUMAN	153.881	169.064	128.531	130.959	150.741	115.468	99.8392	80.7192	71.0713
CVS40_7801	CVS40_7801	KAI8121058.1	NADO1_ORYSJ	3.95258	6.9205	9.09134	4.82353	5.37743	3.7467	1.95788	3.34848	5.60969
UGT2B15	CVS40_8865	KAI8119608.1	UGT5_DACCO	57.6766	48.6624	60.6782	28.623	23.217	23.6363	31.3257	14.6675	11.938
TMEM165	CVS40_1488	KAI8129374.1	TM165_HUMAN	128.954	127.165	86.1098	80.7956	82.1907	62.648	74.8029	70.1488	40.9864
TSPEAR	CVS40_5520	KAI8123674.1	TSEAR_MOUSE	1.36497	1.26963	1.21301	1.04465	1.04362	0.787729	0.696614	0.595696	0.652516
Creg1	CVS40_9990	KAI8118339.1	CREG1_MOUSE	2558.41	2733.82	2193.53	1669.28	1922.8	1532.3	1496.92	1315.92	1010.24
CVS40_4744	CVS40_4744	KAI8124833.1	MY18B_HUMAN	2.23106	1.11743	0.503298	26.0065	6.31476	1.6342	1.44518	0.35309	0.159265
Gpl	CVS40_1197	KAI8129780.1	GPL_GLOAU	116.926	137.538	111.747	95.6817	93.1426	113.017	76.8067	71.0945	89.4879
CVS40_10930	CVS40_10930	KAI8117161.1	SYP_NEOSM	41.8524	23.6087	43.0241	12.1777	9.65135	21.1625	15.9162	13.0549	23.3027
APN2	CVS40_0526	KAI8130106.1	AMPN_ANOGA	451.948	454.219	249.581	414.668	482.096	333.27	231.387	228.848	110.07
CVS40_2192	CVS40_2192	KAI8128298.1	FTSZ_THEAC	895.396	965.969	921.934	741.126	913.312	718.122	521.767	465.732	373.51
CVS40_5529	CVS40_5529	KAI8123665.1	TRYA4_LUCCU	13.551	14.9387	15.6997	25.3513	10.8164	12.683	5.28287	5.16291	9.5476
SLC24A5	CVS40_10400	KAI8117770.1	NCKX5_HUMAN	359.313	373.608	257.822	287.773	365.784	277.074	157.761	185.364	105.148
CVS40_5458	CVS40_5458	KAI8123794.1	LYS1A_LUCSE	9110.87	10110.7	8149.3	12265.7	14435	10564.3	4570.67	5467.71	2419.88
Npc1b	CVS40_2387	KAI8128318.1	NPC1B_DROME	214.212	209.184	165.315	135.769	193.033	120.266	86.1903	101.006	73.3005
CVS40_0120	CVS40_0120	KAI8130958.1	NANM_VIBVY	16.3646	20.2502	26.8522	8.03937	8.60192	6.42145	7.99749	7.81588	11.1182
CVS40_12304	CVS40_12304	KAI8115585.1	#N/A	16.0125	13.1419	14.7322	7.64644	9.90221	11.7288	5.55218	6.78262	6.11848
Semp1	CVS40_4279	KAI8125620.1	SEMP1_DROME	0	0	0.252357	0	0	0	0	0	0
INHBA	CVS40_9159	KAI8119309.1	INHBA_SHEEP	108.528	106.222	75.5468	69.2637	106.125	85.9045	41.6727	45.2022	26.1928
CVS40_5856	CVS40_5856	KAI8123422.1	PE48_CHRBE	107.913	140.135	137.456	55.4105	38.5524	62.6191	52.5165	32.1976	55.4887
K12H4.7	CVS40_1421	KAI8129559.1	YM67_CAEEL	0	0	0	0	0	0	0	0.133555	0
TNC	CVS40_0072	KAI8130600.1	TENA_CHICK	11.949	10.8257	8.03991	4.89906	7.01501	4.09201	4.57363	4.62941	1.87205
CVS40_0075	CVS40_0075	KAI8130541.1	ASPP_AEDAE	100816	101931	88660.2	87685.8	86952.3	88246.5	43508.8	37437	21534.9
UGT2B10	CVS40_11119	KAI8116886.1	UGT5_DACCO	38.911	45.3284	22.6036	51.2449	49.5323	38.6091	12.1434	18.2874	6.34491
CVS40_0074	CVS40_0074	KAI8130540.1	ASPP_AEDAE	86808.7	86405.2	66588.8	149086	126501	126268	41618.6	25150.2	15750.5
CVS40_7800	CVS40_7800	KAI8121057.1	PHLC_CLOPF	127.366	112.073	78.4385	50.319	76.8573	48.139	46.762	39.0442	20.0926
CVS40_5510	CVS40_5510	KAI8123902.1	LYS1A_LUCSE	18277.4	18548.4	13629.8	19625.8	19447.6	18048.2	5442.59	6045.29	2565.22
CVS40_3897	CVS40_3897	KAI8125975.1	QVR_DROPS	4.19278	3.89995	3.2789	4.53826	2.64469	4.29958	0.706133	0.862622	1.16723
CVS40_12440	CVS40_12440	KAI8115475.1	RS6_PROMA	1.06027	1.64369	1.38195	0.318787	1.11465	0.258875	0.297611	0.363566	0.327966
CVS40_2138	CVS40_2138	KAI8128165.1	MDN1_SCHPO	11.2996	11.6023	16.6404	17.3399	22.9868	21.9278	2.34789	3.77397	2.9959
CVS40_0725	CVS40_0725	KAI8130617.1	BSPH1_HUMAN	3.68203	2.85405	2.39956	0.55353	1.29029	0	0.516761	0.631283	0.569469
CVS40_5532	CVS40_5532	KAI8123969.1	TRYA4_LUCCU	5210.45	5146.26	2814.54	3974.63	3689.39	3244.45	989.88	704.719	659.694
CVS40_0073	CVS40_0073	KAI8130542.1	ASPP_AEDAE	42730.5	46545.9	40213.4	53581.2	53511.6	53410.6	6934.78	3591.2	2159.98
NPC2	CVS40_0084	KAI8131025.1	NPC2_BOVIN	11532.9	11959.2	11573.2	1302.24	5601.79	1879.54	624.379	1258.54	895.874
CVS40_7841	CVS40_7841	KAI8121032.1	MNS1_ARATH	22.303	17.9793	1.45348	6.1693	1.87575	0.43564	1.50248	0.305908	0
CVS40_5750	CVS40_5750	KAI8124016.1	LRK52_ARATH	19.0059	17.6785	16.6572	9.45838	19.9807	16.3217	1.65564	0.674185	0
CVS40_7607	CVS40_7607	KAI8121304.1	VM3H1_PROFL	1.33524	1.03499	0	0	0	0	0	0	0
Amy35	CVS40_2024	KAI8128643.1	AMY1_DROAN	16.8036	11.7658	12.4864	1.51009	2.28151	3.67886	10.3384	13.4587	11.4504
CVS40_3111	CVS40_3111	KAI8126941.1	#N/A	0.379947	0.35341	0.371414	0	0.0998512	0.069567	0.559905	0.39085	0.264422
CVS40_11638	CVS40_11638	KAI8116275.1	AG5L1_CULNU	4207.77	2894.24	2830.47	1402.01	2162.24	2868.33	4377.6	6318.56	4880.59
CVS40_4157	CVS40_4157	KAI8125969.1	SM41_HEMPU	81.4605	61.3756	10.3204	32.897	10.7205	4.8332	67.6871	57.1408	20.4847
CVS40_4359	CVS40_4359	KAI8125571.1	SBPI_SARBU	566.859	445.159	79.5239	202.18	141.022	41.2043	371.67	504.783	230.489
Est-5B	CVS40_9666	KAI8118699.1	EST5B_DROPE	19.9642	17.1771	4.87896	6.07758	4.19761	1.55373	14.2897	12.579	7.17888
CVS40_3245	CVS40_3245	KAI8126802.1	TIM9_ASPFU	2.20121	2.04747	3.22767	1.48912	1.73558	1.61234	5.5608	3.96267	3.57465
CVS40_7838	CVS40_7838	KAI8120988.1	SKT5_CRYNH	95.3335	127.101	14.4025	25.7972	2.73335	1.69284	43.7883	23.4772	9.38283
CVS40_10422	CVS40_10422	KAI8117779.1	PPA5_RAT	12.2049	10.0911	16.7916	7.74695	20.9096	11.9198	21.697	49.2908	32.719
CVS40_7836	CVS40_7836	KAI8121021.1	ATPF_PARBR	261.428	224.754	33.8101	58.5216	29.59	10.3083	94.6056	94.4693	37.6292
CVS40_0638	CVS40_0638	KAI8130430.1	NEP3_DROME	23.9378	24.4092	4.00433	15.9341	7.60348	3.37552	29.9669	22.9129	8.9092
calub	CVS40_12260	KAI8115589.1	CALUB_SALSA	234.18	173.445	53.3606	75.5466	56.0718	43.0356	160.18	155.385	74.6285
CVS40_7777	CVS40_7777	KAI8121078.1	BAG1_RAT	6.05614	6.32013	10.5407	6.52851	5.59031	5.19336	14.3042	10.4845	10.4174
CVS40_8125	CVS40_8125	KAI8120602.1	TXG1A_CORWE	70.2591	96.8266	47.4709	36.1136	22.2673	27.0561	75.9125	41.1864	53.6928
CVS40_9656	CVS40_9656	KAI8118708.1	DEFLU_LUCSE	1.56986	2.19032	0	1.41601	5.77629	4.0246	5.94876	9.68946	6.55551
CVS40_11364	CVS40_11364	KAI8116540.1	SO1B2_MOUSE	1.22667	1.5559	0.763077	1.00586	0.351703	1.30692	1.69029	1.14715	2.17314
CVS40_12437	CVS40_12437	KAI8115455.1	KA172_LYCMC	15219.2	15231.1	20400.3	13844.2	14231	12303.2	20570.6	31071.9	25167.6
CVS40_0039	CVS40_0039	KAI8129997.1	PA1_VESMG	9.16393	11.0495	9.8429	7.9597	6.77942	5.96656	13.7187	12.3365	12.8083
CVS40_7799	CVS40_7799	KAI8121097.1	EF1A_CRYNB	35645.9	29490.4	35818.3	14855	20267.2	19827.5	38098.7	36071.7	30571.5
PapD	CVS40_1965	KAI8128626.1	IMAP_DROFU	0	0	0	0	0	0	0	0	0
Ugt2a1	CVS40_0659	KAI8130300.1	UD2A1_RAT	0	0.114288	0	0.110837	0.1292	0.270028	0.310433	0.25283	0.342096
NAGA	CVS40_10164	KAI8118092.1	NAGAB_CHICK	0	0	0	0	0	0	0	4.47712	0
nAChRbeta2	CVS40_7239	KAI8121848.1	ACH4_DROME	1.7069	1.36087	0.238353	2.19946	1.53809	0.178613	3.28537	2.75925	0.791976
CVS40_9384	CVS40_9384	KAI8119173.1	CUD9_SCHGR	441.906	496.915	129.886	391.986	328.498	116.453	604.961	572.889	267.006
CVS40_7837	CVS40_7837	KAI8121028.1	TRAK1_MOUSE	11.8821	20.4225	1.51503	6.05777	2.71553	0.378407	8.91808	4.51721	2.1573
CVS40_11180	CVS40_11180	KAI8116776.1	LECA_SARPE	1.6792	2.49907	5.25277	4.84683	1.76532	3.44394	6.2217	5.52765	5.29804
CVS40_9397	CVS40_9397	KAI8118975.1	CUD4_LOCMI	1.7415	1.96698	1.82399	3.25386	1.4385	3.6446	4.08521	4.60666	9.46549
CVS40_7797	CVS40_7797	KAI8121092.1	VEF_GVHA	26838.2	24252.4	27806	19083.6	22875.8	20636.7	39481.6	38469.6	27548.9
nep-2	CVS40_0132	KAI8130418.1	NEPL2_CAEEL	8.04263	9.33011	3.71017	6.35782	4.27505	2.71386	13.6973	8.73824	8.05032
CVS40_5107	CVS40_5107	KAI8124671.1	NEPL1_CAEEL	2.33504	1.9745	0.933792	1.72325	0.669489	1.78811	2.94944	1.63776	2.26534
Idgf4	CVS40_3253	KAI8126608.1	IDGF4_GLOMM	1632.13	1374.91	595.485	912.872	644.361	527.394	1279.67	1390.16	778.229
CVS40_12649	CVS40_12649	KAI8115065.1	CADM2_XENTR	5.24432	4.22138	1.18305	3.91165	2.54459	1.55132	5.85989	4.77235	2.52688
CVS40_2204	CVS40_2204	KAI8128265.1	TRF_SARPE	5898.59	4948.57	4021.48	4091.15	2696.42	5701.85	5663.93	5832.22	8459.42
CVS40_7998	CVS40_7998	KAI8120861.1	TRUB_SERP5	0	0	0	0	16.7558	9.9577	46.1855	13.9847	6.09015
Spn28Dc	CVS40_4130	KAI8125842.1	SP28D_DROME	19.5502	18.2807	5.97855	18.2231	9.89717	5.83879	22.886	20.0406	9.62899
CVS40_4667	CVS40_4667	KAI8125014.1	C2D1_DROPS	1355.39	1248.86	331.628	966.902	845.304	327.915	1462.27	1228.62	529.74
Manf	CVS40_8084	KAI8120724.1	ARMET_DROMO	258.122	265.042	260.745	142.492	147.709	141.126	240.153	245.027	163.721
CVS40_1974	CVS40_1974	KAI8128935.1	T178B_DANRE	0.0999631	0	0	0.360642	0.630496	0.219657	0.673371	0	0.463783
Idgf5	CVS40_2962	KAI8127083.1	IDGF5_GLOMM	117.051	82.9026	15.5779	55.2065	33.6544	12.0858	71.2526	56.433	18.4522
cyn-6	CVS40_3038	KAI8127601.1	CYP6_CAEEL	3716.86	3824.44	3685.48	2452.49	2438.49	2749.68	3652.78	3819.69	3402.01
CVS40_12307	CVS40_12307	KAI8115678.1	PKS2_COCH4	2.45766	5.02923	4.80495	3.10353	2.06697	2.8803	4.13911	3.53947	3.64902
PDGFA	CVS40_2171	KAI8128124.1	PDGFA_BOVIN	36.1567	30.0901	32.1208	32.2852	34.289	25.063	41.0043	50.9645	36.2752
CVS40_3438	CVS40_3438	KAI8126875.1	PE44_LUCCU	456.215	490.207	556.742	268.284	322.174	328.956	347.93	515.185	391.792
RYa	CVS40_1677	KAI8128812.1	RYA_DROME	30.5853	27.9103	29.6719	19.7504	19.8526	15.6143	23.5114	29.9137	21.1792
Ppn	CVS40_1968	KAI8128623.1	PPN_DROME	0	0	0	0	0	0	0	0	0
CVS40_5559	CVS40_5559	KAI8123640.1	SP4_POLDO	105.844	91.9559	61.0986	39.8229	43.5624	45.1474	55.2562	62.871	49.8062
CVS40_11674	CVS40_11674	KAI8116214.1	LEDL2_DROME	96.5462	91.6805	13.4826	22.4538	23.6946	7.88494	26.3445	30.7986	12.7989
CVS40_4610	CVS40_4610	KAI8125042.1	CDA8_BOMMO	1945.16	2188.67	2387.19	1399.67	1335.7	1764.68	1704	1856.13	2149.25
ECE2	CVS40_0160	KAI8130656.1	NEP_DROME	5.73305	3.68579	3.29665	9.35378	6.38161	3.02599	4.47272	6.15777	2.50358
TMED2	CVS40_0257	KAI8130523.1	TMED2_CRIGR	444.25	443.325	417.737	301.64	317.027	308.164	409.812	418.16	340.13
NUCB1	CVS40_6821	KAI8122352.1	NUCB1_BOVIN	393.556	325.881	292.542	310.66	303.847	274.323	348.477	405.272	307.729
Gel	CVS40_0652	KAI8130285.1	GELS_DROME	0	0	0	0	0	0	0	0	0
LanB2	CVS40_12200	KAI8115600.1	LAMC1_DROME	165.209	173.669	153.314	165.079	132.772	150.149	166.658	202.015	182.745
loxl2b	CVS40_2010	KAI8128926.1	LOL2B_DANRE	10.5697	12.6554	5.8257	18.3578	12.7668	8.401	19.8843	16.4253	9.70405
CVS40_6771	CVS40_6771	KAI8122267.1	PCE_TACTR	19.5163	16.2856	9.49975	18.473	15.4934	10.1185	19.2072	17.6391	11.4029
CVS40_3186	CVS40_3186	KAI8126796.1	TM2D2_DROME	27.5389	25.6155	27.2488	25.7488	22.5961	22.6316	27.432	25.9109	21.8155
Spn88Ea	CVS40_1487	KAI8129448.1	SP88E_DROME	155.01	148.78	55.702	179.481	111.856	79.4126	167.219	111.839	68.1321
cfaD	CVS40_10851	KAI8117285.1	CFAD_DICDI	253.472	238.911	164.988	253.563	214.703	189.03	234.34	214.819	160.219
CVS40_4110	CVS40_4110	KAI8125977.1	K319L_MOUSE	48.0497	44.1578	34.9182	47.1863	40.0962	40.8925	42.4994	38.1679	33.8959
CVS40_10457	CVS40_10457	KAI8117737.1	ACOHC_MOUSE	1.17739	0.669264	0.319709	0	0.275052	0.622855	0	0.336439	0.606992
CVS40_12905	CVS40_12905	KAI8114759.1	AA13_ASPOR	24.233	18.8279	12.9127	45.0876	29.9715	21.0217	39.1317	28.6432	14.6389
CVS40_7544	CVS40_7544	KAI8121309.1	CBPB_HELZE	63.5738	69.8135	64.9333	116.008	137.03	87.4321	87.0176	117.321	69.2919
Plxdc2	CVS40_7342	KAI8121609.1	PXDC2_MOUSE	344.095	346.439	249.89	318.621	302.874	267.696	273.663	249.333	187.639
CVS40_6745	CVS40_6745	KAI8122470.1	CF157_HUMAN	203.608	199.788	253.688	273.899	248.777	293.191	227.826	196.971	220.138
LRRN2	CVS40_2696	KAI8127079.1	LRRN2_HUMAN	485.882	488.81	444.887	450.574	487.299	456.384	409.886	396.934	303.643
ACVR1	CVS40_9423	KAI8119041.1	ACVR1_CHICK	20.9913	20.3152	15.5382	25.2272	20.5371	17.2865	18.6981	16.913	13.6243
CVS40_5430	CVS40_5430	KAI8124099.1	IF2_LACP7	2.3865	1.58558	0	5.84282	2.50889	1.74806	4.88052	2.10428	0.949114
BVES	CVS40_2356	KAI8127954.1	POPD1_PIG	0.813299	1.22203	0.978505	1.69291	2.82811	1.97047	2.15996	1.60892	1.62555
STX17	CVS40_8474	KAI8120165.1	STX17_HUMAN	6.77116	5.66578	6.03751	8.15195	6.93972	5.16725	6.1313	5.71228	3.65438
PHEX	CVS40_0617	KAI8130391.1	PHEX_HUMAN	0.300909	1.21287	2.15711	0.633311	0.421788	0.661228	0.929095	0.515907	0.837703
CTSB	CVS40_3182	KAI8126792.1	CATB_PIG	1194.82	1318.57	920.257	881.612	840.797	973.142	730.916	605.44	665.567
CVS40_6975	CVS40_6975	KAI8122158.1	FHAB_BORPE	20.9167	57.1882	48.639	140.358	166.253	66.159	96.8745	140.512	45.2901
CVS40_4472	CVS40_4472	KAI8125256.1	#N/A	0.911841	0.61684	0.972397	1.71973	1.1329	1.09293	1.32628	0.938009	0.61539
CVS40_7644	CVS40_7644	KAI8121229.1	LIZ1_SCHPO	1.73087	1.60998	0	4.39986	2.48132	1.15257	3.44507	1.94241	0.438053
fz4	CVS40_10940	KAI8117090.1	FRIZ4_DROME	20.0011	21.7049	20.3667	28.9407	21.903	25.6382	21.9304	17.7889	14.887
CVS40_11257	CVS40_11257	KAI8116709.1	TMED1_XENTR	6.60661	4.39397	3.01162	4.81672	7.62919	3.15927	3.83378	4.47212	3.33538
CVS40_3103	CVS40_3103	KAI8127334.1	TXG1A_SCODE	25.3139	17.6594	1.48473	17.1248	7.71753	3.52297	13.2162	4.42687	1.87925
CA14	CVS40_6272	KAI8123200.1	CAH14_HUMAN	405.023	456.781	265.435	881.402	753.71	569.139	701.787	519.524	291.903
CPM	CVS40_2582	KAI8127831.1	CBPM_PONAB	10.0397	8.847	10.5891	8.69833	8.33258	8.8053	5.45077	6.93052	5.14862
CVS40_4476	CVS40_4476	KAI8125252.1	#N/A	74.4918	65.2591	27.7341	91.2695	68.7619	39.4128	63.6697	45.8628	17.6382
nemp1b	CVS40_5292	KAI8124274.1	NEMP_DROME	2.1381	2.55399	2.27709	3.73531	3.66738	2.90967	2.24583	2.14158	2.02586
CVS40_8918	CVS40_8918	KAI8119663.1	CTNS_DROME	178.509	208.253	270.823	268.388	316.894	257.452	148.192	183.832	172.595
CVS40_5437	CVS40_5437	KAI8124174.1	TSEP_GLOPP	3815.53	3652.4	4616.85	3430.54	4551.41	3820.37	2200.45	2878.69	1966.9
CVS40_11466	CVS40_11466	KAI8116472.1	LAMB4_DANRE	387.788	361.401	398.858	394.056	457.897	363.223	251.616	245.71	137.858
CVS40_4475	CVS40_4475	KAI8125255.1	YL54_CAEEL	3.02603	3.89726	0.227542	2.0996	1.71297	0.682002	1.17608	0.957808	0.215994
CVS40_10178	CVS40_10178	KAI8118064.1	DAE2_IXOSC	4.18165	2.50045	0	10.7767	10.6763	4.37568	6.79106	3.9944	0.55435
CVS40_5531	CVS40_5531	KAI8123968.1	Y0031_DROME	435.84	557.519	237.971	755.662	874.902	433.66	263.074	400.88	190.194
CVS40_0611	CVS40_0611	KAI8130397.1	CADM2_XENTR	0.360555	0.195628	0	0.785947	0.631743	0.330123	0.202425	0.185443	0.0557498
CVS40_12293	CVS40_12293	KAI8115609.1	PYRC_CALBD	1.41287	0.876127	5.52457	4.24802	2.47555	3.44966	0.396584	0.484473	1.3111
CVS40_5457	CVS40_5457	KAI8123795.1	LYS1A_LUCSE	1383.67	1612.5	1125.62	4244.83	4501.36	3517.53	1185.48	965.802	589.496
CVS40_5338	CVS40_5338	KAI8124292.1	HRPS_PSESH	109.738	269.068	124.278	1139.38	770.088	722.486	684.837	344.186	548.828
CVS40_0768	CVS40_0768	KAI8130690.1	VKT39_CYRSC	3.79117	1.46932	0.617672	9.40397	8.9676	4.62825	11.7057	5.52496	3.22492
CVS40_2305	CVS40_2305	KAI8128196.1	PESC_CANAL	1.0151	0.472099	0.165391	2.44164	1.77859	0.867458	1.42465	2.95864	0.470989
cut-1	CVS40_4238	KAI8125187.1	CUT1_CAEEL	0.259175	0.0803657	0.0844459	0.389644	0.726613	0.189849	0.145501	0.533251	0.641381
Kirrel	CVS40_11478	KAI8116461.1	KIRR1_MOUSE	1.39093	0.664374	0.330736	2.8144	1.73891	1.1565	1.42452	1.6242	0.697697
Toll-6	CVS40_7005	KAI8122110.1	TOLL6_DROME	1.58109	0.612776	0.128812	1.90152	1.10812	0.836417	1.22046	1.21985	0.489069
CVS40_7412	CVS40_7412	KAI8121514.1	RSMH_IDILO	0.688815	1.06784	0.11223	1.44972	1.81035	1.00908	1.35342	1.53526	1.2784
CVS40_4601	CVS40_4601	KAI8124841.1	SMAD4_BOVIN	0.206764	0.288465	0.101055	0.559464	0.434706	0.3786	0.783451	0.63805	0.959289
CVS40_6318	CVS40_6318	KAI8123168.1	VKTF_ANEVI	45.6121	23.1814	12.2578	85.96	63.7704	34.0988	41.0489	40.149	25.4542
CVS40_7459	CVS40_7459	KAI8121578.1	GRIK3_MOUSE	0	0	0	0	0	0	0	0	0
CVS40_3155	CVS40_3155	KAI8126966.1	CP450_HELAN	2.31707	1.29314	0.226506	4.17998	2.92308	1.18804	7.21928	2.14521	2.15017
otk	CVS40_8666	KAI8120042.1	PTK7_DROAN	0	0.537425	0.282402	1.56347	0.911116	0.211598	0.973074	1.18872	1.07232
CVS40_7978	CVS40_7978	KAI8120887.1	DPOL_PPV01	0.729771	2.54551	2.3185	2.13932	4.41139	4.40997	5.37711	3.37822	5.41765
REG1A	CVS40_2440	KAI8128175.1	REG1A_HUMAN	0	0	0	2.495	0	0.734459	2.44573	3.34342	0
CVS40_7650	CVS40_7650	KAI8121137.1	LINT_DROME	8.15032	7.4027	7.87356	21.6223	14.0117	19.6657	9.60853	23.1799	14.9486
CVS40_12352	CVS40_12352	KAI8115397.1	CO6A3_HUMAN	119.555	76.4061	28.6213	209.808	120.129	86.6779	110.606	56.0549	59.2453
thbs3a	CVS40_12607	KAI8115172.1	TSP3A_DANRE	9.87977	5.68254	3.12599	16.4454	11.2896	6.36272	12.5798	13.1583	5.44773
CVS40_3234	CVS40_3234	KAI8126629.1	HEM1_FRASN	3.37363	3.83534	2.19858	5.83243	6.40367	4.59901	8.36479	4.04886	2.43493
Ccp84Ab	CVS40_1416	KAI8129168.1	CU01_ANOGA	0.16653	0.61963	0	0.300436	0	0.243973	0.140235	0.856593	0.154537
Cow	CVS40_10611	KAI8117519.1	COW_DROME	1.56134	0.564779	0.084782	2.16465	1.18547	0.465931	0.973907	1.10051	0.563452
Lcp65Ab1	CVS40_0386	KAI8130084.1	LCP52_DROME	303.215	156.032	13.755	949.161	383.157	111.555	466.986	443.042	142.608
Tollo	CVS40_7003	KAI8122113.1	TOLL8_DROME	11.0718	8.66526	6.05525	17.5098	13.0754	12.2898	11.1305	11.3895	9.50486
sli	CVS40_11171	KAI8116844.1	SLIT_DROME	14.3963	10.2441	6.85547	21.6276	15.0308	11.9739	16.0321	15.1651	16.407
CVS40_6685	CVS40_6685	KAI8122553.1	CUG1A_TENMO	81.7366	34.326	6.26091	101.786	62.5226	18.7653	134.576	224.324	56.8868
CVS40_8500	CVS40_8500	KAI8120189.1	ATR_ASHGO	0.343823	0.239865	0	0	0	0	0	0	1.43576
CVS40_5541	CVS40_5541	KAI8123995.1	TRYP_SARBU	2795.03	2672	2068.75	3967.33	3372.27	2971.96	14769.7	21300.9	7677.78
CVS40_6686	CVS40_6686	KAI8122552.1	FP1V1_PERVI	291.898	132.996	13.4151	313.307	195.156	61.6706	220.816	419.127	122.358
CVS40_8893	CVS40_8893	KAI8119692.1	CUT4_CAEEL	0.534096	0.413994	0.783154	0.802923	0.561488	0.978035	0.824546	0.915707	0.867345
CA2	CVS40_0347	KAI8130363.1	CAH2_MOUSE	47.8903	38.7779	32.7575	67.235	43.4117	18.554	38.6611	39.9004	16.8949
CVS40_7021	CVS40_7021	KAI8122122.1	FOMT1_CHRAE	198.007	223.412	228.389	252.48	308.475	275.073	238.64	201.162	300.603
CVS40_8897	CVS40_8897	KAI8119649.1	Y436_SHEDO	0	0	0	0	0	0	0	0	0
Toll-7	CVS40_5489	KAI8123622.1	TOLL7_DROME	10.7285	11.4804	11.3228	14.3015	12.676	15.2995	12.3121	12.306	16.211
CVS40_9964	CVS40_9964	KAI8118420.1	VASO3_TABYA	6.98315	0	2.60051	21.7458	0	2.67929	14.841	9.23601	20.0576
foi	CVS40_6029	KAI8123281.1	FOI_DROME	4.5953	10.6647	7.78335	9.31587	13.1536	7.06518	8.19898	5.99087	3.41988
Pal2	CVS40_12819	KAI8114881.1	PAL2_DROME	15.4294	12.3186	7.91855	18.0925	13.1118	10.4541	15.4831	10.4492	5.01132
CVS40_6086	CVS40_6086	KAI8123186.1	Y2471_DICDI	60.5275	49.2067	45.0596	65.3976	60.7218	55.2379	71.6136	115.929	88.7466
Sema2a	CVS40_1772	KAI8128918.1	SEM2A_DROME	2.6324	1.08192	0.179535	3.31315	1.22281	1.07619	1.03102	1.82629	0.965756
CVS40_0965	CVS40_0965	KAI8129680.1	CUT1_CAEEL	2.99352	2.22755	3.07261	3.6452	2.51763	3.61794	2.14267	3.54134	6.94474
CVS40_6520	CVS40_6520	KAI8122650.1	APY_TABYA	58.8565	43.396	39.7932	84.5346	73.6248	70.0744	106.377	96.6198	40.7249
Hmcn2	CVS40_3330	KAI8126716.1	HMCN2_HUMAN	18.8648	15.2905	11.1082	20.4102	17.0214	13.0745	17.6368	19.7372	14.795
BMPR1B	CVS40_9755	KAI8118675.1	BMR1B_CHICK	99.0545	95.4122	90.3748	111.882	102.746	102.222	89.9923	99.4065	88.1408
Cont	CVS40_12493	KAI8115227.1	CONT_DROME	74.795	58.5673	53.4795	78.7019	62.6916	62.0363	65.7891	82.8028	58.6985
CVS40_5909	CVS40_5909	KAI8123457.1	PE48A_LUCCU	11100.5	12407.4	14922.1	12357.2	13012.7	16205.6	11217	10606	12190.1
ire-1	CVS40_4920	KAI8124708.1	IRE1_CAEEL	119.541	125.8	111.704	124.616	127.865	121.588	110.05	92.6384	79.389
hfw	CVS40_7323	KAI8121651.1	HFW1_DROPS	22.9209	21.0778	18.587	22.5541	20.879	19.1262	22.1526	18.3539	14.9252
Lrrc15	CVS40_0535	KAI8130499.1	LRC15_MOUSE	17.2472	16.0426	7.1459	9.89049	13.5688	10.1233	21.7372	17.0372	16.2168
CVS40_7405	CVS40_7405	KAI8121494.1	IDI2_STRMU	5.60585	6.5179	4.79497	5.05647	5.89336	4.61944	2.95037	3.60421	5.85233
CVS40_8331	CVS40_8331	KAI8120420.1	U184_DROME	6.93246	6.88736	5.81432	6.18007	6.18204	5.47305	7.3823	5.71623	3.59203
PDIA5	CVS40_7856	KAI8120954.1	PDIA5_HUMAN	39.6022	34.6835	30.4173	34.3294	31.3601	28.6311	42.2268	55.0238	39.2554
Glg1	CVS40_6766	KAI8122363.1	GSLG1_MOUSE	80.496	89.3241	69.6089	69.8146	75.2087	62.8087	71.5086	72.7966	55.0486
gpr180	CVS40_2004	KAI8128615.1	GP180_XENLA	0	0	1.34517	1.29293	0	0	0.917353	0	0
TM9SF3	CVS40_11426	KAI8116518.1	TM9S3_HUMAN	73.0278	74.2401	65.1852	61.7409	60.8662	59.4499	61.9846	69.8396	51.0738
LAMP1	CVS40_12555	KAI8115177.1	LAMP1_CHICK	436.745	434.79	377.369	384.595	365.834	317.762	425.462	416.321	379.3
Tm9sf2	CVS40_4134	KAI8125942.1	TM9S2_RAT	230.186	221.383	194.842	186.505	186.626	176.199	210.163	212.179	159.195
RPN2	CVS40_2702	KAI8127407.1	RPN2_PONAB	236.846	233.729	204.798	154.925	161.422	145.878	159.185	213.543	127.995
mth2	CVS40_3687	KAI8126109.1	MTH10_DROME	46.5208	47.2388	45.1673	41.8904	39.5239	40.96	40.571	34.6935	39.945
CVS40_0330	CVS40_0330	KAI8130823.1	CSPG2_HUMAN	17.311	17.6355	14.5048	14.9949	14.2991	12.5793	18.3952	13.5679	17.7215
CVS40_2864	CVS40_2864	KAI8127094.1	ALLP_ECOLI	6.87062	13.7401	12.2573	17.0425	12.2791	10.191	16.6337	12.5453	10.52
awd	CVS40_5064	KAI8124528.1	NDKA_DROME	3436.32	3431.33	2747.93	2741.72	2747.57	2359.57	2835.58	3080.39	1602.63
CVS40_4919	CVS40_4919	KAI8124610.1	VCP_APIME	289.919	268.763	203.134	234.891	198.704	181.673	226.203	221.925	180.821
Erp44	CVS40_6444	KAI8122851.1	ERP44_MOUSE	388.603	394.206	388.632	293.633	315.554	326.83	389.771	399.372	320.442
Ugt	CVS40_10792	KAI8117249.1	UGGG_DROME	236.177	230.186	192.911	182.312	174.264	161.19	185.016	219.807	144.632
ATP6AP2	CVS40_12516	KAI8115292.1	RENR_DROME	1052.5	1065.5	877.015	760.762	868.075	707.71	862.249	761.187	502.957
Timp	CVS40_0543	KAI8130033.1	TIMP_DROME	13.9613	16.7348	10.9745	11.165	11.9537	8.22328	10.787	9.47597	8.81523
Erlec1	CVS40_4760	KAI8125120.1	ERLEC_MOUSE	245.961	236.865	207.936	168.011	179.136	168.169	204.468	210.008	147.839
CVS40_4652	CVS40_4652	KAI8124893.1	TRYP_ASTAS	1177	1041.56	1194.18	755.521	763.926	1017.99	983.455	601.663	773.807
CVS40_8272	CVS40_8272	KAI8120439.1	P27K_GALME	156.156	146.243	159.123	100.581	113.411	128.933	172.87	151.628	152.837
CVS40_8906	CVS40_8906	KAI8119716.1	KPYM_FELCA	6.68007	4.08783	1.89028	5.39115	2.5873	1.28763	5.62516	3.43589	2.12068
LMAN1	CVS40_6028	KAI8123283.1	LMAN1_HUMAN	566.433	520.977	455.694	363.631	371.153	382.787	400.694	475.928	330.239
magt1	CVS40_9786	KAI8118560.1	MAGT1_DANRE	465.087	430.409	411.183	294.457	339.568	313.285	402.949	432.887	285.592
CVS40_8578	CVS40_8578	KAI8120124.1	CE126_MOUSE	284.611	341.098	331.129	191.442	224.405	269.053	250.42	251.489	265.239
CVS40_7586	CVS40_7586	KAI8121319.1	HEXC_BOMMO	448.261	505.904	508.28	342.447	310.07	388.128	675.066	632.345	911.578
Pdi	CVS40_8776	KAI8119884.1	PDI_DROME	6889.63	6337.26	5170.14	4203.81	4567.33	4192.83	4075.88	5753.79	3670.62
Ssr4	CVS40_3066	KAI8127260.1	SSRD_MOUSE	640.081	625.649	586.549	448.131	429.012	421.982	516.044	698.513	430.058
SSR2	CVS40_12174	KAI8115542.1	SSRB_CANLF	720.166	720.364	611.508	461.641	482.157	457.711	513.301	659.034	376.267
CVS40_4515	CVS40_4515	KAI8125638.1	VNNL1_DROME	2.2186	2.11163	1.31135	1.4427	1.573	0.831434	24.4175	6.10374	2.44182
Ost48	CVS40_2429	KAI8128266.1	OST48_DROME	306.3	284.688	257.56	193.397	190.605	188.763	225.292	280.188	162.617
CVS40_7747	CVS40_7747	KAI8121180.1	CU16A_LOCMI	766.345	789.071	918.619	516.306	562.422	601.292	532.519	883.538	671.387
UGT8	CVS40_1043	KAI8129257.1	UGT5_DACCO	157.926	154.316	114.879	98.3778	140.667	87.4361	156.897	96.957	74.7733
creld2	CVS40_10202	KAI8118007.1	CREL2_DANRE	58.1774	54.9166	48.5572	36.7998	39.1327	32.2311	45.4611	44.5049	29.6242
CVS40_12305	CVS40_12305	KAI8115676.1	COE2_DANRE	6.9512	7.32779	6.34209	4.17998	4.38462	5.0916	3.12185	5.24384	9.0307
SSR1	CVS40_7352	KAI8121670.1	SSRA_HUMAN	1148.8	1024.23	882.449	697.199	702.534	626.799	677.122	1042.97	510.606
CVS40_4516	CVS40_4516	KAI8125645.1	VNNL1_DROME	934.061	879.291	668.162	488.504	638.928	456.653	838.087	758.592	502.05
chid1	CVS40_10221	KAI8118032.1	CHID1_XENTR	86.0967	85.0691	65.6605	52.4274	48.2497	47.3594	74.4752	84.0875	53.4707
CVS40_6977	CVS40_6977	KAI8122160.1	PIRC1_DANRE	3105.57	3063.37	2308.41	2172.28	2037.55	1079.07	3230.73	4065.16	1452.18
Crc	CVS40_11839	KAI8116029.1	CALR_DROME	1805.64	1646.98	1626.95	1065.39	943.628	1036.57	1569.09	1787.19	1120.8
Cnpy4	CVS40_12441	KAI8115462.1	CNPY4_MOUSE	14.0354	10.9829	8.71128	7.0333	6.5579	6.03785	11.2562	11.6881	15.0919
ImpE2	CVS40_12982	KAI8114667.1	IMPE2_DROME	0.19566	0.363995	0	0.176475	0	0	0	0	0.181576
sel	CVS40_2677	KAI8127119.1	SEELE_DROME	107.728	104.282	79.5937	52.5397	62.3329	48.0178	96.3413	86.7656	62.7707
IMPI	CVS40_8273	KAI8120440.1	ALL6_APICE	130.02	94.0857	102.999	53.7921	49.1813	71.0034	107.536	82.1587	147.837
Plcxd1	CVS40_4763	KAI8125119.1	PLCX1_MOUSE	20.9773	16.7604	14.1966	9.21815	8.3406	7.28872	11.3235	15.6312	9.85793
CVS40_7778	CVS40_7778	KAI8121066.1	EGFLR_HOLDI	2.298	1.60313	0.842399	1.0364	0.301982	0	6.28909	2.36395	1.06624
ENDOG	CVS40_7702	KAI8121163.1	NUCG_HUMAN	32.1598	28.4328	28.0138	9.6215	11.7161	13.9939	14.2109	27.3506	24.6725
CVS40_2221	CVS40_2221	KAI8128344.1	MCM5_DROME	0	1.3992	1.10286	0.169618	0.790706	0.550921	0.633356	0.193421	0.523467
CVS40_5655	CVS40_5655	KAI8123876.1	VDP_BOMMO	19.5128	21.3385	17.0125	8.32458	6.37584	6.37379	220.714	52.0808	17.8626
Amy-d	CVS40_6603	KAI8122571.1	AMYA_DROMA	103.668	80.0878	91.9075	31.8018	24.5801	41.0482	417.004	163.655	179.889
CVS40_3166	CVS40_3166	KAI8127362.1	TSEP_GLOMM	3.15438	1.76044	1.64456	1.32778	0.221082	0.308069	0.354167	0.432655	0
CVS40_5660	CVS40_5660	KAI8123773.1	Y0031_DROME	11.0367	11.2209	7.77805	1.38909	3.50782	3.00807	306.481	71.5534	25.4853
CVS40_4548	CVS40_4548	KAI8125433.1	TSC1_MOUSE	1638.08	1217.26	1732.83	350.008	358.214	450.861	765.707	1721.07	1424.58
Mal-A3	CVS40_5572	KAI8123737.1	MAL3_DROME	10.7823	9.39102	2.77878	0	2.67925	0	15.7655	9.57924	8.18646
CVS40_4955	CVS40_4955	KAI8124576.1	UFD4_DROME	0.248184	0	0.24261	1521.98	484.498	125.976	18.3906	10.4672	6.909
CVS40_0068	CVS40_0068	KAI8130001.1	ASPP_AEDAE	0.359063	0.834962	0.351	1119.79	281.221	87.581	257.913	54.4817	15.6604
CVS40_5317	CVS40_5317	KAI8124240.1	UTP20_YEAST	0	0.927157	0.324797	191.956	79.1161	21.0517	34.9736	13.1591	14.9538
CVS40_8535	CVS40_8535	KAI8120144.1	PRP1_ARATH	0	0.526166	0	64.0348	14.5698	3.7291	35.0113	11.0563	6.03669
CVS40_8506	CVS40_8506	KAI8120185.1	DGKK_HUMAN	0	1.81471	0	120.017	38.5595	7.43106	27.929	22.0767	6.87971
CVS40_0850	CVS40_0850	KAI8130353.1	RESA_PLAFF	0	0	0.192195	0.177355	9.92144	2.8803	6.12588	2.22481	0.182441
CVS40_7903	CVS40_7903	KAI8120916.1	METK_LIMRJ	0	1.1847	0	16.6581	61.593	20.5244	68.6415	32.7552	13.0011
CVS40_2299	CVS40_2299	KAI8128119.1	DYHC2_PLAF7	0.0642781	0	0	0.289944	0.405519	2.21326	0.270674	0.132277	0
CVS40_2295	CVS40_2295	KAI8128082.1	OADG_SALPB	0.358111	0.832747	0.175026	0.161506	1.12943	43.0186	0.301558	0.368388	0
CVS40_7904	CVS40_7904	KAI8120915.1	#N/A	0	1.97761	0.51959	20.1363	101.699	31.5359	128.458	39.3682	17.2634
CVS40_7259	CVS40_7259	KAI8121885.1	NPIB4_HUMAN	23.8062	15.0576	1.55144	1135.5	247.602	71.1452	610.625	235.588	54.6395
CVS40_7999	CVS40_7999	KAI8120862.1	#N/A	0.168621	0.470526	0.109878	8.36517	21.9811	5.72263	32.4213	9.01983	2.24279
CVS40_8504	CVS40_8504	KAI8120227.1	SPT5H_CHICK	0.794163	0	0	16.8338	6.26169	0.290854	54.8375	26.9595	9.58047
CVS40_0849	CVS40_0849	KAI8130944.1	DCUP_CAMLR	0	0.0919406	0	0.0891446	1.76635	1.08591	10.2369	2.4401	1.00887
CVS40_8507	CVS40_8507	KAI8120186.1	IMSP6_RUDPH	17.9546	12.04	2.04086	533.495	122.471	29.6671	278.3	171.598	53.8588
CVS40_7902	CVS40_7902	KAI8120840.1	METK_LIMRJ	0.636829	8.88525	1.86758	78.6953	214.906	56.9085	267.595	101.541	31.9117
CVS40_8531	CVS40_8531	KAI8120235.1	RETIN_DROME	0.322265	0.119904	0	6.80197	2.10052	0.141634	2.98511	2.25429	0.418674
CVS40_2289	CVS40_2289	KAI8127747.1	RL4_METRJ	0.176701	0	0	0	0	1.81213	0	0	0
CVS40_8425	CVS40_8425	KAI8120272.1	CU01_LONON	0	3.24771	0	4.04922	37.2308	7.30716	14.2809	2.56556	3.24008
CVS40_7997	CVS40_7997	KAI8120872.1	ICEN_PSESY	0.0685163	0.0637195	0.0669686	0.247182	2.66482	1.15417	11.3649	2.32567	0.63574
CVS40_8503	CVS40_8503	KAI8120187.1	NFH_HUMAN	23.7718	10.2161	1.61783	375.915	80.0343	25.6777	238.693	186.965	58.6392
CVS40_8000	CVS40_8000	KAI8120858.1	ICEN_ENTAG	0	0	0	0	0	0	0	0	0
CVS40_6319	CVS40_6319	KAI8123167.1	#N/A	0	0.14016	0	1.49503	0.475218	0.110377	0.888183	0.310005	0
CVS40_5337	CVS40_5337	KAI8124300.1	EFTU_CAMHC	22.9085	53.6975	19.1096	1018.85	333.957	111.755	117.288	37.5485	107.993
CVS40_0643	CVS40_0643	KAI8130871.1	CASA2_CAMDR	2.4614	1.14474	0.240622	32.4701	9.63893	2.11843	17.0479	8.48232	1.99859
CVS40_5985	CVS40_5985	KAI8123504.1	SLA1_YEAS7	0.164241	0.91663	0	2.2222	10.5326	4.69187	28.0761	7.94095	3.04825
CVS40_0853	CVS40_0853	KAI8129951.1	PF23B_XENLA	0.495744	0.922239	0.726917	2.38485	17.6329	7.74661	8.83617	3.4848	1.15009
CVS40_9039	CVS40_9039	KAI8119578.1	#N/A	0	0	0.420082	0	0.112935	3.54116	0	0	0
CVS40_7905	CVS40_7905	KAI8120914.1	#N/A	5.1926	10.6259	1.3536	99.9193	176.869	65.1661	250.695	84.3977	25.3779
Klk1b11	CVS40_6850	KAI8122371.1	K1B11_MOUSE	0.251886	0	0	1.81756	0.794394	0	0	0	0
CVS40_0130	CVS40_0130	KAI8130356.1	LEO1_YEAST	0.554826	1.03215	0	9.00814	0.583281	0.812797	4.20488	1.71225	0
CVS40_8373	CVS40_8373	KAI8120297.1	HYPB_HYPLI	0.250332	0	0	0	0	1.10014	0	0.515014	0.92917
CVS40_6974	CVS40_6974	KAI8122159.1	BIGA_SALTY	0.88433	5.48377	2.0171	32.1724	66.6273	20.2963	32.5176	9.70356	4.3767
CVS40_11037	CVS40_11037	KAI8116982.1	CU18A_LOCMI	0	2.27291	0	2.75513	14.1289	4.0272	16.4615	5.02741	0.566892
CVS40_5281	CVS40_5281	KAI8124124.1	HMCT_BOMMO	0.0550673	0.102427	0	0.893956	0.231549	0	0.324556	0	0.255458
CVS40_0572	CVS40_0572	KAI8129957.1	XYLA_ARTS2	0	0	0.282	1.56124	1.51636	0	0.242933	0	0.535398
CVS40_8426	CVS40_8426	KAI8120275.1	#N/A	0.353423	7.88973	1.38195	25.503	66.1357	18.3801	43.1536	16.3605	3.9356
CVS40_12308	CVS40_12308	KAI8115490.1	XYNC_NEOPA	0.261294	0	0	0	1.09883	0	0	0	0
CVS40_2297	CVS40_2297	KAI8128112.1	RH2A_PLAF7	0	0.129101	0	1.00159	0.43776	0.305008	1.63635	0.428355	0
CVS40_8483	CVS40_8483	KAI8120220.1	HTF4_DANRE	61.8604	28.7699	7.63848	533.018	121.167	46.5039	241.814	364.733	111.788
CVS40_6320	CVS40_6320	KAI8122957.1	Y032_RICTY	0.117735	0.164284	0	1.22131	0.123788	0	2.28036	1.57454	0.491663
CVS40_0764	CVS40_0764	KAI8130694.1	YQGF_CARHZ	0.50376	0	0.492447	2.72634	5.82555	1.10698	3.81786	3.62752	1.40242
COL1A2	CVS40_2026	KAI8128641.1	CO1A2_RAT	0	0	0	0	0	0	0	0	0
CVS40_3961	CVS40_3961	KAI8125911.1	CSP_PLAVB	118.552	45.608	3.93958	797.91	204.424	72.5687	42.9863	29.7111	9.03784
CVS40_11036	CVS40_11036	KAI8116983.1	CUA2B_TENMO	0.946315	0.293407	0	1.42262	5.30586	0.693156	10.8906	2.59593	1.75631
Cpr47Eg	CVS40_9390	KAI8118968.1	LCP2A_DROME	1079.15	495.537	60.424	6713.01	2389.62	585.087	3263.67	3262.56	888.285
CVS40_9599	CVS40_9599	KAI8118848.1	ZMYM6_HUMAN	0.305447	0	0.298588	0	2.5689	1.3424	0.771634	0	0
CCAP	CVS40_4992	KAI8124690.1	CCAP_DROME	0	0.617598	0	2.39561	0.349012	0.243173	0.559119	1.70757	0.308073
CVS40_2195	CVS40_2195	KAI8128295.1	#N/A	2.67805	3.20272	1.9946	33.0131	7.90992	3.54959	34.2566	29.9104	12.4257
CVS40_2198	CVS40_2198	KAI8128304.1	GLH2_CAEEL	0	0	0.07173	0.330915	0	0.107481	0.679653	0.452877	0.136175
CVS40_7283	CVS40_7283	KAI8121721.1	SVMI1_CERCE	1.16052	1.07947	0.283616	8.63602	0.610021	0.212509	2.44314	1.19383	0.269236
CVS40_3218	CVS40_3218	KAI8126656.1	#N/A	0	0	0.0982822	0.36279	0	0	0.254024	0.10344	0.186621
CVS40_11035	CVS40_11035	KAI8116984.1	CU18A_LOCMI	0.916342	1.9888	0.298588	4.68372	14.1289	4.0272	21.6058	6.28426	1.98412
CVS40_8427	CVS40_8427	KAI8120274.1	NOPX_SINFN	2.31002	27.2166	4.76719	51.1647	148.947	34.9688	105.474	35.6447	10.7181
CVS40_5279	CVS40_5279	KAI8124258.1	GATC_HELPJ	0	0.294324	0	0	0.997957	0.231781	0	0	0
CVS40_2899	CVS40_2899	KAI8127518.1	SPZ2_DROME	0	0.226686	0	0.549534	0.2562	0.981762	0	0	0
CVS40_0859	CVS40_0859	KAI8130352.1	KDIS_RAT	0.557499	0.388921	0.681225	0.502863	6.74004	3.06267	5.86824	2.00724	0.776014
CVS40_9036	CVS40_9036	KAI8119577.1	HEPA_HCMVA	4.78572	1.64001	0	32.7161	23.0374	8.85584	30.755	12.6963	2.57111
CVS40_0470	CVS40_0470	KAI8130862.1	SACB_PSESH	0	0	0.207936	0	0	0.623258	0	0	0.197402
CVS40_4063	CVS40_4063	KAI8125799.1	SYDND_DESOH	0.0825868	0.0768129	0	0.521474	0.0868271	0.0605032	0.486834	0.25487	0.0766488
CVS40_6980	CVS40_6980	KAI8122227.1	LAMA1_HUMAN	0	10.782	2.444	24.6013	53.762	13.818	11.2922	5.14379	2.9528
CVS40_7907	CVS40_7907	KAI8120912.1	GTR2_LEIDO	3.78526	15.844	2.46684	60.8883	105.454	37.4304	109.437	41.5349	14.0504
CVS40_6322	CVS40_6322	KAI8122959.1	MS300_DROME	6.72432	2.0364	0.764339	34.4172	15.1248	3.77998	30.2874	30.2431	6.96555
CVS40_5036	CVS40_5036	KAI8124390.1	TX11A_CORWE	0.117594	0	0	0.318232	0.247279	0	0.198071	0	0
CVS40_5432	CVS40_5432	KAI8124171.1	C11BB_BACTV	1.11357	0.295943	0	5.59618	2.67585	1.39829	10.3149	4.25484	0.885741
CVS40_0217	CVS40_0217	KAI8130674.1	BUB1_CAEEL	0	0.187434	0.0984782	0.181758	1.05919	0.516591	0.254524	0.103653	0.186995
CVS40_8002	CVS40_8002	KAI8120911.1	AKAP8_RAT	0	0.473285	0	0	1.06984	0	1.28541	0	0.472173
CVS40_7948	CVS40_7948	KAI8120816.1	YPF16_PLAF7	0	0.330469	0	0.961395	0	0.520475	0.598355	0	0.659385
CVS40_6430	CVS40_6430	KAI8122698.1	ZAN_MOUSE	0.574501	21.375	5.0544	69.6977	112.035	35.348	37.0089	16.5477	8.52991
CVS40_11312	CVS40_11312	KAI8116630.1	SBNO1_RAT	0	0.14546	0	0.282108	0	0.343634	0	0.160869	0
CVS40_8480	CVS40_8480	KAI8120224.1	CUT5_CAEEL	0	0	0	0	0	0	0	0	0
Mip	CVS40_3891	KAI8126486.1	MIP_DROME	2.02511	1.25578	0	9.74213	3.54829	1.23613	2.27375	1.38882	1.87925
CVS40_12310	CVS40_12310	KAI8115526.1	6P21_YEAST	0	0	0.106881	0.0986434	0.344866	0.0801025	0.276234	0	0.304414
CVS40_10116	CVS40_10116	KAI8118115.1	CU08_LOCMI	18.8383	7.88515	0.306921	66.8356	13.8631	4.59955	61.6027	28.4224	9.03204
CVS40_0342	CVS40_0342	KAI8130371.1	MPCA_MORAP	0	0	0.122734	0	0	0	0	0	0
CVS40_6576	CVS40_6576	KAI8122515.1	COGS_LEPPG	0.485639	1.1293	0.7121	7.00873	2.55273	1.42288	1.84026	0.999153	1.35198
Cp16	CVS40_3664	KAI8126050.1	CH16_DROME	0	0	0.262553	0	0.564715	0	0	0	0
CVS40_7174	CVS40_7174	KAI8121781.1	TPO2_YEAST	0.798547	0.297109	0	2.30492	0.167886	0.233967	0.941418	0.821464	0.444617
CVS40_0649	CVS40_0649	KAI8130877.1	ATPD_TOBAC	0	0	0.193707	0.536199	0	0.290285	0	0.203835	0
CVS40_7753	CVS40_7753	KAI8121268.1	CLRC_IDEDE	0	0	0.527904	1.46132	0.567727	0	0.45475	0.555529	0
CVS40_11313	CVS40_11313	KAI8116676.1	DRE2B_ORYSJ	0	0.238891	0	0.463323	0	0	0.10814	0	0.238335
wntD	CVS40_6214	KAI8123272.1	WNT8_DROME	0	0.188551	0	0.182852	0.426221	0	0	0	0.18812
a5	CVS40_8699	KAI8119946.1	OBA5_DROME	0.639847	0	0	1.15428	0	0	1.61641	0.329105	0.296879
CVS40_10250	CVS40_10250	KAI8117999.1	MURE_RICCN	0	0.447429	0.705334	2.82024	0.505695	0.352341	0.202542	0.742245	0.446377
Col6a4	CVS40_3618	KAI8126280.1	CO6A4_MOUSE	359.258	220.638	97.0102	1684.58	537.521	244.074	1325.52	1025.11	340.743
CVS40_4545	CVS40_4545	KAI8125428.1	DIH44_CAMFO	0.761321	0	0	0.68671	1.60073	0	0.641095	1.56634	0
CVS40_8867	CVS40_8867	KAI8119610.1	SRX1A_SARPE	1.58833	0	1.55266	7.87967	3.33957	0	1.3375	4.90173	3.6848
CVS40_9686	CVS40_9686	KAI8118791.1	PUR4_PHOLL	1.00006	0.465105	0	3.15717	1.05135	0	1.68426	1.02876	0.464012
CVS40_5473	CVS40_5473	KAI8123758.1	SRX2A_SARPE	12.5307	13.1594	1.97569	61.6175	14.0232	7.25393	5.95668	4.98978	1.5004
CVS40_11061	CVS40_11061	KAI8116959.1	CP6D3_MUSDO	0	0.348506	0.18312	1.01387	0	0	0.157739	0	0
Obp99b	CVS40_6242	KAI8123031.1	OB99B_DROME	0.21216	0	0	0.382745	0	0.310813	0	0.545635	0.0984414
CVS40_0035	CVS40_0035	KAI8130512.1	PA1_VESMG	0.955994	0.444612	0.311509	4.16781	1.17253	0.816953	4.42764	3.60591	1.03499
CVS40_7260	CVS40_7260	KAI8121755.1	MUC1_MESAU	153.963	72.298	6.61498	486.621	123.222	38.3344	602.923	526.364	144.314
CVS40_3279	CVS40_3279	KAI8126584.1	SPT5_GIBZE	0.563053	0.349152	0	1.8622	1.18386	0	2.21264	1.54457	0.522497
Ilp3	CVS40_8014	KAI8120684.1	INSL3_DROME	0.42634	0	0	0	0	0.62457	0	0	0
CVS40_2306	CVS40_2306	KAI8128193.1	SPB4_ASPTN	0.0949056	0	0	0	0	0.139017	0.0798991	0	0
CVS40_0384	CVS40_0384	KAI8130082.1	PI16_BOVIN	0.0576667	0	0.0563813	0.260123	0.0606303	0.0422588	0.097138	0	0
CVS40_12211	CVS40_12211	KAI8115620.1	CATL_SARPE	131.412	68.7184	6.23131	498.459	218.74	73.6289	345.88	247.331	76.5956
CVS40_5429	CVS40_5429	KAI8124321.1	DDR48_CANAL	75.2831	30.811	4.17024	224.313	59.0942	19.8516	162.501	97.0627	31.4372
CVS40_3726	CVS40_3726	KAI8126183.1	EYA1_HUMAN	0.618356	0.690201	0.241798	3.45808	1.36514	0.452932	2.70767	0.954153	0.344289
CVS40_7936	CVS40_7936	KAI8120847.1	LCP52_DROME	13.6054	3.8939	1.5346	42.0082	20.9047	2.68307	20.7105	20.9938	9.22628
CVS40_3676	CVS40_3676	KAI8126303.1	TMC5_RAT	0.651162	0.201903	0.84872	3.13252	0.456372	0.15899	1.27944	3.79582	0.604259
CVS40_9049	CVS40_9049	KAI8119783.1	CUA2B_TENMO	23.9009	40.858	6.63037	182.956	105.26	31.7017	299.721	139.214	41.0617
CVS40_10452	CVS40_10452	KAI8117741.1	MUTS_TREPA	0	0.133599	0	0.259109	0.150996	0	0.241874	0.147745	0
CVS40_9381	CVS40_9381	KAI8119176.1	CUD2_SCHGR	0	0.133885	0	0.259643	0.151323	0	0.363606	0.29613	0
Lcp65Ag1	CVS40_3533	KAI8126468.1	LCP82_DROME	143.11	70.6179	9.12006	618.559	287.673	89.904	450.185	291.617	101.19
CVS40_2115	CVS40_2115	KAI8127941.1	ATG15_ASPTN	103.464	64.414	18.662	386.331	138.285	48.8602	250.974	198.003	63.29
drpr	CVS40_7785	KAI8120999.1	DRPR_DROME	0.442165	0	0.144076	0.398832	0.154951	0.107948	0	0.379045	0.410316
CVS40_2607	CVS40_2607	KAI8127184.1	CLPB_BDEBA	0.0207357	0	0	0.0374082	0.021799	0	0	0	0.0192415
CVS40_2603	CVS40_2603	KAI8127188.1	GATA_OCEIH	0.117876	0	0	0.212656	0.123907	0	0	0.121253	0
CVS40_10052	CVS40_10052	KAI8118298.1	P320_TRYBB	1.12694	0.62894	0	1.8297	4.14658	1.65092	15.5632	6.1442	1.46408
CVS40_10133	CVS40_10133	KAI8118112.1	TIG_CORGL	0.808869	0.718176	0.32347	3.81381	0	0.673272	0.49537	0	1.19415
CVS40_12752	CVS40_12752	KAI8114945.1	ATPF_POLAQ	0	0	0.231547	0	0	0.346983	0	0	0
CVS40_4113	CVS40_4113	KAI8125978.1	ACRB_ASPCL	0	0.126837	0	0.123004	0.286738	0.0998887	0	0.140285	0.253094
CVS40_3973	CVS40_3973	KAI8125742.1	#N/A	0	0.61558	0	0.596944	1.39149	0.484756	3.34375	0.680795	0.614133
CVS40_6247	CVS40_6247	KAI8123034.1	1433_TRIHA	0.421899	0	0.412425	0	1.33061	0.927096	0.710547	0	1.17453
CVS40_7290	CVS40_7290	KAI8121661.1	#N/A	39.7985	31.3758	24.79	191.421	67.2241	33.5954	155.92	118.453	52.6955
Edg78E	CVS40_1692	KAI8128833.1	CUP7_DROME	0.535745	0	0	0	0	0	0	0	0
CVS40_1531	CVS40_1531	KAI8129381.1	THO2_YEAST	3.56135	2.10803	0.474733	12.1193	3.744	3.5572	5.58895	3.49703	3.60527
CVS40_0861	CVS40_0861	KAI8130886.1	OPA1_DANRE	0	0.218778	0	0.848618	0.494535	0.516848	0.198071	0.241959	0.218272
LCP-14	CVS40_2212	KAI8128051.1	CU14_MANSE	3.61628	4.0845	0.50501	15.1444	5.70261	2.27044	11.7458	7.44012	2.6367
let-653	CVS40_3099	KAI8127682.1	LE653_CAEEL	0.318192	0.131536	0	0.765356	0.297353	0.0517898	0.774059	0.763755	0.16405
CVS40_7242	CVS40_7242	KAI8121759.1	ACH1_DROME	0.344246	0.0883306	0	0.770919	0.336942	0.069567	0.399839	0.488449	0.0881216
Grik1	CVS40_11585	KAI8116308.1	GRIK1_RAT	0.205605	0	0.20099	0.55634	0	0	0	0	0
l(3)mbn	CVS40_3540	KAI8126173.1	MBN_DROME	13.2135	5.96719	0.935999	37.7421	17.4143	5.04972	24.592	26.496	7.28597
oig-4	CVS40_3457	KAI8126582.1	OIG4_CAEEL	2.32772	0.787325	0	4.00832	4.44927	0.465001	1.06916	1.3061	1.76732
CVS40_3807	CVS40_3807	KAI8126265.1	ZAN_MOUSE	0.144746	0.13463	0.424511	1.69739	0.456535	1.0603	1.95032	1.19127	0.671639
CVS40_8522	CVS40_8522	KAI8120178.1	CU16A_LOCMI	0.824894	0	0	1.11608	0.2168	0	1.38926	0.424284	0
LCP2	CVS40_5565	KAI8123635.1	LCP2_DROME	0.0975615	0	0.286075	0	0	0	47.2329	14.8516	2.62515
CVS40_12296	CVS40_12296	KAI8115529.1	RL11_BRUO2	0	0	0.764339	1.41054	0	0.572723	0	0	0
Adam11	CVS40_2242	KAI8127720.1	UNC71_CAEEL	0.650378	0.189038	0.0397442	1.50326	0.5128	0.297743	0.855736	0.752674	0.226314
Cp1	CVS40_8642	KAI8119989.1	CATL_DROME	0.330721	0	0.215526	0.696056	0	0	1.94946	0.226795	0.102304
CVS40_8528	CVS40_8528	KAI8120183.1	FOLD2_STRAW	3.42934	2.85405	1.41151	13.7406	5.00935	2.74989	5.86676	4.38185	2.27787
CVS40_7381	CVS40_7381	KAI8121477.1	NUP88_RAT	0	0	0.50181	0.694544	0	0	0	0.528069	0
CVS40_8429	CVS40_8429	KAI8120290.1	#N/A	124.145	243.939	26.5469	683.769	298.546	90.9336	1020.57	592.245	185.045
CVS40_11928	CVS40_11928	KAI8115928.1	KUN2_TABYA	0	0.675152	0	0	0.763073	0	0	0.746679	0
CVS40_7906	CVS40_7906	KAI8120913.1	METK_BACP2	391.005	504.347	79.8853	1387.61	366.535	129.766	2817.15	1418.68	402.696
EbpIII	CVS40_2760	KAI8127376.1	THAP1_THAPI	1.66334	2.51414	0.406497	3.1882	1.42077	0.761475	1.57575	1.39025	0.964706
CVS40_1562	CVS40_1562	KAI8129867.1	IR21A_ANOGA	0.753631	0.901279	0.420976	2.91332	0.565916	0.394299	1.3599	0.886011	1.09897
CVS40_0344	CVS40_0344	KAI8130360.1	CUO6_BLACR	1.15325	1.07271	0.225469	5.82531	3.87968	0.844735	7.38062	5.45722	0.214034
C1qa	CVS40_9085	KAI8119668.1	C1QA_MOUSE	5.06279	5.75567	2.1996	16.2369	17.1501	2.47226	9.94765	6.94411	2.08805
CVS40_3512	CVS40_3512	KAI8126477.1	CUA1A_TENMO	1.43256	0.242272	0.254626	2.46686	1.77985	0.0954035	1.645	1.20573	1.45022
CVS40_2205	CVS40_2205	KAI8128359.1	TRF_SARPE	0	0	0.208832	0.385369	0.449151	0.156467	0.179891	0.439501	0
CVS40_10965	CVS40_10965	KAI8117102.1	HELI_HHV7J	0.583607	0.180959	0	0.350941	0	0.854959	1.96578	1.40083	0.180509
fmrf	CVS40_10639	KAI8117449.1	FMRF_MUSDO	1.44239	1.07332	0	4.1633	2.27455	0.633912	3.88675	2.37405	1.47234
CVS40_11463	CVS40_11463	KAI8116477.1	EXOG_MOUSE	13.5621	11.7596	12.7332	48.7936	74.5906	89.5176	347.966	174.667	114.049
CVS40_7789	CVS40_7789	KAI8121006.1	Z512B_HUMAN	0	0	0	0.703911	0.273476	0	0.219046	0	0
resilin	CVS40_4583	KAI8125030.1	RESIL_DROME	0	0	0	0	0	0	0	0	0
CVS40_11937	CVS40_11937	KAI8115918.1	VAGO_DROME	34.5317	20.7225	6.0979	86.4092	32.3211	10.9334	35.6446	31.1683	13.6447
CVS40_5555	CVS40_5555	KAI8123765.1	ELYS_HALKA	0	0.475675	0	0	0.53762	0.374584	0.861269	0.526069	0
Grik4	CVS40_11439	KAI8116493.1	GRIK2_XENLA	0	0.245796	0	0.476725	0.277817	0.129042	0	0.0906204	0.245224
NID1	CVS40_3083	KAI8127279.1	NDG_DROME	35.3198	27.0715	10.3457	118.039	55.3657	24.1791	88.3777	50.3743	16.7971
CVS40_10083	CVS40_10083	KAI8118197.1	NEL_CHICK	0.71271	0.568227	0.149286	1.88267	1.44501	0.223745	0.728766	1.30922	0.425169
CVS40_3101	CVS40_3101	KAI8127336.1	TXG1A_SCOAL	0.541475	0	0	0	0.569245	0.396619	0.911931	0	1.00494
Gyc32E	CVS40_3918	KAI8125731.1	GCY3E_DROME	0.132597	0.041114	0.0432173	0.239204	0	0.0323774	0.148884	0.18185	0.12303
CVS40_7911	CVS40_7911	KAI8120932.1	NPRL3_MOUSE	0.120843	0.112397	0.118112	0.435955	0	0.265517	0.813991	0.497192	0.112134
Dms	CVS40_1495	KAI8129307.1	NEMS_DROME	0.546836	1.52593	0	2.13739	1.91627	0	1.84192	2.43763	0.845746
CVS40_2300	CVS40_2300	KAI8128191.1	DYHC2_PLAF7	0.210578	0.130591	0	0.569839	0.221379	0.205664	0.472877	0.288822	0
CVS40_5597	CVS40_5597	KAI8123959.1	CU01_ANOGA	0.153081	0	0.448898	0	0.804601	0.336361	0.128909	0.314926	0.284082
CVS40_0765	CVS40_0765	KAI8130695.1	SRB8_CANGB	1.22983	2.66917	0	4.80697	4.74063	0.900822	8.97532	1.68683	1.52166
CVS40_9901	CVS40_9901	KAI8118428.1	CYTA_SARPE	31.7497	18.7569	1.25824	79.3354	39.6927	12.8851	31.7939	49.874	19.9073
CVS40_5474	CVS40_5474	KAI8123750.1	SRX2A_SARPE	11.8255	5.08729	1.87849	23.7331	7.30378	3.03167	2.98741	6.69068	1.9204
l(2)34Fc	CVS40_5882	KAI8123572.1	DFP_DROME	0	0.568227	1.19435	0.826538	0	1.78987	0.257201	0.314213	0.566892
CVS40_8428	CVS40_8428	KAI8120291.1	COBD_PHOLL	106.722	254.223	34.6055	630.64	343.154	112.872	903.07	440.746	136.233
Cp36	CVS40_2422	KAI8128276.1	CH36_DROVI	0	0.113601	0	0.11017	0	0	0	0	0
CVS40_8488	CVS40_8488	KAI8120215.1	FHAB_BORPE	0	0.248833	0	0.241312	0	0	0	0	0.248251
CVS40_1532	CVS40_1532	KAI8129382.1	RL15_METFK	0	0.858166	0	0.832187	0	0	2.33072	0.474541	0
CVS40_9398	CVS40_9398	KAI8118976.1	CUD2_SCHGR	3.44787	1.41488	0.495653	7.77492	3.83791	1.18847	5.29441	2.71227	1.22335
CVS40_2370	CVS40_2370	KAI8127996.1	PA23_HELSU	0.626583	0	0	0	0	0	0	0	0
CVS40_1589	CVS40_1589	KAI8128737.1	TX11A_CORWE	2.27785	1.5134	0.318099	5.08762	1.71048	0.556158	8.31191	3.45904	1.81181
CVS40_8524	CVS40_8524	KAI8120179.1	IF2_CHLL3	0.161614	0	0	0.145791	0	0	5.44393	1.6626	0.449939
CVS40_2906	CVS40_2906	KAI8127300.1	RMXL3_HUMAN	0.19015	0	0	0.171512	0	0	0	0	0
CVS40_11402	CVS40_11402	KAI8116542.1	CHI10_DROME	3.34177	2.4867	7.84015	19.8942	25.2947	8.56723	8.72354	6.87536	0.93032
CVS40_9385	CVS40_9385	KAI8119193.1	CUD9_SCHGR	0.200124	0.372268	0	0.360998	0.631119	0	0	0	0
CVS40_1871	CVS40_1871	KAI8128826.1	SSP_BOMIG	0.567259	1.05528	2.21808	0	0	3.32404	0	0.583539	0
CVS40_7606	CVS40_7606	KAI8121303.1	PHUZ_BP201	0	0	0.168612	0.155583	0.181356	0	0	0.532342	0
CVS40_3471	CVS40_3471	KAI8126817.1	VG13_ICHVA	0.164524	0	0	0.148379	0	0.120492	0.969714	0	0
Obp99a	CVS40_1919	KAI8128971.1	OB99A_DROME	107.916	41.2986	4.46082	241.18	121.23	30.8957	149.345	176.352	51.9597
CVS40_8126	CVS40_8126	KAI8120603.1	SDNO_SORAA	14.3543	6.49543	5.30938	31.494	28.9573	6.53585	20.908	34.3215	21.9605
CVS40_10743	CVS40_10743	KAI8117334.1	OBP67_ANOGA	16.294	7.69828	3.28676	36.1597	15.7702	6.44113	6.31597	7.71568	4.32011
CVS40_5415	CVS40_5415	KAI8124184.1	CLU_MALGO	11.2676	5.09867	21.7314	61.2546	34.5758	11.8222	9.74464	29.7605	21.1945
CVS40_8518	CVS40_8518	KAI8120145.1	CXA5_CHICK	18.468	133.871	32.3714	273.997	309.304	117.549	787.232	396.993	130.011
CVS40_6078	CVS40_6078	KAI8123027.1	CU08_LOCMI	73.1029	39.1699	3.58463	145.748	63.7946	19.9282	178.002	76.7827	17.7826
NPTX2	CVS40_4488	KAI8125540.1	NPTX2_CAVPO	0.610894	0.568227	0.199057	1.4694	1.39149	0.223745	2.14343	0.628426	0.283448
CVS40_4607	CVS40_4607	KAI8124848.1	DGKK_HUMAN	0	0.271811	0	0	0	0.21405	0.246081	0	0.271168
CVS40_12377	CVS40_12377	KAI8115427.1	Y801_METJA	0	0.546785	0	0	0	0.430582	0.247493	0	0
sodE	CVS40_1143	KAI8129749.1	SODC5_DICDI	0	0.202332	0.212641	0.392406	0	0	0	0.447526	0
CVS40_2605	CVS40_2605	KAI8127186.1	IF2_MYCLE	0.162659	0	0	0.234748	0.136812	0.047655	0.0821937	0.13386	0.0603908
CVS40_8133	CVS40_8133	KAI8120606.1	AGO13_ORYSJ	4.01374	1.697	0.713383	7.5699	2.68519	1.06908	11.0615	10.51	1.35441
CVS40_1212	CVS40_1212	KAI8129578.1	PA1_VESVE	0.187071	0	0.274316	0	0.295004	0.479606	0.551371	0.577339	0.781211
Nlgn3	CVS40_1091	KAI8129634.1	NLGN3_MOUSE	0.898116	0.911333	0.372463	3.24039	1.65946	0.797395	1.60424	1.73579	0.631382
CVS40_5298	CVS40_5298	KAI8124283.1	CHD2_HUMAN	0.156245	0	0	0	0	0.114466	0	0	0
CVS40_4349	CVS40_4349	KAI8125326.1	INO80_PHANO	0	0	0	0	0	0	0	0	0
CVS40_8850	CVS40_8850	KAI8119818.1	YIDC_CAUVC	0.306836	0	0	0	0	0.22475	55.5518	23.3575	5.69469
CVS40_2101	CVS40_2101	KAI8127839.1	#N/A	1.33314	0.701903	0.0737746	2.67724	1.74528	0.423763	1.35561	2.19941	0.513519
CVS40_2380	CVS40_2380	KAI8128314.1	PDXJ_AGRFC	1.3441	0.625113	0.437973	0.404126	2.59057	0.820439	3.20689	1.38268	0.623644
CVS40_10758	CVS40_10758	KAI8117320.1	CU19_LOCMI	0.605114	0	0	0.545812	0.424099	0	14.0977	5.39483	0.93588
CVS40_9998	CVS40_9998	KAI8118273.1	PTN_RAT	3.36979	1.80833	1.77376	8.53411	3.33823	1.23415	3.43791	6.53302	3.1872
MCFD2	CVS40_6183	KAI8123106.1	MCFD2_PONAB	0.764719	0.12933	0.271823	0.877895	1.46171	0.203679	0.81958	0.85818	0.451587
CVS40_3244	CVS40_3244	KAI8126801.1	UMUC_SALTY	0.411609	0.191416	0	0.185627	0.649078	0.602989	0.346608	0	0
CVS40_10244	CVS40_10244	KAI8118041.1	ASTE1_DANRE	0.339215	0.631047	0.331598	0	1.06984	0	0.285648	0	0.944345
Pdia4	CVS40_2697	KAI8127081.1	PDIA4_RAT	135.415	78.4844	33.736	349.413	177.054	67.1236	174.104	115.982	52.1436
CVS40_4493	CVS40_4493	KAI8125314.1	CUD2_SCHGR	99.2195	44.5952	5.24767	162.295	57.0192	19.2538	327.345	211.18	55.3124
CVS40_12917	CVS40_12917	KAI8114746.1	FIS_SHEHH	0	0.850801	0.894146	4.12523	4.03871	5.09191	4.00525	5.83381	6.45089
CVS40_12044	CVS40_12044	KAI8115801.1	FRPD1_HUMAN	0.300909	0.27989	0.294151	0.814257	0.632682	0	0	0	0
CVS40_3016	CVS40_3016	KAI8127572.1	IF2_DESVH	2.31883	0.513543	0.647646	4.18317	1.74126	0.727927	3.44038	3.74846	1.94687
CVS40_3531	CVS40_3531	KAI8126470.1	YPF17_PLAF7	0.536454	0.498986	0	1.2097	0.84595	0.19646	0.903476	0.827775	0
CVS40_6911	CVS40_6911	KAI8122148.1	PA2_APIDO	2.13813	3.69348	1.19435	7.16333	1.92667	0.671201	2.05769	0.314213	1.70068
CVS40_8863	CVS40_8863	KAI8119614.1	MPT5_YEAST	0.361628	1.00911	1.41403	0	0	2.11908	0	0.372006	0.33558
Gabra6	CVS40_2238	KAI8128027.1	GBRA6_MOUSE	0	0	0.166203	0.0766841	0.178769	0	0	0.174907	0.0788972
CVS40_7070	CVS40_7070	KAI8121960.1	IF2_CAMC5	2.57157	0.896988	0.314228	4.92905	2.70346	0.941812	5.68437	3.96806	1.19317
CVS40_8490	CVS40_8490	KAI8120148.1	MAP1B_HUMAN	1.61272	1.17864	0.45043	5.19525	3.26976	1.60317	3.97712	8.88751	3.84829
CVS40_10865	CVS40_10865	KAI8117248.1	VASOT_HYBBI	2.23241	1.63153	0.311754	5.89706	3.01744	1.86879	1.61132	2.13244	1.47972
CVS40_8848	CVS40_8848	KAI8119653.1	110KD_PLAKN	0	0	0.264653	0.244194	0	0.198306	1.3679	0	0.251249
CVS40_12456	CVS40_12456	KAI8115412.1	LEDL2_DROME	2.87477	2.67399	0.936737	6.62665	2.0148	0.93587	2.42079	2.95727	0.296411
CVS40_9055	CVS40_9055	KAI8119566.1	CUA2B_TENMO	9.67412	3.59938	1.26092	17.4521	9.26624	2.67697	23.534	29.6341	7.18183
CVS40_9918	CVS40_9918	KAI8118354.1	PORB_ORYSJ	2.33308	1.51909	0	3.57754	0.735821	0.51268	0	0.480008	0.866012
CVS40_11622	CVS40_11622	KAI8116280.1	#N/A	0.0516485	0.0480475	0.353507	0.139787	0.271543	0.529769	0.348023	0.744012	0.143814
Con	CVS40_10055	KAI8118305.1	CONN_DROME	0.646104	0.627107	0.10985	1.29226	0.94503	0.0822984	0.922557	0.635749	0.286763
CVS40_0129	CVS40_0129	KAI8130964.1	FB213_ARATH	4.21899	3.32058	0.951749	9.80653	5.45891	1.18858	5.87567	5.50855	5.27032
insr	CVS40_1489	KAI8129375.1	INSR_XENLA	3.11556	1.03039	0.676799	4.74617	2.76585	0.202861	3.96449	2.06543	0.642478
CVS40_10458	CVS40_10458	KAI8117734.1	CSCL1_PONAB	1.22734	0.57081	0.59989	2.76765	1.29029	0.449501	1.03352	0	1.13894
CVS40_12809	CVS40_12809	KAI8114902.1	RPOP_NEUIN	0	0	0	0.232987	0	0	0	0	0
CVS40_12757	CVS40_12757	KAI8114940.1	AGM1_ORYSJ	0.260644	0.242415	0	0	0	0	0	0	0
CVS40_12724	CVS40_12724	KAI8114963.1	#N/A	0	0	0	0	0	0	0	0	0
CVS40_12525	CVS40_12525	KAI8115323.1	CO4A1_CAEEL	0.0646737	0	0	0	0	0	0.108935	0.133068	0.0600161
CVS40_12357	CVS40_12357	KAI8115328.1	#N/A	0	0	0	0	0	0	0	0	0
CVS40_12356	CVS40_12356	KAI8115330.1	#N/A	0	0	0	0	0	0	0	0	0
CVS40_12355	CVS40_12355	KAI8115331.1	#N/A	0	0	0	0	0	0	0	0	0
CVS40_12354	CVS40_12354	KAI8115333.1	COL90_CAEEL	0	0	0	0.278029	0	0.451554	0	0.317083	0
CVS40_12358	CVS40_12358	KAI8115335.1	#N/A	0	0	0	0	0	0	0	0	0
CVS40_12359	CVS40_12359	KAI8115405.1	PUX2_ARATH	0	0	2.04086	0	0	0	0	1.07383	0.968684
Obp19a	CVS40_12348	KAI8115413.1	OB19A_DROME	0	0	0	0	0	0.820666	0.471732	0	0
CVS40_12349	CVS40_12349	KAI8115414.1	OB19D_DROME	0	0	0	0	0	0	0	0	0
CVS40_12353	CVS40_12353	KAI8115415.1	CO7A1_MOUSE	0	0	0	0	0	0	0	0	0
CVS40_12350	CVS40_12350	KAI8115416.1	OB28A_DROME	0	0	0	0.253693	0	0	0	0	0
CVS40_12363	CVS40_12363	KAI8115445.1	#N/A	0	0	0	0	0	0	0	0	0
CVS40_12360	CVS40_12360	KAI8115460.1	#N/A	0	0	0	0	0	0	0	0	0
CVS40_12235	CVS40_12235	KAI8115511.1	RECB_BUCAP	0	0	0	0	0	0	0	0	0
CVS40_12195	CVS40_12195	KAI8115694.1	FER1_HALMA	0	0	0	0	0	0	0	0	0
CVS40_12313	CVS40_12313	KAI8115713.1	RISB_PSYIN	0	0	0	0	0	0	0	0	0
CVS40_11908	CVS40_11908	KAI8115949.1	PGK_STRU0	0	0	0	0	0	0	0	0	0
CVS40_11759	CVS40_11759	KAI8116115.1	IGS10_RAT	0	0	0	0	0	0	0	0	0
CVS40_11649	CVS40_11649	KAI8116245.1	LORF2_HUMAN	0	0	0	0	0	0	0	0	0
Pburs	CVS40_11565	KAI8116354.1	PBURS_DROME	0	0	0	0.299942	0	0.243572	0	0.342074	0
CVS40_11475	CVS40_11475	KAI8116458.1	QUEF_XANOR	0	0	0	0	0	0	0	0	0
CVS40_11275	CVS40_11275	KAI8116719.1	S52AA_CAEEL	0	0	0	0	0	0.307113	0	0	0
CVS40_11223	CVS40_11223	KAI8116782.1	ILVC_ACET2	0	0	0	0	0	0	0	0.530085	0
CVS40_11047	CVS40_11047	KAI8116972.1	PCE_TACTR	0	0	0	0.119909	0	0	0	0	0
CVS40_11008	CVS40_11008	KAI8117027.1	STRH_STRPN	0	0	0	0	0	0	0.268144	0	0
CVS40_11005	CVS40_11005	KAI8117044.1	PK1L3_MOUSE	0	0	0	0.24953	0	0	0	0	0
CVS40_11006	CVS40_11006	KAI8117045.1	ZAN_HUMAN	0	0	0	0.551026	0	0	0	0	0
CVS40_11007	CVS40_11007	KAI8117046.1	ZAN_HUMAN	0	0	0	0	0	0	0	0	0
CVS40_11004	CVS40_11004	KAI8117047.1	PK1L3_MOUSE	0	0	0	0	0	0	0	0	0
CVS40_10908	CVS40_10908	KAI8117128.1	DLTB_STRT2	0	0.486737	0	0	0	0	6.16909	3.22982	0
CVS40_10780	CVS40_10780	KAI8117208.1	TI214_VITVI	0	0	0	0	0.331616	0	0.53125	0	0
COL17A1	CVS40_10869	KAI8117212.1	COHA1_HUMAN	0	0	0	0	0	0	0	0	0
CVS40_10871	CVS40_10871	KAI8117313.1	NCKX1_BOVIN	0	0	0	0	0	0	0.350167	0	0
CVS40_10625	CVS40_10625	KAI8117559.1	XGAT4_POPTR	0	0	0	0.0954416	0	0	0	0	0
CVS40_10629	CVS40_10629	KAI8117566.1	C1GLC_HUMAN	0	0	0	0	0	0	0	0	0
LysE	CVS40_10545	KAI8117641.1	LYS1A_LUCSE	0.540031	0	0	0	0	0	0	0	0
CVS40_10547	CVS40_10547	KAI8117643.1	LYS1A_LUCSE	0	0	0	0	0	0	0	0	0
CVS40_10548	CVS40_10548	KAI8117644.1	LYS1A_LUCSE	0	0	0	0	0	0	0	0	0
CVS40_10425	CVS40_10425	KAI8117749.1	RH2A_PLAF7	0	0	0	0.992744	0	0.268724	0	0	0.340443
CVS40_10229	CVS40_10229	KAI8117971.1	SPIKE_ADE05	0	0	0	0	0	0	0	0	0
CVS40_10253	CVS40_10253	KAI8118002.1	OPA1_MOUSE	0	0	0	0	0	0	0	0	0
CVS40_10249	CVS40_10249	KAI8118045.1	DUS26_HUMAN	0.801497	0.497012	0.261152	0	0	0	0	0	0.495843
CVS40_10134	CVS40_10134	KAI8118136.1	GRIA1_HUMAN	0	0	0	0	0	0	0	0	0
CVS40_10054	CVS40_10054	KAI8118304.1	P320_TRYBB	0	0	0	0	0	0	0.14959	0.36548	0
CVS40_9897	CVS40_9897	KAI8118326.1	HISX_STAS1	0	0	0	0.163961	0	0	0.45924	0.37401	0
CVS40_9979	CVS40_9979	KAI8118327.1	VASO1_TABYA	0	0	0	0	0	0	0	0	0
CVS40_9974	CVS40_9974	KAI8118328.1	VASO1_TABYA	0	0	0	0	0	0	0	0	0
CVS40_9975	CVS40_9975	KAI8118329.1	C71BV_ARATH	0	0	0	0	0	0	0	0	0
CVS40_9976	CVS40_9976	KAI8118330.1	VASO1_TABYA	0	0	0	0	0	0	0	0	0
CVS40_9977	CVS40_9977	KAI8118331.1	KAZL2_DOLGE	0	0	0	0	0	0	0	0	0
CVS40_9970	CVS40_9970	KAI8118332.1	RKS1_ARATH	0	0	0	0	0	0	0	0	0
CVS40_9972	CVS40_9972	KAI8118334.1	VASO2_TABYA	0	0	0	0	0	0	0	0	0
CVS40_9973	CVS40_9973	KAI8118335.1	NSD3_HUMAN	0	0	0	0	0	0	0	0	0
CVS40_9978	CVS40_9978	KAI8118356.1	DYHC2_MOUSE	0	0	0	0	0	0	0	0	0
CVS40_9984	CVS40_9984	KAI8118404.1	MK07_RAT	0	0	0	0	0	0	0	0	0
CVS40_9986	CVS40_9986	KAI8118406.1	C36A1_CAEEL	0	0	0	0	0	0	0	0	0
CVS40_9981	CVS40_9981	KAI8118407.1	MCPI_MELCP	0	0	0	0	0.497424	0	0.796875	0	0
CVS40_9980	CVS40_9980	KAI8118408.1	MCPI_MELCP	0	0	0	0	0	0	0	0	0
CVS40_9983	CVS40_9983	KAI8118409.1	Y993_METJA	0	0	0	0	0	0	0	0	0
CVS40_9982	CVS40_9982	KAI8118410.1	ARA1_MAGO7	0	0	0	0	0	0	0	0	0
CVS40_9967	CVS40_9967	KAI8118416.1	VASO3_TABYA	0	0	0	0	0	0	0	0	0
CVS40_9966	CVS40_9966	KAI8118417.1	VASO1_TABYA	0	0	0	0	0	0	0	0	0
CVS40_9965	CVS40_9965	KAI8118418.1	VASOT_HYBBI	0	0	0	0	0	0	0	0	0
CVS40_9969	CVS40_9969	KAI8118421.1	VASOT_HYBBI	0	0	0	0	0	0	0	0	0
CVS40_9968	CVS40_9968	KAI8118422.1	VASO3_TABYA	0	0.427137	0	0	0	0	0	0	0
mthl4	CVS40_9857	KAI8118523.1	MTH4_DROME	0	0	0	0	0	0	0	0	0
CVS40_9669	CVS40_9669	KAI8118703.1	ZMPB_STRR6	0	0.195599	0	0	0	0	0	0	0
CVS40_9697	CVS40_9697	KAI8118740.1	PA11_VESAF	0.0938037	0	0	0	0	0	0.0789872	0.192995	0.087055
CVS40_9689	CVS40_9689	KAI8118789.1	HIS3_LEPIN	0	0	0	0.155316	0.181029	0	0.580038	0.17716	0.3196
Yp2	CVS40_9543	KAI8118819.1	VIT2_DROME	0	0	0	0	0	0	0	0	0.159812
BDMD1	CVS40_9617	KAI8118840.1	DDN1_BOVIN	0	0	0.206003	0	0	0	0.354904	0	0
CVS40_9392	CVS40_9392	KAI8118970.1	CUD2_SCHGR	0	0	0	0	0	0	0.426328	0	0
LCP30	CVS40_9393	KAI8118971.1	CU30_BOMMO	0	0.165086	0	0	0	0	0	0	0
CVS40_9399	CVS40_9399	KAI8118977.1	YI01_SCHPO	0	0	0	0.0637967	0	0	0.178685	0.0727764	0.0656372
CVS40_9427	CVS40_9427	KAI8119037.1	PURL_LACH4	0	0	0	0	0	0	0	0	0
CVS40_9394	CVS40_9394	KAI8119046.1	STK10_XENTR	0	0	0	0	0	0	0	0	0
CVS40_9451	CVS40_9451	KAI8119155.1	TSEP_GLOPP	0	0	0	0	0	0	14.1283	2.72516	1.91202
CVS40_9433	CVS40_9433	KAI8119168.1	I3BA_CONCB	0	0	0	0	0	0	0	0	0
CVS40_9432	CVS40_9432	KAI8119169.1	VPS3_YEAST	0	0	0	0	0	0	0	0	0.466314
CVS40_9387	CVS40_9387	KAI8119171.1	CUD2_SCHGR	0	0	0	0	0	0	0	0	0
CVS40_9386	CVS40_9386	KAI8119172.1	CUD2_SCHGR	0.220721	0.102656	0	0	0	0	0	0	0
CVS40_9379	CVS40_9379	KAI8119179.1	CF015_PANTR	0	0	0	0	0	0	0	0	0
CVS40_9372	CVS40_9372	KAI8119180.1	MED17_ASPTN	0	0	0	0	0	0	5.24091	1.47747	0
CVS40_9374	CVS40_9374	KAI8119186.1	RUTA_ECOS5	0	0	0	0	0	0	0	0	0.186419
CVS40_9246	CVS40_9246	KAI8119238.1	CU08_LOCMI	0	0	0	0	0	0	0	0	0.141623
CVS40_9195	CVS40_9195	KAI8119284.1	LECA_SARPE	0	0	0	0.274684	0.320147	0.223068	0	0	0.282583
CVS40_9031	CVS40_9031	KAI8119570.1	PRMA_AQUAE	0.222303	0	0	0	0	0	0	0	0
CVS40_9032	CVS40_9032	KAI8119573.1	BRS3_MOUSE	0	0	0	1.80856	0	0	0	0	0
CVS40_9034	CVS40_9034	KAI8119575.1	RL17_MARMM	0	0	0	0.270214	0.734853	0.292575	0.0840765	0	0
CVS40_8847	CVS40_8847	KAI8119624.1	STMX_STOCA	0	0	0.450943	0	0	0	0.776907	0	0
CVS40_8849	CVS40_8849	KAI8119633.1	CECA_CULPP	0	0	0	0	0	0	5.07533	0	1.1186
CVS40_8853	CVS40_8853	KAI8119634.1	RPOB_CHLPN	0	0	0	0	0	0	0	0.524744	0
asm-1	CVS40_8831	KAI8119689.1	ASM1_CAEEL	0	0	0	0	0	0	0	0	0
CVS40_8872	CVS40_8872	KAI8119789.1	GBP_MYTSE	0	0	0	0	0	0	0	0	0
CVS40_8871	CVS40_8871	KAI8119793.1	SRX1B_SARPE	0	0	0	0	0	0	0	0	0
CVS40_8852	CVS40_8852	KAI8119820.1	SMC4_CAEEL	0	0	0	0	0	0	26.8251	14.3787	6.33454
CVS40_8684	CVS40_8684	KAI8119980.1	LEDL2_DROME	0.106207	0	0.1038	0	0	0	0	0.109256	0
CVS40_8683	CVS40_8683	KAI8119985.1	PLC_HALLA	0	0	0	0	0	0	0	0	0
CVS40_8680	CVS40_8680	KAI8120004.1	TPC3L_HUMAN	0	0	0	0	0	0.472406	0	0	0.598486
PIG-V	CVS40_8648	KAI8120044.1	PIGV_DROME	0	0	0	0	0	0	0	0	0
CVS40_8517	CVS40_8517	KAI8120118.1	PHR4A_DANRE	0	0	0	0	0	0	0	0	0
CVS40_8510	CVS40_8510	KAI8120122.1	VDAC_DROME	0	0	0	0	0	0	0	0	0
CVS40_8556	CVS40_8556	KAI8120134.1	CUO6_BLACR	0.263696	0	0.515531	0	0	0	0	0	0
CVS40_8534	CVS40_8534	KAI8120138.1	PC11X_GORGO	0	0	0	8.04691	0.937874	0.43564	5.25867	2.14136	0.551908
CVS40_8530	CVS40_8530	KAI8120140.1	CUG1A_TENMO	0	0	0	0.225223	0.525025	0	1.47191	0	0
CVS40_8491	CVS40_8491	KAI8120149.1	CAS2_CONST	0	0	0	0.115453	0	0	0.215604	0	0
CVS40_8526	CVS40_8526	KAI8120181.1	#N/A	0	0	0	0.257988	0.150342	0.104748	3.49252	0.882726	0.132716
CVS40_8527	CVS40_8527	KAI8120182.1	CSP1_CORGL	0	0	0	0	0	0.17595	1.82062	0	0.445847
CVS40_8529	CVS40_8529	KAI8120184.1	SYK_SYNP6	0	0	0	0	0	0	0	0	0
CVS40_8508	CVS40_8508	KAI8120199.1	MALT1_HUMAN	0	0	0	0	0	0	0	0	0
CVS40_8540	CVS40_8540	KAI8120206.1	EQXS_FUSHE	0	0	0	0	0	0	0	0	0
CVS40_8541	CVS40_8541	KAI8120207.1	COOT_SARBU	0.739093	0.687472	0	0	0	0	0.622377	0	0
CVS40_8523	CVS40_8523	KAI8120213.1	FP1_MYTED	0	0	0	0.146965	0	0	2.33228	0	0
CVS40_8485	CVS40_8485	KAI8120218.1	GGLO6_ARATH	0	0	0	0.226344	0.527627	0	0.42263	0.258158	0.232858
CVS40_8505	CVS40_8505	KAI8120228.1	DGKK_HUMAN	0	0	0	2.71477	0.452012	0.629874	10.1377	3.5384	1.59596
CVS40_8501	CVS40_8501	KAI8120230.1	CU15_MANSE	0	0	0	0	0.19658	0	0	0	0.173534
PCDH11Y	CVS40_8533	KAI8120233.1	PC11Y_HUMAN	0	0	0	0	4.98679	0	0	0	0
liph-b	CVS40_8472	KAI8120252.1	LIPHB_XENLA	0.21329	0	0.104248	0	0	0	0	0	0
scw	CVS40_8387	KAI8120349.1	SCW_DROME	0	0	0	0	0	0.114466	0.263173	0	0
CVS40_8258	CVS40_8258	KAI8120430.1	LEDL2_DROME	0.49393	0.459433	0	0	0	0	0.207955	0	0
CVS40_8236	CVS40_8236	KAI8120499.1	LAMA2_HUMAN	0.308237	0	0	0	0	0	0	0	0
CVS40_8135	CVS40_8135	KAI8120611.1	LA1_OPICY	0.385003	0	0	0	0	0	0	0	0
CVS40_7947	CVS40_7947	KAI8120821.1	TASOR_HUMAN	0	0	0	0.228612	0	0	0.213427	0.52146	0
CVS40_7928	CVS40_7928	KAI8120826.1	GUNA_BUTFI	0	0	0	0	0	0	0	0	0
CVS40_7925	CVS40_7925	KAI8120841.1	CSPG2_BOVIN	0	0	0	0	0	0	0	0	0
CVS40_7924	CVS40_7924	KAI8120842.1	PP169_ARATH	0	0	0	0	0	0	0	0	0
CVS40_7926	CVS40_7926	KAI8120843.1	CDGT_THETU	0	0	0	0	0	0	0	0.711001	0
CVS40_7923	CVS40_7923	KAI8120845.1	ATI_VACCW	0	0	0	0	0	0	0	0	0
CVS40_7922	CVS40_7922	KAI8120846.1	DEKP1_ARATH	0	0	0	0	0.69235	0	0	0	0
UVOP	CVS40_7984	KAI8120873.1	OPSUV_APIME	0.133925	0	0	0	0	0	0.338355	0.275546	0
CVS40_7927	CVS40_7927	KAI8120874.1	NDOR1_XENLA	0	0	0	0	0	0	0	0	0
CVS40_7833	CVS40_7833	KAI8121035.1	TILS_VIBA3	0	0	0	1.16533	0	0	0	0	0
CVS40_7854	CVS40_7854	KAI8121098.1	EST2C_RAT	0.321447	0.597992	0	0	0	0	0.541369	1.32269	0.298293
CVS40_7725	CVS40_7725	KAI8121174.1	DIPD_PROTE	0	0	0	0	0	0	0	0	0
CVS40_7760	CVS40_7760	KAI8121194.1	FAK1_XENLA	0	0	0	0	0	0	0	0	0
CVS40_7543	CVS40_7543	KAI8121310.1	GON4L_HUMAN	0	0	0	0	0	0	0	0	0
Ilp2	CVS40_7568	KAI8121349.1	INSL2_DROME	0.567259	0	0	0	0	0	0	0	0
CVS40_7380	CVS40_7380	KAI8121478.1	SYP_CAUVC	0.596499	0	0	0	0	0	0.251141	0	0
CVS40_7382	CVS40_7382	KAI8121480.1	SLX4I_XENTR	0	0	0	0.204331	0.23815	0	0	0	0
CVS40_7464	CVS40_7464	KAI8121504.1	GG6L1_HUMAN	0	0	0	0	0.166339	0	0.133234	0	0
CVS40_7408	CVS40_7408	KAI8121512.1	TENA_HUMAN	0	0	0	0.845671	0	5.4939	0	0	6.09015
CVS40_7366	CVS40_7366	KAI8121625.1	VKT3_PALCA	0	0	0	0	0	0	0	0	0
CVS40_7365	CVS40_7365	KAI8121626.1	KUN2_TABYA	0	0.452806	0.951749	0	0	0	0.409931	0	0
CVS40_7333	CVS40_7333	KAI8121700.1	KLF18_HUMAN	0	0	0	0	0	0	0	0	0
CVS40_7244	CVS40_7244	KAI8121760.1	KBZIP_HHV8P	0	0	0	0	0	0	0	0	0.110865
CVS40_7245	CVS40_7245	KAI8121761.1	RHSB_DICD3	0	0	0	0	0	0	0	0	0
CVS40_7247	CVS40_7247	KAI8121763.1	MB3R2_ORYSJ	0	0	0	0	0	0	0.145119	0	0
CVS40_7248	CVS40_7248	KAI8121764.1	TR102_MOUSE	0	0	0	0	0	0	0	0	0
CVS40_7165	CVS40_7165	KAI8121896.1	PDE12_BOVIN	0	0	0	0.23152	0	1.12803	0	0	0.238191
CVS40_7126	CVS40_7126	KAI8121916.1	ST14_MOUSE	0	0	0	0	0	0	0	0	0.0854696
CVS40_7243	CVS40_7243	KAI8121922.1	KBZIP_HHV8P	0	0	0	0	0	0.010428	0.155856	0.0292933	0.026425
CVS40_7249	CVS40_7249	KAI8121923.1	ADEC2_CARHZ	0	0	0	0	0.476281	0	0	0	0
UGT2B4	CVS40_7107	KAI8121927.1	UGT2_DACCO	0	0	0	0.482284	0	0	0.112553	0	0.372128
LPL	CVS40_6989	KAI8122059.1	LIPL_SHEEP	0	0	0	0.379367	0	0	0	0	0
CVS40_7022	CVS40_7022	KAI8122123.1	RPOP_AGABT	0	0	0	0	0.997178	0.34739	0	0	0.440105
CVS40_6833	CVS40_6833	KAI8122252.1	NU214_HUMAN	0	0	0	0.36243	0	0	0	0	0.372866
CVS40_6633	CVS40_6633	KAI8122460.1	GRID2_DANRE	0	0	0	0.257401	0	0	0	0	0
CVS40_6579	CVS40_6579	KAI8122516.1	HUTI_PSEA6	0	0	0	0	0	0	0	0	0
CVS40_6581	CVS40_6581	KAI8122621.1	Y1751_HELHP	0	0	0	0	0	0	0	0	0
CVS40_6491	CVS40_6491	KAI8122727.1	FMRF_DROME	0	0	0	0	0	0	0	0	0
CVS40_6404	CVS40_6404	KAI8122821.1	RPOC2_NYMAL	0	0	0	0	0.384291	0	0	0	0
CVS40_6481	CVS40_6481	KAI8122877.1	EPI10_PHYIT	0	0	0	0	0	0	0	0	0
CVS40_6321	CVS40_6321	KAI8122958.1	CC157_HUMAN	0	0	0	0.846651	0	0	0	0	0
CVS40_6076	CVS40_6076	KAI8123017.1	CU19_LOCMI	0	0	0.471343	0	0	0	0	0	0
CVS40_6079	CVS40_6079	KAI8123028.1	CU19_LOCMI	0	0	0	0	0.14713	0	0	0	0
CVS40_6240	CVS40_6240	KAI8123033.1	RRF_AYWBP	6.08143	9.61635	2.97243	0	0	0	1.53632	0	0.564338
CVS40_6246	CVS40_6246	KAI8123035.1	MUTL_LISW6	0	0	0	0	0	0	0	0	0
CVS40_6245	CVS40_6245	KAI8123036.1	PAAS_PETHY	0	0	0	0	0	0	0	0	0
CVS40_6248	CVS40_6248	KAI8123040.1	GLNE_BARQU	0.428143	0	0	0	0	0	0	0	0
CVS40_6203	CVS40_6203	KAI8123079.1	DFP3_ANTMY	0.367868	0	0	0	0	0	0.154885	0.189219	0
CVS40_6213	CVS40_6213	KAI8123271.1	AMPN_STRLI	0	0	0	0	0	0	0	0	0.184776
scara5	CVS40_5925	KAI8123465.1	SCAR5_DANRE	0	0.375983	0	0	0	0	0	0	0
CVS40_5825	CVS40_5825	KAI8123497.1	WTR14_ARATH	0	0	0	0.354689	0.20669	0	0.165564	1.21353	0.547353
CVS40_6004	CVS40_6004	KAI8123528.1	PYRG_SHESH	0.189783	0	0	0	0	0	0	0	0
CVS40_6001	CVS40_6001	KAI8123531.1	ZN415_HUMAN	0	0	0	0	0	0	0	0	0
CVS40_5930	CVS40_5930	KAI8123582.1	NNR_METTH	0	0	0	0	0	0	0	0	0
CVS40_5790	CVS40_5790	KAI8123718.1	SURA_CUPMC	0	0	0	0	0	0	0	0	0
Amy4N	CVS40_5632	KAI8123852.1	AMY2_DROAN	0	0	0	0	0	0	0	0	0
CVS40_5503	CVS40_5503	KAI8123923.1	APOL3_HUMAN	0	0	0	0	1.04876	0	0.840055	2.56556	0
CVS40_5595	CVS40_5595	KAI8123962.1	CU16A_LOCMI	0	0	0	0.167723	0.19551	0	0	0	0
CVS40_5590	CVS40_5590	KAI8123965.1	CAP1_DICDI	0	0	0.33927	0	0	0	0	0.357024	0
CVS40_5431	CVS40_5431	KAI8124167.1	#N/A	0	0	0	0	0.402073	0	0	0	0
CVS40_5416	CVS40_5416	KAI8124183.1	CAPAM_DANRE	0	0	0	0.647748	0	0	0	0	0.6664
CVS40_5419	CVS40_5419	KAI8124186.1	NLEE_ECO57	0	0	0	0	0	0	0	0	0
CVS40_5418	CVS40_5418	KAI8124187.1	SYI_ACHLI	0	0	0	0	0	0	0	0	0
CVS40_5277	CVS40_5277	KAI8124260.1	PFKA1_ARATH	0	0	0	1.62225	0	0	0	0.925059	0
MUC1	CVS40_5336	KAI8124299.1	MUC1_MESAU	0	0	0	0.433369	0.126286	0.263942	0	0	0.111471
CVS40_5428	CVS40_5428	KAI8124320.1	INE_DROME	0	0	0	0	0	0	0	0	0
CVS40_5420	CVS40_5420	KAI8124325.1	ADH1_APTAU	0	0	0	0	0	0	0	0	0
CVS40_5421	CVS40_5421	KAI8124326.1	BMRU_BACSU	0	0	0	0	0	0	0	0	0
CVS40_5424	CVS40_5424	KAI8124329.1	CARA_NOSS1	0	0	0	0	0	0	0	0	0
CVS40_4966	CVS40_4966	KAI8124531.1	CM37_CONRE	0	0	0	0	0	0	0.645951	0	0.711836
CVS40_4952	CVS40_4952	KAI8124575.1	#N/A	0	0	0	0	0	0	0	0	0.291356
CVS40_4736	CVS40_4736	KAI8124973.1	CUA1_DROME	0	0	0	0	0	0	0	0	0
CVS40_4792	CVS40_4792	KAI8125009.1	BIK_HUMAN	0	0	0	0.650053	0	0	0	0	0
CVS40_4477	CVS40_4477	KAI8125253.1	#N/A	0.442648	0	0	0	0	0	0	0	0
CVS40_4324	CVS40_4324	KAI8125289.1	AG5L1_CULNU	0	0.207002	0	0	0	0	0	0	0
CVS40_4473	CVS40_4473	KAI8125292.1	ETV4_MOUSE	0	0	0	0	0.10336	0.0719965	0.248346	0	0
CVS40_4546	CVS40_4546	KAI8125424.1	MOS_XENLA	0	0	0	1.47907	3.44773	0	0.69041	0.843414	0
CVS40_4544	CVS40_4544	KAI8125427.1	NTRY_AZOC5	0	0	0	0	0	0	0	0	0
CVS40_4540	CVS40_4540	KAI8125431.1	Y523_XYLFA	0	0	0	0	0	0	0	0	0
CVS40_4447	CVS40_4447	KAI8125438.1	COLL2_MIMIV	0	0	0	0	0	0	0	0	0
Vm34Ca	CVS40_3922	KAI8125874.1	VTU3_DROME	0	0	0	0	0	0	1.07252	0	0
CVS40_3947	CVS40_3947	KAI8125925.1	RLMH_TERTT	0	0	0	0	1.43365	0	10.3352	1.40285	0.632743
CVS40_3666	CVS40_3666	KAI8126048.1	CH18_DROSU	0	0	0	0	0	0	0	0	0
Cp19	CVS40_3665	KAI8126051.1	CH19_DROSU	0	0	0	0	0	0	0	0	0
CVS40_3763	CVS40_3763	KAI8126133.1	C71A9_SOYBN	0	0	0	0	0	0	0	0	0
CVS40_3702	CVS40_3702	KAI8126165.1	GIMA5_HUMAN	0	0	0	0	0	0	0	0	0
CVS40_3529	CVS40_3529	KAI8126192.1	CUD2_SCHGR	0	0	0	0	0	0.184967	0	0	0
CVS40_3612	CVS40_3612	KAI8126271.1	IR75A_DROSE	0	0	0	0	0	0	0	0	0
Vm32E	CVS40_3691	KAI8126363.1	VTU4_DROSE	0	0	0	0	0	0	0	0	0
CVS40_3237	CVS40_3237	KAI8126630.1	VG59_ICHVA	0	0	0	0	0	0	0	0	0
CVS40_3212	CVS40_3212	KAI8126662.1	ANIS6_ANISI	0	0	0	0	0	0	0	0	0
CVS40_3500	CVS40_3500	KAI8126697.1	HTPG_OCEIH	0	0	0	0	0	0.467198	0	0	0
CVS40_3499	CVS40_3499	KAI8126758.1	MP2K3_HUMAN	0	0	0	0	0	0	0	0	0
CVS40_3498	CVS40_3498	KAI8126759.1	SYCC_XENLA	0	0	0	0	0	0	0	0	0
CVS40_3243	CVS40_3243	KAI8126809.1	HUTU_GEOSW	0	0	0	0	0	0	0	0	0
CVS40_3470	CVS40_3470	KAI8126818.1	RPB1_PLAFD	0	0	0	0	0	0	0	0.151826	0.273935
CVS40_3475	CVS40_3475	KAI8126821.1	#N/A	0	0	0	0	0	0	0	0	0
CVS40_3190	CVS40_3190	KAI8126903.1	YME2_ASPFU	0	0	0	0	0	0	0	0	0
CVS40_2631	CVS40_2631	KAI8126922.1	DEFI_PROTE	0	2.64375	1.38922	0	0	0	0	0	0
CVS40_3116	CVS40_3116	KAI8126938.1	OBP67_ANOGA	0	0	0	0.262444	0	0.213116	0	0	0
CVS40_2606	CVS40_2606	KAI8127185.1	FND3B_MOUSE	0	0	0	0	0	0	0.750137	0.458189	0
CVS40_2695	CVS40_2695	KAI8127220.1	R13L4_ARATH	0	0	0	0	0	0	0	0	0
CVS40_3104	CVS40_3104	KAI8127342.1	KCNN1_HUMAN	0	0	0	0	0	0	0	0	0
CVS40_3163	CVS40_3163	KAI8127367.1	SIL1_CANAL	0	0	0.316742	0	0	0	0.272851	0.999952	1.80408
CVS40_3169	CVS40_3169	KAI8127369.1	OBP67_ANOGA	0.246659	0.68831	0	0	0	0	0.830846	0.253743	0
CVS40_2724	CVS40_2724	KAI8127439.1	ORC4_ORYSJ	0	0	0	0	0	0	0	0	0
CVS40_2728	CVS40_2728	KAI8127443.1	LNT_CHLMU	0	0.101768	0	0	0	0	0	0	0
CVS40_2608	CVS40_2608	KAI8127615.1	GLP1_CAEEL	0	0	0	0	0	0	0	0	0
CVS40_2632	CVS40_2632	KAI8127644.1	DEFI_PROTE	0	0	0	0	0	0	0	0	0
CVS40_2281	CVS40_2281	KAI8127753.1	CDV3_CHICK	0	0	0	0	0	0	0	0	0
CVS40_2103	CVS40_2103	KAI8127853.1	KUN2_TABYA	0	0	0	0	0	0	0	0	0
CVS40_2419	CVS40_2419	KAI8127903.1	FAT3_RAT	0	0	0.182616	0	0	0	0	0	0
CVS40_2213	CVS40_2213	KAI8128052.1	CUD1_SCHGR	0	0	0	0	0	0	0	0	0
CVS40_2291	CVS40_2291	KAI8128115.1	K0754_HUMAN	0	0	0	0	0	0	0	0	0
CVS40_2292	CVS40_2292	KAI8128116.1	YPRO_OWEFU	0	0	0	0.748116	0.290633	0	0.232814	0.284407	0
CVS40_2298	CVS40_2298	KAI8128118.1	RH2A_PLAF7	0	0	0	0.0932003	0	0	0	0	0.0958758
CVS40_2308	CVS40_2308	KAI8128187.1	#N/A	0	0	0	0	0	0	0	0	0
CVS40_2307	CVS40_2307	KAI8128194.1	#N/A	0	0	0	0	0	0	0	0	0
Cp38	CVS40_2423	KAI8128275.1	CH38_DROME	0	0	0	0	0	0	0	0	0
CVS40_2421	CVS40_2421	KAI8128277.1	NM111_ASPCL	0	0.137495	0	0	0	0	0	0	0
CVS40_2420	CVS40_2420	KAI8128278.1	XDHB_ECO57	0.0881529	0.0819988	0	0	0	0	0.0742509	0	0
CVS40_1592	CVS40_1592	KAI8128419.1	#N/A	0.687645	0	0	0	0	0	0	0	0
CVS40_1591	CVS40_1591	KAI8128422.1	ARGJ_DESPS	0	0	0	0	0	0	0	0.229931	0
CVS40_1660	CVS40_1660	KAI8128475.1	AT5F1_RAT	0	0.149386	0	0	0	0	0	0.165193	0
CVS40_1762	CVS40_1762	KAI8128594.1	GFRA2_CHICK	0	0	0	0	0	0	0	0	0
mig-6	CVS40_1967	KAI8128624.1	PPN1_CAEEL	0	0	0	0	0	0	2.07965	0.423421	0.763921
CVS40_1966	CVS40_1966	KAI8128625.1	KUN2_TABYA	0	0	0	0	0	0	0	0	0
CVS40_1810	CVS40_1810	KAI8128804.1	SOXS_ECO57	0	0	0	0	0.665305	0	0	0	0
CVS40_1855	CVS40_1855	KAI8128880.1	AMCI_APIME	0	0	0	0	0	0	0	0	0
CVS40_1854	CVS40_1854	KAI8128881.1	AMCI_APIME	0	0	0	0	0	0	0	0	0
CVS40_1858	CVS40_1858	KAI8128887.1	AMCI_APIME	0	0	0	0.302425	0	0	0	0	0
CVS40_1778	CVS40_1778	KAI8128922.1	G12_ANOGA	0	0	0	0	0	0	0	0	0
CVS40_0930	CVS40_0930	KAI8129154.1	YEZB_SCHPO	0.332531	0	0	0	0	0	0	0	0
Pstk	CVS40_1517	KAI8129356.1	PSTK_MOUSE	0	0	0	0	0	0	0	0	0
CVS40_0922	CVS40_0922	KAI8129587.1	BAG_STRAG	0	0	0	0	0	0	0	0	0
boss	CVS40_1135	KAI8129733.1	BOSS_DROME	0	0	0	0.0435184	0	0.0353441	0.0812523	0	0.447653
CVS40_0856	CVS40_0856	KAI8129953.1	SPT61_ARATH	0	0.0877862	0	0	0	0	0.0794578	0.194152	0.0875739
CVS40_0857	CVS40_0857	KAI8129954.1	Y953_STAS1	0	0	0	0	0	0	0	0	0
CVS40_0497	CVS40_0497	KAI8129971.1	HMU_HALWD	0	0	0	0.275201	0	0	0.0642194	0	0.141565
CVS40_0544	CVS40_0544	KAI8130041.1	LIGI_COMTE	0	0	0	0	0	0	0	0	0
CVS40_0388	CVS40_0388	KAI8130070.1	MTLD_MYCMS	0.267877	0	0	0	0	0	0	1.10224	0.248568
CVS40_0194	CVS40_0194	KAI8130185.1	LRP4_RAT	0	0	0	0	0	0	0.168182	0	0.185323
CVS40_0858	CVS40_0858	KAI8130351.1	POLG_HCVJK	0	0	0	0	0	0	0	0	0
CVS40_0855	CVS40_0855	KAI8130354.1	#N/A	0	0.0411999	0.129904	0	0	0	0	0.22783	0
CVS40_0119	CVS40_0119	KAI8130381.1	MAGL2_MOUSE	0	0	0	0	0	0	0	0	0
CVS40_0177	CVS40_0177	KAI8130472.1	SPRR3_HUMAN	0	0.373745	0	0	0	0	0	0	0
nas-4	CVS40_0231	KAI8130492.1	NAS4_CAEEL	0	0	0	0.123511	0.143949	0	0	0	0
CVS40_0784	CVS40_0784	KAI8130513.1	SYYM_NEUCR	0.888208	0	0	0	0	0	0.747944	0	1.64846
CVS40_0724	CVS40_0724	KAI8130616.1	AC150_NPVAC	1.70178	0.52764	0	0	0	0	0	0	0
CVS40_0684	CVS40_0684	KAI8130764.1	NOP14_DEBHA	0	0	0	0	0	0	0	0	0.432011
CVS40_0642	CVS40_0642	KAI8130872.1	PABP2_DROME	0.338271	0	0	0	0	0	0.759604	0	0
CVS40_0645	CVS40_0645	KAI8130873.1	ASTB_PARXL	0	0	0	0	0	0	0.252641	0.308627	0
CVS40_0647	CVS40_0647	KAI8130875.1	METB_HERAU	0	0	0	0.393392	0.15284	0.212976	0.36726	0.149542	0
CVS40_0646	CVS40_0646	KAI8130876.1	OFUT7_ARATH	0	0	0	0	0	0	0	0	0
CVS40_0648	CVS40_0648	KAI8130878.1	DER_DEIRA	0	0	0	0.10977	0.895602	0.356575	0.307448	0	0
CVS40_0860	CVS40_0860	KAI8130887.1	RCLA_ECOLI	0	0	0	0	0	0	0	0	0
CVS40_0863	CVS40_0863	KAI8130888.1	RNC_CHLCH	0	0	0	0	0	0	0	0	0
CVS40_0862	CVS40_0862	KAI8130889.1	FOLQ_LACLA	0	0	0	0	0	0	0	0	0
CVS40_9145	CVS40_9145	KAI8119434.1	LECA_SARPE	3.63358	1.1266	0	3.71448	0.509324	0	0.203984	0.498381	0
LRP4	CVS40_2236	KAI8128036.1	LRP4_HUMAN	1.86077	0.901767	0.152843	3.21578	1.46304	0.584133	1.58009	1.72115	0.681991
CVS40_3017	CVS40_3017	KAI8127571.1	CENPQ_YEAST	2.74902	2.55702	1.19435	5.51026	7.7067	1.78987	15.1755	2.19949	0.850338
CVS40_10718	CVS40_10718	KAI8117384.1	A13_FOWPN	0.439764	1.22715	0.429889	1.785	1.61811	0.161069	0.740635	0.452385	1.02022
CVS40_12412	CVS40_12412	KAI8115395.1	SETB1_XENLA	13.4454	12.352	13.1435	54.8744	35.4247	14.8943	48.6433	50.2025	20.5639
Obp56h	CVS40_5491	KAI8123860.1	OB56H_DROME	8.20993	6.78801	0.445865	21.8046	13.9055	5.01133	7.29751	11.7299	2.96278
CVS40_4386	CVS40_4386	KAI8125345.1	BUAD_ASPBU	2.29637	2.13599	0.841802	5.56669	2.56503	0.630767	1.81288	0.885854	1.8646
sca	CVS40_10892	KAI8117174.1	SCA_DROME	1.45851	0.589846	0.061983	2.08776	1.76665	0.441267	0.800992	1.3699	0.205963
CVS40_3247	CVS40_3247	KAI8126804.1	GLGA_SYNPW	0.37959	0.353079	0.371066	0.855975	1.3967	0.417063	1.27858	0.97621	0
grk	CVS40_7627	KAI8121220.1	GRK_DROME	13.2563	10.1005	5.65217	34.9811	17.9391	7.95392	23.7509	15.0875	9.68414
CVS40_10888	CVS40_10888	KAI8117124.1	NST1_DEBHA	1.00928	0.375514	0.0493231	1.36555	0.742727	0.0739354	0.849894	0.622945	0.0468425
CVS40_12502	CVS40_12502	KAI8115248.1	OBSCN_MOUSE	0.419216	0.362084	0.087807	0.864303	0.377757	0.0877413	0.453876	0.400444	0.166731
FAT1	CVS40_0941	KAI8129624.1	FAT1_HUMAN	0.251264	0.311609	0.245607	0.1511	0.176093	0.184033	0	0.0861442	0
CVS40_7921	CVS40_7921	KAI8120875.1	MURI_CAMJE	19.6295	12.1217	4.95709	33.641	10.7767	4.27353	9.27499	18.6784	7.28626
olpB	CVS40_7786	KAI8121004.1	Z512B_HUMAN	57.9485	35.9819	5.57432	192.257	79.0669	26.4159	145.743	175.505	48.1968
CVS40_9849	CVS40_9849	KAI8118522.1	ATX2_ARATH	48.7116	24.1497	0.483428	66.6872	67.0666	17.3873	118.893	323.295	74.5733
CVS40_5409	CVS40_5409	KAI8124335.1	HEXD_BOVIN	0.330901	0.61558	0.32347	1.49236	0.347872	0.727134	0.278647	0.340398	0.614133
CVS40_3607	CVS40_3607	KAI8126031.1	CLZ14_COCLU	0.266804	0.124087	0.130408	0.360998	0	0	0	0.13724	0
NetB	CVS40_7347	KAI8121657.1	NETB_DROME	3.13261	1.52415	0.235552	4.99916	3.39461	0.953131	3.04375	3.02421	0.894453
CVS40_0615	CVS40_0615	KAI8130393.1	CAPP_RHOP2	1.10662	0.171561	0.540885	2.66178	1.55117	1.08077	1.70842	0.37946	0.855759
FCN2	CVS40_4922	KAI8124431.1	FCN2_BOVIN	0	0	0	0.206626	0	0	0	0	0
CVS40_5606	CVS40_5606	KAI8124027.1	MUC2_MOUSE	0.565738	0.336784	0.0663524	1.00018	0.642332	0.182327	0.552621	0.302616	0.125999
CVS40_9377	CVS40_9377	KAI8119185.1	CF015_MOUSE	17.1526	8.74931	6.49062	40.4259	18.614	15.8062	14.9098	18.2141	12.8364
CVS40_9371	CVS40_9371	KAI8119183.1	NST1_NEOFI	2.53774	1.4163	0.9923	4.57807	4.26862	1.1153	6.83834	5.74325	1.88396
Lcp9	CVS40_9389	KAI8119097.1	LCP9_DROME	2460.95	1374.54	308.422	4210.56	2163.69	684.708	2878.64	4401.96	1632.77
CVS40_4025	CVS40_4025	KAI8125821.1	SAPB_SARPE	12.4735	10.2374	4.30356	20.5167	4.62821	0.537447	0	0	0.680886
Obp56d	CVS40_5496	KAI8123863.1	OB56D_DROME	2172.91	1466.01	170.117	3674.92	2410.96	760.477	2694.53	3117.6	1046.67
CVS40_12233	CVS40_12233	KAI8115606.1	GLMU_STRS2	0	0	0	0	0	0	0	0	0
CVS40_0773	CVS40_0773	KAI8130173.1	PUX8_ARATH	2.70015	1.50694	1.58371	4.87107	5.10954	1.18668	2.27375	1.11106	0.501132
Amyrel	CVS40_6898	KAI8121942.1	AMYR_DROAP	0.135281	0.62915	0.396721	0	0	0.693619	6.94883	2.92237	0.753205
CVS40_11727	CVS40_11727	KAI8116143.1	CLB4_ANOGA	0.453836	0.140704	0.147885	0.591296	0.212043	0	0.552018	0.518733	0.514734
CVS40_5413	CVS40_5413	KAI8124177.1	MUC5B_HUMAN	2.10612	1.50694	1.58371	4.23783	3.23604	0.356005	4.77487	3.66649	1.35306
CVS40_3249	CVS40_3249	KAI8126800.1	HTPG_LEGPL	2.61643	0.486737	0	1.88801	0	0	0	1.07661	0.485593
PRP1	CVS40_3474	KAI8126823.1	PRP1_MEDTR	0	0	0	0	0	0	0	0	0
CVS40_6979	CVS40_6979	KAI8122168.1	IGA1A_STRPN	49.658	73.9757	75.0897	167.268	226.764	65.6427	128.062	215.906	102.243
CVS40_12297	CVS40_12297	KAI8115530.1	GLOL_GLAL2	0	0	0.735925	0.679052	0	0.275716	0	0	0
CVS40_7397	CVS40_7397	KAI8121561.1	RBOHB_ARATH	0.573687	1.42298	0	0.517465	0	1.961	0.161034	0.19671	0
CVS40_12324	CVS40_12324	KAI8115559.1	Y3730_DICDI	0.137117	0.127525	0.26807	0.618365	0.720709	0.301291	0	0	0
CHRNA10	CVS40_4408	KAI8125471.1	ACH10_CHICK	4.56548	2.1233	0.159397	5.14756	4.62821	0.836029	3.7072	2.18052	1.05916
CVS40_7222	CVS40_7222	KAI8121722.1	CU16_MANSE	8.83418	4.15761	1.13358	13.5596	9.35375	2.88795	9.94247	10.953	3.75654
lev-9	CVS40_9290	KAI8119427.1	LEV9_CAEEL	3.06126	1.80897	0.352061	4.74286	3.25612	0.870544	2.63849	2.40815	1.26999
Neto2	CVS40_0219	KAI8130464.1	MYL9_BOVIN	0.835345	0.221987	0	0.43056	0.878186	0.174829	0.904408	0.122746	0.221471
CVS40_6075	CVS40_6075	KAI8123014.1	CAC1S_LITCT	3.86568	1.39188	0.243787	7.42358	6.81691	0.822056	5.04033	3.72006	3.00865
Obp28a	CVS40_4196	KAI8125488.1	OB28A_DROME	0.17656	0.328452	0	0.159265	0	0	0.446027	0.181637	0.163848
CVS40_0582	CVS40_0582	KAI8130348.1	PHEG_SYNPY	0.754616	0.25525	0.134133	0.556905	0.721197	0.050248	1.09759	0.705702	0.381961
CVS40_10735	CVS40_10735	KAI8117353.1	VPS27_PHANO	0.837319	0.333787	0.818516	1.61841	0.251501	0.438084	1.108	0.984398	1.55401
CVS40_7241	CVS40_7241	KAI8121758.1	ACH2_DROME	1.79531	0.918458	0.701999	3.40068	1.69865	0.789018	1.88975	3.50899	0.749699
CVS40_7020	CVS40_7020	KAI8122121.1	PURA_FRACC	0	0.776773	0	0	0.438964	0	0	0	0.387474
SMPDL3B	CVS40_7567	KAI8121357.1	ASM3B_HUMAN	0.639241	0.237831	0	0.807232	0.448017	0.124861	0.28709	0.701425	0.237268
CVS40_6243	CVS40_6243	KAI8123030.1	RL4_METKA	0.636029	0.236656	0.248688	1.03265	0.401189	0.279526	1.28541	0.523425	0.236086
CVS40_9435	CVS40_9435	KAI8119162.1	YL138_MIMIV	0.272935	0.507729	0	0	0	0.399826	0	0.561518	0
CVS40_0335	CVS40_0335	KAI8130818.1	S29A2_HUMAN	0.274771	0	0	0	0.144424	0	0	0.14132	0.254996
CVS40_11474	CVS40_11474	KAI8116459.1	HTRA3_HUMAN	0.886265	0.206086	0	0.799409	0.232917	0.811463	0	0.911699	0.411214
CVS40_3238	CVS40_3238	KAI8126641.1	ANKHM_CAEEL	3.80048	4.04005	2.65367	6.6112	8.84695	1.59073	4.34329	5.30582	4.28247
CVS40_10099	CVS40_10099	KAI8118236.1	CTR1_SOLIN	0	0.881251	0	1.06822	0.498006	0.520475	0.199454	0.243664	0.2198
IGSF10	CVS40_7672	KAI8121122.1	IGS10_HUMAN	6.67287	3.85575	0.790669	10.0315	5.42075	1.33302	5.10827	4.57625	1.50115
liph-a	CVS40_0336	KAI8130821.1	LIPHA_XENLA	2.73929	2.54796	0.956347	0.705952	0.822792	3.7263	0.329529	0.402557	0.181576
CVS40_0266	CVS40_0266	KAI8130450.1	CBIE_METJA	6.44739	3.53926	1.85979	11.8217	5.33355	4.0258	4.53919	9.35063	3.53094
NINAA	CVS40_0018	KAI8130564.1	CYPR_CALVI	0.567259	0.52764	0	0.511667	0	0.623258	0.477678	0	0
CVS40_7297	CVS40_7297	KAI8121669.1	CBPB_ASTAS	1.86468	1.12016	0.759501	3.95955	3.75725	1.65038	2.38803	2.59755	2.09086
Lk	CVS40_6758	KAI8122258.1	LCK_DROME	3.53031	2.98522	0.627461	6.36867	3.03657	1.41048	5.94562	1.32059	2.68038
GLRA3	CVS40_10363	KAI8117842.1	PHCL2_ANOGA	12.3717	13.7421	3.87474	27.6273	15.4054	5.0149	9.20423	3.70682	0.780233
CVS40_2105	CVS40_2105	KAI8127855.1	CASA2_CAMDR	0.217048	0.403789	0.84872	1.95782	1.82549	0.953925	1.645	1.3397	2.61846
tsg	CVS40_3270	KAI8126587.1	TSG_DROME	0.51926	0.241498	0.253786	0.702558	0	0.380347	0.218634	1.06832	0.481858
Hug	CVS40_0191	KAI8130179.1	HUGIN_DROME	6.11612	3.79263	0.166091	6.89591	6.07258	1.11998	5.15027	4.3692	0.94593
Crz	CVS40_0580	KAI8129923.1	CORZ_DROVI	3.34517	2.63284	0	4.64206	2.43466	0.376964	1.5168	2.91176	0
Tmem67	CVS40_8063	KAI8120758.1	MKS3_RAT	0.0624416	0.174255	0.0610307	0.337956	0.131311	0.182958	0.210338	0.12847	0.115881
CVS40_7908	CVS40_7908	KAI8120828.1	RLP_RHORT	2.75839	2.13811	2.13468	5.39079	1.81241	0.926044	1.93565	1.18231	0.319963
CVS40_10050	CVS40_10050	KAI8118300.1	ASSY_ACIBT	0.27723	0.515722	0.271011	0	0.874322	0	4.55217	5.27581	0
CVS40_2570	CVS40_2570	KAI8127775.1	#N/A	0	0	0	0	0	0	0	0	0.3196
CVS40_3960	CVS40_3960	KAI8125912.1	#N/A	551.714	314.67	193.142	941.427	424.43	260.348	551.384	697.082	286.465
CVS40_8424	CVS40_8424	KAI8120273.1	CC85C_XENTR	0.261633	0.24336	0.511535	0.708004	0.825184	0.191648	0.220311	0.807455	0.242803
CVS40_8866	CVS40_8866	KAI8119611.1	SRX1B_SARPE	7.01338	1.63089	1.71397	6.32606	0.921634	0.642145	2.21469	0	1.62705
CVS40_4449	CVS40_4449	KAI8125497.1	CUA3A_TENMO	1.04747	0.519634	0.477844	1.5747	0.51389	0.358051	0.294032	1.29304	0.129602
syg-1	CVS40_1038	KAI8129708.1	SYG1_CAEEL	0.312893	0	0.226562	0.721252	0.353306	0	0	0	0
CVS40_5598	CVS40_5598	KAI8123956.1	CU01_ANOGA	0.218941	0	0.42803	0	0	0.320725	0	0	0.203167
CVS40_5070	CVS40_5070	KAI8124461.1	#N/A	0.261803	0.243532	0.0639716	0.177115	0.412859	0.0958941	2.3149	0.673314	0.364431
Ilp1	CVS40_7569	KAI8121348.1	INSL1_DROME	1.63053	0	0	2.05903	0.34283	0.716596	0.274616	0.670929	0
CVS40_5558	CVS40_5558	KAI8123745.1	SP34_APIME	0.107309	0.399295	0.10492	0.290405	0	0.314436	0	0.110413	0
CVS40_8891	CVS40_8891	KAI8119538.1	CUT4_CAEEL	0.209702	0.195055	0	0.236429	0.385784	0.153594	0.0882832	0.215711	0
CVS40_5953	CVS40_5953	KAI8123384.1	ISPH_CHLPM	12.7003	8.05448	3.95025	20.4118	10.0744	4.14392	10.8891	11.7583	5.46417
CVS40_6721	CVS40_6721	KAI8122533.1	CP18A_ARATH	0.560974	2.86986	5.48376	5.31297	4.42308	8.83438	342.952	93.4858	37.7411
CVS40_9779	CVS40_9779	KAI8118648.1	TX53A_ETHRU	9.73446	5.33573	1.86919	13.0139	6.76155	1.40059	9.80737	7.33155	3.38748
bdl	CVS40_10209	KAI8118003.1	BDL_DROME	3.0644	2.18327	0.254934	4.29316	1.37088	1.38497	1.09808	0.804855	0.181518
CVS40_9793	CVS40_9793	KAI8118621.1	TRMY_METTP	3.91705	0.728694	0	2.82654	1.64718	0	1.97909	3.22357	0.363491
TRYP3	CVS40_3064	KAI8127258.1	TRY3_ANOGA	0.752831	0	0	0.452701	0.263812	0	0.211309	0	0.232858
tectonic	CVS40_7472	KAI8121585.1	TECT_DROME	0.197129	0.0611123	0	0.177809	0.0690752	0.192512	0.11067	0.0675999	0.182931
CVS40_1360	CVS40_1360	KAI8129231.1	TRIM2_CALJA	0.114768	0.106753	0.112202	0.207053	0.30164	0.0840737	0.0966379	0.177099	0.212997
CVS40_11273	CVS40_11273	KAI8116724.1	ATPA_PROM0	0	0.725886	0.381433	0.703911	0.410207	0	2.62861	0.401394	0
CVS40_8557	CVS40_8557	KAI8120209.1	CUO6_BLACR	0	0.185228	0.0973299	0.179623	0.104668	0	0	0	0.0923879
acr-16	CVS40_8804	KAI8119853.1	ACH1_CAEEL	0.184952	0	0	0.250224	0	0	0	0.285381	0
EURM3	CVS40_10098	KAI8118235.1	EURM3_EURMA	0	0.230267	0	0.111664	0	0	0	0	0
CVS40_0613	CVS40_0613	KAI8130395.1	PUR5_DECAR	0	0.338486	0	0.164121	0	0	0	0	0
LCP17	CVS40_10111	KAI8118105.1	CU17_BOMMO	60.9616	45.5014	11.3371	88.1137	42.048	17.5345	76.2507	54.4516	19.7307
CVS40_6543	CVS40_6543	KAI8122801.1	ERPA_ACIB5	0.503204	0.572071	0.163962	0.806913	0.881685	0.245724	0.376656	0.747709	0.36319
CVS40_7023	CVS40_7023	KAI8122124.1	ERG8_GIBZE	0.432717	0.402494	0	0.39031	0	0	0.728766	0.445135	0.803097
CVS40_8546	CVS40_8546	KAI8120208.1	CUH1C_TENMO	0.524641	0	0	0.236616	0	0	1.76716	0.539698	0.730277
CVS40_8851	CVS40_8851	KAI8119819.1	PLM5_PLAFX	0.713069	0	0	0.321593	0	0	53.7413	21.6392	5.29365
CVS40_8830	CVS40_8830	KAI8119688.1	ISLA_DESDA	0.67168	0	0	0.302927	0	0	0.565609	0	0
Ilp7	CVS40_2344	KAI8128251.1	INSL7_DROME	0.48975	0	0	0.220874	0	0	0	0.251916	0
Nmdar1	CVS40_1288	KAI8129856.1	NMDA1_DROAN	1.3845	1.11378	0.146317	1.68759	1.02279	0.137032	0.882275	1.27026	0.65975
CVS40_7282	CVS40_7282	KAI8121720.1	#N/A	408.301	270.551	89.9836	583.031	285.623	128.619	375.063	408.182	168.317
CVS40_9440	CVS40_9440	KAI8119116.1	T2C1_PBCVI	0.366073	0.272412	0.143152	0.528315	0.307878	0.0536353	0	0	0
CVS40_11062	CVS40_11062	KAI8116944.1	SED2_ASPFU	3.07501	1.63442	0.214714	3.46707	1.5009	0.804422	1.29471	2.71137	0.20383
cadm3	CVS40_5791	KAI8123719.1	CADM3_XENLA	0.752656	0	0	0	0	0	0.277293	0	0
Eh	CVS40_9961	KAI8118413.1	ECLH_DROME	2.39016	2.62744	0.424815	3.52786	0.913723	1.11411	3.11055	2.01171	1.00818
CVS40_6077	CVS40_6077	KAI8123018.1	CU18B_LOCMI	2.03325	2.26949	1.78883	3.30117	3.42004	0.595724	2.56824	0.83664	0.566038
CVS40_8521	CVS40_8521	KAI8120212.1	G2L2L_XENLA	3.20599	4.30743	3.83044	11.5672	7.86429	4.17479	6.14932	5.13021	7.76821
CVS40_8498	CVS40_8498	KAI8120146.1	CRDR_HELPY	0	0.988805	0	0	0	0.389332	0.895177	0	1.47972
CVS40_5999	CVS40_5999	KAI8123375.1	Y1856_ARCFU	6.84371	4.34026	0.608184	6.17301	1.30813	0.683573	7.07272	3.84006	1.44335
GLB1	CVS40_4967	KAI8124532.1	BGAL_BOVIN	8.45346	5.61646	6.62906	18.853	8.98466	4.89915	9.15236	17.201	8.6204
CVS40_10570	CVS40_10570	KAI8117512.1	CO6A6_MOUSE	0.869978	0.719303	0	0.9591	0.304865	0.212415	0.488395	0.198872	0.089707
CVS40_2703	CVS40_2703	KAI8127408.1	RPOD_RICBR	21.031	10.4054	4.24922	26.235	16.4646	5.80606	18.8941	14.1381	5.57605
CVS40_2044	CVS40_2044	KAI8128662.1	LYS1A_LUCSE	0.215212	0.800712	0.631128	0.388236	1.13123	0.472908	1.08734	0.664155	0.399415
CVS40_12062	CVS40_12062	KAI8115782.1	HDP1_PLAFO	0	1.26421	0.885744	0.408646	1.1907	1.32739	30.9016	8.62188	2.31227
CVS40_11181	CVS40_11181	KAI8116796.1	LECA_SARPE	1.01637	1.41807	2.48386	2.29191	3.20548	0.558352	2.78156	1.56831	3.53685
CVS40_11413	CVS40_11413	KAI8116538.1	NSS_TSWV1	0.573687	1.06724	0	0.172499	0.804145	0.140068	0	0	0
CVS40_5742	CVS40_5742	KAI8123654.1	LEDL2_DROME	25.7517	10.1725	0.842623	25.0259	18.4069	6.35328	9.43615	14.7971	3.59951
CVS40_8484	CVS40_8484	KAI8120219.1	#N/A	23.2083	9.05278	5.48883	24.8168	11.2155	5.48375	34.8312	57.183	20.6682
CVS40_12176	CVS40_12176	KAI8115556.1	#N/A	7.76593	2.77828	2.91982	7.00485	0.628016	1.75027	3.52129	5.53071	0.55435
CVS40_9378	CVS40_9378	KAI8119178.1	WDR91_MOUSE	0	0.254219	0.534315	0.739534	0.287303	0.400365	0.920546	2.2491	0
CVS40_8983	CVS40_8983	KAI8119806.1	ILVD_DESVM	0.171079	0.159127	0.100327	0.154302	0.251769	0.0250656	0.0576297	0.105602	0.190483
fezf1	CVS40_4785	KAI8124955.1	ERM_DROME	0.530135	0	0	0.318787	0.371549	0.129439	0.223194	0.181789	0
CVS40_9520	CVS40_9520	KAI8118809.1	METE_STAES	1.90233	3.69979	2.36678	5.61566	2.72712	1.39342	3.49509	3.38014	1.60482
CVS40_7286	CVS40_7286	KAI8121716.1	LECA_SARPE	3.76925	1.59363	0.334964	2.47262	2.52163	0.25099	0.86564	1.40997	0.317977
nAChRbeta1	CVS40_8481	KAI8120222.1	ACH3_DROME	2.94241	0.684226	0.143824	2.52135	1.31466	0.592695	1.85831	1.43776	0.614356
Pxdn	CVS40_0023	KAI8130747.1	PXDN_MOUSE	67.7883	53.9435	38.4168	120.604	60.5837	37.1508	95.7206	79.9764	44.5392
CVS40_2301	CVS40_2301	KAI8128192.1	CLIP1_RAT	0.25731	0.478697	0	0.348154	0	0.0942355	0.108346	0.529411	0
CVS40_4712	CVS40_4712	KAI8124968.1	CBPA1_ANOGA	9.60269	12.1744	4.62923	11.3313	22.2647	12.6704	16.0617	11.7727	5.79826
CVS40_11430	CVS40_11430	KAI8116524.1	LIPE_CROAD	0	0.170157	0.178835	0	0	0.133995	0.154062	0	0
CVS40_1419	CVS40_1419	KAI8129165.1	PROH4_CAMFO	3.10982	2.19839	0.607997	4.26368	1.83081	1.64007	2.72347	3.71092	0.923463
CVS40_7399	CVS40_7399	KAI8121534.1	IQEC2_MOUSE	0.429961	1.19979	1.26092	0.387824	0	1.25975	0.362062	0.4423	0
Tex9	CVS40_3149	KAI8127391.1	SIFA_DROME	1.22983	0.635518	0.133573	0.369767	1.2929	0.200174	0.69041	0.421707	0.380414
CVS40_9940	CVS40_9940	KAI8118395.1	GRP1_HUMAN	0.472937	0.307934	0.323621	0.853176	0.497192	0.242491	0.796502	0.973019	0.175551
CVS40_3880	CVS40_3880	KAI8126214.1	ERV46_YEAST	0.146102	0	0.142844	0	0	0.107014	0.123026	0.150303	0
Ddr2	CVS40_7466	KAI8121506.1	DDR2_MOUSE	1.38485	0.944628	0.947627	2.62318	1.55293	0.845312	1.28277	2.75422	1.07092
CVS40_10864	CVS40_10864	KAI8117246.1	#N/A	0.0908653	0.169011	0	0	0.0955099	0	0	0	0
CVS40_2917	CVS40_2917	KAI8127684.1	LY75_MOUSE	1.90152	1.32653	2.55587	2.14396	1.99904	4.00436	0.400308	0.733533	1.10284
retinin	CVS40_8532	KAI8120139.1	RETIN_DROME	0.398253	0	0	19.2184	3.14008	0.875135	13.9175	4.71134	2.40218
CVS40_6734	CVS40_6734	KAI8122444.1	HANG_DROME	0.725848	0.225052	0.473032	1.09119	0.508716	0.443057	0.305611	0.746679	0.561304
CVS40_7723	CVS40_7723	KAI8121168.1	DIPD_PROTE	72.1122	57.4052	81.0884	71.1306	69.2992	138.857	139.796	111.045	61.581
Ncam2	CVS40_4800	KAI8124771.1	NCAM2_MOUSE	1.00253	0.423869	0.0890953	1.1509	0.383254	0.667576	1.45819	0.843794	0.084576
Fas1	CVS40_6170	KAI8122940.1	FAS1_DROME	9.91033	7.17431	3.59456	14.885	9.9943	4.4343	9.818	10.5177	5.78422
CVS40_12319	CVS40_12319	KAI8115698.1	PIF_PINFU	4.06501	4.12483	8.85057	5.33328	7.38148	11.9101	43.2552	20.1481	34.1214
CVS40_8482	CVS40_8482	KAI8120221.1	PLPK1_ARATH	234.881	207.177	125.718	426.087	237.292	146.364	611.376	656.922	251.646
CVS40_3252	CVS40_3252	KAI8126609.1	R1AB_BCHK5	1.03059	1.91723	1.51117	2.32398	1.08345	0	0.433922	0.530085	3.82544
igdb-2	CVS40_11938	KAI8115915.1	IGDB2_CAEEL	9.50958	8.48064	4.53621	19.5133	11.5604	8.58129	11.9842	9.63121	7.4903
AttA	CVS40_6949	KAI8122033.1	ATTA_DROME	3.16919	1.76871	3.40783	4.00205	6.99663	2.5535	5.33744	9.12841	3.5291
RPTN	CVS40_0757	KAI8130235.1	RPTN_HUMAN	0	0	0.141864	0	0	0.0531447	0.244404	0.0746339	0
CVS40_8878	CVS40_8878	KAI8119784.1	XYLB_BACOV	4.16871	2.65306	5.14749	2.77065	2.30658	6.4284	2.03233	2.48273	3.46123
capa	CVS40_0383	KAI8130081.1	CP2B_DROPS	1.9514	1.00839	0	1.36901	0.227951	0.317635	4.01679	2.0074	1.20722
CVS40_10549	CVS40_10549	KAI8117634.1	LYS1A_LUCSE	0.475379	0.442177	0.464704	0	0.499759	0	0.400308	0	0
GluClalpha	CVS40_4927	KAI8124714.1	GLUCL_DROME	0.116803	0.0465576	0.146821	0.105367	0.22804	0.0611106	0	0.137331	0.0309593
CVS40_12632	CVS40_12632	KAI8115142.1	CTHB5_CONVC	3.72721	1.92605	1.2145	2.98838	0.870746	0	3.48734	3.40815	0.384304
CVS40_9456	CVS40_9456	KAI8119158.1	TSEP_GLOPP	16.3853	10.7162	16.2676	24.9403	9.15109	6.37598	7.54563	7.90101	13.7796
AstA	CVS40_0468	KAI8130307.1	ALLS_DROME	1.9122	1.01637	1.06815	2.54614	1.14873	0.800371	2.91375	1.68607	0.760487
CVS40_7287	CVS40_7287	KAI8121717.1	LECA_SARPE	2.64375	0.737731	0	1.19233	1.11174	0	0.890502	0.271952	0
CVS40_2729	CVS40_2729	KAI8127444.1	#N/A	0.731529	0.56703	2.06585	1.61294	2.34986	1.72656	2.1218	1.04517	3.01705
CVS40_9487	CVS40_9487	KAI8119007.1	FIBA_MOUSE	0.389445	0.120735	0.5076	0.117081	0.545891	0.380347	0.765204	0.801244	0.722787
Obp56a	CVS40_5497	KAI8123862.1	OB56A_DROME	21.8025	11.6998	1.22959	47.6517	28.6508	8.90627	20.1248	7.7636	1.55631
CVS40_6080	CVS40_6080	KAI8123189.1	CUO6_BLACR	0.427014	0	0	0.240725	0.0561106	0.117292	0	0.164737	0
CVS40_1856	CVS40_1856	KAI8128879.1	ANIS6_ANISI	341.424	242.335	63.2612	319.035	126.096	43.3156	355.626	355.814	123.73
Lrp11	CVS40_3950	KAI8125754.1	LRP11_HUMAN	1.64583	0.835024	0.731303	1.68697	0.78647	0.21919	1.57491	1.6161	1.04133
CVS40_5525	CVS40_5525	KAI8123669.1	TM234_ANOGA	2.81266	3.48829	3.20775	6.34253	6.40664	2.74695	3.94748	2.41115	2.17505
hig	CVS40_2623	KAI8127584.1	HIG_DROME	3.24069	2.18688	1.67713	4.61391	2.20446	1.65231	3.39778	3.1376	1.50363
CVS40_12311	CVS40_12311	KAI8115510.1	AXE1_NEOFI	0.955243	7.1082	3.73517	6.89302	6.0254	2.09909	2.41318	3.93063	1.77287
CVS40_12652	CVS40_12652	KAI8115170.1	CADM3_MOUSE	0.293921	0.10936	0.229867	0.583255	0.308995	0.344465	0.346507	0.362827	0.38185
Akh	CVS40_7955	KAI8120890.1	AKH_DROME	2.62216	1.50094	0.39435	2.54712	1.2723	0.590978	2.03822	0.62248	1.31023
CVS40_11621	CVS40_11621	KAI8116285.1	FIRA_PLAFF	0.126183	0.117354	0.12335	0.227624	0.132649	0.277262	0	0	0
CVS40_9667	CVS40_9667	KAI8118700.1	HRS_DROME	0.0670188	0.0623443	0	0.0604348	0.070443	0.09816	0.0564236	0	0.062178
Sgce	CVS40_9788	KAI8118564.1	SGCE_RAT	5.50176	4.89973	2.63189	9.92515	7.50679	3.94418	5.52008	6.98425	3.80194
CVS40_6296	CVS40_6296	KAI8123310.1	NNRD_STRTR	0.469048	0.654432	0	0.42308	0.493104	0.0858959	0.296232	0.241258	0.108819
Cspg4	CVS40_0025	KAI8130760.1	CSPG4_RAT	0.899718	1.16233	0.732928	2.09649	1.26115	0.805474	2.18873	1.05409	0.927679
CVS40_3684	CVS40_3684	KAI8126106.1	#N/A	0	1.02096	0.536487	0.495027	0.576958	0	0.462144	0	0
CVS40_12320	CVS40_12320	KAI8115627.1	ALM1_SCHPO	0.131749	1.96088	0.386397	1.54499	0.969605	0.0965014	5.76943	1.49093	0.366802
GABBR2	CVS40_0794	KAI8129932.1	GABR2_HUMAN	1.35317	0.657511	0.256671	1.29343	1.16778	0.443808	1.05445	0.851826	0.524772
CVS40_10765	CVS40_10765	KAI8117324.1	SYFB_COREF	3.33078	2.47852	3.74438	6.45937	2.6262	3.17164	4.06694	5.65351	2.93632
CVS40_4807	CVS40_4807	KAI8124917.1	TRYP_ASTAS	0.823217	0.459433	0	0.891049	0.519262	0.361794	0.277293	0.338737	0.152779
LRIG2	CVS40_7146	KAI8121908.1	LRIG2_HUMAN	9.20999	7.55888	5.61374	15.8329	8.65715	6.50803	11.2228	10.8119	8.04386
SERPINB13	CVS40_12457	KAI8115284.1	SPB13_HUMAN	0.820993	1.697	0.62421	1.89247	0.863098	1.80408	1.4595	0.844554	0.931158
CVS40_9218	CVS40_9218	KAI8119405.1	Y3736_SHEPW	1.94256	1.80688	0	1.31414	1.02109	0	3.68053	6.99407	3.60527
CVS40_4424	CVS40_4424	KAI8125629.1	RIMK_IDILO	7.25848	3.37576	1.4191	5.89242	8.39381	3.72168	3.05611	1.49336	2.0207
CVS40_2199	CVS40_2199	KAI8128303.1	CU213_LOCMI	0.392464	0	0	0	0	0.095824	0	0	0
CVS40_4533	CVS40_4533	KAI8125174.1	#N/A	2.87505	1.9639	1.97613	4.05202	2.78637	1.11877	2.04274	3.37347	1.08386
CVS40_7402	CVS40_7402	KAI8121489.1	Y1167_LEGPH	6.09057	4.95704	5.20958	8.92724	2.4011	6.13417	1.28219	5.48219	12.7167
Msr1	CVS40_7488	KAI8121458.1	MSRE_MOUSE	0	0	0	0	0	0	0	0	0
CVS40_11178	CVS40_11178	KAI8116790.1	CUT4_CAEEL	19.3339	14.0523	24.0862	21.9814	21.0818	36.6228	16.205	23.8665	30.6254
CVS40_5346	CVS40_5346	KAI8124168.1	SKI2_HUMAN	12.4659	8.53232	5.74808	14.2143	16.8142	6.54674	8.51666	15.2432	8.73053
CVS40_1857	CVS40_1857	KAI8128878.1	AMCI_APIME	0.163309	0.303818	0	0.147311	0	0	0.412575	0	0.303104
CVS40_0124	CVS40_0124	KAI8130461.1	SPIKE_CVPRT	5984.21	4081.92	8118.21	2434.14	4686.48	8619.35	9343.89	4052.78	5803.11
Spn77Ba	CVS40_11407	KAI8116531.1	SP77B_DROME	118.719	99.3554	43.6347	169.103	95.1699	64.1295	98.916	76.0469	45.7821
CVS40_12415	CVS40_12415	KAI8115410.1	TXG1A_SCODE	11.1224	12.2976	2.87201	10.7895	3.08867	1.69087	11.3098	13.1686	6.03696
CVS40_1931	CVS40_1931	KAI8129001.1	PMM_YEAST	0.639342	4.16282	0.468738	2.30674	0.840164	0.351228	2.82648	4.93268	1.03826
CVS40_3150	CVS40_3150	KAI8126962.1	CUT4_CAEEL	176.569	129.89	84.4174	269.834	152.333	116.922	177.419	174.184	122.97
CVS40_8580	CVS40_8580	KAI8120203.1	ESM1_DROME	110.311	67.3835	35.4082	131.677	75.5815	44.6212	91.9667	102.186	54.4931
CVS40_12924	CVS40_12924	KAI8114750.1	PAN1_PICST	5.44953	6.70405	2.92134	5.39115	10.1644	5.92311	7.99365	5.78676	1.95755
CVS40_12290	CVS40_12290	KAI8115692.1	FIB37_BPT2	2.99068	1.987	2.08823	1.15611	1.34745	3.12944	2.15862	2.1975	1.58586
CVS40_6684	CVS40_6684	KAI8122554.1	SDEA_LEGPH	2345.76	1094.81	82.4849	1729.23	1082.87	333.53	1292.16	2029.57	525.62
CVS40_1775	CVS40_1775	KAI8128917.1	G12_ANOGA	1.68059	0.977009	0	1.80012	0	0.692437	1.2383	0	0
CVS40_8902	CVS40_8902	KAI8119710.1	L_SBVBH	1.75588	2.35913	2.09788	2.81565	1.43572	0.142895	0.985729	0.802787	0.36209
pac	CVS40_2296	KAI8128111.1	PAC_STRMG	0	0	0	0.137146	0	0.334089	1.15224	0.312798	0.141075
CVS40_4302	CVS40_4302	KAI8125302.1	CCD14_MOUSE	34.3737	23.0502	5.99101	32.6874	16.8077	8.0023	32.7599	23.8475	9.39623
CVS40_11158	CVS40_11158	KAI8116838.1	SYS_STRPZ	6.96228	12.6705	0.88773	11.4678	5.72818	3.99109	6.62752	5.91651	4.49446
CVS40_8858	CVS40_8858	KAI8119826.1	LECA_SARPE	10.7055	7.74492	10.1744	13.4115	5.62725	2.61384	6.26032	15.6013	10.2103
CVS40_7842	CVS40_7842	KAI8121029.1	RS1_RICBR	7.30712	30.4236	2.04086	13.182	1.82902	0.254872	5.56717	1.78972	0.968684
CVS40_7084	CVS40_7084	KAI8122175.1	CASP4_HUMAN	1.05842	0.546944	1.37954	0.954695	1.97814	1.20598	0.693216	1.45173	1.96437
CTGF	CVS40_9695	KAI8118738.1	CCN2_HUMAN	0.922866	0.590157	0.338303	1.04053	0.970196	0.422488	0.679988	0.356007	0.374672
CVS40_7339	CVS40_7339	KAI8121710.1	MURG_SHEDO	812.827	703.379	581.781	1404.31	753.514	641.305	741.523	832.513	688.588
CVS40_6928	CVS40_6928	KAI8121980.1	ATSL_BOMMO	10.6438	9.37929	6.0238	17.3485	9.91362	7.45438	16.3534	11.2374	10.0504
CVS40_4547	CVS40_4547	KAI8125426.1	IF2_CAUVC	7.04945	4.47075	0	4.3354	7.74785	0.704124	7.28535	4.28513	1.1894
nas-14	CVS40_0249	KAI8129946.1	HE12_DANRE	1.61216	1.15351	1.09104	2.57275	1.95558	0.817525	1.98413	2.04113	1.15079
CVS40_8132	CVS40_8132	KAI8120607.1	Y1552_DROME	5.16472	1.51705	0.265718	3.43263	1.42884	1.19465	1.83121	3.07591	0.252258
CVS40_10872	CVS40_10872	KAI8117314.1	SYT_NATPD	0.324278	0.301629	0	0	0.170443	0	0	0	0.45138
CVS40_1899	CVS40_1899	KAI8128708.1	MYO1_EMENI	0	2.94324	0	0	0	0.77258	0	2.17003	0
CVS40_10179	CVS40_10179	KAI8118063.1	OBP67_ANOGA	4.35869	1.66329	1.20177	3.72991	4.81722	2.04657	6.68196	4.82869	1.24453
Sp7	CVS40_1093	KAI8129632.1	SER7_DROME	135.649	105.034	30.4469	147.087	78.6355	45.9804	109.063	79.049	39.058
CVS40_7554	CVS40_7554	KAI8121279.1	KALM_CHICK	28.5272	21.2861	18.0803	57.1181	40.2066	27.7842	55.9638	30.6358	27.636
MMEL1	CVS40_0159	KAI8130249.1	MMEL1_MOUSE	20.0194	23.2915	21.3318	20.1477	16.3091	14.3337	20.0019	15.76	23.4159
Acp1	CVS40_4732	KAI8124974.1	CUA1_DROME	106.246	45.1834	2.60193	71.2253	51.767	10.8855	43.1464	73.9285	27.9932
CVS40_11063	CVS40_11063	KAI8116960.1	PLCE1_CAEEL	12.5519	10.6138	1.64383	11.3218	6.75564	1.93557	7.93992	4.63353	2.06204
CVS40_6683	CVS40_6683	KAI8122547.1	FP1V2_PERVI	2202.67	961.112	75.5025	1491.48	1033.79	343.931	1065.62	2092.92	604.855
CVS40_7398	CVS40_7398	KAI8121533.1	U90_HHV6Z	0	0.54758	1.15095	0.531003	0	0	0	0	0
spz4	CVS40_10257	KAI8117998.1	SPZ4_DROME	0	0	0	0	0.145971	0	0	0	0
CVS40_12315	CVS40_12315	KAI8115711.1	AXE1_NEOFI	0.572066	0	1.11844	0.516003	0	0	0	0	0.530861
CVS40_2214	CVS40_2214	KAI8128044.1	TRIN_SULTO	0.16345	0	0.319554	0.147418	0	0	0.688181	0	0
sgne1	CVS40_5099	KAI8124442.1	7B2_DROME	17.9474	17.9398	10.998	24.8869	13.2357	8.04464	19.6246	19.2892	11.186
CVS40_11464	CVS40_11464	KAI8116470.1	BIOC_SHEON	3.48695	2.37019	0.393306	2.90328	0.986942	1.17882	2.14576	2.06944	0.248914
CVS40_6887	CVS40_6887	KAI8122060.1	NUCG_HUMAN	1996.53	1635.04	1384.86	726.227	1626.94	2277.64	1630.48	4359.42	3006.33
CVS40_11059	CVS40_11059	KAI8116956.1	FAB1_YEAST	141.287	102.255	30.1455	139.428	76.2334	42.152	108.49	116.074	50.5882
CVS40_10387	CVS40_10387	KAI8117833.1	EBNA6_EBVG	0.117283	0	0.0573336	0	0	0.0429596	0	0	0.0544238
CVS40_8544	CVS40_8544	KAI8120142.1	RETIN_DROME	22.9538	11.364	0.603181	16.5857	10.7681	4.15809	83.6548	53.6994	11.4518
CVS40_0241	CVS40_0241	KAI8129942.1	KDIS_HUMAN	1.08877	1.01273	1.06432	1.4731	1.14461	0.398751	1.83367	3.36005	2.0207
CVS40_11988	CVS40_11988	KAI8115862.1	SORC2_MOUSE	0.203628	0.0946911	0.497647	0.642863	0.321112	0.447467	0.514423	1.04738	1.13378
CVS40_3281	CVS40_3281	KAI8126893.1	ARFN_ARATH	85.4524	65.2848	50.1947	135.598	84.8745	62.2871	91.0649	104.072	75.8202
CVS40_5674	CVS40_5674	KAI8123792.1	ZAN_MOUSE	1.20032	0.956989	0.775261	1.74003	0.923878	0.785009	1.55225	1.45526	2.18795
Cacna2d3	CVS40_7576	KAI8121435.1	CA2D3_MOUSE	0	0	0	0	0	0	0	0.777326	0
CVS40_7528	CVS40_7528	KAI8121335.1	MS300_DROME	0	0.0462998	0	0.0449058	0.0523342	0.0364654	0.0419206	0.0512176	0
CVS40_4478	CVS40_4478	KAI8125259.1	USH2A_MOUSE	0.252818	0.156777	0.329528	0.456092	0.354386	0.185177	0.283854	0.520158	0
CVS40_0071	CVS40_0071	KAI8130544.1	ASPP_AEDAE	0.714326	1.49498	0.349143	0	0.375481	0.784843	0.150384	0	0
Ama	CVS40_9062	KAI8119835.1	AMAL_DROME	6.88815	2.92894	0.577154	5.32551	4.96554	2.30648	5.96611	5.06131	2.19154
CVS40_7950	CVS40_7950	KAI8120895.1	HMU_HALWD	0.194078	0	0.474279	0.350101	0.510056	0	0.571978	1.29765	1.53077
CVS40_3250	CVS40_3250	KAI8126679.1	PYRG_PHYAS	0	0.263817	0.554521	0.511667	0.298176	0.207743	0.238844	0	1.316
VG1-GAMMA	CVS40_5426	KAI8124044.1	VIT1_CERCA	0.877306	0.589356	6.05088	0.263778	0.204966	0.178496	0.369382	0.75207	0.768886
CVS40_4687	CVS40_4687	KAI8124781.1	VPS16_CAEBR	0	0	0	0	0	0	0	0.129566	0
SULT1C4	CVS40_2091	KAI8128219.1	LST_PHOPY	4.67085	5.93622	4.29472	6.09022	5.93138	4.06491	6.58136	4.42431	4.46316
Ids	CVS40_3561	KAI8126145.1	IDS_MOUSE	1.16386	0.463959	0.325064	1.0498	0.436982	0.791609	0.840055	0.256545	0.925737
cn	CVS40_1639	KAI8128758.1	KMO_DROME	0	0	0	0	0	0	0.481726	0	0
CVS40_8839	CVS40_8839	KAI8119656.1	FRIS_LYMST	0.542926	1.08216	0.530734	0.909477	0.326155	0.284059	0.261261	0.398934	0.503819
CVS40_2496	CVS40_2496	KAI8128012.1	PTTH_CAMFO	0.273302	0	0.534315	0	0	0.200174	0.230137	0	0
CVS40_3214	CVS40_3214	KAI8126660.1	AB19B_ARATH	0.390196	1.08883	0	0	0.410207	0.28581	1.31431	0.401394	0.36209
CVS40_1026	CVS40_1026	KAI8129838.1	CL43_BOVIN	138.666	172.036	123.654	189.684	260.721	118.522	299.9	299.247	117.383
Glra2	CVS40_2068	KAI8128706.1	GLRA2_HUMAN	0.433087	0.72511	0.16934	0	0.546358	0.19034	0.145884	0.356413	0.0803674
CVS40_11989	CVS40_11989	KAI8115861.1	SPHX_SYNE7	0.264204	0.368625	0.258267	0.119162	0.277758	0	0.111229	0.2718	0.98069
CVS40_5147	CVS40_5147	KAI8124732.1	OBP66_ANOGA	0.466616	0	0.152059	0.140294	0.163515	0	0.130969	0.320005	0.144333
CVS40_0338	CVS40_0338	KAI8130817.1	GLH2_CAEEL	0.173989	0	0.0566894	0.20924	0.243859	0.169923	0.439513	0.0596523	0.107637
CVS40_9776	CVS40_9776	KAI8118650.1	ANR11_HUMAN	76.9838	54.5794	36.9085	83.445	41.4111	38.7899	85.6097	69.7774	38.0703
Col11a1	CVS40_10991	KAI8117069.1	COBA1_RAT	1.75924	0	0	0	0	0.097249	0.391319	0.614624	1.3861
CVS40_8643	CVS40_8643	KAI8120045.1	CATL_SARPE	27.6991	60.1173	5.81657	32.4799	18.8739	17.7341	81.7237	30.6047	20.3728
HPSE2	CVS40_0404	KAI8130575.1	HPSE2_HUMAN	0.382699	0.118643	0	0.0575264	0.0670532	0	0.161122	0	0
mthl9	CVS40_3686	KAI8126108.1	MTH9_DROME	29.9737	24.4245	23.6375	41.5767	32.3053	25.1377	32.823	33.8784	32.022
CVS40_2193	CVS40_2193	KAI8128297.1	AMPP2_BOTFB	0.89409	0.831644	2.62204	0	0.469972	0.654902	1.88224	0.459875	1.65938
CVS40_4690	CVS40_4690	KAI8124984.1	ATPG_LACGA	11.1439	11.7059	2.15995	3.98605	0.80796	0.492575	11.1638	2.86593	1.60467
CVS40_2277	CVS40_2277	KAI8128055.1	DYHC2_PLAF7	82.8203	51.4066	39.7018	74.0572	53.9988	39.4317	74.905	104.203	87.0528
CVS40_7852	CVS40_7852	KAI8121065.1	APOE_ALLMI	0.983065	3.35282	0	0.591149	0	0.48005	0.551881	2.35965	0.60817
CVS40_7216	CVS40_7216	KAI8121859.1	MYORG_MOUSE	1.24622	0.772789	0.60912	1.12409	1.20096	1.36925	1.74904	0.640995	1.73469
CVS40_1211	CVS40_1211	KAI8129575.1	ESTJ_TRICA	2.04467	1.90187	1.73805	2.72634	1.7757	1.82326	5.6145	3.4751	2.30987
CVS40_7749	CVS40_7749	KAI8121187.1	CU01_ANOGA	231.442	276.304	329.519	344.361	279.971	185.041	467.003	1121.33	477.722
CVS40_8123	CVS40_8123	KAI8120640.1	LA1D_UROYA	664.025	607.898	796.197	672.175	477.525	765.098	595.064	858.146	1321.08
ARSJ	CVS40_4584	KAI8125037.1	ARSJ_HUMAN	4.2331	2.44122	1.9035	4.12371	3.47115	2.48052	4.634	4.87713	3.84963
CVS40_7118	CVS40_7118	KAI8121807.1	SPF27_XENTR	66.2163	57.2801	6.58081	28.6689	19.8395	7.67949	40.7974	26.1114	9.62666
CVS40_9950	CVS40_9950	KAI8118318.1	S401_ARATH	1.05096	0.827162	1.10638	1.31256	1.61479	1.18431	0.748839	1.41377	0.975258
CVS40_12466	CVS40_12466	KAI8115279.1	#N/A	40.2803	39.2371	44.8015	65.7994	56.6837	41.4689	54.8851	51.7138	46.6501
CVS40_2979	CVS40_2979	KAI8127611.1	POL_SIVCZ	0	0.305419	0.401224	0.592347	0.517789	0.420895	1.3825	0.675552	0.228534
CVS40_9488	CVS40_9488	KAI8118999.1	DPP7_POREA	14.1972	9.71737	3.92785	8.93995	5.91382	4.12043	10.8274	23.147	8.94879
PLOD1	CVS40_3456	KAI8126583.1	PLOD_DROME	191.398	174.471	69.5501	134.431	81.8836	65.4597	136.778	117.797	68.7282
CVS40_7780	CVS40_7780	KAI8120995.1	LON_CLOB8	1.84581	0.49054	4.12425	1.66492	2.49489	2.1246	4.21887	2.17003	3.9151
CVS40_0753	CVS40_0753	KAI8130239.1	YEDE_ECOLI	7555.56	7184.5	11541.1	7375.65	7382.64	9732.53	11259.2	9822.69	20631
CVS40_11316	CVS40_11316	KAI8116634.1	K0754_HUMAN	2.13832	0.935987	0.737753	1.13457	0.793407	1.28987	0.74144	2.45847	1.75085
CVS40_7401	CVS40_7401	KAI8121492.1	NFRA_ECOLI	3.09515	6.9918	9.94142	8.7743	6.50778	9.06854	2.60637	3.63884	9.43727
CVS40_2463	CVS40_2463	KAI8128197.1	LECA_SARPE	0.372949	0.693803	1.09372	1.0092	1.17623	0.819533	3.45459	0.767305	2.76869
CVS40_7847	CVS40_7847	KAI8121060.1	RLMN_KLEP3	106.569	122.381	22.3015	44.5387	17.4129	8.69868	66.0545	52.4023	17.6904
TXNDC11	CVS40_5845	KAI8123569.1	TXD11_HUMAN	34.47	28.7672	30.0456	28.76	36.0365	21.6016	30.8004	35.2623	21.4136
COL21A1	CVS40_1022	KAI8129836.1	COLA1_HUMAN	33.4605	28.4419	4.20413	11.6377	8.59539	4.22332	32.196	23.5792	7.23631
tmx3	CVS40_11054	KAI8116977.1	TMX3_XENLA	13.5008	16.0221	7.12973	14.6972	9.13583	12.0487	12.6755	10.2166	5.47214
CVS40_3018	CVS40_3018	KAI8127564.1	CU01_BLACR	5.58485	1.80688	0	1.53316	0.765818	1.60074	23.5145	14.4877	2.92928
CVS40_4321	CVS40_4321	KAI8125404.1	GLMM_DESPS	8.59297	8.92704	8.25455	8.52258	5.39674	4.38685	7.70585	8.68652	6.6968
anon-3B1.2	CVS40_3485	KAI8126556.1	CCCP_DROME	0.513989	0.717135	0	1.62266	0.945611	0.188237	0.541025	0.396555	0.119254
atpaf1	CVS40_0200	KAI8130801.1	ATPF1_DANRE	28.7	29.984	24.8535	43.8959	40.0652	29.172	39.4914	33.535	18.6236
Zan	CVS40_0376	KAI8130727.1	ZAN_MOUSE	0	0	0	0	0.666793	0	0	0	0
Adgrg4	CVS40_0267	KAI8130449.1	AGRG4_MOUSE	14.4523	14.2337	13.8216	15.5382	18.9801	13.1916	15.3538	17.3756	11.5636
Yp3	CVS40_5427	KAI8124045.1	VIT3_DROME	89.7601	90.3753	62.6526	92.1847	63.7368	51.3291	90.3046	96.71	59.9138
CVS40_0755	CVS40_0755	KAI8130237.1	AC150_NPVAC	59058.4	61888	72824.6	42531.5	54608.6	65639.8	84291.7	69970.7	118685
CVS40_7404	CVS40_7404	KAI8121493.1	INT13_DROPS	3.40928	0.634234	5.33236	1.23007	0	0.998891	1.14836	1.40285	3.16371
CVS40_5540	CVS40_5540	KAI8123945.1	TRYP_SARBU	1267.28	1152.26	907.896	950.772	1248.61	1223.12	2357.1	3313.92	1362.29
CVS40_1870	CVS40_1870	KAI8128827.1	SSP_BOMIG	642.71	630.073	753.867	404.764	651.371	543.651	588.184	589.129	779.211
CVS40_5933	CVS40_5933	KAI8123585.1	GLT25_DROPS	73.3218	71.3201	25.7048	52.0427	35.5764	23.1687	63.9893	63.5084	27.584
Cg25C	CVS40_4015	KAI8125835.1	CO4A1_DROME	1430.78	1375.34	284.857	719.127	424.275	240.648	1361.72	1269.24	454.275
CVS40_1853	CVS40_1853	KAI8128882.1	AMCI_APIME	1.46323	0.544414	0.286075	0.263965	0	0	0	0.301033	0.271571
yellow-f2	CVS40_8995	KAI8119844.1	YELF2_DROME	27.0376	26.6267	9.04334	18.5782	12.1661	8.57896	16.8003	14.5263	7.58048
CVS40_12292	CVS40_12292	KAI8115528.1	#N/A	34.1228	44.8494	58.0114	37.4697	37.4325	48.9018	43.1013	16.0249	70.2136
P4HA2	CVS40_8818	KAI8119771.1	P4HA2_CHICK	10.0858	7.10713	8.06674	4.466	5.46221	6.85038	6.07385	4.77892	4.42443
wg	CVS40_4299	KAI8125212.1	WNTG_DROME	11.3392	8.02031	11.3733	9.37563	8.07135	11.1608	9.44909	11.4824	13.5915
Wnt4	CVS40_4296	KAI8125213.1	WNT4_DROME	3.00617	2.74243	4.0124	3.49373	3.03879	1.94788	2.38539	2.49774	2.14587
CVS40_7840	CVS40_7840	KAI8121031.1	LRRK2_MOUSE	8.42734	15.6775	2.74603	3.4552	0.536942	0.187046	2.3655	0	0.473959
CVS40_9450	CVS40_9450	KAI8119156.1	TSEP_GLOPP	0.569653	2.91426	0.55686	0.770738	0.598868	0.208631	10.0736	1.758	3.17172
CVS40_1325	CVS40_1325	KAI8129292.1	K0754_HUMAN	88.6081	82.141	14.1925	34.5619	25.9631	9.09966	34.1566	44.1898	15.6951
GNBP2	CVS40_10853	KAI8117283.1	BGBP2_DROME	10.9614	6.37237	2.81275	5.31434	4.17728	2.30833	7.61506	5.35608	2.54296
CVS40_0527	CVS40_0527	KAI8130107.1	POI_MUSDO	159.506	139.265	100.761	163.988	113.386	149.002	111.133	105.332	97.9742
CVS40_6119	CVS40_6119	KAI8123325.1	GCS2_LARHH	26.8227	20.3753	26.6574	32.6619	22.0887	21.9392	31.6217	53.8054	53.1001
CVS40_0744	CVS40_0744	KAI8130755.1	TSP4_BOVIN	5206.51	4760.83	8592.27	8715.21	6287.34	5662	7384.49	11433.9	11793.8
CVS40_3617	CVS40_3617	KAI8126274.1	IF2_DESVH	23.2783	23.6969	28.9084	24.6016	24.1571	30.0037	32.4741	26.5157	34.7665
CVS40_1558	CVS40_1558	KAI8129396.1	CCNB2_ORYJA	28.5299	28.4328	7.96836	11.9479	4.82032	3.91829	33.0337	18.3429	8.27341
CVS40_7782	CVS40_7782	KAI8120997.1	EGFL8_MOUSE	7.14204	4.92884	4.05387	4.77963	2.90645	4.38762	6.40219	6.63601	4.70346
CVS40_7843	CVS40_7843	KAI8121030.1	Y309_MYCGE	12.7542	24.3055	6.08184	5.61183	0.981094	0.683573	16.765	9.92016	4.33006
CVS40_1907	CVS40_1907	KAI8128649.1	CBPA1_ANOGA	111.06	107.479	42.5776	72.3639	47.0483	33.7674	101.462	98.0798	44.3074
CVS40_0612	CVS40_0612	KAI8130394.1	TRUD1_METMP	8.96392	10.3798	8.22614	8.25045	5.38494	4.15393	8.16455	9.03299	9.8461
Sod3	CVS40_2709	KAI8127401.1	SODE_DROME	70.2468	62.7269	35.708	79.4747	61.1896	48.073	73.0124	47.074	44.5134
PGRP-SD	CVS40_10446	KAI8117707.1	PGPSD_DROSI	80.7868	66.0299	59.1763	47.3358	66.3874	42.9056	44.3748	62.945	52.5381
CVS40_8577	CVS40_8577	KAI8120174.1	CAF4_YEAS7	702.746	740.324	969.459	819.057	1049.04	941.228	994.374	947.307	1468.54
CVS40_11473	CVS40_11473	KAI8116460.1	PE1_ANOGA	4495.42	4804.95	5986.47	4598.77	4108.09	5467.69	7095.14	7921.52	12778.9
CVS40_7849	CVS40_7849	KAI8121062.1	EX7S_OCEIH	96.8533	45.4994	5.10052	20.8844	8.22792	2.14979	21.694	9.05754	6.05232
CVS40_8579	CVS40_8579	KAI8120169.1	IL36B_HUMAN	2.00506	1.11901	0.784015	0.361713	0.843158	0.587467	0.337685	0.412521	1.86064
CVS40_7136	CVS40_7136	KAI8121793.1	VKT11_HOFGE	17.0082	9.91407	8.42399	10.8413	7.86743	5.14938	8.5934	7.6984	6.5237
CVS40_4609	CVS40_4609	KAI8125167.1	SECP_VESMG	260.715	215.436	92.9697	163.451	98.0905	90.7593	186.447	192.583	145.328
CVS40_2884	CVS40_2884	KAI8127136.1	Y456_MYCPN	5.74131	5.34031	2.21094	3.45243	2.37772	1.40179	2.49058	2.50561	1.13013
zetaTry	CVS40_2121	KAI8127822.1	TRYZ_DROER	67.2184	63.2537	57.5476	47.7581	61.5137	45.316	70.3035	74.7263	53.2387
TGFBI	CVS40_7631	KAI8121149.1	BGH3_BOVIN	2.99841	2.65618	2.51235	2.96213	2.35163	1.63849	3.28638	1.95839	1.76662
CVS40_7384	CVS40_7384	KAI8121474.1	ATX2_ARATH	994.711	966.999	1080.72	906.377	865.809	1099.17	798.08	1145.97	1062.7
CVS40_2580	CVS40_2580	KAI8127829.1	CTR1_SOLIN	675.346	661.721	574.774	758.604	908.265	672.4	671.197	733.437	475.684
CVS40_0756	CVS40_0756	KAI8130236.1	EIF3K_USTMA	3.41373	5.53118	2.0453	1.19194	1.15768	2.09718	2.50372	1.58593	0.919697
CVS40_10910	CVS40_10910	KAI8117157.1	BH049_ARATH	315.206	314.471	442.313	419.9	455.369	297.043	320.798	426.409	379.938
CVS40_5982	CVS40_5982	KAI8123503.1	SP4_BOMPE	5.93592	3.59529	1.88923	5.0429	4.7891	3.4379	2.44114	3.69217	3.39469
CVS40_1522	CVS40_1522	KAI8129805.1	SGK3_HUMAN	0.823217	2.29716	1.34122	0.742541	0.288492	0.200992	85.0345	12.7026	4.32889
CVS40_7834	CVS40_7834	KAI8121023.1	ASF1A_BOVIN	0.143107	0.532487	0.419711	0	0	0.104841	0.241021	0.147228	0.398427
tenm3	CVS40_12654	KAI8115173.1	EGFLR_HOLDI	4.18989	3.17554	4.2475	3.6393	4.56792	3.18267	1.82945	3.83123	2.16005
CVS40_10112	CVS40_10112	KAI8118104.1	LA1_PANCV	2.63818	2.80448	0.614032	0.566579	0.264139	0.920195	2.22156	2.58466	1.39894
CVS40_9208	CVS40_9208	KAI8119276.1	TRY1_BOVIN	220.635	225.308	20.9518	64.8212	90.9578	30.3597	35.566	33.7208	9.65216
CVS40_5511	CVS40_5511	KAI8123903.1	LYS1B_LUCSE	0	3.13946	3.2994	0	0	0.618064	1.42109	0	0.783019
CVS40_11636	CVS40_11636	KAI8116257.1	AG5L1_CULNU	502.324	413.882	381.585	285.924	358.491	405.871	840.391	941.707	447.048
Kaz-m1	CVS40_1481	KAI8129439.1	ESM1_DROSI	871.028	942.879	946.776	908.945	1104.84	1076.55	998.14	959.767	1056.96
CVS40_7406	CVS40_7406	KAI8121510.1	JZ13B_CHIGU	0.713069	3.31633	4.87939	1.92956	0.749639	1.04462	0	0.733533	0.661707
CVS40_7546	CVS40_7546	KAI8121307.1	CBPB_HELZE	118.594	145.791	171.659	134.246	141.883	165.811	537.173	146.54	72.2094
Rfabg	CVS40_11147	KAI8116851.1	APLP_DROME	1889.01	2192.94	323.266	731.069	380.642	177.558	1243.65	1410.09	450.716
CA6	CVS40_7983	KAI8120946.1	CAH6_HUMAN	8.56042	5.94219	1.99837	7.49099	6.04441	4.77294	5.59471	2.89155	4.14976
CVS40_1874	CVS40_1874	KAI8128823.1	SSP_BOMIG	17762.9	17094.4	19148.8	11252.2	16036.2	14454	14043.8	13011.5	11750.2
CVS40_12432	CVS40_12432	KAI8115449.1	Y4080_STRGG	0.439287	1.63442	0.143152	0.264152	0.15394	0	0.369916	0.451894	0.67941
LRPAP1	CVS40_8974	KAI8119731.1	AMRP_HUMAN	7.24163	6.4995	5.09192	7.26534	5.04864	4.85766	5.84128	6.16867	4.76296
Lsp1gamma	CVS40_7031	KAI8122006.1	LSP1G_DROME	35.4671	27.4346	5.47904	9.61395	9.85279	3.16323	0.696361	1.98493	1.62004
CVS40_4542	CVS40_4542	KAI8125429.1	CERS4_MOUSE	10.0201	12.754	5.67084	6.65966	4.98978	7.7258	6.21728	8.68014	5.87265
CVS40_12312	CVS40_12312	KAI8115716.1	AXE1_NEOFI	5.71605	3.03818	9.5789	4.41931	2.57537	4.18689	4.12575	4.20007	3.03104
CVS40_4027	CVS40_4027	KAI8125823.1	MRC1_MOUSE	82.9656	88.3959	87.0009	95.2443	65.019	82.5927	72.0867	81.8552	97.9868
Chia	CVS40_1695	KAI8128834.1	CHIA_RAT	5787.99	3697.35	3898.25	992.119	1084.9	2143.05	3682.16	2536.37	5717.8
TNXB	CVS40_7773	KAI8121015.1	TENX_HUMAN	0.260192	0.64537	0	0.0782317	0	0.127057	0.0730447	0.178439	0.0804827
ACE	CVS40_3112	KAI8126942.1	ACE_HUMAN	52.7036	48.5046	10.5416	19.1798	10.6981	6.67509	53.9305	36.3003	15.5977
UGT2B14	CVS40_1041	KAI8129255.1	UGT2_DACCO	28.3535	31.0191	18.4473	29.0299	31.0512	21.7999	35.2447	19.6251	12.0056
Prss42	CVS40_8080	KAI8120720.1	PFAF2_GALME	0.850378	0.790985	0.118756	0.876617	0.638565	0.711867	2.55746	0.374907	0.338197
CVS40_0746	CVS40_0746	KAI8130757.1	PE55_LUCCU	20128.3	21521.1	30210.1	27199.6	26196.4	30559.7	27039.4	36962.7	48813.7
PNLIPRP2	CVS40_3251	KAI8126610.1	LIPR2_CAVPO	4.77568	5.49978	6.8915	5.94866	3.58615	4.7474	5.26626	4.56182	3.79859
CVS40_4315	CVS40_4315	KAI8125521.1	LAMA2_MOUSE	8.9142	9.35816	2.71183	4.73761	3.57746	2.05908	9.31303	5.78359	3.43241
Plb1	CVS40_5934	KAI8123578.1	PLB1_HUMAN	23.4074	25.0033	26.8676	15.3924	17.3049	36.835	20.0924	22.2149	36.1555
CVS40_10923	CVS40_10923	KAI8117144.1	Y1130_ARATH	30.1613	34.5674	32.643	21.5376	29.632	20.383	23.4329	18.4684	13.328
CVS40_12295	CVS40_12295	KAI8115615.1	RR2_GALSU	1.92868	0	2.82806	4.34917	4.05519	4.23815	4.06027	0.992016	17.8976
CVS40_2414	CVS40_2414	KAI8127895.1	TX52A_ETHRU	1331.73	1317.83	1211.65	1075.77	1435.59	1192.4	1358.18	1359.04	961.721
CVS40_7470	CVS40_7470	KAI8121488.1	GP1BA_MOUSE	25542.7	28759.8	34578.2	23838	26022.8	30188.3	34717.4	33932.8	43795.1
CVS40_2848	CVS40_2848	KAI8127052.1	TX51A_ETHRU	45.231	51.4425	61.4994	37.2748	44.7409	50.2985	54.3622	53.2969	69.0647
CVS40_0112	CVS40_0112	KAI8130022.1	PE55_LUCCU	35010.3	40979.1	50008.9	44529.2	45646.7	51599.8	49480.4	43778.5	48789.4
CVS40_10702	CVS40_10702	KAI8117390.1	VA5_POLAN	57.177	49.1577	42.7548	84.0382	50.5901	84.7214	32.9457	63.036	45.9771
CVS40_1657	CVS40_1657	KAI8128789.1	SEPH_EMENI	0.419278	0.779989	0	0.378188	0.440782	0.307113	0	1.29393	0.389078
CVS40_7844	CVS40_7844	KAI8121033.1	APOA4_HUMAN	132.706	130.038	16.497	44.9743	28.6283	11.9399	80.7439	66.8765	20.8212
CVS40_10593	CVS40_10593	KAI8117538.1	YIW2_SCHPO	153.941	172.758	107.579	105.815	139.274	99.2842	125.147	132.796	88.1973
CVS40_10963	CVS40_10963	KAI8117084.1	FAS3_DROME	0	0	0	0	0	0	0	0	0
CVS40_2226	CVS40_2226	KAI8128352.1	GSM1_ASHGO	4.51722	4.49762	4.2292	5.5666	4.28069	5.21947	4.23247	4.25417	7.49809
CVS40_2341	CVS40_2341	KAI8128259.1	RESIL_DROME	4.16237	3.83966	3.12734	3.07182	3.86955	2.82208	3.79473	4.38799	2.36223
ACHE	CVS40_0781	KAI8130519.1	ESTJ_TRICA	0	0	0	0	0	0	0	0	0
CVS40_12298	CVS40_12298	KAI8115697.1	PFKA2_ASPOR	37.9032	29.2121	40.2279	33.2118	22.7698	20.6242	15.5028	30.0788	48.2373
CVS40_2594	CVS40_2594	KAI8127068.1	LYS_BOMMO	80.9634	77.7998	59.2079	68.1974	80.5675	57.4932	72.8617	72.9026	46.0731
CVS40_7028	CVS40_7028	KAI8122119.1	GATB_USTMA	3.95207	3.79462	3.55176	4.54219	4.82487	3.4084	6.49489	3.14747	3.96316
CVS40_11299	CVS40_11299	KAI8116644.1	K0754_HUMAN	124.635	118.311	79.0161	135.338	100.299	96.457	119.647	103.534	74.0586
CVS40_7403	CVS40_7403	KAI8121490.1	ADH2_YEAST	2.32105	3.77814	5.67232	3.66377	3.05011	2.12515	4.39765	2.38766	3.2308
CVS40_12458	CVS40_12458	KAI8115261.1	ML1P_MANSE	218.055	182.997	38.6377	69.3005	39.218	20.819	153.702	196.902	58.1083
CVS40_7835	CVS40_7835	KAI8121022.1	SMG1_CAEEL	1.48311	1.50493	2.1088	0.729687	1.13394	0.69131	0.454144	1.10958	1.62651
CVS40_10096	CVS40_10096	KAI8118228.1	CTR1_SOLIN	1.53918	3.2724	0.859778	0.595	0	0.322118	7.40635	1.58335	0.612132
MP1	CVS40_0149	KAI8130999.1	GRASS_DROME	0	0	0.0563253	0	0	0	0	0	0.0534725
NBEAL1	CVS40_11034	KAI8116988.1	NBEL1_HUMAN	0	0	0	0	0	0	0	0	0
gol	CVS40_5450	KAI8123803.1	GOLI_DROME	54.4165	54.0423	51.5536	57.9161	54.4131	63.3576	59.252	47.2481	56.9875
PLA2G15	CVS40_10279	KAI8117909.1	PAG15_HUMAN	38.019	43.2335	31.0426	40.9336	40.0843	28.5725	38.3071	40.8056	25.4917
CVS40_10710	CVS40_10710	KAI8117379.1	KIFC1_MOUSE	39.736	30.4442	23.2741	40.7294	29.2302	30.8698	36.9638	33.9511	28.1379
CVS40_1868	CVS40_1868	KAI8128491.1	SSP_BOMIG	30.3179	36.9616	20.1417	25.4881	18.5666	14.8767	59.2398	30.8851	39.6062
CVS40_3272	CVS40_3272	KAI8126589.1	RH2A_PLAF7	2378.87	1420.31	1734.34	1389.13	1638.5	1736.21	1838.43	5933.55	2537.64
CVS40_7798	CVS40_7798	KAI8121096.1	GSA_SULAA	9661.19	10364.4	6990.98	7952.62	10048.2	8602.22	23696	18856.7	11962.3
CVS40_3797	CVS40_3797	KAI8125997.1	LECA_SARPE	12.4138	15.3382	2.53568	0.835613	3.70087	1.9	6.39687	1.90598	2.23515
CVS40_5256	CVS40_5256	KAI8124248.1	PA2B_PSEAU	1008.44	726.657	738.102	1103.64	936.647	748.952	2027	2833.55	1217.46
CVS40_8285	CVS40_8285	KAI8120466.1	PYRF_ROSCS	34.8495	31.6498	26.8244	39.6022	28.2709	31.5564	33.5054	41.213	33.1033
CVS40_0864	CVS40_0864	KAI8130883.1	GTRP_LOTGI	7.70805	2.28127	1.19874	2.52823	3.31501	2.43804	2.80285	2.52295	1.95078
KDSR	CVS40_1450	KAI8129062.1	TRY4_ANOGA	0	0	0	0	0	0	0	0	0
CVS40_8122	CVS40_8122	KAI8120605.1	LA1D_UROYA	1826.44	1703.79	1002.02	1236.67	880.346	716.369	1736.83	2339.93	1604.48
CVS40_7846	CVS40_7846	KAI8121059.1	LNBB_BIFB1	54.631	54.3199	9.51454	12.4609	2.97066	2.75973	48.3833	30.6833	7.2839
CVS40_6578	CVS40_6578	KAI8122517.1	OGG1_MOUSE	8.48409	6.51909	10.0965	12.3108	12.4093	9.45672	6.21243	7.58919	20.1959
PGRP-SA	CVS40_9602	KAI8118934.1	PGPSA_DROME	71.756	52.1242	30.2847	48.286	40.7116	29.7004	42.5848	35.6188	33.8222
TPBG	CVS40_1168	KAI8129216.1	TPBG_MACFA	28.6702	29.6308	24.6157	29.418	25.1969	30.7782	31.4237	30.1172	24.7751
ESR16	CVS40_8967	KAI8119560.1	ES16_MANSE	42.4947	39.0924	27.6936	60.0927	46.3105	49.2551	68.9465	50.2794	58.7897
CVS40_12439	CVS40_12439	KAI8115448.1	PYR8_ASPFU	11309.2	11502.9	16523.5	12245.3	14073.3	14174.2	19229	16880.4	27818.9
fgf17	CVS40_5673	KAI8123785.1	FG17_DANRE	10.2214	10.8657	12.8021	17.9866	14.1996	13.6704	11.1433	15.1619	11.6447
Tig	CVS40_7423	KAI8121545.1	TIG_DROME	813.072	713.853	340.338	563.763	362.342	399.413	593.103	714.407	555.543
Ero1L	CVS40_11043	KAI8116965.1	ERO1L_DROME	132.779	126.437	113.829	103.912	130.149	114.19	106.582	99.4449	100.256
CecC	CVS40_8870	KAI8119792.1	CECC_DROMA	1.76609	2.19032	1.15095	2.65501	5.56999	0.431208	17.3506	16.351	3.27776
CVS40_3896	CVS40_3896	KAI8125976.1	V034_FOWPN	0.626971	1.55515	1.63438	0.565526	0.878834	0.612324	0.703947	1.07494	1.16362
CVS40_5854	CVS40_5854	KAI8123424.1	PE44_LUCCU	10241.5	11451.8	14736.1	9216.53	9662.4	11160.7	12471.3	11512.5	14918.4
CVS40_10193	CVS40_10193	KAI8118133.1	PAQR3_HUMAN	459.703	554.803	584.518	499.188	516.882	574.444	534.856	501.667	712.504
CVS40_2156	CVS40_2156	KAI8128144.1	CHS5_YEAST	64.6381	31.9869	84.6638	7.75464	4.01693	17.9588	12.6021	21.946	57.6184
fz3	CVS40_11543	KAI8116369.1	FRIZ3_DROME	31.8904	30.0048	38.2855	45.3348	35.6117	40.5823	27.6587	39.6842	52.2316
CVS40_4788	CVS40_4788	KAI8124822.1	GUND_CLOC7	8.64746	8.79173	3.53858	7.25581	8.66812	7.0706	7.28187	6.20626	7.83797
CVS40_8267	CVS40_8267	KAI8120472.1	P27K_GALME	69.0435	62.1861	67.9684	68.9653	71.9455	77.9072	52.4081	46.7665	28.4256
svr	CVS40_11303	KAI8116670.1	CBPD_DROME	27.0856	31.6131	27.1665	29.1836	26.3684	28.8083	27.7449	30.2676	24.8592
Magel2	CVS40_3740	KAI8126471.1	MAGL2_MOUSE	24.1168	27.4635	3.45232	11.6515	15.8879	11.2562	29.1765	13.5827	7.1745
CVS40_4474	CVS40_4474	KAI8125254.1	LEU1_PROMS	0.699522	0.325332	0.170964	0.315484	0.367699	0.256192	0.294527	0	0.324568
CVS40_2264	CVS40_2264	KAI8127697.1	TTC17_DANRE	6.07854	3.42216	3.5965	3.60713	4.03597	4.33524	3.77162	4.93657	1.92972
CVS40_4339	CVS40_4339	KAI8125495.1	LYAM1_RAT	19.746	18.794	16.1603	14.083	13.3564	16.1453	27.1973	15.5888	22.1589
RpS19a	CVS40_6464	KAI8122873.1	RS19A_DROME	1621.56	1309.04	1303.07	1504.35	1704.41	1309.3	1533.3	1759.01	1203.04
CVS40_10900	CVS40_10900	KAI8117131.1	CB016_HUMAN	697.221	815.014	601.743	883.139	696.993	630.32	724.637	788.048	780.269
CVS40_1710	CVS40_1710	KAI8128896.1	L2K1_DROME	5.9782	8.34099	6.57445	7.41445	6.02293	7.48063	7.34144	7.43097	7.16564
fz2	CVS40_5929	KAI8123467.1	FRIZ2_DROME	35.1781	31.8367	30.936	36.7535	29.9856	36.5118	37.2858	30.1796	29.9974
CVS40_9486	CVS40_9486	KAI8119006.1	KPC1_HYPJE	1870.94	2082.31	1150.38	1816.27	2054.5	1599	1918.98	2071.59	993.279
CVS40_0406	CVS40_0406	KAI8130086.1	PDAD1_ARCFU	218.132	248.562	34.3574	65.4172	36.3627	19.206	52.1459	88.9535	38.3097
CVS40_1872	CVS40_1872	KAI8128829.1	YOPA_BACSU	20.8548	11.2306	21.4595	7.92043	10.3852	11.2558	16.6372	12.9849	11.7135
ost-1	CVS40_0738	KAI8130064.1	SPRC_CAEEL	718.377	650.199	175.294	289.069	212.514	131.348	490.681	385.84	184.536
PRCP	CVS40_8956	KAI8119702.1	PCP_BOVIN	53.6641	57.2721	28.4383	55.2835	41.1245	41.687	47.568	40.5315	36.9559
TBPL1	CVS40_9513	KAI8118873.1	TBPL1_CHICK	17.2627	19.1895	16.7454	22.8182	20.2945	16.2378	11.1425	16.3942	13.4355
PLXNA4	CVS40_11347	KAI8116616.1	PLXA4_HUMAN	37.3998	38.0424	29.608	42.6921	40.971	31.4934	37.0767	36.3309	29.1451
CVS40_10510	CVS40_10510	KAI8117667.1	ARY2_CALVI	2710.6	2362.42	273.028	421.857	84.3863	23.235	342.04	335.665	187.027
CaBP1	CVS40_4681	KAI8124775.1	PDIA6_DROME	173.865	169.444	116.355	81.6297	58.8787	109.624	130.557	108.492	90.0563
snk	CVS40_0097	KAI8130438.1	SNAK_DROME	1.01552	0.314864	0.165447	4.65632	1.24553	0.743846	2.20914	1.13172	0.471186
CVS40_0943	CVS40_0943	KAI8129622.1	SIL1_DROME	59.5468	55.0218	47.696	36.7933	48.812	39.0053	52.6835	56.5333	37.4876
GBA	CVS40_9930	KAI8118367.1	GBA1_PANTR	11.0885	10.1512	17.4003	14.4237	21.8419	13.8503	18.3309	13.568	13.6476
CVS40_1265	CVS40_1265	KAI8129042.1	EKI1_HUMAN	23.6982	22.043	23.166	23.3189	20.3838	24.1966	26.003	22.9008	12.6616
ast	CVS40_3363	KAI8126565.1	ALLS_SPOFR	0	0.676364	0.355411	2.9515	0	0.266311	16.2265	3.36609	2.36171
CVS40_6249	CVS40_6249	KAI8123039.1	DAPA_THET8	3.32973	2.05234	0.2353	1.79119	0.885667	0.29385	1.8749	1.71264	1.06099
CVS40_4507	CVS40_4507	KAI8125385.1	ENDOU_DROME	251.27	215.449	104.781	158.292	126.103	94.8003	181.363	257.865	151.931
CVS40_9322	CVS40_9322	KAI8119084.1	PDIA3_BOVIN	170.099	155.685	172.802	107.24	129.285	86.6869	179.82	145	127.389
CVS40_9369	CVS40_9369	KAI8119048.1	SETB1_XENLA	7.99808	2.38063	6.25478	0.865711	1.00899	1.8747	12.6619	3.94926	0.890638
CVS40_12249	CVS40_12249	KAI8115575.1	FA5_PIG	113.044	103.087	98.0955	87.0612	100.411	73.3559	115.045	116.495	126.405
CVS40_0556	CVS40_0556	KAI8130636.1	NCKXH_DROME	2.16985	1.55254	1.32862	1.01086	0.77709	1.60684	1.36537	1.4472	1.1506
CVS40_10517	CVS40_10517	KAI8117664.1	ARY1_CALVI	4898.53	3408.75	442.119	658.27	123.007	35.161	125.056	232.242	164.956
CVS40_1270	CVS40_1270	KAI8129518.1	LDLR2_XENLA	29.0965	27.786	26.5469	26.5949	28.9573	20.7442	28.4219	25.5416	21.9605
CVS40_2052	CVS40_2052	KAI8128993.1	GLR37_ARATH	0.119006	0.110707	0	0.0536842	0.0625631	0.0435903	0	0	0.0552309
acr-3	CVS40_5594	KAI8123961.1	ACR3_CAEEL	0.634832	0	0	0	0	0	0	0	0
CVS40_12489	CVS40_12489	KAI8115266.1	TAGF_BACSU	3.16259	3.03977	1.44274	3.51827	0	2.31653	0.976493	0.867562	1.27174
kra	CVS40_1320	KAI8129298.1	LIP3_DROME	199.283	200.818	116.643	183.221	176.129	133.22	289.673	210.362	127.984
MANBA	CVS40_0121	KAI8130190.1	MANBA_CAPHI	48.4455	49.7402	44.4755	38.6397	32.9405	36.1205	50.8721	38.1797	41.8445
CVS40_3431	CVS40_3431	KAI8126880.1	PE44_LUCCU	34008.7	37665.9	45124.7	44718	47350	48825.3	42679.1	37919.6	44028.1
TSKU	CVS40_0354	KAI8130787.1	TSK_CHICK	91.9749	90.9773	81.6147	92.3234	106.17	95.2831	108.201	98.5113	84.8579
CVS40_6445	CVS40_6445	KAI8122849.1	OPGD2_RALSO	0	0.20769	11.5679	0	4.69454	10.3033	0	0	0
CVS40_5599	CVS40_5599	KAI8123957.1	CU16A_LOCMI	0.167123	0.25909	0.381223	0.200996	0.175706	0.122431	0	0.171923	0.155085
uzip	CVS40_5454	KAI8123798.1	UZIP_DROME	109.394	105.352	101.46	116.001	91.7226	81.9851	98.1846	106.495	88.8866
SEMA5A	CVS40_6774	KAI8122265.1	SEM5A_HUMAN	31.7725	31.5533	27.5895	37.1856	30.2448	26.7724	27.2436	30.3673	27.9322
CVS40_0752	CVS40_0752	KAI8130240.1	AC150_NPVAC	4002.12	4334.01	6157.66	4198.77	4676.69	4777.46	6251.24	9037.32	17294.8
CVS40_8458	CVS40_8458	KAI8120257.1	ITPR3_HUMAN	2.06795	2.19831	2.16591	3.33087	2.95044	2.48849	3.35838	3.19095	2.19314
LanB1	CVS40_4341	KAI8125330.1	LAMB1_DROME	334.65	307.098	240.332	282.102	213.255	251.871	297.889	312.524	268.013
CVS40_9799	CVS40_9799	KAI8118602.1	QVR_DROPS	19.7091	17.416	13.4866	22.222	17.871	19.6698	17.4265	20.0213	15.5461
CVS40_0407	CVS40_0407	KAI8130572.1	MSMB5_PROFL	159.54	145.64	24.1419	33.4143	14.0201	10.1302	15.3894	25.4053	8.7087
Cubn	CVS40_6064	KAI8123253.1	CUBN_DROME	116.413	155.326	53.157	40.373	20.6254	19.9154	7.47097	12.0022	6.5735
COL6A3	CVS40_7128	KAI8121921.1	CO6A3_CHICK	176.043	181.688	264.554	223.936	242.664	240.012	218.218	241.883	341.958
F56F10.1	CVS40_12147	KAI8115628.1	YM9I_CAEEL	109.916	91.3511	41.4905	56.8253	40.4185	36.108	72.1231	66.9611	36.3839
CVS40_5523	CVS40_5523	KAI8123671.1	ASPG1_DROER	13.8657	14.0851	8.5606	16.1272	12.8506	13.8981	13.2123	10.6977	7.11066
TLR6	CVS40_8691	KAI8120036.1	TLR6_BOVIN	20.1997	24.1865	18.6691	22.9242	24.479	18.6697	23.69	21.2328	14.9958
TMX1	CVS40_5782	KAI8123845.1	TMX1_HUMAN	120.645	111.097	91.8215	85.9691	102.916	81.4267	100.432	107.442	82.367
Sumf1	CVS40_4942	KAI8124444.1	SUMF1_MOUSE	22.5013	20.796	17.7795	20.1016	21.917	16.6397	21.672	20.1889	17.4783
CVS40_10507	CVS40_10507	KAI8117649.1	ARY2_CALVI	22072.5	17600.4	1922.55	2867.28	544.163	172.577	1290.3	1580.75	828.315
Fuca	CVS40_12190	KAI8115484.1	FUCO_DROME	7.71153	8.54514	3.93306	3.75008	4.08876	2.505	5.70319	3.72499	4.54255
CVS40_4605	CVS40_4605	KAI8124847.1	SEC31_DEBHA	355.498	217.711	244.388	287.001	236.077	200.017	304.5	656.375	690.946
CVS40_9489	CVS40_9489	KAI8119135.1	CD59_SHV21	0.578604	1.25578	0.188526	0.347933	0.202765	0.282544	0	0	1.25283
ccdc47	CVS40_7144	KAI8121910.1	CCD47_DANRE	135.94	128.883	109.657	108.117	117.654	85.8784	115.355	112.07	65.5872
TRYP1	CVS40_2122	KAI8127818.1	TRY1_ANOGA	4.5228	4.60008	4.09067	4.76584	5.82124	4.79899	11.0342	5.1309	4.39315
CVS40_7396	CVS40_7396	KAI8121527.1	KPRS2_ENTFA	2.06644	3.07539	5.2521	2.6095	2.17242	2.72453	1.74011	2.12575	3.06816
bai	CVS40_12828	KAI8114830.1	TMEDA_DROMO	537.287	514.224	491.959	379.686	463.682	380.821	470.925	513.187	356.666
Lip3	CVS40_1140	KAI8129748.1	LIP3_DROME	1.07362	0.873805	0.262385	0.484201	0.141094	0.0983002	3.16426	0.690269	0
CVS40_7556	CVS40_7556	KAI8121281.1	WFKN_DANRE	275.003	314.874	401.129	219.558	259.392	245.277	328.462	328.391	348.694
CVS40_9999	CVS40_9999	KAI8118274.1	LECA_SARPE	6.4724	8.10431	11.6807	5.95036	6.54264	4.37621	8.48987	9.6031	10.1643
Pla2g12a	CVS40_6832	KAI8122251.1	PG12A_MOUSE	17.9744	15.3815	18.0393	23.995	19.6521	18.9588	19.7776	18.9833	15.1229
Gdpgp1	CVS40_12183	KAI8115508.1	GDPP1_MOUSE	3.39134	2.8165	3.43358	3.7691	3.6926	2.92767	2.85579	3.05258	2.92227
Arsb	CVS40_11375	KAI8116552.1	ARSB_MOUSE	40.4348	41.5366	30.6972	39.4416	52.5366	38.4596	14.5723	33.4325	21.307
RAB11FIP5	CVS40_2314	KAI8127888.1	NOTCH_DROME	13.4318	10.1095	8.58879	14.6497	11.1799	8.86366	10.9786	13.1961	9.62837
CVS40_7746	CVS40_7746	KAI8121181.1	UBC3_MIMIV	583.013	535.373	730.716	634.978	499.657	555.4	632.937	1052.95	897.692
rumi	CVS40_0133	KAI8130355.1	RUMI_DROME	11.4111	10.4798	12.8493	11.5957	12.3001	12.2731	11.4336	9.36118	10.4552
ImpL2	CVS40_11033	KAI8116991.1	IMPL2_DROME	50.3693	44.5314	50.7844	52.4016	49.9468	53.5148	39.7513	47.3718	36.693
CVS40_10591	CVS40_10591	KAI8117540.1	TTC3_HUMAN	348.691	412.981	477.245	279.188	313.509	317.228	367.926	325.051	547.473
spz	CVS40_0341	KAI8130368.1	SPZ_DROME	0.657587	1.27037	0.469753	1.30035	0.957201	1.18565	2.00199	1.04071	3.4501
SMOC1	CVS40_3069	KAI8127251.1	SMOC1_HUMAN	20.9391	18.9202	13.646	20.416	17.1911	15.1184	21.9146	25.8481	23.5947
CVS40_5899	CVS40_5899	KAI8123397.1	CHI10_DROME	1743.46	2170.65	2292.2	1698	1797.28	1883.56	2225.1	2330.3	2572.62
CVS40_8046	CVS40_8046	KAI8120794.1	VASO2_TABYA	18.7989	14.0882	9.40611	11.3312	10.865	8.22273	21.232	20.3466	22.7362
scb	CVS40_9496	KAI8119025.1	ITA3_DROME	546.377	537.939	457.963	555.796	608.464	510.864	609.438	673.613	460.952
bun	CVS40_9731	KAI8118637.1	BUN2_DROME	42.7583	48.8937	46.8478	57.2239	54.5608	41.1337	44.9947	43.9438	46.6067
CVS40_9773	CVS40_9773	KAI8118656.1	IML1_CANAL	197.605	208.721	121.345	200.848	200.21	159.312	181.252	164.94	100.3
CVS40_10508	CVS40_10508	KAI8117652.1	ARY2_CALVI	2.03218	0.575293	0.51823	0.637574	0.464436	0.582469	0.372014	0.908915	0.491949
CVS40_4028	CVS40_4028	KAI8125820.1	LECA_SARPE	4.38045	2.50739	4.94086	2.12755	1.77119	1.23407	1.70247	3.11965	2.81418
nrf-6	CVS40_1109	KAI8129252.1	NRF6_CAEEL	44.8957	26.9949	13.7148	40.2789	24.8633	19.2026	24.4388	25.8136	23.8068
CVS40_0727	CVS40_0727	KAI8130615.1	RPOB_NEOSE	6315.71	7240.97	8050.89	5807.9	6278.59	6351.1	6178.44	5860.91	5862.58
Catsup	CVS40_4867	KAI8124947.1	CSUP_DROME	349.336	335.693	358.447	275.438	309.349	244.96	277.385	370.787	280.687
CVS40_0253	CVS40_0253	KAI8130532.1	KAZL2_DOLGE	0	0	0.289703	0.089118	0.103865	0.0723702	0	0	0
CVS40_7261	CVS40_7261	KAI8121756.1	BLC_ECO57	811.718	876.326	1000.44	574.952	688.127	608.956	891.901	905.529	1031.16
KLKB1	CVS40_0205	KAI8130804.1	KLKB1_MOUSE	8121.85	7263.64	7616.96	6186.17	6553.59	6805.67	9927.84	8951.79	7782.11
Sems	CVS40_0508	KAI8130162.1	SEMS_DROME	2908.73	1764.72	1931.95	1138.09	1127.97	1316.48	1734.4	4018.36	1611.06
CVS40_10509	CVS40_10509	KAI8117625.1	ARY2_CALVI	2170.99	1782.89	199.242	221.775	41.9872	11.0533	85.7315	89.2075	47.3313
CCHa2	CVS40_0491	KAI8129963.1	CCHA2_DROME	11.2565	12.8188	7.81572	2.65695	13.1609	14.795	11.8707	10.6056	18.8413
mthl8	CVS40_12988	KAI8114662.1	MTH8_DROME	14.1856	14.3323	10.2807	12.5748	9.77066	9.8532	13.1812	13.8379	18.8379
CVS40_1977	CVS40_1977	KAI8128941.1	PGRP2_MOUSE	201.313	201.33	193.105	194.594	232.027	202.494	201.625	189.879	133.602
NCLN	CVS40_8294	KAI8120451.1	NCLN_HUMAN	219.801	215.57	192.75	189.55	207.773	170.161	178.895	209.648	126.393
CVS40_7848	CVS40_7848	KAI8121061.1	Y309_MYCGE	169.879	121.71	12.8223	16.4485	3.69964	1.40602	12.6619	7.56941	2.67191
amx	CVS40_7733	KAI8121260.1	AMX_DROME	13.102	11.1272	11.4156	13.1026	11.6779	9.80557	17.5088	10.548	12.9512
Atp6ap1	CVS40_2622	KAI8127585.1	VAS1_DROME	1646.88	1629.95	1394.25	1394.35	1525.34	1244.1	1457.98	1529.22	913.703
CVS40_3737	CVS40_3737	KAI8126459.1	GAUTD_ARATH	302.467	391.597	50.1266	115.967	143.755	108.598	376.42	173.157	87.2384
CVS40_2228	CVS40_2228	KAI8128343.1	NBR1_HUMAN	10.9828	11.0878	8.11757	6.40294	6.61784	7.1617	10.7146	6.889	11.186
CVS40_4575	CVS40_4575	KAI8124816.1	C5210_DROME	1015.08	863.316	424.643	609.954	458.548	467.066	773.449	778.809	496.727
Dnajc3	CVS40_1233	KAI8129608.1	DNJC3_RAT	372.015	345.277	290.4	240.747	249.874	264.269	383.553	368.219	259.856
CVS40_7850	CVS40_7850	KAI8121064.1	GCSPA_GEOKA	1182.28	1155.62	159	171.937	102.056	29.6671	426.328	570.078	195.979
CVS40_7539	CVS40_7539	KAI8121367.1	AEGP_MOUSE	68.8752	77.9549	96.971	31.8873	39.2475	26.2294	30.6674	43.577	22.0589
Ppt1	CVS40_2503	KAI8128107.1	PPT1_DROME	27.0576	26.731	20.0428	23.1931	24.9117	20.5577	26.1811	20.573	19.3383
emc10	CVS40_11096	KAI8116928.1	EMC10_XENTR	55.8652	47.0317	57.139	66.3706	58.7303	50.7712	51.1811	55.8722	46.9212
CVS40_1945	CVS40_1945	KAI8128569.1	ASPP_AEDAE	1271.03	1270.33	1004.66	1045.21	1035.61	1080.21	1112.98	901.915	971.762
CVS40_5094	CVS40_5094	KAI8124437.1	Y1161_DROME	33.764	30.3949	24.9314	23.4622	26.5074	22.5555	27.1508	27.8758	21.3811
CVS40_8898	CVS40_8898	KAI8119645.1	OTU6B_DANRE	6435.54	5357.03	7714.45	5233.88	5768.59	5281.05	5812.16	5932.46	5810.13
SDF2	CVS40_5093	KAI8124438.1	SDF2_BOVIN	141.026	135.261	99.4589	81.8691	84.646	89.5374	126.563	117.715	92.8303
SLC10A3	CVS40_2125	KAI8127816.1	P3_HUMAN	6.30192	5.86177	3.86816	3.41059	3.72856	2.83402	3.20872	2.86448	2.9648
CVS40_11934	CVS40_11934	KAI8115926.1	3SOE_HEMHA	73.4157	57.7064	59.6793	62.0143	60.0213	48.9621	58.3709	66.8001	47.2762
CVS40_5084	CVS40_5084	KAI8124635.1	CPR1_DROME	294.854	278.27	212.533	286.188	241.238	226.302	298.183	258.901	223.177
CVS40_8548	CVS40_8548	KAI8120136.1	#N/A	6.20989	6.41797	5.0587	6.22368	6.16568	5.05402	7.26283	8.51748	8.32375
CVS40_10592	CVS40_10592	KAI8117539.1	PAC1_PSES3	2289.81	2512.38	2979.01	1858.88	1892.03	1977.92	2869.74	2552.08	3853.34
DNAJC1	CVS40_6542	KAI8122676.1	DNJC1_HUMAN	80.7474	71.759	71.6441	67.731	68.5327	54.7193	58.6844	91.2655	58.3461
CHMP6	CVS40_2636	KAI8127172.1	FKB14_PONAB	50.9061	50.7828	40.9023	49.2907	46.9604	39.1605	47.4519	46.9932	34.0083
CVS40_4688	CVS40_4688	KAI8124773.1	ANX2B_XENLA	13.3207	7.7981	1.91225	1.17632	0.391716	0.272926	1.3335	1.1499	1.38307
CVS40_8647	CVS40_8647	KAI8120048.1	CATL_SARPE	272.234	287.411	196.515	199.947	218.09	198.168	196.363	145.853	133.284
CVS40_9902	CVS40_9902	KAI8118431.1	CYTA_SARPE	3.01247	2.40177	0.901475	0.332723	0.0646446	0.135093	0.310621	1.01189	1.08396
CVS40_12302	CVS40_12302	KAI8115586.1	TRKH_SHIFL	14.7665	28.4513	27.8387	35.2011	31.0475	31.6758	15.9873	17.3603	26.4269
Alp-m	CVS40_0437	KAI8130954.1	PPB_BOMMO	138.525	136.994	102.018	118.098	101.453	100.288	313.649	218.947	113.824
srfbp1	CVS40_2227	KAI8128351.1	SRFB1_XENTR	14469.9	17318.5	17197.1	16075.7	16789.5	15688.1	16054.5	19025	19471.2
CVS40_8003	CVS40_8003	KAI8120855.1	SSPA_STRGC	474.861	445.276	516.554	375.118	391.753	383.467	494.349	710.316	739.842
CDase	CVS40_8824	KAI8119799.1	NCASE_DROME	39.786	26.5786	13.3955	23.2457	26.4382	21.1012	17.4399	25.3096	8.38111
CVS40_5589	CVS40_5589	KAI8123698.1	CAHD1_DROME	22.6498	23.9575	22.5296	23.4604	24.6469	22.5176	21.6282	20.9958	19.4763
CVS40_3201	CVS40_3201	KAI8126864.1	EXOG_DANRE	29.938	35.2089	9.58703	6.36301	3.25587	3.90688	2.02841	1.23897	2.2353
Qpct	CVS40_6110	KAI8123332.1	QPCT1_DROME	18.1354	18.7944	12.6687	22.0348	19.6313	14.0723	20.0481	17.378	9.95144
CVS40_8581	CVS40_8581	KAI8120204.1	KAZL2_DOLGE	664.404	532.848	599.315	633.072	543.909	504.611	763.886	1066.35	893.715
CVS40_12569	CVS40_12569	KAI8115122.1	ADH2_MAIZE	37.2949	41.6282	57.2382	40.3679	35.2869	38.518	81.968	61.0007	42.9147
PIGX	CVS40_9319	KAI8118959.1	PIGX_HUMAN	32.8277	37.3434	25.152	36.2129	31.9463	33.3064	38.4769	30.5754	29.434
Ppt2	CVS40_3390	KAI8126671.1	PPT2_DROME	36.448	31.4263	28.6237	36.7546	33.7967	29.5471	33.6234	33.7025	22.8018
O-fut2	CVS40_6496	KAI8122728.1	OFUT2_DROME	14.9358	18.7959	11.3081	15.4532	13.7006	12.12	13.8102	12.9543	12.2294
5NUC	CVS40_5740	KAI8123656.1	5NTD_LUTLO	336.296	311.758	241.626	272.47	283.22	244.366	327.812	355.747	214.444
NOMO2	CVS40_2705	KAI8127406.1	NOMO2_HUMAN	78.4411	79.3523	63.8067	73.0996	70.4198	59.6509	66.3957	75.2624	44.7561
epsilonTry	CVS40_2579	KAI8127781.1	TRYE_DROME	1816.66	1893.47	1654.45	1891.43	1818.14	1590.16	1875.84	1850.74	1225.77
CVS40_5542	CVS40_5542	KAI8124003.1	TRYP_SARBU	12.9713	14.5277	5.95185	17.192	16.6978	16.2878	21.6229	14.7052	18.9153
CVS40_8838	CVS40_8838	KAI8119767.1	LECA_SARPE	1.92258	3.3779	3.34116	1.73416	1.7966	1.40825	2.87816	2.85675	4.95582
bark	CVS40_3899	KAI8125971.1	BARK_DROME	5.04969	3.27426	2.49887	5.1029	0.94719	2.25611	2.5937	3.01762	0.797197
Ptp99A	CVS40_0478	KAI8130852.1	PTP99_DROME	13.407	12.0809	9.36138	10.0956	12.8991	10.3026	10.685	9.02006	8.13683
PEK	CVS40_5108	KAI8124674.1	E2AK3_DROME	94.6782	87.0648	71.0394	85.0025	87.0921	80.7051	105.3	87.6356	83.0481
FGFRL1	CVS40_0783	KAI8130521.1	FGRL1_CHICK	33.4115	45.8704	38.7941	43.5606	43.4078	41.7861	37.2269	28.8171	27.0785
P4HA1	CVS40_8817	KAI8119597.1	P4HA1_HUMAN	0.0433418	0.120993	0.042377	0	0	0.222297	0.109523	0.222988	0.0804538
LRRC55	CVS40_4281	KAI8125615.1	LRC55_HUMAN	104.495	107.388	104.337	88.9416	85.3324	73.3479	89.1841	82.6507	69.8568
Pal1	CVS40_1911	KAI8128981.1	PAL1_DROME	0	0.28986	0.522217	0	0	0.293475	1.04965	0.320568	0.454423
CVS40_7839	CVS40_7839	KAI8120987.1	ALR1_SALTI	380.647	271.214	42.77	15.7859	26.9407	12.1324	28.4219	60.761	17.9804
CVS40_10707	CVS40_10707	KAI8117409.1	K0754_HUMAN	9.14568	8.10182	4.04442	3.14262	2.51814	2.71151	4.03407	4.70407	6.66829
Adamtsl4	CVS40_7386	KAI8121476.1	ATL4_MOUSE	30.128	27.8916	17.1569	21.9839	22.2609	19.674	17.472	21.344	12.5283
Updo	CVS40_5524	KAI8123670.1	DCUP_DROME	1886.37	1769.42	1599.64	1816.66	1727.4	1709.54	1847.44	1950.07	1334.96
sNPF	CVS40_7860	KAI8121040.1	SNPF_DROPS	55.6485	68.3028	77.0276	75.7762	68.817	69.3954	69.9681	70.0193	82.2259
CVS40_4029	CVS40_4029	KAI8125819.1	LECA_SARPE	471.356	514.551	649.241	448.461	448.823	427.902	515.77	557.584	864.262
eIF-3p66	CVS40_0608	KAI8130972.1	EI3D1_DROGR	944.137	861.974	670.221	882.219	810.134	812.22	859.668	713.859	637.18
Tango1	CVS40_4096	KAI8125967.1	TGO1_DROME	187.472	180.999	175.715	178.349	160.307	147.422	166.468	184.455	142.026
CVS40_2927	CVS40_2927	KAI8127265.1	MNMG_ROSDO	48.9403	46.7779	54.1101	50.2329	48.9664	47.7145	42.0644	48.2616	42.9095
CVS40_2160	CVS40_2160	KAI8127739.1	UBP8_MOUSE	2.39829	1.60616	3.84487	0.692241	0.504257	0.491875	1.13095	2.17106	3.02674
QSOX1	CVS40_3070	KAI8127658.1	QSOX1_CAVPO	157.712	147.434	120.298	133.315	117.035	112.733	155.374	139.073	110.739
CVS40_3433	CVS40_3433	KAI8126878.1	PE44_LUCCU	492.628	506.76	478.272	437.024	430.427	375.332	453.683	402.96	328.147
CVS40_0806	CVS40_0806	KAI8130831.1	CD047_MOUSE	49.2022	31.1479	24.8265	46.9522	50.2617	27.4911	38.5287	31.3781	21.9061
Alyref2	CVS40_0962	KAI8129886.1	BGH3_MOUSE	0.298359	0.284446	0.204155	0.343128	0.603798	0.158453	0.35174	0.360633	1.34281
glra1	CVS40_3592	KAI8126379.1	PHCL2_ANOGA	123.672	117.324	117.936	140.099	136.108	122.11	121.894	141.784	109.432
CVS40_0506	CVS40_0506	KAI8130154.1	AROA_MANHA	46.3606	50.9631	51.7054	41.437	38.7691	35.0386	78.2562	42.4884	21.3151
CVS40_2592	CVS40_2592	KAI8127058.1	DBP9_ASPCL	38.4681	47.6732	32.8829	40.3872	40.3215	36.2514	36.0776	31.8564	28.3152
CVS40_3796	CVS40_3796	KAI8125996.1	LECA_SARPE	275.318	190.217	169.236	120.581	120.444	107.306	154.157	222.53	199.715
PSAP	CVS40_9018	KAI8119583.1	SAP_HUMAN	1201.55	1243.76	904.676	1032.89	985.268	890.105	912.529	803.775	643.303
UGT2B33	CVS40_0024	KAI8130126.1	UGT5_DACCO	0	0	0	0	0	0.081364	0	0	0
CVS40_7975	CVS40_7975	KAI8120886.1	P5I13_HUMAN	66.3376	61.8345	49.9356	70.5665	67.2385	64.2752	65.1719	57.1557	58.5722
O-fut1	CVS40_2072	KAI8128376.1	OFUT1_DROME	1.98866	2.01658	1.97137	1.878	2.09291	1.64421	2.07057	2.14324	2.02892
CVS40_3435	CVS40_3435	KAI8126873.1	PE48A_LUCCU	10670.9	10820.7	10578.2	10077.1	11230.3	8822.62	11110.4	11500.4	10886.9
CVS40_5904	CVS40_5904	KAI8123438.1	PE44_LUCCU	16687.3	16921.6	16542.2	15758.8	17562.1	13796.9	17374.6	17984.4	17025.1
CVS40_3437	CVS40_3437	KAI8126876.1	PE48A_LUCCU	1985.48	2013.36	1968.22	1875	2089.56	1641.58	2067.26	2139.81	2025.68
CVS40_3434	CVS40_3434	KAI8126877.1	PE44_LUCCU	853.571	865.556	846.153	806.077	898.318	705.726	888.73	919.921	870.852

## Sheet: S6 - Transcriptomics Gostats
Higher in Milk vs Sera												Higher in Milk vs Meat												Higher in Meat vs Sera												Higher in Milk vs Both Meat and Sera
GOID	Pvalue	OddsRatio	ExpCount	Count	Size	Term	Ontology	Proteins	Pvalue_bonferroni	Log10		GOID	Pvalue	OddsRatio	ExpCount	Count	Size	Term	Ontology	Proteins	Pvalue_bonferroni	Log10		GOID	Pvalue	OddsRatio	ExpCount	Count	Size	Term	Ontology	Proteins	Pvalue_bonferroni	Log10		GOID	Pvalue	OddsRatio	ExpCount	Count	Size	Term	Ontology	Proteins	Pvalue_bonferroni	log10
GO:0044444	1.90163e-18	1.8796	420.336	542	4318	cytoplasmic part	CC	2AAA_DROME;4CLL7_ARATH;AATC_CHICK;ABCD1_DROME;ABCD3_HUMAN;ABCE1_DROME;ABCG1_MOUSE;ABD12_DANRE;ABHD4_BOVIN;ACADM_DROME;ACADS_RAT;ACADV_RAT;ACASE_DROME;ACKR3_CANLF;ACOX1_DROME;ACOX3_HUMAN;ACSF2_HUMAN;ACSL5_MOUSE;ADA2_HUMAN;ADCK_DROME;ADHX_DROME;ADT_DROME;AHSA1_HUMAN;AK1A1_MOUSE;AKAP1_MOUSE;AL1L1_XENTR;ALAT2_MOUSE;ALDH2_HUMAN;ALDR_BOVIN;ALG11_HUMAN;ALG8_DROME;ALR_PSEF5;AMACR_MOUSE;AMPE_HUMAN;AN13C_H…	1.67914e-15	14.7749		GO:0005783	1.12143e-26	3.7056	44.4781	122	752	endoplasmic reticulum	CC	ACOHC_HUMAN;ACSL4_HUMAN;AIMP1_HUMAN;ALG5_DROME;ALG8_DROME;ANO5_MOUSE;AP3D_DROME;ARMET_DROMO;BAP31_PONAB;BASI_HUMAN;BET1_HUMAN;BIP_DROME;BSCL2_DROME;C4AD1_DROME;C56D2_BOVIN;CACP_RAT;CALR_DROME;CC50A_CHICK;CISD2_DROWI;CLP1L_CHICK;COG5_DROME;COPA_HUMAN;COPG_DROME;CP4E2_DROME;CP4S3_DROME;CP6D1_MUSDO;CP6V1_DROME;CREL2_DANRE;CSPG2_HUMAN;DDRGK_DROMO;DDX6_DROME;DERL1_DROME;DERL2_PONAB;DHB13_HUMAN;DJB12_H…	6.85196e-24	23.1642		GO:0043231	2.04416e-41	2.80802	517.189	702	5068	intracellular membrane-bounded organelle	CC	4CLL7_ARATH;AAKG2_MOUSE;ABCD3_HUMAN;ABCF1_HUMAN;ABCG1_MOUSE;ABITM_DROME;ACADM_DROME;ACADV_RAT;ACASE_DROME;ACOHC_MOUSE;ACON_CAEEL;ACSF2_HUMAN;ACSS3_RAT;ADAR_DROME;ADAT1_DROME;ADCK_DROME;ADF1_DROME;AHSA1_HUMAN;AIMP2_DROME;AK17A_HUMAN;AKA10_MOUSE;AKAP1_MOUSE;ALAT2_MOUSE;ALG11_HUMAN;ALKB1_MOUSE;ALKB6_DANRE;ALPL_ARATH;ALS2_DROME;AN13C_HUMAN;ANGEL_DROME;ANM1_HUMAN;ANM5_DROME;ANM6_DANRE;AP1G1_MOUSE;AP1S…	1.6946e-38	37.7709		GO:0044444	1.94509e-15	3.20683	104.479	161	4318	cytoplasmic part	CC	4CLL7_ARATH;ABCD1_DROME;ABCD3_HUMAN;ACADS_RAT;ADA2_HUMAN;ADHX_DROME;AL1L1_XENTR;ALAT2_MOUSE;ALDR_BOVIN;ALG8_DROME;AMPE_HUMAN;AP3M1_PONAB;ARMC5_RAT;AT133_HUMAN;BAP31_PONAB;BASI_HUMAN;BET1_HUMAN;BIP_DROME;BPHL_HUMAN;BSCL2_DROME;C4AD1_DROME;C56D2_BOVIN;CACP_RAT;CAPU_DROME;CC50A_CHICK;CCZ1_BOVIN;CD63_RABIT;CHCH2_MOUSE;CMC_DROME;COASY_MOUSE;COLT_DROME;COXM1_BOVIN;CP135_HUMAN;CP4E2_DROME;CP4S3_DROME;CP…	7.70257e-13	12.1134
GO:0043227	6.32519e-18	1.93981	524.106	639	5384	membrane-bounded organelle	CC	2AAA_DROME;4CLL7_ARATH;ABCD1_DROME;ABCD3_HUMAN;ABCG1_MOUSE;ABD12_DANRE;ABHD4_BOVIN;ABITM_DROME;ACADM_DROME;ACADS_RAT;ACADV_RAT;ACASE_DROME;ACBD6_MOUSE;ACKR3_CANLF;ACOX1_DROME;ACOX3_HUMAN;ACSF2_HUMAN;ACSL5_MOUSE;ACY1A_RAT;ADA2_HUMAN;ADAT1_DROME;ADCK_DROME;ADT_DROME;AHSA1_HUMAN;AKAP1_MOUSE;ALAT2_MOUSE;ALDH2_HUMAN;ALG11_HUMAN;ALG8_DROME;AL_DROME;AMACR_MOUSE;AMPE_HUMAN;AN13C_HUMAN;ANFY1_MOUSE;ANGEL_D…	5.58514e-15	14.253		GO:0012505	1.03345e-24	2.77206	97.5324	194	1649	endomembrane system	CC	ACOHC_HUMAN;ACSL4_HUMAN;ADA2_HUMAN;AIMP1_HUMAN;ALG5_DROME;ALG8_DROME;AN13B_MOUSE;ANO5_MOUSE;ANXB9_DROME;AP2S1_PONAB;AP3B2_HUMAN;AP3D_DROME;AP3M1_PONAB;AP3S2_BOVIN;APMAP_DROME;ARF1_LOCMI;ARL1_DROME;ARMET_DROMO;AT133_HUMAN;B4GT7_MOUSE;BAP31_PONAB;BASI_HUMAN;BET1_HUMAN;BIP_DROME;BSCL2_DROME;C4AD1_DROME;C56D2_BOVIN;CACP_RAT;CALR_DROME;CAP1_HUMAN;CC50A_CHICK;CCZ1_BOVIN;CD63_RABIT;CISD2_DROWI;CK5P3_DRO…	6.31438e-22	21.1997		GO:0022613	1.61202e-38	5.21948	38.1072	128	371	ribonucleoprotein complex biogenesis	BP	AUB_DROME;BOP1_DROGR;BRX1_DROME;BYS_DROME;C1D_XENLA;CNOT1_XENTR;CSDE1_RAT;DDX17_MOUSE;DDX18_DROME;DDX27_BOVIN;DDX47_DROME;DDX49_DROME;DDX51_DROME;DDX52_DROME;DDX56_HUMAN;DER_CHLTE;DHX33_DROME;DIM1_DROME;DKC1_DROME;EFL1_HUMAN;EI3G1_DROWI;EIF3A_DROSI;EIF3I_COCIM;EIF3I_DROMO;EXOS3_DROME;EXOS9_DANRE;EXOSX_MOUSE;FBRL_DROME;GAR1_DROME;GNL3_DROME;HEAT1_DROME;HEAT3_HUMAN;HSP7D_DROME;HTSF1_HUMAN;IF2G_DROM…	9.12083e-35	34.04		GO:0005783	5.92326e-12	3.53184	18.1956	51	752	endoplasmic reticulum	CC	ALG8_DROME;BAP31_PONAB;BASI_HUMAN;BET1_HUMAN;BIP_DROME;BSCL2_DROME;C4AD1_DROME;C56D2_BOVIN;CACP_RAT;CC50A_CHICK;CP4E2_DROME;CP4S3_DROME;CP6D1_MUSDO;DERL2_PONAB;DHB13_HUMAN;DPM1_DROME;ENPL_RAT;EXT2_DROME;FAD9_ACHDO;FITM2_DROME;FKBP8_MOUSE;G6PT3_DANRE;GANAB_PIG;HOBIT_DROME;HYEP1_CTEFE;HYOU1_DANRE;LDAH_DROME;MLECA_XENLA;NB5R3_HUMAN;NPC2_BOVIN;P4K2B_DANRE;PEX3_MOUSE;PIPNB_HUMAN;PRDX4_MOUSE;S35B4_DROM…	2.34561e-09	8.62974
GO:0019395	1.3649e-18	19.7192	3.92055	27	40	fatty acid oxidation	BP	ABCD1_DROME;ABCD3_HUMAN;ACADM_DROME;ACADS_RAT;ACADV_RAT;ACOX1_DROME;ACOX3_HUMAN;ADRL_DROME;CACP_RAT;CPT1A_MOUSE;CPT2_XENLA;DHB4_DROME;DHB4_RAT;ECH1_RAT;ECHA_PIG;ECHB_PANTR;ECI1_MOUSE;ETFA_MACFA;ETFD_RAT;HACL1_MOUSE;HPCD_METS5;OCTC_HUMAN;PEX5_CRIGR;PM34_HUMAN;SCP2_CHICK;THIM_HUMAN;TYSD1_HUMAN	7.8004e-15	14.1079		GO:0044432	1.02212e-21	3.72948	32.8263	94	555	endoplasmic reticulum part	CC	ACSL4_HUMAN;ALG5_DROME;ALG8_DROME;ANO5_MOUSE;BAP31_PONAB;BASI_HUMAN;BET1_HUMAN;BIP_DROME;BSCL2_DROME;C4AD1_DROME;C56D2_BOVIN;CALR_DROME;CISD2_DROWI;CLP1L_CHICK;COG5_DROME;COPA_HUMAN;CP4E2_DROME;CP4S3_DROME;CP6D1_MUSDO;CP6V1_DROME;CSPG2_HUMAN;DDRGK_DROMO;DERL1_DROME;DERL2_PONAB;DJB12_HUMAN;DPM1_DROME;EDEM3_HUMAN;EMC1_MOUSE;ENPL_RAT;ERD2_DROME;ERGI3_DANRE;ERLEC_MOUSE;ERP44_MOUSE;EXT2_DROME;FAD9_ACH…	6.24518e-19	18.2045		GO:0043227	7.13776e-37	2.70922	549.437	720	5384	membrane-bounded organelle	CC	4CLL7_ARATH;AAKG2_MOUSE;ABCD3_HUMAN;ABCF1_HUMAN;ABCG1_MOUSE;ABITM_DROME;ACADM_DROME;ACADV_RAT;ACASE_DROME;ACKR3_CANLF;ACK_DROME;ACOHC_MOUSE;ACON_CAEEL;ACSF2_HUMAN;ACSS3_RAT;ADAR_DROME;ADAT1_DROME;ADCK_DROME;ADF1_DROME;AHSA1_HUMAN;AIMP2_DROME;AK17A_HUMAN;AKA10_MOUSE;AKAP1_MOUSE;ALAT2_MOUSE;ALG11_HUMAN;ALKB1_MOUSE;ALKB6_DANRE;ALPL_ARATH;ALS2_DROME;AN13C_HUMAN;ANGEL_DROME;ANM1_HUMAN;ANM5_DROME;ANM6_…	5.9172e-34	33.2279		GO:0005737	1.22072e-10	2.89898	137.773	180	5694	cytoplasm	CC	4CLL7_ARATH;ABCD1_DROME;ABCD3_HUMAN;ACADS_RAT;ACBD6_MOUSE;ACY1A_RAT;ADA2_HUMAN;ADHX_DROME;AL1L1_XENTR;ALAT2_MOUSE;ALDO2_ARATH;ALDR_BOVIN;ALG8_DROME;AMPE_HUMAN;AP3M1_PONAB;APC5_PONAB;AR1AB_XENLA;ARMC5_RAT;AT133_HUMAN;BAP31_PONAB;BASI_HUMAN;BET1_HUMAN;BIP_DROME;BPHL_HUMAN;BSCL2_DROME;C4AD1_DROME;C56D2_BOVIN;CACP_RAT;CAPU_DROME;CC50A_CHICK;CCZ1_BOVIN;CD63_RABIT;CGL_PIG;CHCH2_MOUSE;CMC_DROME;COASY_MO…	4.83406e-08	7.31569
GO:0043231	2.98955e-17	1.87927	493.345	608	5068	intracellular membrane-bounded organelle	CC	2AAA_DROME;4CLL7_ARATH;ABCD1_DROME;ABCD3_HUMAN;ABCG1_MOUSE;ABD12_DANRE;ABHD4_BOVIN;ABITM_DROME;ACADM_DROME;ACADS_RAT;ACADV_RAT;ACASE_DROME;ACBD6_MOUSE;ACOX1_DROME;ACOX3_HUMAN;ACSF2_HUMAN;ACSL5_MOUSE;ADA2_HUMAN;ADAT1_DROME;ADCK_DROME;ADT_DROME;AHSA1_HUMAN;AKAP1_MOUSE;ALAT2_MOUSE;ALDH2_HUMAN;ALG11_HUMAN;ALG8_DROME;AL_DROME;AMACR_MOUSE;AMPE_HUMAN;AN13C_HUMAN;ANGEL_DROME;ANM1_HUMAN;AP1G1_MOUSE;AP1S2_…	2.63977e-14	13.5784		GO:0031984	1.74307e-20	3.2121	44.1232	110	746	organelle subcompartment	CC	ACSL4_HUMAN;ALG5_DROME;ALG8_DROME;ANO5_MOUSE;AP3D_DROME;ARF1_LOCMI;ARL1_DROME;B4GT7_MOUSE;BAP31_PONAB;BASI_HUMAN;BET1_HUMAN;BSCL2_DROME;C4AD1_DROME;C56D2_BOVIN;CALR_DROME;CISD2_DROWI;CLP1L_CHICK;COG2_DROME;COG3_DROME;COG5_DROME;COPA_HUMAN;COPB2_DROME;COPB_DROPS;COPD_BOVIN;COPG_DROME;COPZ1_BOVIN;CP4E2_DROME;CP4S3_DROME;CP6D1_MUSDO;CP6V1_DROME;DDRGK_DROMO;DERL1_DROME;DERL2_PONAB;DJB12_HUMAN;DPM1_DR…	1.06502e-17	16.9726		GO:0044428	3.1246e-36	2.67147	175.118	327	1716	nuclear part	CC	AAKG2_MOUSE;ABCF1_HUMAN;ABCG1_MOUSE;ADAR_DROME;ADAT1_DROME;AK17A_HUMAN;ALKB1_MOUSE;ALPL_ARATH;ANM1_HUMAN;APBP2_MOUSE;ARMC5_RAT;ASH2_DROME;BAZ1A_HUMAN;BDP1_HUMAN;BNIP3_HUMAN;BOD1_RAT;BOP1_DROGR;BRX1_DROME;BYS_DROME;C1D_XENLA;CAPAM_MOUSE;CARL1_HUMAN;CB042_MOUSE;CC137_MOUSE;CCNC_DROPS;CCNK_HUMAN;CCNL2_RAT;CDC16_HUMAN;CDC5L_HUMAN;CEBPZ_MOUSE;CHERP_HUMAN;COQ2_DROPS;COX10_MOUSE;CPSF6_DROME;CSN6_DROME;D…	2.5903e-33	32.5867		GO:0042175	2.59711e-09	3.56285	12.0739	36	499	nuclear outer membrane-endoplasmic reticulum membrane network	CC	ALG8_DROME;BAP31_PONAB;BASI_HUMAN;BET1_HUMAN;BSCL2_DROME;C4AD1_DROME;C56D2_BOVIN;CP4E2_DROME;CP4S3_DROME;CP6D1_MUSDO;DERL2_PONAB;DPM1_DROME;ENPL_RAT;EXT2_DROME;FAD9_ACHDO;FITM2_DROME;FKBP8_MOUSE;G6PT3_DANRE;HOBIT_DROME;HYEP1_CTEFE;LDAH_DROME;MLECA_XENLA;NB5R3_HUMAN;P4K2B_DANRE;PIPNB_HUMAN;S22A3_RAT;S35B4_DROME;SAC1_DROME;SAR1B_MOUSE;SC31A_HUMAN;SE1L1_MOUSE;SRPRA_DROME;TECR_BOVIN;TM214_BOVIN;TMED6…	1.02846e-06	5.98781
GO:0005737	1.2436e-16	1.92316	554.283	662	5694	cytoplasm	CC	2AAA_DROME;4CLL7_ARATH;AATC_CHICK;ABCD1_DROME;ABCD3_HUMAN;ABCE1_DROME;ABCG1_MOUSE;ABD12_DANRE;ABHD4_BOVIN;ACADM_DROME;ACADS_RAT;ACADV_RAT;ACASE_DROME;ACBD6_MOUSE;ACKR3_CANLF;ACOX1_DROME;ACOX3_HUMAN;ACSF2_HUMAN;ACSL5_MOUSE;ACY1A_RAT;ADA2_HUMAN;ADAT1_DROME;ADCK_DROME;ADHX_DROME;ADT_DROME;AHSA1_HUMAN;AK1A1_MOUSE;AKAP1_MOUSE;AL1L1_XENTR;ALAT2_MOUSE;ALDH2_HUMAN;ALDO2_ARATH;ALDR_BOVIN;ALG11_HUMAN;ALG8_…	1.0981e-13	12.9594		GO:0044444	2.87413e-20	2.33913	255.394	357	4318	cytoplasmic part	CC	1433E_DROME;3HIDH_DROME;4CLL7_ARATH;5NTC_XENTR;ABCD1_DROME;ABCD3_HUMAN;ACAC_CHICK;ACADS_RAT;ACLY_RAT;ACOHC_HUMAN;ACOT9_MOUSE;ACSL4_HUMAN;ADA2_HUMAN;ADHX_DROME;ADXH2_DROME;AIMP1_HUMAN;AL1B1_RAT;AL1L1_XENTR;ALAT2_MOUSE;ALDR_BOVIN;ALG5_DROME;ALG8_DROME;AMPE_HUMAN;AN13B_MOUSE;ANO5_MOUSE;ANXB9_DROME;AP2S1_PONAB;AP3B2_HUMAN;AP3D_DROME;AP3M1_PONAB;AP3S2_BOVIN;APC1_HUMAN;ARF1_LOCMI;ARL1_DROME;ARMC5_RAT;A…	1.75609e-17	16.7555		GO:0031974	3.61918e-35	2.60506	183.486	335	1798	membrane-enclosed lumen	CC	AAKG2_MOUSE;ABCD3_HUMAN;ABCF1_HUMAN;ABCG1_MOUSE;ACADM_DROME;ACADV_RAT;ACSF2_HUMAN;ACSS3_RAT;ADAR_DROME;ADAT1_DROME;AK17A_HUMAN;ALKB1_MOUSE;ALPL_ARATH;ANGEL_DROME;ANM1_HUMAN;APBP2_MOUSE;ARMC5_RAT;ASH2_DROME;ATD3A_DROME;BAZ1A_HUMAN;BDP1_HUMAN;BNIP3_HUMAN;BOD1_RAT;BOP1_DROGR;BRX1_DROME;BYS_DROME;C1D_XENLA;CAPAM_MOUSE;CARL1_HUMAN;CB042_MOUSE;CC137_MOUSE;CCNC_DROPS;CCNK_HUMAN;CCNL2_RAT;CDC16_HUMAN;CDC…	3.0003e-32	31.5228		GO:0044432	1.29403e-08	3.26935	13.4289	37	555	endoplasmic reticulum part	CC	ALG8_DROME;BAP31_PONAB;BASI_HUMAN;BET1_HUMAN;BIP_DROME;BSCL2_DROME;C4AD1_DROME;C56D2_BOVIN;CP4E2_DROME;CP4S3_DROME;CP6D1_MUSDO;DERL2_PONAB;DPM1_DROME;ENPL_RAT;EXT2_DROME;FAD9_ACHDO;FITM2_DROME;FKBP8_MOUSE;G6PT3_DANRE;GANAB_PIG;HOBIT_DROME;HYEP1_CTEFE;HYOU1_DANRE;LDAH_DROME;MLECA_XENLA;NB5R3_HUMAN;P4K2B_DANRE;PIPNB_HUMAN;S35B4_DROME;SAC1_DROME;SAR1B_MOUSE;SC31A_HUMAN;SE1L1_MOUSE;SRPRA_DROME;TECR_B…	5.12435e-06	5.29036
GO:0034440	2.25386e-17	16.0156	4.2146	27	43	lipid oxidation	BP	ABCD1_DROME;ABCD3_HUMAN;ACADM_DROME;ACADS_RAT;ACADV_RAT;ACOX1_DROME;ACOX3_HUMAN;ADRL_DROME;CACP_RAT;CPT1A_MOUSE;CPT2_XENLA;DHB4_DROME;DHB4_RAT;ECH1_RAT;ECHA_PIG;ECHB_PANTR;ECI1_MOUSE;ETFA_MACFA;ETFD_RAT;HACL1_MOUSE;HPCD_METS5;OCTC_HUMAN;PEX5_CRIGR;PM34_HUMAN;SCP2_CHICK;THIM_HUMAN;TYSD1_HUMAN	1.28808e-13	12.8901		GO:0042175	1.16138e-18	3.57924	29.5141	83	499	nuclear outer membrane-endoplasmic reticulum membrane network	CC	ACSL4_HUMAN;ALG5_DROME;ALG8_DROME;ANO5_MOUSE;BAP31_PONAB;BASI_HUMAN;BET1_HUMAN;BSCL2_DROME;C4AD1_DROME;C56D2_BOVIN;CALR_DROME;CISD2_DROWI;CLP1L_CHICK;COPA_HUMAN;CP4E2_DROME;CP4S3_DROME;CP6D1_MUSDO;CP6V1_DROME;DDRGK_DROMO;DERL1_DROME;DERL2_PONAB;DJB12_HUMAN;DPM1_DROME;EMC1_MOUSE;ENPL_RAT;ERD2_DROME;ERGI3_DANRE;ERP44_MOUSE;EXT2_DROME;FAD9_ACHDO;FITM2_DROME;FKBP8_MOUSE;G6PT3_DANRE;GORS2_RAT;HACD3_BO…	7.09603e-16	15.149		GO:0070013	3.61918e-35	2.60506	183.486	335	1798	intracellular organelle lumen	CC	AAKG2_MOUSE;ABCD3_HUMAN;ABCF1_HUMAN;ABCG1_MOUSE;ACADM_DROME;ACADV_RAT;ACSF2_HUMAN;ACSS3_RAT;ADAR_DROME;ADAT1_DROME;AK17A_HUMAN;ALKB1_MOUSE;ALPL_ARATH;ANGEL_DROME;ANM1_HUMAN;APBP2_MOUSE;ARMC5_RAT;ASH2_DROME;ATD3A_DROME;BAZ1A_HUMAN;BDP1_HUMAN;BNIP3_HUMAN;BOD1_RAT;BOP1_DROGR;BRX1_DROME;BYS_DROME;C1D_XENLA;CAPAM_MOUSE;CARL1_HUMAN;CB042_MOUSE;CC137_MOUSE;CCNC_DROPS;CCNK_HUMAN;CCNL2_RAT;CDC16_HUMAN;CDC…	3.0003e-32	31.5228		GO:0012505	1.67624e-08	2.36112	39.8996	74	1649	endomembrane system	CC	ADA2_HUMAN;ALG8_DROME;AP3M1_PONAB;AT133_HUMAN;BAP31_PONAB;BASI_HUMAN;BET1_HUMAN;BIP_DROME;BSCL2_DROME;C4AD1_DROME;C56D2_BOVIN;CACP_RAT;CC50A_CHICK;CCZ1_BOVIN;CD63_RABIT;CP4E2_DROME;CP4S3_DROME;CP6D1_MUSDO;CREG1_MOUSE;DERL2_PONAB;DHB13_HUMAN;DNJC5_DROME;DPM1_DROME;ENPL_RAT;EXT2_DROME;FAD9_ACHDO;FITM2_DROME;FKBP8_MOUSE;G6PT3_DANRE;GALT1_DROME;GANAB_PIG;HDAC6_HUMAN;HIP14_DROME;HOBIT_DROME;HYEP1_CTEF…	6.63793e-06	5.17797
GO:0006635	2.54935e-17	19.7337	3.62651	25	37	fatty acid beta-oxidation	BP	ABCD1_DROME;ABCD3_HUMAN;ACADM_DROME;ACADS_RAT;ACADV_RAT;ACOX1_DROME;ACOX3_HUMAN;CACP_RAT;CPT1A_MOUSE;CPT2_XENLA;DHB4_DROME;DHB4_RAT;ECH1_RAT;ECHA_PIG;ECHB_PANTR;ECI1_MOUSE;ETFA_MACFA;ETFD_RAT;HPCD_METS5;OCTC_HUMAN;PEX5_CRIGR;PM34_HUMAN;SCP2_CHICK;THIM_HUMAN;TYSD1_HUMAN	1.45696e-13	12.8366		GO:0005789	4.75707e-18	3.53998	28.9817	81	490	endoplasmic reticulum membrane	CC	ACSL4_HUMAN;ALG5_DROME;ALG8_DROME;ANO5_MOUSE;BAP31_PONAB;BASI_HUMAN;BET1_HUMAN;BSCL2_DROME;C4AD1_DROME;C56D2_BOVIN;CALR_DROME;CISD2_DROWI;CLP1L_CHICK;COPA_HUMAN;CP4E2_DROME;CP4S3_DROME;CP6D1_MUSDO;CP6V1_DROME;DDRGK_DROMO;DERL1_DROME;DERL2_PONAB;DJB12_HUMAN;DPM1_DROME;EMC1_MOUSE;ENPL_RAT;ERD2_DROME;ERGI3_DANRE;ERP44_MOUSE;EXT2_DROME;FAD9_ACHDO;FITM2_DROME;FKBP8_MOUSE;G6PT3_DANRE;GORS2_RAT;HACD3_BO…	2.90657e-15	14.5366		GO:0043233	3.61918e-35	2.60506	183.486	335	1798	organelle lumen	CC	AAKG2_MOUSE;ABCD3_HUMAN;ABCF1_HUMAN;ABCG1_MOUSE;ACADM_DROME;ACADV_RAT;ACSF2_HUMAN;ACSS3_RAT;ADAR_DROME;ADAT1_DROME;AK17A_HUMAN;ALKB1_MOUSE;ALPL_ARATH;ANGEL_DROME;ANM1_HUMAN;APBP2_MOUSE;ARMC5_RAT;ASH2_DROME;ATD3A_DROME;BAZ1A_HUMAN;BDP1_HUMAN;BNIP3_HUMAN;BOD1_RAT;BOP1_DROGR;BRX1_DROME;BYS_DROME;C1D_XENLA;CAPAM_MOUSE;CARL1_HUMAN;CB042_MOUSE;CC137_MOUSE;CCNC_DROPS;CCNK_HUMAN;CCNL2_RAT;CDC16_HUMAN;CDC…	3.0003e-32	31.5228		GO:0005789	2.04682e-08	3.38189	11.8562	34	490	endoplasmic reticulum membrane	CC	ALG8_DROME;BAP31_PONAB;BASI_HUMAN;BET1_HUMAN;BSCL2_DROME;C4AD1_DROME;C56D2_BOVIN;CP4E2_DROME;CP4S3_DROME;CP6D1_MUSDO;DERL2_PONAB;DPM1_DROME;ENPL_RAT;EXT2_DROME;FAD9_ACHDO;FITM2_DROME;FKBP8_MOUSE;G6PT3_DANRE;HOBIT_DROME;HYEP1_CTEFE;LDAH_DROME;MLECA_XENLA;NB5R3_HUMAN;P4K2B_DANRE;PIPNB_HUMAN;S35B4_DROME;SAC1_DROME;SAR1B_MOUSE;SC31A_HUMAN;SE1L1_MOUSE;SRPRA_DROME;TECR_BOVIN;TM214_BOVIN;TMED6_HUMAN	8.10542e-06	5.09122
GO:0044424	2.36033e-16	2.42154	704.779	788	7240	intracellular part	CC	2AAA_DROME;4CLL7_ARATH;AATC_CHICK;ABCD1_DROME;ABCD3_HUMAN;ABCE1_DROME;ABCG1_MOUSE;ABD12_DANRE;ABHD4_BOVIN;ABITM_DROME;ACADM_DROME;ACADS_RAT;ACADV_RAT;ACASE_DROME;ACBD6_MOUSE;ACKR3_CANLF;ACOX1_DROME;ACOX3_HUMAN;ACSF2_HUMAN;ACSL5_MOUSE;ACY1A_RAT;ADA2_HUMAN;ADAT1_DROME;ADCK_DROME;ADHX_DROME;ADT_DROME;AHSA1_HUMAN;AK1A1_MOUSE;AKAP1_MOUSE;AL1L1_XENTR;ALAT2_MOUSE;ALDH2_HUMAN;ALDO2_ARATH;ALDR_BOVIN;ALG11…	2.08417e-13	12.6811		GO:0005737	5.51084e-18	2.45114	336.78	425	5694	cytoplasm	CC	1433E_DROME;3HIDH_DROME;4CLL7_ARATH;5NTC_XENTR;ABCD1_DROME;ABCD3_HUMAN;ACAC_CHICK;ACADS_RAT;ACBD6_MOUSE;ACLY_RAT;ACOHC_HUMAN;ACOT9_MOUSE;ACSA_DROME;ACSL4_HUMAN;ACT5C_ANOGA;ACY1A_RAT;ACY1B_RAT;ADA2_HUMAN;ADHX_DROME;ADXH2_DROME;AIMP1_HUMAN;AL1B1_RAT;AL1L1_XENTR;ALAT2_MOUSE;ALDO2_ARATH;ALDR_BOVIN;ALG5_DROME;ALG8_DROME;AMPE_HUMAN;AN13B_MOUSE;ANO5_MOUSE;ANX10_DROME;ANXB9_DROME;AP2S1_PONAB;AP3B2_HUMAN;…	3.36712e-15	14.4727		GO:0005730	1.40762e-34	4.61903	41.0241	128	402	nucleolus	CC	ADAR_DROME;ADAT1_DROME;BOP1_DROGR;BRX1_DROME;BYS_DROME;C1D_XENLA;CC137_MOUSE;COX10_MOUSE;DDX17_MOUSE;DDX18_DROME;DDX27_BOVIN;DDX47_DROME;DDX51_DROME;DDX52_DROME;DDX54_MOUSE;DDX56_HUMAN;DHX33_DROME;DIM1_DROME;DKC1_DROME;DYLT4_MOUSE;EST1A_HUMAN;EXOS3_DROME;EXOS9_DANRE;EXOSX_MOUSE;FBRL_DROME;FKB39_DROME;GAR1_DROME;GNL3_DROME;GPTC4_XENLA;GRWD1_MOUSE;HEAT1_DROME;IF6_DROME;IMP3_MOUSE;KZ_DROME;LAS1L_MOU…	1.16692e-31	30.933		GO:0098827	2.38307e-08	3.35857	11.9288	34	493	endoplasmic reticulum subcompartment	CC	ALG8_DROME;BAP31_PONAB;BASI_HUMAN;BET1_HUMAN;BSCL2_DROME;C4AD1_DROME;C56D2_BOVIN;CP4E2_DROME;CP4S3_DROME;CP6D1_MUSDO;DERL2_PONAB;DPM1_DROME;ENPL_RAT;EXT2_DROME;FAD9_ACHDO;FITM2_DROME;FKBP8_MOUSE;G6PT3_DANRE;HOBIT_DROME;HYEP1_CTEFE;LDAH_DROME;MLECA_XENLA;NB5R3_HUMAN;P4K2B_DANRE;PIPNB_HUMAN;S35B4_DROME;SAC1_DROME;SAR1B_MOUSE;SC31A_HUMAN;SE1L1_MOUSE;SRPRA_DROME;TECR_BOVIN;TM214_BOVIN;TMED6_HUMAN	9.43696e-06	5.02517
GO:0005622	2.36033e-16	2.42154	704.779	788	7240	intracellular	CC	2AAA_DROME;4CLL7_ARATH;AATC_CHICK;ABCD1_DROME;ABCD3_HUMAN;ABCE1_DROME;ABCG1_MOUSE;ABD12_DANRE;ABHD4_BOVIN;ABITM_DROME;ACADM_DROME;ACADS_RAT;ACADV_RAT;ACASE_DROME;ACBD6_MOUSE;ACKR3_CANLF;ACOX1_DROME;ACOX3_HUMAN;ACSF2_HUMAN;ACSL5_MOUSE;ACY1A_RAT;ADA2_HUMAN;ADAT1_DROME;ADCK_DROME;ADHX_DROME;ADT_DROME;AHSA1_HUMAN;AK1A1_MOUSE;AKAP1_MOUSE;AL1L1_XENTR;ALAT2_MOUSE;ALDH2_HUMAN;ALDO2_ARATH;ALDR_BOVIN;ALG11…	2.08417e-13	12.6811		GO:0098827	6.95112e-18	3.51289	29.1592	81	493	endoplasmic reticulum subcompartment	CC	ACSL4_HUMAN;ALG5_DROME;ALG8_DROME;ANO5_MOUSE;BAP31_PONAB;BASI_HUMAN;BET1_HUMAN;BSCL2_DROME;C4AD1_DROME;C56D2_BOVIN;CALR_DROME;CISD2_DROWI;CLP1L_CHICK;COPA_HUMAN;CP4E2_DROME;CP4S3_DROME;CP6D1_MUSDO;CP6V1_DROME;DDRGK_DROMO;DERL1_DROME;DERL2_PONAB;DJB12_HUMAN;DPM1_DROME;EMC1_MOUSE;ENPL_RAT;ERD2_DROME;ERGI3_DANRE;ERP44_MOUSE;EXT2_DROME;FAD9_ACHDO;FITM2_DROME;FKBP8_MOUSE;G6PT3_DANRE;GORS2_RAT;HACD3_BO…	4.24713e-15	14.3719		GO:0031981	2.01909e-34	2.74327	144.299	283	1414	nuclear lumen	CC	AAKG2_MOUSE;ABCF1_HUMAN;ABCG1_MOUSE;ADAR_DROME;ADAT1_DROME;AK17A_HUMAN;ALKB1_MOUSE;ALPL_ARATH;ANM1_HUMAN;APBP2_MOUSE;ARMC5_RAT;ASH2_DROME;BAZ1A_HUMAN;BDP1_HUMAN;BNIP3_HUMAN;BOD1_RAT;BOP1_DROGR;BRX1_DROME;BYS_DROME;C1D_XENLA;CAPAM_MOUSE;CARL1_HUMAN;CB042_MOUSE;CC137_MOUSE;CCNC_DROPS;CCNK_HUMAN;CCNL2_RAT;CDC16_HUMAN;CDC5L_HUMAN;CHERP_HUMAN;COX10_MOUSE;CPSF6_DROME;DC2L1_MOUSE;DCA11_RAT;DDX17_MOUSE;D…	1.67383e-31	30.7763		GO:0031984	1.53763e-07	2.74535	18.0504	42	746	organelle subcompartment	CC	ALG8_DROME;BAP31_PONAB;BASI_HUMAN;BET1_HUMAN;BSCL2_DROME;C4AD1_DROME;C56D2_BOVIN;CP4E2_DROME;CP4S3_DROME;CP6D1_MUSDO;DERL2_PONAB;DPM1_DROME;ENPL_RAT;EXT2_DROME;FAD9_ACHDO;FITM2_DROME;FKBP8_MOUSE;G6PT3_DANRE;GALT1_DROME;HIP14_DROME;HOBIT_DROME;HYEP1_CTEFE;LDAH_DROME;MLECA_XENLA;MPRI_HUMAN;NB5R3_HUMAN;P4K2B_DANRE;PIPNB_HUMAN;S35B4_DROME;S39AD_DROME;SAC1_DROME;SAR1B_MOUSE;SC31A_HUMAN;SE1L1_MOUSE;SLY…	6.08902e-05	4.21545
GO:0009062	8.11154e-16	11.5577	4.99871	28	51	fatty acid catabolic process	BP	ABCD1_DROME;ABCD3_HUMAN;ACADM_DROME;ACADS_RAT;ACADV_RAT;ACOX1_DROME;ACOX3_HUMAN;CACP_RAT;CPT1A_MOUSE;CPT2_XENLA;DHB4_DROME;DHB4_RAT;ECH1_RAT;ECHA_PIG;ECHB_PANTR;ECI1_MOUSE;ETFA_MACFA;ETFD_RAT;HACL1_MOUSE;HPCD_METS5;NUDT8_MOUSE;OCTC_HUMAN;PEX5_CRIGR;PM34_HUMAN;S27A4_HUMAN;SCP2_CHICK;THIM_HUMAN;TYSD1_HUMAN	4.63574e-12	11.3339		GO:0006888	1.30344e-11	7.57438	4.32225	23	74	ER to Golgi vesicle-mediated transport	BP	ARL1_DROME;BAP31_PONAB;BET1_HUMAN;COG3_DROME;COPA_HUMAN;COPB2_DROME;COPB_DROPS;COPD_BOVIN;COPG_DROME;ERGI3_DANRE;LMAN1_HUMAN;MESD_DROME;SAR1B_MOUSE;SC23A_XENTR;SC24C_HUMAN;SC31A_HUMAN;SEC13_DROME;SLY1_DROME;TBC20_MOUSE;TMED6_HUMAN;TPPC1_RAT;YIF1B_HUMAN;YIPF5_XENLA	5.4888e-08	7.26052		GO:0042254	1.1019e-33	5.89269	26.8086	99	261	ribosome biogenesis	BP	BOP1_DROGR;BRX1_DROME;BYS_DROME;C1D_XENLA;DDX17_MOUSE;DDX18_DROME;DDX27_BOVIN;DDX47_DROME;DDX49_DROME;DDX51_DROME;DDX52_DROME;DDX56_HUMAN;DER_CHLTE;DHX33_DROME;DIM1_DROME;DKC1_DROME;EFL1_HUMAN;EXOS3_DROME;EXOS9_DANRE;EXOSX_MOUSE;FBRL_DROME;GAR1_DROME;GNL3_DROME;HEAT1_DROME;HEAT3_HUMAN;IF6_DROME;IMP3_MOUSE;KAD6_DROME;KZ_DROME;LAS1L_MOUSE;LSG1_DROME;MASU1_MOUSE;MBB1A_DROME;MBM_DROME;MDN1_HUMAN;MDN1…	6.23456e-30	29.2052		GO:0016491	5.53461e-07	2.96458	13.0238	33	548	oxidoreductase activity	MF	ACADS_RAT;ADHX_DROME;AL1L1_XENTR;ALDO2_ARATH;ALDR_BOVIN;C4AD1_DROME;CACP_RAT;CP4E2_DROME;CP4S3_DROME;CP6D1_MUSDO;CRYM_HUMAN;D2HDH_HUMAN;DHB13_HUMAN;DHRS4_RABIT;DHRS7_DROME;DPYD_DANRE;ETHE1_MOUSE;FABG_THEMA;FAD9_ACHDO;FRIH_ECHGR;GILT_BOVIN;GSTT1_MOUSE;HEM6_DROME;LUCI_PHOPY;MAOX_ANAPL;MDHM_RAT;NB5R3_HUMAN;RDH13_HUMAN;SDR1_AEDAE;SERA_MOUSE;SSDH_MOUSE;SUOX_DROME;TECR_BOVIN	0.000412882	3.38417
GO:0043229	1.66431e-14	1.85476	576.088	674	5918	intracellular organelle	CC	2AAA_DROME;4CLL7_ARATH;ABCD1_DROME;ABCD3_HUMAN;ABCG1_MOUSE;ABD12_DANRE;ABHD4_BOVIN;ABITM_DROME;ACADM_DROME;ACADS_RAT;ACADV_RAT;ACASE_DROME;ACBD6_MOUSE;ACKR3_CANLF;ACOX1_DROME;ACOX3_HUMAN;ACSF2_HUMAN;ACSL5_MOUSE;ADA2_HUMAN;ADAT1_DROME;ADCK_DROME;ADT_DROME;AHSA1_HUMAN;AKAP1_MOUSE;ALAT2_MOUSE;ALDH2_HUMAN;ALG11_HUMAN;ALG8_DROME;AL_DROME;AMACR_MOUSE;AMPE_HUMAN;AN13C_HUMAN;ANFY1_MOUSE;ANGEL_DROME;ANM1_…	1.46958e-11	10.8328		GO:0048475	1.58716e-10	10.3156	2.60244	17	44	coated membrane	CC	AP2S1_PONAB;AP3B2_HUMAN;AP3D_DROME;AP3M1_PONAB;AP3S2_BOVIN;COPA_HUMAN;COPB2_DROME;COPB_DROPS;COPD_BOVIN;COPG_DROME;COPZ1_BOVIN;MPRI_HUMAN;SAR1B_MOUSE;SC23A_XENTR;SC24C_HUMAN;SC31A_HUMAN;SEC13_DROME	9.69752e-08	7.01334		GO:0005634	7.76285e-32	2.28817	323.09	487	3166	nucleus	CC	AAKG2_MOUSE;ABCF1_HUMAN;ABCG1_MOUSE;ABITM_DROME;ADAR_DROME;ADAT1_DROME;ADF1_DROME;AIMP2_DROME;AK17A_HUMAN;ALKB1_MOUSE;ALKB6_DANRE;ALPL_ARATH;ANM1_HUMAN;ANM5_DROME;ANM6_DANRE;APBP2_MOUSE;ARMC5_RAT;ASH2_DROME;ATFC_BOMMO;ATR_DROME;AUB_DROME;BAZ1A_HUMAN;BCCIP_DROME;BDP1_HUMAN;BIRC6_HUMAN;BLCAP_DIDVI;BN3D2_DROME;BNIP3_HUMAN;BOD1_RAT;BOP1_DROGR;BRAT1_MOUSE;BRX1_DROME;BYS_DROME;C1D_XENLA;CAND1_DROME;CAP…	6.43541e-29	28.1914		GO:0005047	1.5188e-06	167.728	0.11883	4	5	signal recognition particle binding	MF	DERL2_PONAB;SRP68_DROME;SRP72_CANLF;SRPRA_DROME	0.00113302	2.94576
GO:0043226	2.31919e-14	1.86625	587.867	684	6039	organelle	CC	2AAA_DROME;4CLL7_ARATH;ABCD1_DROME;ABCD3_HUMAN;ABCG1_MOUSE;ABD12_DANRE;ABHD4_BOVIN;ABITM_DROME;ACADM_DROME;ACADS_RAT;ACADV_RAT;ACASE_DROME;ACBD6_MOUSE;ACKR3_CANLF;ACOX1_DROME;ACOX3_HUMAN;ACSF2_HUMAN;ACSL5_MOUSE;ACY1A_RAT;ADA2_HUMAN;ADAT1_DROME;ADCK_DROME;ADT_DROME;AHSA1_HUMAN;AKAP1_MOUSE;ALAT2_MOUSE;ALDH2_HUMAN;ALG11_HUMAN;ALG8_DROME;AL_DROME;AMACR_MOUSE;AMPE_HUMAN;AN13C_HUMAN;ANFY1_MOUSE;ANGEL_D…	2.04785e-11	10.6887		GO:0030117	1.58716e-10	10.3156	2.60244	17	44	membrane coat	CC	AP2S1_PONAB;AP3B2_HUMAN;AP3D_DROME;AP3M1_PONAB;AP3S2_BOVIN;COPA_HUMAN;COPB2_DROME;COPB_DROPS;COPD_BOVIN;COPG_DROME;COPZ1_BOVIN;MPRI_HUMAN;SAR1B_MOUSE;SC23A_XENTR;SC24C_HUMAN;SC31A_HUMAN;SEC13_DROME	9.69752e-08	7.01334		GO:0006396	1.77934e-31	3.48964	65.532	164	638	RNA processing	BP	ADAR_DROME;ADAT1_DROME;AK17A_HUMAN;ALKB1_MOUSE;ANGEL_DROME;ANM1_HUMAN;BOP1_DROGR;BRX1_DROME;BYS_DROME;C1D_XENLA;CAPAM_MOUSE;CCNL2_RAT;CDC5L_HUMAN;CHERP_HUMAN;CPSF6_DROME;CTU1_DROAN;DDX17_MOUSE;DDX18_DROME;DDX1_DROME;DDX27_BOVIN;DDX47_DROME;DDX49_DROME;DDX51_DROME;DDX52_DROME;DDX54_MOUSE;DDX56_HUMAN;DHX15_DROME;DHX36_RAT;DIM1_DROME;DKC1_DROME;DOA_DROME;DUS1L_HUMAN;DUS3L_HUMAN;ELP1_DROME;ELP2_DROME…	1.00675e-27	26.9971		GO:0031090	5.30272e-06	2.1341	30.4147	55	1257	organelle membrane	CC	ABCD1_DROME;ABCD3_HUMAN;ACADS_RAT;AMPE_HUMAN;AP3M1_PONAB;AT133_HUMAN;BAP31_PONAB;BASI_HUMAN;BET1_HUMAN;BPHL_HUMAN;C56D2_BOVIN;CACP_RAT;CAPU_DROME;CC50A_CHICK;CCZ1_BOVIN;CD63_RABIT;CMC_DROME;COASY_MOUSE;COLT_DROME;DHRS7_DROME;DJC11_MOUSE;EXT2_DROME;FKBP8_MOUSE;FOLC_CRIGR;GALT1_DROME;GPAT1_RAT;HIP14_DROME;HOBIT_DROME;MPRI_HUMAN;NB5R3_HUMAN;NXF1_DROME;P4K2B_DANRE;PEX3_MOUSE;PIPNB_HUMAN;RAGP1_DROME;R…	0.00209988	2.67781
GO:0072329	1.85366e-14	7.61596	7.057	32	72	monocarboxylic acid catabolic process	BP	ABCD1_DROME;ABCD3_HUMAN;ACADM_DROME;ACADS_RAT;ACADV_RAT;ACOX1_DROME;ACOX3_HUMAN;AK1A1_MOUSE;CACP_RAT;CPT1A_MOUSE;CPT2_XENLA;DCXR_MESAU;DHB4_DROME;DHB4_RAT;ECH1_RAT;ECHA_PIG;ECHB_PANTR;ECI1_MOUSE;ETFA_MACFA;ETFD_RAT;GABT_PIG;HACL1_MOUSE;HPCD_METS5;NUDT8_MOUSE;OCTC_HUMAN;PEX5_CRIGR;PM34_HUMAN;S27A4_HUMAN;SCP2_CHICK;SSDH_MOUSE;THIM_HUMAN;TYSD1_HUMAN	1.05936e-10	9.97495		GO:0071702	5.04128e-11	2.23126	56.8901	106	974	organic substance transport	BP	ABCD1_DROME;ABCD3_HUMAN;ACSL4_HUMAN;AIMP1_HUMAN;ALLP_ECOLI;AP2S1_PONAB;AP3B2_HUMAN;AP3D_DROME;AP3M1_PONAB;AP3S2_BOVIN;ARF1_LOCMI;ARL1_DROME;AT133_HUMAN;ATG11_CANAL;BAP31_PONAB;BASI_HUMAN;BET1_HUMAN;CAPU_DROME;CC50A_CHICK;CD63_RABIT;CMC_DROME;COG2_DROME;COG3_DROME;COG5_DROME;COLT_DROME;COPA_HUMAN;COPB2_DROME;COPB_DROPS;COPD_BOVIN;COPG_DROME;COPZ1_BOVIN;DAT_DROME;DCTN2_DROME;DERL2_PONAB;ENPL_RAT;ER…	2.12288e-07	6.67307		GO:0043229	4.07844e-29	2.52615	603.932	748	5918	intracellular organelle	CC	4CLL7_ARATH;AAKG2_MOUSE;ABCD3_HUMAN;ABCF1_HUMAN;ABCG1_MOUSE;ABITM_DROME;ACADM_DROME;ACADV_RAT;ACASE_DROME;ACKR3_CANLF;ACK_DROME;ACOHC_MOUSE;ACON_CAEEL;ACSF2_HUMAN;ACSS3_RAT;ADAR_DROME;ADAT1_DROME;ADCK_DROME;ADF1_DROME;AHSA1_HUMAN;AIMP2_DROME;AK17A_HUMAN;AKA10_MOUSE;AKAP1_MOUSE;ALAT2_MOUSE;ALG11_HUMAN;ALKB1_MOUSE;ALKB6_DANRE;ALPL_ARATH;ALS2_DROME;AN13C_HUMAN;ANGEL_DROME;ANM1_HUMAN;ANM5_DROME;ANM6_…	3.38103e-26	25.471		GO:0016614	3.89929e-06	5.90313	2.3766	12	100	oxidoreductase activity, acting on CH-OH group of donors	MF	ADHX_DROME;ALDR_BOVIN;D2HDH_HUMAN;DHB13_HUMAN;DHRS4_RABIT;DHRS7_DROME;FABG_THEMA;MAOX_ANAPL;MDHM_RAT;RDH13_HUMAN;SDR1_AEDAE;SERA_MOUSE	0.00290887	2.53628
GO:0044446	1.92741e-13	1.68719	395.027	497	4058	intracellular organelle part	CC	2AAA_DROME;ABCD1_DROME;ABCD3_HUMAN;ABCG1_MOUSE;ABD12_DANRE;ACADM_DROME;ACADS_RAT;ACADV_RAT;ACOX3_HUMAN;ACSF2_HUMAN;ACSL5_MOUSE;ADA2_HUMAN;ADAT1_DROME;ADCK_DROME;ADT_DROME;AKAP1_MOUSE;ALDH2_HUMAN;ALG11_HUMAN;ALG8_DROME;AMPE_HUMAN;AN13C_HUMAN;ANFY1_MOUSE;ANGEL_DROME;ANM1_HUMAN;AP1G1_MOUSE;AP1S2_BOVIN;AP2B1_HUMAN;AP2M1_HUMAN;AP3M1_PONAB;APC5_PONAB;APP_DROME;AR1AB_XENLA;ARFG1_HUMAN;ARMC5_RAT;ASCC2_HU…	1.7019e-10	9.76907		GO:0098588	1.54828e-09	2.1915	47.9086	90	810	bounding membrane of organelle	CC	ABCD1_DROME;ABCD3_HUMAN;ACSL4_HUMAN;AMPE_HUMAN;AP2S1_PONAB;AP3B2_HUMAN;AP3D_DROME;ARF1_LOCMI;AT133_HUMAN;B4GT7_MOUSE;BAP31_PONAB;BASI_HUMAN;BET1_HUMAN;BPHL_HUMAN;CC50A_CHICK;CCZ1_BOVIN;CD63_RABIT;CISD2_DROWI;COASY_MOUSE;COG2_DROME;COG3_DROME;COG5_DROME;COPA_HUMAN;COPB2_DROME;COPB_DROPS;COPD_BOVIN;COPG_DROME;COPZ1_BOVIN;CYBR1_DANRE;DHRS7_DROME;DJC11_MOUSE;ERGI3_DANRE;EXT2_DROME;FA20C_DROME;FUCTB_D…	9.45996e-07	6.02411		GO:0016072	1.21302e-28	6.5758	19.0022	76	185	rRNA metabolic process	BP	BOP1_DROGR;BRX1_DROME;BYS_DROME;C1D_XENLA;DDX17_MOUSE;DDX18_DROME;DDX27_BOVIN;DDX47_DROME;DDX49_DROME;DDX51_DROME;DDX52_DROME;DDX56_HUMAN;DIM1_DROME;DKC1_DROME;EXOS3_DROME;EXOS9_DANRE;EXOSX_MOUSE;FBRL_DROME;GAR1_DROME;HEAT1_DROME;IF6_DROME;IMP3_MOUSE;KAD6_DROME;KZ_DROME;LAS1L_MOUSE;MBB1A_DROME;MK16A_XENLA;MTREX_HUMAN;MYC_DROME;NAF1_DROME;NAT10_DROME;NEP1_DROME;NH2L1_DROME;NHP2_DROME;NOB1_BOVIN;NO…	6.86329e-25	24.1635		GO:0044281	1.4418e-06	2.24812	30.0945	56	1274	small molecule metabolic process	BP	4CLL7_ARATH;ABCD1_DROME;ABCD3_HUMAN;ACADS_RAT;ACY1A_RAT;ADA2_HUMAN;ADHX_DROME;AL1L1_XENTR;ALAT2_MOUSE;ALDO2_ARATH;BPHL_HUMAN;CACP_RAT;CGL_PIG;CHCH2_MOUSE;CMC_DROME;COASY_MOUSE;CRYM_HUMAN;D2HDH_HUMAN;DHRS4_RABIT;DPYD_DANRE;DPYS_HUMAN;EXT2_DROME;FAAH2_HUMAN;FABG_THEMA;FAD9_ACHDO;FITM2_DROME;FOLC_CRIGR;GALK2_RAT;GLNA1_DROME;GLYC_BOMMO;GPAT1_RAT;GPDA_DROME;GSH0_RAT;HYEP1_CTEFE;KAD2_DROPS;LGUL_RAT;LKH…	0.00409039	2.38824
GO:0044422	2.99068e-13	1.68127	405.832	507	4169	organelle part	CC	2AAA_DROME;ABCD1_DROME;ABCD3_HUMAN;ABCG1_MOUSE;ABD12_DANRE;ACADM_DROME;ACADS_RAT;ACADV_RAT;ACOX3_HUMAN;ACSF2_HUMAN;ACSL5_MOUSE;ADA2_HUMAN;ADAT1_DROME;ADCK_DROME;ADT_DROME;AKAP1_MOUSE;ALDH2_HUMAN;ALG11_HUMAN;ALG8_DROME;AMPE_HUMAN;AN13C_HUMAN;ANFY1_MOUSE;ANGEL_DROME;ANM1_HUMAN;AP1G1_MOUSE;AP1S2_BOVIN;AP2B1_HUMAN;AP2M1_HUMAN;AP3M1_PONAB;APC5_PONAB;APP_DROME;AR1AB_XENLA;ARC1_DROME;ARFG1_HUMAN;ARMC5_R…	2.64077e-10	9.57827		GO:0071705	2.74772e-10	2.24193	50.1731	95	859	nitrogen compound transport	BP	ACSL4_HUMAN;AIMP1_HUMAN;ALLP_ECOLI;AP2S1_PONAB;AP3B2_HUMAN;AP3D_DROME;AP3M1_PONAB;AP3S2_BOVIN;ARF1_LOCMI;ARL1_DROME;AT133_HUMAN;ATG11_CANAL;BAP31_PONAB;BASI_HUMAN;BET1_HUMAN;CAPU_DROME;CD63_RABIT;CMC_DROME;COG2_DROME;COG3_DROME;COG5_DROME;COLT_DROME;COPA_HUMAN;COPB2_DROME;COPB_DROPS;COPD_BOVIN;COPG_DROME;COPZ1_BOVIN;DAT_DROME;DCTN2_DROME;DERL2_PONAB;ENPL_RAT;ERD2_DROME;ERLEC_MOUSE;EXOC6_DROME;EXO…	1.15706e-06	5.93664		GO:0043226	9.00358e-28	2.5023	616.28	755	6039	organelle	CC	4CLL7_ARATH;AAKG2_MOUSE;ABCD3_HUMAN;ABCF1_HUMAN;ABCG1_MOUSE;ABITM_DROME;ACADM_DROME;ACADV_RAT;ACASE_DROME;ACKR3_CANLF;ACK_DROME;ACOHC_MOUSE;ACON_CAEEL;ACSF2_HUMAN;ACSS3_RAT;ADAR_DROME;ADAT1_DROME;ADCK_DROME;ADF1_DROME;AHSA1_HUMAN;AIMP2_DROME;AK17A_HUMAN;AKA10_MOUSE;AKAP1_MOUSE;ALAT2_MOUSE;ALG11_HUMAN;ALKB1_MOUSE;ALKB6_DANRE;ALPL_ARATH;ALS2_DROME;AN13C_HUMAN;ANGEL_DROME;ANM1_HUMAN;ANM5_DROME;ANM6_…	7.46397e-25	24.127		GO:0016616	5.96538e-06	6.24099	2.06764	11	87	oxidoreductase activity, acting on the CH-OH group of donors, NAD or NADP as acceptor	MF	ADHX_DROME;ALDR_BOVIN;DHB13_HUMAN;DHRS4_RABIT;DHRS7_DROME;FABG_THEMA;MAOX_ANAPL;MDHM_RAT;RDH13_HUMAN;SDR1_AEDAE;SERA_MOUSE	0.00445017	2.35162
GO:0030258	5.99412e-14	5.89199	9.50735	37	97	lipid modification	BP	ABCD1_DROME;ABCD3_HUMAN;ACADM_DROME;ACADS_RAT;ACADV_RAT;ACOX1_DROME;ACOX3_HUMAN;ADRL_DROME;CACP_RAT;CPT1A_MOUSE;CPT2_XENLA;DHB4_DROME;DHB4_RAT;ECH1_RAT;ECHA_PIG;ECHB_PANTR;ECI1_MOUSE;ETFA_MACFA;ETFD_RAT;FYV1_DROME;HACL1_MOUSE;HPCD_METS5;INP4B_HUMAN;IP3KB_RAT;MBOA7_DROME;MTMR9_MOUSE;OCTC_HUMAN;P4K2B_DANRE;PEX5_CRIGR;PM34_HUMAN;SAC1_DROME;SCP2_CHICK;SPHK1_CAEEL;SYNJ1_HUMAN;THIM_HUMAN;TTC7B_MOUSE;TY…	3.42564e-10	9.46526		GO:1905369	3.38926e-09	8.71771	2.72073	16	46	endopeptidase complex	CC	PR6AA_XENLA;PRS8_DROME;PSA3_DROME;PSA4_DROME;PSA5_DROME;PSA71_DROME;PSB2_DROME;PSB3_DROME;PSB4_DROME;PSB7_RAT;PSD12_PONAB;PSDE_DROME;PSMD3_DROME;PSMD6_DROME;PSMD8_PONAB;TXNL1_HUMAN	2.07084e-06	5.68385		GO:0006364	1.34359e-27	6.69672	17.7697	72	173	rRNA processing	BP	BOP1_DROGR;BRX1_DROME;BYS_DROME;C1D_XENLA;DDX17_MOUSE;DDX18_DROME;DDX27_BOVIN;DDX47_DROME;DDX49_DROME;DDX51_DROME;DDX52_DROME;DDX56_HUMAN;DIM1_DROME;DKC1_DROME;EXOS3_DROME;EXOS9_DANRE;EXOSX_MOUSE;FBRL_DROME;GAR1_DROME;HEAT1_DROME;IF6_DROME;IMP3_MOUSE;KAD6_DROME;KZ_DROME;LAS1L_MOUSE;MK16A_XENLA;MTREX_HUMAN;NAF1_DROME;NAT10_DROME;NEP1_DROME;NH2L1_DROME;NHP2_DROME;NOB1_BOVIN;NOL10_XENLA;NOL6_DROSI;N…	7.60203e-24	23.1191		GO:0098588	2.09387e-05	2.26912	19.599	39	810	bounding membrane of organelle	CC	ABCD1_DROME;ABCD3_HUMAN;AMPE_HUMAN;AT133_HUMAN;BAP31_PONAB;BASI_HUMAN;BET1_HUMAN;BPHL_HUMAN;CC50A_CHICK;CCZ1_BOVIN;CD63_RABIT;COASY_MOUSE;DHRS7_DROME;DJC11_MOUSE;EXT2_DROME;GALT1_DROME;GPAT1_RAT;HIP14_DROME;MPRI_HUMAN;NB5R3_HUMAN;P4K2B_DANRE;PEX3_MOUSE;PIPNB_HUMAN;S17A9_MOUSE;S22A3_RAT;S22AL_MOUSE;S35B4_DROME;S39AD_DROME;SAC1_DROME;SAR1B_MOUSE;SC31A_HUMAN;SLY1_DROME;SRPRA_DROME;TM135_XENLA;TM165_…	0.00829173	2.08135
GO:0005777	2.32818e-11	4.93065	9.73451	34	100	peroxisome	CC	4CLL7_ARATH;ABCD1_DROME;ABCD3_HUMAN;ACOX1_DROME;ACOX3_HUMAN;AMACR_MOUSE;CACP_RAT;CRYM_HUMAN;DHB4_DROME;DHB4_RAT;DHRS4_RABIT;DHRS7_DROME;ECH1_RAT;HACL1_MOUSE;HSDL2_XENLA;IDHC_RAT;LUCI_PHOPY;OCTC_HUMAN;OXDD_MOUSE;PEX10_HUMAN;PEX13_BOVIN;PEX14_RAT;PEX16_DANRE;PEX3_MOUSE;PEX5_CRIGR;PM34_HUMAN;PX11B_MOUSE;PXMP2_BOVIN;S22AL_MOUSE;SCP2_CHICK;SODC_DROWI;TM135_XENLA;TNG11_DROME;TYSD1_HUMAN	2.05578e-08	7.68702		GO:0000502	3.38926e-09	8.71771	2.72073	16	46	proteasome complex	CC	PR6AA_XENLA;PRS8_DROME;PSA3_DROME;PSA4_DROME;PSA5_DROME;PSA71_DROME;PSB2_DROME;PSB3_DROME;PSB4_DROME;PSB7_RAT;PSD12_PONAB;PSDE_DROME;PSMD3_DROME;PSMD6_DROME;PSMD8_PONAB;TXNL1_HUMAN	2.07084e-06	5.68385		GO:0034470	4.40091e-27	4.39965	33.6904	103	328	ncRNA processing	BP	ADAT1_DROME;ALKB1_MOUSE;BOP1_DROGR;BRX1_DROME;BYS_DROME;C1D_XENLA;CTU1_DROAN;DDX17_MOUSE;DDX18_DROME;DDX1_DROME;DDX27_BOVIN;DDX47_DROME;DDX49_DROME;DDX51_DROME;DDX52_DROME;DDX56_HUMAN;DIM1_DROME;DKC1_DROME;DUS1L_HUMAN;DUS3L_HUMAN;ELP1_DROME;ELP2_DROME;ELP4_DROME;EXOS3_DROME;EXOS9_DANRE;EXOSX_MOUSE;FBRL_DROME;GAR1_DROME;HEAT1_DROME;IF6_DROME;IMP3_MOUSE;INT1_DROME;INT2_DROME;INT4_DROME;INT5_DROME;I…	2.49004e-23	22.6038		GO:0006810	3.52437e-06	2.04369	42.3307	70	1792	transport	BP	ABCD1_DROME;ABCD3_HUMAN;AP3M1_PONAB;AT133_HUMAN;BAP31_PONAB;BASI_HUMAN;BET1_HUMAN;CAPU_DROME;CC50A_CHICK;CCZ1_BOVIN;CD63_RABIT;CMC_DROME;COLT_DROME;CREG1_MOUSE;CRQ_DROME;CRYM_HUMAN;DAT_DROME;DERL2_PONAB;DNJC5_DROME;DYN_DROME;ENPL_RAT;FRIH_ECHGR;G6PT3_DANRE;GLNA1_DROME;GR39B_DROME;HDAC6_HUMAN;HEP_DROME;HIP14_DROME;HOBIT_DROME;MDHM_RAT;MOT12_HUMAN;MPRI_HUMAN;NAC1_RAT;NADK_HUMAN;NPC2_BOVIN;NPC2_DROM…	0.00999863	2.00006
GO:0042579	2.32818e-11	4.93065	9.73451	34	100	microbody	CC	4CLL7_ARATH;ABCD1_DROME;ABCD3_HUMAN;ACOX1_DROME;ACOX3_HUMAN;AMACR_MOUSE;CACP_RAT;CRYM_HUMAN;DHB4_DROME;DHB4_RAT;DHRS4_RABIT;DHRS7_DROME;ECH1_RAT;HACL1_MOUSE;HSDL2_XENLA;IDHC_RAT;LUCI_PHOPY;OCTC_HUMAN;OXDD_MOUSE;PEX10_HUMAN;PEX13_BOVIN;PEX14_RAT;PEX16_DANRE;PEX3_MOUSE;PEX5_CRIGR;PM34_HUMAN;PX11B_MOUSE;PXMP2_BOVIN;S22AL_MOUSE;SCP2_CHICK;SODC_DROWI;TM135_XENLA;TNG11_DROME;TYSD1_HUMAN	2.05578e-08	7.68702		GO:0005794	5.07067e-09	2.42094	31.5842	66	534	Golgi apparatus	CC	ACOHC_HUMAN;AIMP1_HUMAN;AP3B2_HUMAN;AP3D_DROME;AP3M1_PONAB;AP3S2_BOVIN;ARF1_LOCMI;ARL1_DROME;B4GT7_MOUSE;BASI_HUMAN;BET1_HUMAN;CC50A_CHICK;COG2_DROME;COG3_DROME;COG5_DROME;COPA_HUMAN;COPB2_DROME;COPB_DROPS;COPD_BOVIN;COPG_DROME;COPZ1_BOVIN;CSPG2_HUMAN;DYM_DROME;ERD2_DROME;ERGI3_DANRE;EXT2_DROME;F91A1_DANRE;FA20C_DROME;FAS_MOUSE;FUCTB_DROME;GALT1_DROME;GANAB_PIG;GDIA_RAT;GGA1_HUMAN;GORS2_RAT;GP108…	3.09818e-06	5.50889		GO:0034660	5.07892e-27	3.62605	49.4058	130	481	ncRNA metabolic process	BP	ADAT1_DROME;ALKB1_MOUSE;AUB_DROME;BN3D2_DROME;BOP1_DROGR;BRX1_DROME;BYS_DROME;C1D_XENLA;CTU1_DROAN;DDX17_MOUSE;DDX18_DROME;DDX1_DROME;DDX27_BOVIN;DDX47_DROME;DDX49_DROME;DDX51_DROME;DDX52_DROME;DDX56_HUMAN;DIM1_DROME;DKC1_DROME;DUS1L_HUMAN;DUS3L_HUMAN;ELP1_DROME;ELP2_DROME;ELP4_DROME;EXOS3_DROME;EXOS9_DANRE;EXOSX_MOUSE;FBRL_DROME;GAR1_DROME;HEAT1_DROME;ICE1_DROME;IF6_DROME;IMP3_MOUSE;INT1_DROME;I…	2.87365e-23	22.5416		GO:0005777	2.76426e-05	5.19825	2.41963	11	100	peroxisome	CC	4CLL7_ARATH;ABCD1_DROME;ABCD3_HUMAN;CACP_RAT;CRYM_HUMAN;DHRS4_RABIT;DHRS7_DROME;LUCI_PHOPY;PEX3_MOUSE;S22AL_MOUSE;TM135_XENLA	0.0109465	1.96073
GO:0044464	4.67873e-11	2.90817	792.195	839	8138	cell part	CC	2AAA_DROME;4CLL7_ARATH;AATC_CHICK;ABCD1_DROME;ABCD3_HUMAN;ABCE1_DROME;ABCG1_MOUSE;ABD12_DANRE;ABHD4_BOVIN;ABITM_DROME;ACADM_DROME;ACADS_RAT;ACADV_RAT;ACASE_DROME;ACBD6_MOUSE;ACE_DROME;ACKR3_CANLF;ACOX1_DROME;ACOX3_HUMAN;ACSF2_HUMAN;ACSL5_MOUSE;ACY1A_RAT;ADA2_HUMAN;ADAT1_DROME;ADCK_DROME;ADCY9_CHICK;ADHX_DROME;ADRL_DROME;ADT_DROME;AHSA1_HUMAN;AK1A1_MOUSE;AKAP1_MOUSE;AL1L1_XENTR;ALAT2_MOUSE;ALDH2_H…	4.13132e-08	7.38391		GO:0098791	5.7277e-09	2.88662	19.0451	47	322	Golgi subcompartment	CC	AP3D_DROME;ARF1_LOCMI;ARL1_DROME;B4GT7_MOUSE;BASI_HUMAN;BET1_HUMAN;COG2_DROME;COG3_DROME;COG5_DROME;COPA_HUMAN;COPB2_DROME;COPB_DROPS;COPD_BOVIN;COPG_DROME;COPZ1_BOVIN;ERGI3_DANRE;EXT2_DROME;F91A1_DANRE;FA20C_DROME;FUCTB_DROME;GALT1_DROME;GGA1_HUMAN;GORS2_RAT;GP108_RAT;GSLG1_MOUSE;HIP14_DROME;JIP3_DROPS;LMAN1_HUMAN;MPRI_HUMAN;P4K2B_DANRE;PIPNB_HUMAN;PMYT1_DROME;RENR_DROME;S35B1_DROME;S35B4_DROME;…	3.49963e-06	5.45598		GO:0005622	7.88987e-21	2.76344	738.842	835	7240	intracellular	CC	128UP_DROME;4CLL7_ARATH;AAKG2_MOUSE;AAMP_BOVIN;ABCD3_HUMAN;ABCF1_HUMAN;ABCG1_MOUSE;ABITM_DROME;ABR_MOUSE;ACADM_DROME;ACADV_RAT;ACASE_DROME;ACKR3_CANLF;ACK_DROME;ACOHC_MOUSE;ACON_CAEEL;ACSF2_HUMAN;ACSS3_RAT;ADAR_DROME;ADAT1_DROME;ADCK_DROME;ADF1_DROME;AHSA1_HUMAN;AIMP2_DROME;AK17A_HUMAN;AK1A1_MOUSE;AKA10_MOUSE;AKAP1_MOUSE;ALAT2_MOUSE;ALDR_BOVIN;ALG11_HUMAN;ALKB1_MOUSE;ALKB6_DANRE;ALPL_ARATH;ALS2_D…	6.5407e-18	17.1844		GO:0042579	2.76426e-05	5.19825	2.41963	11	100	microbody	CC	4CLL7_ARATH;ABCD1_DROME;ABCD3_HUMAN;CACP_RAT;CRYM_HUMAN;DHRS4_RABIT;DHRS7_DROME;LUCI_PHOPY;PEX3_MOUSE;S22AL_MOUSE;TM135_XENLA	0.0109465	1.96073
GO:0005623	4.67873e-11	2.90817	792.195	839	8138	cell	CC	2AAA_DROME;4CLL7_ARATH;AATC_CHICK;ABCD1_DROME;ABCD3_HUMAN;ABCE1_DROME;ABCG1_MOUSE;ABD12_DANRE;ABHD4_BOVIN;ABITM_DROME;ACADM_DROME;ACADS_RAT;ACADV_RAT;ACASE_DROME;ACBD6_MOUSE;ACE_DROME;ACKR3_CANLF;ACOX1_DROME;ACOX3_HUMAN;ACSF2_HUMAN;ACSL5_MOUSE;ACY1A_RAT;ADA2_HUMAN;ADAT1_DROME;ADCK_DROME;ADCY9_CHICK;ADHX_DROME;ADRL_DROME;ADT_DROME;AHSA1_HUMAN;AK1A1_MOUSE;AKAP1_MOUSE;AL1L1_XENTR;ALAT2_MOUSE;ALDH2_H…	4.13132e-08	7.38391		GO:0005798	7.27331e-09	5.9728	4.43598	20	75	Golgi-associated vesicle	CC	AP3D_DROME;COPA_HUMAN;COPB2_DROME;COPB_DROPS;COPD_BOVIN;COPG_DROME;COPZ1_BOVIN;ERGI3_DANRE;JIP3_DROPS;LMAN1_HUMAN;MPRI_HUMAN;SAR1B_MOUSE;SC23A_XENTR;SC24C_HUMAN;SC31A_HUMAN;SEC13_DROME;SLY1_DROME;TMED2_CRIGR;TMED6_HUMAN;YIF1B_HUMAN	4.444e-06	5.35223		GO:0044424	7.88987e-21	2.76344	738.842	835	7240	intracellular part	CC	128UP_DROME;4CLL7_ARATH;AAKG2_MOUSE;AAMP_BOVIN;ABCD3_HUMAN;ABCF1_HUMAN;ABCG1_MOUSE;ABITM_DROME;ABR_MOUSE;ACADM_DROME;ACADV_RAT;ACASE_DROME;ACKR3_CANLF;ACK_DROME;ACOHC_MOUSE;ACON_CAEEL;ACSF2_HUMAN;ACSS3_RAT;ADAR_DROME;ADAT1_DROME;ADCK_DROME;ADF1_DROME;AHSA1_HUMAN;AIMP2_DROME;AK17A_HUMAN;AK1A1_MOUSE;AKA10_MOUSE;AKAP1_MOUSE;ALAT2_MOUSE;ALDR_BOVIN;ALG11_HUMAN;ALKB1_MOUSE;ALKB6_DANRE;ALPL_ARATH;ALS2_D…	6.5407e-18	17.1844		GO:0005739	3.32172e-05	2.13861	22.9864	43	950	mitochondrion	CC	ABCD3_HUMAN;ACADS_RAT;ALAT2_MOUSE;BASI_HUMAN;BPHL_HUMAN;CACP_RAT;CHCH2_MOUSE;CMC_DROME;COASY_MOUSE;COLT_DROME;COXM1_BOVIN;CRYM_HUMAN;D2HDH_HUMAN;DHRS4_RABIT;DJC11_MOUSE;ETHE1_MOUSE;FKBP8_MOUSE;FOLC_CRIGR;GLNA1_DROME;GLYC_BOMMO;GPAT1_RAT;HEM6_DROME;HOBIT_DROME;IPYR_DROME;KAD2_DROPS;MAOX_ANAPL;MDHM_RAT;MOCS1_DROME;NB5R3_HUMAN;PEBPH_CAEEL;PPM1H_HUMAN;PRDX4_MOUSE;RDH13_HUMAN;S22A3_RAT;S2535_DANRE;SCO…	0.013154	1.88094
GO:0044242	2.00866e-11	4.97577	9.70337	34	99	cellular lipid catabolic process	BP	ABCD1_DROME;ABCD3_HUMAN;ABD12_DANRE;ACADM_DROME;ACADS_RAT;ACADV_RAT;ACASE_DROME;ACOX1_DROME;ACOX3_HUMAN;AMACR_MOUSE;CACP_RAT;CPT1A_MOUSE;CPT2_XENLA;DHB4_DROME;DHB4_RAT;ECH1_RAT;ECHA_PIG;ECHB_PANTR;ECI1_MOUSE;ETFA_MACFA;ETFD_RAT;HACL1_MOUSE;HPCD_METS5;IDHC_RAT;NUDT8_MOUSE;OCTC_HUMAN;PEX5_CRIGR;PLBL_DROME;PM34_HUMAN;S27A4_HUMAN;SCP2_CHICK;SPO14_YEAST;THIM_HUMAN;TYSD1_HUMAN	1.14795e-07	6.94008		GO:0048193	1.64397e-09	4.13023	9.22858	31	158	Golgi vesicle transport	BP	AP3D_DROME;AP3S2_BOVIN;ARL1_DROME;BAP31_PONAB;BET1_HUMAN;COG2_DROME;COG3_DROME;COG5_DROME;COPA_HUMAN;COPB2_DROME;COPB_DROPS;COPD_BOVIN;COPG_DROME;COPZ1_BOVIN;ERGI3_DANRE;EXOC6_DROME;GGA1_HUMAN;LMAN1_HUMAN;MESD_DROME;PIPNB_HUMAN;SAR1B_MOUSE;SC23A_XENTR;SC24C_HUMAN;SC31A_HUMAN;SEC13_DROME;SLY1_DROME;TBC20_MOUSE;TMED6_HUMAN;TPPC1_RAT;YIF1B_HUMAN;YIPF5_XENLA	6.92275e-06	5.15972		GO:0030684	1.52685e-20	8.9756	8.87835	43	87	preribosome	CC	BOP1_DROGR;BYS_DROME;DIM1_DROME;EXOSX_MOUSE;FBRL_DROME;HEAT1_DROME;IMP3_MOUSE;MDN1_HUMAN;MDN1_SCHPO;MK16A_XENLA;NAT10_DROME;NEP1_DROME;NH2L1_DROME;NOB1_BOVIN;NOC3L_DROME;NOC4B_XENLA;NOL10_XENLA;NOL6_DROSI;NOP56_HUMAN;PESC_DROMO;PWP2_HUMAN;RIOK1_MOUSE;RIOK2_MOUSE;RIOK3_HUMAN;RPF1_DROME;RRP5_HUMAN;RRS1_BOVIN;SAS10_DROME;SPB1_MOUSE;TDIF2_MOUSE;U3IP2_MOUSE;UTP11_DROME;UTP15_HUMAN;UTP18_DROME;UTP25_HU…	1.26576e-17	16.8976		GO:0051234	5.79951e-06	1.99529	44.5984	72	1888	establishment of localization	BP	ABCD1_DROME;ABCD3_HUMAN;AP3M1_PONAB;AT133_HUMAN;BAP31_PONAB;BASI_HUMAN;BET1_HUMAN;CAPU_DROME;CC50A_CHICK;CCZ1_BOVIN;CD63_RABIT;CMC_DROME;COLT_DROME;CP135_HUMAN;CREG1_MOUSE;CRQ_DROME;CRYM_HUMAN;DAT_DROME;DERL2_PONAB;DNJC5_DROME;DYN_DROME;ENPL_RAT;FRIH_ECHGR;G6PT3_DANRE;GLNA1_DROME;GR39B_DROME;HDAC6_HUMAN;HEP_DROME;HIP14_DROME;HOBIT_DROME;MDHM_RAT;MOT12_HUMAN;MPRI_HUMAN;NAC1_RAT;NADK_HUMAN;NPC2_BOV…	0.0164532	1.78375
[truncated: 180 more rows]

## Sheet: S7 - Glycomics
Mass	Composition	Mid Gut	PM - Milk_1	PM - Milk_2	PM - Milk_3
910.71	HexNAc(2)Hex(3)		3.80%	2.04%	3.60%
1056.81	HexNAc(2)Hex(3)Fuc(1)	2.99%	0.78%
1234.91	HexNAc(2)Hex(5)	4.00%	3.16%	2.15%	2.95%
1397.01	HexNAc(2)Hex(6)	3.54%	7.13%	3.96%	7.13%
1675.51	HexNAc(2)Hex(6)Fuc(1)Pent(1)	2.89%
1559.11	HexNAc(2)Hex(7)	6.73%	8.12%	6.23%	7.51%
1721.31	HexNAc(2)Hex(8)	13.44%	12.79%	12.57%	11.73%
1883.41	HexNAc(2)Hex(9)	65.56%	57.66%	71.17%	61.44%
2530.31	HexNAc(2)Hex(13)	0.85%
1113.81	HexNAc(3)Hex(3)		3.82%	1.89%	3.79%
1317.01	HexNAc(4)Hex(3)		1.02%
1463.11	HexNAc(4)Hex(3)Fuc(1)		1.70%		1.85%

## Sheet: S8 - Glycan Frequency
Glycans	MS Alias name	Milk_1	Milk_2	Milk_3	Milk_4	Sera_1	Sera_2	Sera_3	Sera_4	On-Sheep_1	On-Sheep_2	On-Sheep_3	On-Sheep_4
HexNAc(1)		0.691654	0.0225864	0.011408	0.402	0.0781164	0.202	0.013614	0.119958	0.260846	0.385196	0.442022	0.401175
[truncated: 42 more rows]

## Sheet: S9 - Glycoproteomics Proteins
Protein Name	Name	20240517_Diet_PM_Milk_1.wiff2(1)	20240517_Diet_PM_Milk_2.wiff2(1)	20240517_Diet_PM_Milk_3.wiff2(1)	20240517_Diet_PM_Milk_4.wiff2(1)	20240517_Diet_PM_Sera_1.wiff(1)	20240517_Diet_PM_Sera_2.wiff(1)	20240517_Diet_PM_Sera_3.wiff(1)	20240517_Diet_PM_Sera_4.wiff(1)	20240517_Diet_PM_On-Sheep_1.wiff(1)	20240517_Diet_PM_On-Sheep_2.wiff(1)	20240517_Diet_PM_On-Sheep_3.wiff(1)	20240517_Diet_PM_On-Sheep_4.wiff(1)
[truncated: 246 more rows]

[truncated: 3 more sheets: S10 - Glycopeptides, S11 - Enriched Glycopeptides , S12 - Larval Bioassay ]
