# Supplementary material
Source: Research Square preprint supplement (doi:10.21203/rs.3.rs-9153032/v1)
Supplement: Supplementary file 1 [file 9804022bca01cc93e5225d49.docx]

**Supplementary Figures**

**
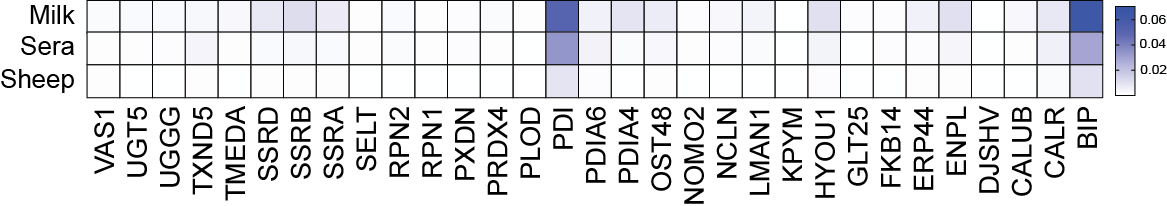
**

**Figure S1: Endoplasmic reticulum proteins in the PM of differently fed larvae.** Proteinsassociated with “endoplasmic reticulum” like GO terms. Normalized protein abundance is relative to total and values show mean.
